# Supplementary material for: Influence on the fermentation quality, microbial diversity, and metabolomics in the ensiling of sunflower stalks and alfalfa
Source: Front Plant Sci. 2024 Jan 26;15:1333207. doi: 10.3389/fpls.2024.1333207 (PMC10853385; doi:10.3389/fpls.2024.1333207)
Supplement: Supplementary file 1 [file Table_1.xlsx]

## Sheet: Sheet1
Index	Q1 (Da)	Q3 (Da)	Molecular weight (Da)	Formula	Ionization model	Compounds	Class I	Class II	CAS	Level	A_1	A_2	A_3	S_1	S_2	S_3	A0S10_1	A0S10_2	A0S10_3	A5S5_1	A5S5_2	A5S5_3	A6S4_1	A6S4_2	A6S4_3	QC01	QC02	QC03	cpd_ID	kegg_map
Wbmp002283	146.06	118.06	145.053	C9H7NO	[M+H]+	Α-hydroxyquinoline	Alkaloids	Alkaloids	-	1	2.603e+07	2.33504e+07	3.92795e+07	3.40344e+07	2.002e+07	2.45902e+07	1.81101e+07	964894	2.00876e+07	4.94422e+07	4.75993e+07	4.64943e+07	5.52924e+07	5.24453e+07	4.76109e+07	4.05746e+07	4.05644e+07	4.05618e+07	-	-
Zmap010726	353.23	149.1	352.225	C20H32O5	[M+H]+	Balsamiferine E	Terpenoids	Sesquiterpenoids	-	3	2.86557e+06	3.67243e+06	7.9018e+06	478534	534455	813074	109327	122050	113171	519148	437029	481974	607189	598706	551045	3.12071e+06	3.1219e+06	3.1187e+06	-	-
Lmyn004949	269.04	133.03	270.053	C15H10O5	[M-H]-	3,7,3'-Trihydroxyflavone	Flavonoids	Flavones	-	2	1.20802e+06	1.43106e+06	1.43362e+06	78483.5	46277.9	77778	49540.7	79216.1	23768.6	403176	687003	1.48518e+06	1.38151e+06	1.36557e+06	1.46009e+06	1.19036e+06	1.19126e+06	1.19221e+06	-	-
MWS2099	137.06	77.04	136.052	C8H8O2	[M+H]+	4-Methylbenzoic acid	Phenolic acids	Phenolic acids	99-94-5	3	2.27765e+06	2.59792e+06	1.80857e+06	951644	1.02889e+06	817953	3.91894e+06	1.58682e+06	5.1912e+06	2.14755e+06	1.87146e+06	2.40203e+06	1.51879e+06	1.43202e+06	1.20556e+06	1.89247e+06	1.88554e+06	1.8922e+06	C01454	ko01100
Lmxn007955	359.08	329.03	360.084	C18H16O8	[M-H]-	Sudachitin	Flavonoids	Flavones	4281-28-1	3	33151.3	38324.5	37566.1	2.24319e+07	2.19913e+07	2.42996e+07	2.70697e+07	3.25427e+07	2.29047e+07	1.00137e+07	1.12385e+07	9.03556e+06	7.70423e+06	6.06897e+06	5.38556e+06	1.03129e+07	1.03221e+07	1.03642e+07	-	-
mws0597	190.05	146.06	191.058	C10H9NO3	[M-H]-	5-Hydroxyindole-3-acetic acid	Alkaloids	Plumerane	54-16-0	3	85328.3	99469.4	142278	119406	140943	100043	488779	457492	528404	518996	547090	448161	811936	800830	672718	414157	412821	415149	C05635	ko00380,ko01100
Lmbn006152	279.23	59.01	280.24	C18H32O2	[M-H]-	(9Z,11E)-Octadecadienoic acid*	Lipids	Free fatty acids	2540-56-9	1	397384	409483	346992	411188	3274.54	409214	724739	3401.51	4053.83	843069	849412	838273	845393	689694	2633.97	627320	625070	623543	C04056	ko00591
mws1491	279.23	59.01	280.24	C18H32O2	[M-H]-	Linoleic acid*	Lipids	Free fatty acids	60-33-3	1	397384	409483	346992	411188	3274.54	409214	724739	3401.51	4053.83	843069	849412	838273	845393	689694	2633.97	627320	625070	623543	C01595	ko00591,ko01040,ko01100
Wdzn000513	193.07	59.01	194.079	C7H14O6	[M-H]-	(2r,3s,4s,5r)-2,5-bis(hydroxymethyl)-2-methoxyoxolane-3,4-diol	Others	Saccharides	-	2	1.41502e+07	9.3904e+06	1.07369e+07	3.15867e+07	2.5084e+07	2.9519e+07	1.79238e+06	1.19907e+06	1.35693e+06	3.97439e+06	3.2124e+06	3.45726e+06	3.59929e+06	3.62339e+06	4.62804e+06	9.54043e+06	9.52394e+06	9.58331e+06	-	-
Lcsn001385	229.15	185.17	230.163	C11H22N2O3	[M-H]-	Leu Val	Amino acids and derivatives	Amino acids and derivatives	72121-02-9	1	308257	206695	585577	14284.1	168814	24916.8	1.17974e+06	288663	1.01643e+06	1.63214e+06	1.43425e+06	1.85013e+06	1.21245e+06	984813	1.32324e+06	1.48655e+06	1.49741e+06	1.48991e+06	-	-
pmf0293	269.29	209.23	270.292	C18H38O	[M-H]-	1-Octadecanol	Lipids	Free fatty acids	112-92-5	3	3.03903e+06	3.23301e+06	3.024e+06	3.16258e+06	3.06778e+06	3.00603e+06	3.24538e+06	3.04872e+06	3.27115e+06	3.16089e+06	3.30311e+06	3.2087e+06	3.29167e+06	3.07528e+06	3.18802e+06	3.16882e+06	3.17769e+06	3.15423e+06	-	-
mws5045	215.17	169.16	216.173	C12H24O3	[M-H]-	12-Hydroxydodecanoic acid	Lipids	Free fatty acids	505-95-3	2	286954	344613	1.34967e+06	95811.4	85984.2	135406	322956	212434	292593	880332	735983	812374	570205	598153	624377	504990	508494	508610	C08317	-
Wbsp007290	277.18	137.06	276.173	C17H24O3	[M+H]+	Lycoposerramine E	Alkaloids	Alkaloids	-	1	6.34695e+06	5.31777e+06	4.32588e+06	3.71459e+06	4.23004e+06	6.4538e+06	1.49693e+07	1.37065e+07	1.33198e+07	2.783e+07	3.07327e+07	2.7093e+07	3.8359e+07	3.06469e+07	3.24344e+07	1.88838e+07	1.89039e+07	1.90264e+07	-	-
mws0914	271.061	151.003	272.068	C15H12O5	[M-H]-	3,5,7-Trihydroxyflavanone (Pinobanksin)	Flavonoids	Flavanonols	548-82-3	3	6.76843e+06	6.36152e+06	7.19489e+06	1.98881e+06	1.4235e+06	1.82992e+06	5.05368e+06	5.55043e+06	8.53376e+06	1.43142e+07	1.42798e+07	1.44048e+07	16875448	1.48787e+07	1.45902e+07	1.24917e+07	1.2586e+07	1.25001e+07	C09826	ko00941
mws0254	156.08	110.07	155.07	C6H9N3O2	[M+H]+	L-Histidine	Amino acids and derivatives	Amino acids and derivatives	71-00-1	2	7.70527e+07	8.75675e+07	9.89003e+07	6.62585e+07	4.00716e+07	2.0848e+07	3.38782e+07	3.84165e+06	3.47076e+07	9.53353e+07	9.41508e+07	8.82397e+07	1.34201e+08	1.2216e+08	1.40756e+08	1.04326e+08	1.03479e+08	1.04073e+08	C00135	ko00340,ko00410,ko00470,ko00970,ko01100,ko01110,ko01230,ko02010
Zmzn000113	146.05	102.06	147.053	C5H9NO4	[M-H]-	L-threo-3-Methylaspartate	Amino acids and derivatives	Amino acids and derivatives	6061-13-8	1	1.08555e+06	1.20656e+06	684643	409952	477727	324987	444346	188048	396756	291924	278612	459839	423577	379699	747293	993166	997391	1.00185e+06	C03618	ko00630,ko00660,ko01100,ko01200
mws1659	269.05	225.06	270.053	C15H10O5	[M-H]-	Emodin	Quinones	Anthraquinone	518-82-1	1	4.01613e+06	1.37465e+07	1.34948e+07	145010	51347.4	83202.1	127227	741612	127320	9.23754e+06	7.99868e+06	8.25555e+06	5.04122e+06	3.38904e+06	3.00859e+06	5.1938e+06	5.15162e+06	5.18705e+06	C10343	-
Zbqn002318	214.07	114.06	215.079	C9H13NO5	[M-H]-	N-succinyl-proline	Amino acids and derivatives	Amino acids and derivatives	-	2	1.19307e+06	501030	787705	574188	2.15942e+06	607698	2.57412e+06	1.77435e+06	1.686e+06	2.64739e+06	3.07521e+06	4.38909e+06	5.64281e+06	1.86361e+06	4.88905e+06	3.66557e+06	3.65842e+06	3.63448e+06	-	-
Lmbn005369	295.23	195.14	296.235	C18H32O3	[M-H]-	13(S)-HODE;13(S)-Hydroxyoctadeca-9Z,11E-dienoic acid*	Lipids	Free fatty acids	10219-69-9	2	2.08688e+07	1.68705e+07	1.93899e+07	1.35508e+07	2.06773e+07	1.60716e+07	1.9946e+07	2.30552e+07	2.13907e+07	1.72276e+07	1.68e+07	16860084	1.79707e+07	1.84679e+07	2.37268e+07	2.05275e+07	2.0606e+07	2.04223e+07	C14762	ko00591
pmp000003	317.07	302.04	316.058	C16H12O7	[M+H]+	Nepetin (5,7,3',4'-Tetrahydroxy-6-methoxyflavone)	Flavonoids	Flavones	520-11-6	1	169152	571626	337443	65658.8	49054.4	72338.7	183304	136526	226360	1.1375e+06	809951	825912	1.01869e+06	967166	976934	572355	573938	577606	-	-
pmb0865	518.32	184.07	517.317	C26H48NO7P	[M+H]+	LysoPC 18:3(2n isomer)	Lipids	LPC	-	1	1.9098e+06	2.13794e+06	2.07295e+06	738238	828913	651092	2553.14	4822.33	5572.92	15976	18900.9	22464	31610.4	16589	22126.3	1.06643e+06	1.05683e+06	1.05911e+06	-	-
MWS2070	179.07	92.03	180.079	C10H12O3	[M-H]-	Propyl 4-hydroxybenzoate	Phenolic acids	Phenolic acids	94-13-3	3	51034.6	60512	76872.3	111737	169467	158084	191127	216163	363546	963265	1.0713e+06	608420	1.21723e+06	1.08877e+06	1.11407e+06	428805	426230	424701	-	-
Wasn002508	365.18	203.13	366.189	C16H30O9	[M-H]-	Glucosyl 7-methyl-3-methyleneoctane-1,2,6,7-tetraol	Others	Others	-	3	62408.8	76833.1	86355.3	231146	198129	190923	231941	209909	263100	127941	144210	148352	104263	121421	112075	136202	137035	137567	-	-
Lmdp007998	345.1	315.05	344.09	C18H16O7	[M+H]+	Xanthomicrol (5,4'-Dihydroxy-6,7,8-trimethoxyflavone)*	Flavonoids	Flavones	16545-23-6	1	3855.26	6705.1	1930.52	1.19478e+06	1.57932e+06	1.54322e+06	1.27879e+06	1.25141e+06	1.3401e+06	541130	728199	554361	455834	441187	309287	611448	606041	605943	C14476	-
pme3961	252.11	136.06	251.102	C10H13N5O3	[M+H]+	2'-Deoxyadenosine*	Nucleotides and derivatives	Nucleotides and derivatives	958-09-8	2	1.54908e+07	9.88208e+06	8.3443e+06	1.64718e+06	6.66242e+06	4.5201e+06	1.64443e+06	1.31047e+06	1.96869e+06	3.03953e+06	2.26995e+06	3.79301e+06	2.06142e+06	786651	2.15051e+06	3.12276e+06	3.09029e+06	3.10988e+06	C00559	ko00230,ko01100,ko01232,ko02010
Zmdn006929	255.07	213.06	256.074	C15H12O4	[M-H]-	Aloe-Emodin-9-Anthrone	Quinones	Anthraquinone	6247-99-0	1	171111	145838	283938	581653	494148	673436	1.39066e+06	806974	1.14409e+06	1.19144e+06	1.05139e+06	1.54334e+06	854370	657659	874134	745567	737760	742771	C16760	-
mws4057	253.05	117.04	254.058	C15H10O4	[M-H]-	7,4'-Dihydroxyflavone	Flavonoids	Flavones	2196-14-7	3	1.40898e+06	1.42411e+06	369953	25605.1	47012.3	31716.7	53920	56868.1	41804.3	2.20427e+06	2.85987e+06	2.71184e+06	4.58379e+06	4.04946e+06	5.51939e+06	2.607e+06	2.59522e+06	2.62303e+06	C12123	ko00941,ko00943
Lman002117	341.09	179.04	342.095	C15H18O9	[M-H]-	Grevilloside Q	Others	Ketone compounds	1708967-64-9	3	2.04425e+06	2.2842e+06	1.96212e+06	254150	130246	237191	84950.9	10406.7	31285.4	1.12432e+06	1.01797e+06	868178	1.34777e+06	1.27626e+06	1.41391e+06	1.13324e+06	1.13961e+06	1.12737e+06	-	-
Cmdn004031	639.2	621.19	640.2	C29H36O16	[M-H]-	R-Campneoside II	Phenolic acids	Phenolic acids	91050-24-7	3	234373	347032	655007	34779.7	49721.4	131138	9	9	9	476649	371003	565794	336508	499250	275609	256752	254165	256301	-	-
Zmpn003368	293.21	195.14	294.219	C18H30O3	[M-H]-	13S-Hydroxy-9Z,11E,15Z-octadecatrienoic acid	Lipids	Free fatty acids	87984-82-5	3	1.06308e+07	8.07569e+06	1.99828e+07	995798	1.78257e+06	2.13204e+06	6.16675e+06	5.12365e+06	5.0177e+06	1.2115e+07	1.01244e+07	9.90648e+06	1.01232e+07	1.00469e+07	1.06638e+07	1.02031e+07	1.03182e+07	1.02452e+07	C16316	ko00592
zjgp122326	286.09	124.04	285.085	C12H15NO7	[M+H]+	Pyridine-4-formyl-O-β-D-glucopyranoside	Others	Others	-	2	172603	132869	289966	2.15356e+07	1.27913e+07	5.58984e+06	4.63224e+06	5.40363e+06	4.7478e+06	691345	692699	982447	104435	127004	149311	2.46611e+06	2.47518e+06	2.44768e+06	-	-
Lmbn009444	297.24	183.14	298.251	C18H34O3	[M-H]-	Ricinoleic acid	Lipids	Free fatty acids	141-22-0	2	1.41593e+06	1.22646e+06	1.09405e+06	1.05952e+06	1.84041e+06	1.88371e+06	1.86278e+07	5.0766e+06	1.69004e+07	3.30493e+07	3.57234e+07	3.35802e+07	3.23909e+07	2.83885e+07	3.04142e+07	1.9441e+07	1.95431e+07	1.96639e+07	C08365	-
pmn001380	187.1	169.09	188.105	C9H16O4	[M-H]-	Eucommiol	Others	Alcohol compounds	55930-44-4	3	1.29587e+07	1.49229e+07	7.45407e+06	6.38864e+06	9.78536e+06	7.32089e+06	1.26475e+07	2.0441e+07	1.26001e+07	1.66538e+07	1.84869e+07	1.6573e+07	2.5262e+07	2.34573e+07	2.20317e+07	1.52032e+07	1.52715e+07	1.50981e+07	C17878	-
Lmjn006711	249.15	205.16	250.157	C15H22O3	[M-H]-	4,5-Epoxyartemisinic Acid	Terpenoids	Sesquiterpenoids	92466-31-4	3	1.27701e+06	1.14797e+06	991748	918242	960833	1.11223e+06	1.10627e+06	994668	1.00818e+06	886686	1.16369e+06	1.13423e+06	1.10581e+06	1.07853e+06	1.14809e+06	1.10861e+06	1.12167e+06	1.1136e+06	-	-
Lcsn002137	261.01	181.05	262.015	C9H10O7S	[M-H]-	Homovanillic acid sulfate	Organic acids	Organic acids	38339-06-9	2	6.40299e+06	5.76238e+06	8.59111e+06	3.85137e+07	2.99232e+07	3.02637e+07	1.39108e+07	6.54522e+06	1.1991e+07	3.31412e+06	3.21961e+06	3.98909e+06	2.37923e+06	2.36164e+06	1.96851e+06	8.78882e+06	8.84088e+06	8.73667e+06	-	-
Lmbn005923	277.22	59.01	278.225	C18H30O2	[M-H]-	Crepenynic acid	Lipids	Free fatty acids	2277-31-8	1	3.7271e+06	3.28967e+06	3.12996e+06	1.06014e+06	1.5885e+06	1.38847e+06	2.41987e+06	2.14907e+06	2.29834e+06	4.13519e+06	4.44023e+06	4.30212e+06	5.05408e+06	4.32048e+06	4.35486e+06	3.88989e+06	3.85251e+06	3.8474e+06	C07289	ko00591
MWS1872	225.05	105.03	224.047	C14H8O3	[M+H]+	1-Hydroxyanthraquinone	Quinones	Anthraquinone	129-43-1	3	80992.4	93979.3	85790.2	143723	145573	142320	173472	131110	137283	130119	122801	129864	102780	144649	138999	126882	126564	125418	C02980	-
MWSmce248	163.04	119.05	164.047	C9H8O3	[M-H]-	3-Hydroxycinnamic Acid*	Phenolic acids	Phenolic acids	14755-02-3	2	6.03709e+06	5.00536e+06	2.59583e+06	1.00266e+06	2775120	1.31313e+06	1.45151e+06	1929655	1.42608e+06	929695	398807	911245	286664	628055	1.14146e+06	2544200	2.54714e+06	2.57257e+06	C12621	ko00360,ko01100
Lmbn002648	163.04	119.05	164.047	C9H8O3	[M-H]-	α-Hydroxycinnamic Acid*	Phenolic acids	Phenolic acids	5801-57-0	2	6.03709e+06	5.00536e+06	2.59583e+06	1.00266e+06	2775120	1.31313e+06	1.45151e+06	1929655	1.42608e+06	929695	398807	911245	286664	628055	1.14146e+06	2544200	2.54714e+06	2.57257e+06	C02763	ko00360,ko01100
Walp007190	362.33	300.29	361.319	C20H43NO4	[M+H]+	2-AminoicoSane-1,5,7,19-tetraol	Lipids	Sphingolipids	-	3	5.11917e+06	5.2328e+06	5.56847e+06	5.60286e+06	4.5453e+06	4.59195e+06	4.53258e+06	3.88361e+06	4.38807e+06	4.27426e+06	3.84057e+06	4.13793e+06	1.09517e+07	4.19519e+06	4.173e+06	6.59759e+06	6.65431e+06	6.67668e+06	-	-
Zmhn001926	299.08	137.02	300.084	C13H16O8	[M-H]-	1-O-Salicyloyl-β-D-glucose	Phenolic acids	Phenolic acids	60517-74-0	1	1.70325e+07	2.34769e+07	2.5008e+07	3.85697e+06	3.38088e+06	4.63314e+06	5533.76	12510.9	5480.65	8980.67	11314.1	14215.7	6061.27	5824.59	11167.2	4.64794e+06	4.60479e+06	4.59322e+06	-	-
Lmbn007891	313.24	183.14	314.246	C18H34O4	[M-H]-	Hydroxy ricinoleic acid	Lipids	Free fatty acids	-	2	1.13483e+07	9.8098e+06	1.00241e+07	5.64057e+06	9.85335e+06	1.09304e+07	1.06435e+07	1.28876e+07	9.37572e+06	1.65811e+07	1.83705e+07	1.71435e+07	2.4453e+07	2.1092e+07	2.55165e+07	1.67909e+07	1.65795e+07	1.66396e+07	-	-
mws4113	353.14	295.06	354.147	C21H22O5	[M-H]-	3'-Hydroxy-4'-O-methylglabridin	Flavonoids	Other Flavonoids	175554-11-7	2	16063.5	14829.2	18636.6	12769.7	7356.84	5814.57	422491	142354	483618	2.02321e+06	1.75823e+06	1.73495e+06	2.11227e+06	1.28007e+06	1.10399e+06	1.01924e+06	1.00984e+06	1.02282e+06	-	-
Zmyn002919	135.04	91.05	136.052	C8H8O2	[M-H]-	2-Methylbenzoic acid	Phenolic acids	Phenolic acids	118-90-1	3	105378	99108.7	18042.3	6810.28	6095.5	5641.21	9907.62	8772.63	17352	98361.9	100880	108791	124322	119442	240167	89093.3	88072.3	89117.7	C07215	ko01100
Lmmn000774	343.1	181.05	344.111	C15H20O9	[M-H]-	Dihydrocaffeoylglucose	Phenolic acids	Phenolic acids	-	3	1.30248e+06	1.03562e+06	2.29279e+06	1.22322e+07	8.61188e+06	1.11398e+07	183020	45811.9	164708	121520	38678.5	130231	74249.2	118430	122942	2.27527e+06	2.24863e+06	2.2488e+06	-	-
mws0237	187.1	125.1	188.105	C9H16O4	[M-H]-	Azelaic acid	Organic acids	Organic acids	123-99-9	1	1.48672e+06	1.74675e+06	786364	762198	1.02699e+06	765861	1.55933e+06	2.562e+06	1.50529e+06	2.16789e+06	2.37295e+06	1.97172e+06	3.06856e+06	2.81433e+06	2734823	1.88856e+06	1.86765e+06	1.86529e+06	C08261	-
Zbzn008048	293.18	221.15	294.183	C17H26O4	[M-H]-	Embelin	Quinones	Quinones	550-24-3	1	9.26496e+06	8.59673e+06	9.8685e+06	9.45269e+06	1.11552e+07	9.73748e+06	1.06016e+07	9.48626e+06	1.07497e+07	9.66638e+06	9.70485e+06	1.59976e+07	8.87562e+06	8.85726e+06	9.39598e+06	1.49799e+07	1.48258e+07	1.47835e+07	-	-
pmn001684	225.11	147.08	226.12	C12H18O4	[M-H]-	Tuberonic Acid	Organic acids	Organic acids	124649-26-9	1	243469	234021	171904	138947	122732	92534.5	251877	270422	289051	510762	433964	454534	417332	432905	474015	332577	336720	332639	-	-
Zbfn003303	337.09	163.04	338.1	C16H18O8	[M-H]-	3-(Hydroxycinnamoyl)-quinic acid*	Phenolic acids	Phenolic acids	-	2	97887	207345	1.02975e+06	1.88407e+06	1.06348e+06	2.28555e+06	969596	661294	1.03249e+06	1.26334e+06	712240	406642	89913	54958.9	249508	716608	721676	711388	-	-
MWS201478	253.12	120.09	252.111	C12H16N2O4	[M+H]+	Phe-Ser	Amino acids and derivatives	Amino acids and derivatives	16053-39-7	2	2.14782e+06	1.66495e+06	6.85128e+06	128153	1.22138e+06	103095	2.7447e+06	2.03554e+06	1.47844e+06	1.81312e+06	1.82987e+06	2.88339e+06	1.43344e+06	927840	1.27019e+06	1.98168e+06	1.97219e+06	2.00028e+06	-	-
Lmhn004976	299.06	284.02	300.063	C16H12O6	[M-H]-	Aracarpene 2	Flavonoids	Isoflavones	-	3	1.48136e+06	1.59904e+06	1.56418e+06	607062	639012	708518	846487	801835	688523	9.45467e+06	8.53969e+06	8.65526e+06	1.23055e+07	1.06693e+07	1.10619e+07	7.87705e+06	7.8045e+06	7.76252e+06	-	-
MWSHC2028	231.11	158.1	230.106	C13H14N2O2	[M+H]+	(1S,3S)-1-Methyl-1,2,3,4-tetrahydro-β-carboline-3-carboxylic acid	Alkaloids	Alkaloids	40678-46-4	1	219196	230872	439244	426444	944202	349136	1.51548e+08	4.47347e+06	1.54331e+08	1.88228e+07	1.66597e+07	2.15963e+07	1.58497e+07	1.37484e+07	1.4915e+07	3.0311e+07	2.98871e+07	3.02226e+07	-	-
Zbqp000579	156.08	110.07	155.07	C6H9N3O2	[M+H]+	2-amino-3-(1H-pyrazol-1-yl)propanoic acid	Organic acids	Organic acids	2734-48-7	1	2.91837e+07	3.25058e+07	3.73507e+07	2.39454e+07	1.51383e+07	7.30648e+06	1.41541e+07	1.08184e+06	1.50168e+07	3.93695e+07	3.79075e+07	3.62483e+07	5.33771e+07	4.90773e+07	5.60968e+07	4.20975e+07	4.21361e+07	4.15755e+07	-	-
mws0064	287.06	135.05	288.063	C15H12O6	[M-H]-	Eriodictyol (5,7,3',4'-Tetrahydroxyflavanone)	Flavonoids	Flavanones	552-58-9	2	918970	895376	1.44425e+06	1.23367e+06	299813	856711	7.22482e+06	5.08479e+06	1.25439e+07	8.0679e+06	7.44636e+06	9.4186e+06	6.72359e+06	5.89754e+06	5.64693e+06	5.2035e+06	5.27016e+06	5.27398e+06	C05631	ko00941,ko01100,ko01110
Lmdp007826	345.1	297.03	344.09	C18H16O7	[M+H]+	5,6-Dihydroxy-7,3',4'-Trimethoxyflavone	Flavonoids	Flavones	-	1	38403.1	52789.8	54046.6	3.00959e+07	3.66772e+07	4.58061e+07	3.76475e+07	4.67871e+07	3.40324e+07	1.54338e+07	1.59964e+07	1.40955e+07	9.55592e+06	1.06314e+07	8.89581e+06	1.59595e+07	1.6096e+07	1.6204e+07	-	-
pmb0608	549.12	301.07	548.117	C25H24O14	[M+H]+	Chrysoeriol-7-O-(6''-malonyl)glucoside	Flavonoids	Flavones	-	1	1.34924e+07	1.73533e+07	36580123	6.34019e+06	6.07799e+06	8.66094e+06	120558	134657	153506	88450.1	63423	65020	95801.5	63348.7	87786.5	5.10018e+06	5.11189e+06	5.17668e+06	-	-
pme3034	131.03	87.05	132.042	C5H8O4	[M-H]-	Ethylmalonic acid*	Organic acids	Organic acids	601-75-2	2	783828	1.60123e+06	796671	443928	677666	483900	686534	919081	663982	859334	1.00889e+06	854762	1.28521e+06	1.23786e+06	1.1441e+06	944742	942392	930611	-	-
pmn001689	311.22	223.17	312.23	C18H32O4	[M-H]-	9-Hydroxy-12-oxo-15(Z)-octadecenoic acid	Lipids	Free fatty acids	-	3	1.21697e+07	1.22671e+07	1.34473e+07	772083	1.03678e+06	1.7564e+06	1.77937e+06	1.2932e+06	1.64086e+06	9.39704e+06	9.2869e+06	9.37284e+06	1.18442e+07	9.90745e+06	1.04952e+07	9.30073e+06	9.44193e+06	9.32338e+06	C21924	ko00592,ko01110
Zadn009075	311.22	223.17	312.23	C18H32O4	[M-H]-	Hydroperoxylinoleic acid	Lipids	Free fatty acids	34444-18-3	2	1.21697e+07	1.22671e+07	1.34473e+07	772083	1.03678e+06	1.7564e+06	1.77937e+06	1.2932e+06	1.64086e+06	9.39704e+06	9.2869e+06	9.37284e+06	1.18442e+07	9.90745e+06	1.04952e+07	9.30073e+06	9.44193e+06	9.32338e+06	-	-
HJN091	445.11	283.06	446.121	C22H22O10	[M-H]-	Prunetin-4'-O-glucoside(Prunitrin)	Flavonoids	Isoflavones	154-36-9	3	456501	829118	284692	30630.2	59483.4	22641.7	49534.1	49488.1	71407.8	1.50541e+06	1.69574e+06	1.38162e+06	2.36026e+06	1.84042e+06	2.12422e+06	1.02302e+06	1.03604e+06	1.02034e+06	-	-
Wdtp010604	383.2	267.12	382.199	C20H30O7	[M+H]+	3,4,5-trihydroxy-6-(4-octylphenoxy)oxane-2-carboxylic acid	Phenolic acids	Phenolic acids	-	1	725574	696716	639319	396831	476401	479793	500818	461472	471084	563808	538842	602866	589742	570007	525525	569872	562313	561469	-	-
Lhmp122201	269.08	253.05	268.074	C16H12O4	[M+H]+	dalbergin	Lignans and Coumarins	Coumarins	482-83-7	1	1.16933e+07	9.36261e+06	3.68423e+06	61212.2	20617.3	25005	116095	49114.2	87984	5.59522e+06	8.41096e+06	7.15661e+06	1.31699e+07	9.17479e+06	1.86852e+07	8.95296e+06	9.05803e+06	9.09618e+06	-	-
mws0014	193.05	134.04	194.058	C10H10O4	[M-H]-	Ferulic acid*	Phenolic acids	Phenolic acids	537-98-4	2	2.54264e+07	1.75763e+07	2.92316e+07	940979	1.98442e+06	1.59667e+06	5.72687e+06	1.45673e+07	5.56239e+06	1.19841e+07	9.45618e+06	2.12657e+07	6.18362e+06	10780110	1.76891e+07	1.74573e+07	1.75884e+07	1.77517e+07	C01494	ko00940,ko01100,ko01110
Wasn006047	431.23	251.17	432.236	C21H36O9	[M-H]-	Glucosyl 10,11-dihydroxy-2,6-farneSadienoate	Others	Others	-	2	1.96103e+06	2.20234e+06	1.59124e+06	2.85969e+07	2.4219e+07	2.87626e+07	82593.3	138601	73158.6	28337.9	65839.4	56538.1	28157.6	44536.3	25840.4	5.11085e+06	5.05447e+06	5.13862e+06	-	-
Zmhn000563	343.1	197.05	344.111	C15H20O9	[M-H]-	Syringic acid 4-O-rhamnoside	Lignans and Coumarins	Lignans	-	3	284572	182524	248632	308257	1.295e+06	3.05373e+06	916363	916223	1.21746e+06	170219	484737	494923	187093	46273.9	255839	521570	530412	526777	-	-
Hmsp000364	144.1	98.09	143.095	C7H13NO2	[M+H]+	L-Cyclopentylglycine	Amino acids and derivatives	Amino acids and derivatives	2521-84-8	2	5.89011e+07	5.91494e+07	5.36748e+07	1.55001e+06	2.51938e+06	1.6654e+06	728180	600690	766897	1.65609e+07	1.63236e+07	1.48553e+07	2.31025e+07	1.99785e+07	1.98464e+07	1.75012e+07	1.72067e+07	1.73442e+07	-	-
zjbp111605	235.17	133.1	234.162	C15H22O2	[M+H]+	(5S,7S,9S,10S)-(+)-9-hydroxyselina-3,11-dien-12-al	Terpenoids	Sesquiterpenoids	-	3	257221	300188	294269	861500	8.19339e+06	923867	1.8308e+06	2.0474e+06	1.90937e+06	875452	782413	650581	602503	692317	521690	1.11359e+06	1.11561e+06	1.09812e+06	-	-
Zmgn001448	175.06	115.04	176.069	C7H12O5	[M-H]-	2-Propylmalic Acid	Organic acids	Organic acids	-	1	1.51238e+07	2.14494e+07	8.82311e+06	3.26938e+07	7.29633e+07	3.20334e+07	4.00396e+07	4.39441e+07	4.13492e+07	2.65186e+07	3.05787e+07	2.85888e+07	2.62535e+07	2.81035e+07	2.29452e+07	2.68427e+07	2.63833e+07	2.66123e+07	C05994	ko00620
Lmgn007652	329.23	211.13	330.241	C18H34O5	[M-H]-	Tianshic acid	Organic acids	Organic acids	-	2	1.00191e+07	8.53473e+06	9.30928e+06	1.08149e+07	2.15206e+07	1.13801e+07	1.82031e+06	4.98899e+06	2.03617e+06	1.92611e+06	1.90426e+06	2.19084e+06	2.43062e+06	2.35935e+06	3.01197e+06	5.11202e+06	5.04999e+06	5.13578e+06	-	-
MWS201465	295.13	120.08	294.122	C14H18N2O5	[M+H]+	Glu-Phe	Amino acids and derivatives	Amino acids and derivatives	20556-22-3	1	1.49685e+07	1.29525e+07	2.33833e+07	492744	2.98819e+06	584454	4.1446e+06	3.49575e+06	2.88407e+06	2.9568e+06	3.03343e+06	4.40587e+06	3.57011e+06	2.6158e+06	2.8761e+06	5.57579e+06	5.48328e+06	5.505e+06	-	-
pme0243	131.035	87.0452	132.042	C5H8O4	[M-H]-	Glutaric acid*	Organic acids	Organic acids	110-94-1	2	7.87069e+06	1.282e+07	5.88153e+06	3.22782e+06	5.65932e+06	3.78284e+06	5.47619e+06	7.48847e+06	5.51528e+06	7.12868e+06	7.71835e+06	6.82404e+06	1.01587e+07	9.95765e+06	9.33352e+06	7.43284e+06	7.4783e+06	7.34974e+06	C00489	ko00071,ko00310,ko01100
Zbfn002690	299.08	93.03	300.084	C13H16O8	[M-H]-	1-(4-Hydroxybenzoyl)Glucose; 25545-07-7	Phenolic acids	Phenolic acids	-	1	1.01634e+08	1.29797e+08	1.42632e+08	1.88163e+07	1.58906e+07	2.36831e+07	48180.7	87527.1	45191.3	54510.9	65787.7	83378.9	45637.4	36341.1	64905.6	2.4667e+07	2.43382e+07	2.42587e+07	-	-
pmb0764	144.05	113.03	143.041	C6H9NOS	[M+H]+	4-Methyl-5-thiazoleethanol	Others	Others	137-00-8	3	1.28849e+06	886240	468654	768622	957140	1.1373e+06	885980	754260	901505	464581	189673	781202	1.35182e+06	573731	1.3067e+06	1.27966e+06	1.27453e+06	1.25802e+06	C04294	ko00730,ko01100,ko01240
Hmln008119	197.12	153.12	198.126	C11H18O3	[M-H]-	Robinlin	Terpenoids	Terpene	-	1	274748	222828	350791	276720	333031	362018	529675	487626	530159	1.06307e+06	1.14503e+06	1.04384e+06	1.26683e+06	1.07785e+06	1.12213e+06	729637	742753	735159	-	-
HJN090	433.11	271.06	434.121	C21H22O10	[M-H]-	Butin-7-O-glucoside*	Flavonoids	Flavanones	-	3	1.40819e+06	894579	942809	579303	302196	507207	14409.5	15516.4	59220	92813.6	93022.4	68512	73411	73489.7	104018	495825	504781	498996	-	-
Lazn003560	469.17	195.07	470.179	C22H30O11	[M-H]-	Methoxy-erythro-Guaiacyl glycerol β-threo-syringyl glycerol ether	Lignans and Coumarins	Lignans	-	2	371024	286847	499696	445356	422897	370329	1.65797e+06	1.30294e+06	1.70087e+06	1.6278e+06	1.3228e+06	1.50227e+06	979300	989886	873708	854308	842297	839736	-	-
Wayn002532	301.06	168.01	302.064	C12H14O9	[M-H]-	Gallic acid-1-O-xyloside	Tannins	Tannin	-	1	3.22962e+07	6.54805e+07	1.15849e+08	575769	624230	1.80165e+06	32516.2	21675	52440.3	108263	174271	205933	149779	98778.5	125628	1.17114e+07	1.19161e+07	1.18833e+07	-	-
Lmmp004269	815.17	287.05	814.159	C37H34O21	[M+H]+	Luteolin-7-O-glucuronide-(2→1)-(2''-Feruloyl)glucuronide	Flavonoids	Flavones	-	2	5.19543e+06	8761640	1.0585e+07	63739.4	21710.5	11084.4	8340	6661.44	6670	2394975	963250	846207	314189	623030	782145	4238845	4247430	4175340	-	-
pme2266	245.1	227.08	244.088	C10H16N2O3S	[M+H]+	Biotin	Others	Vitamin	58-85-5	3	1.39034e+06	1.35514e+06	1.4034e+06	1.02581e+06	770444	821706	1.32756e+06	1.00515e+06	1.42079e+06	1.76834e+06	1.90641e+06	1.89977e+06	3.43888e+06	3.09977e+06	3.14455e+06	1.78645e+06	1.76199e+06	1.75472e+06	C00120	ko00780,ko01100,ko01240,ko02010
Lstp211202	247.13	229.08	246.126	C15H18O3	[M+H]+	Ligudentatin A	Others	Others	-	3	696509	674536	679333	257775	608578	500100	492779	422115	1.01985e+06	569024	609106	596032	519709	583073	630029	632478	643675	634290	-	-
Laxp008852	299.09	284.07	298.084	C17H14O5	[M+H]+	(2Z)-2-(3,4-Dimethoxybenzylidene)-6-Hydroxy-1-Benzofuran-3(2H)-One	Flavonoids	Other Flavonoids	1322574-14-0	1	1.93067e+07	2.05957e+07	1.48753e+07	147480	111273	109621	205810	236001	152872	2.62205e+07	3.38173e+07	2.63649e+07	4.72005e+07	3.7964e+07	4.65428e+07	2.20181e+07	2.2105e+07	2.24179e+07	-	-
MWS1900	215.13	153.13	216.136	C11H20O4	[M-H]-	Undecanedioic acid	Lipids	Free fatty acids	1852-04-6	2	2.75466e+06	2.73645e+06	1.66244e+06	1.87617e+06	2.76167e+06	2.57558e+06	9.72547e+06	1.90069e+07	9.32533e+06	8.41972e+06	9.11272e+06	8.23235e+06	1.05568e+07	9.61672e+06	8.81814e+06	6.8178e+06	6.94824e+06	6.87435e+06	-	-
Lmhn002437	153.02	109.03	154.027	C7H6O4	[M-H]-	Terreic acid	Others	Ketone compounds	121-40-4	1	8.48231e+06	7.84552e+06	5.74046e+06	1.38618e+07	1.84605e+07	1.68982e+07	8.69782e+07	8.94533e+07	106613272	2.25955e+07	2.01642e+07	2.84946e+07	1.33287e+07	1.21703e+07	1.40715e+07	2.90401e+07	2.90437e+07	2.95245e+07	-	-
MWS4296	223.11	120.08	222.1	C11H14N2O3	[M+H]+	Glycylphenylalanine*	Amino acids and derivatives	Amino acids and derivatives	3321-03-7	1	1.6005e+07	9.39406e+06	4.12334e+07	649960	5.50353e+06	724012	4.77138e+06	7.95692e+06	5.12579e+06	6.62882e+06	6.11951e+06	1.01234e+07	5.89361e+06	3.86378e+06	6.48939e+06	9.56252e+06	9.39024e+06	9.52553e+06	-	-
Lmhp002001	265.15	72.08	264.147	C14H20N2O3	[M+H]+	L-Valyl-L-Phenylalanine	Amino acids and derivatives	Amino acids and derivatives	3918-92-1	2	7.49643e+06	3.67168e+06	2.09949e+07	274726	1.98398e+06	206903	6.19865e+06	2.35361e+06	4.44079e+06	1.02386e+07	8.83682e+06	1.10486e+07	6.83062e+06	6.11692e+06	7.65655e+06	1.2537e+07	1.23356e+07	1.25468e+07	-	-
pme3233	285.08	270.05	284.068	C16H12O5	[M+H]+	Calycosin	Flavonoids	Isoflavones	20575-57-9	1	1.28665e+07	1.0123e+07	6.00605e+06	1.42248e+06	1171470	1.9873e+06	2.12311e+06	2.07666e+06	1188275	1.55708e+07	1.82537e+07	1.66908e+07	3.96511e+07	2.96235e+07	4.04773e+07	1.83995e+07	1.83738e+07	1.86919e+07	C01562	ko00943,ko01110
mws0752	185.15	185.16	186.162	C11H22O2	[M-H]-	Undecylic Acid	Lipids	Free fatty acids	112-37-8	2	4.22523e+06	4.54291e+06	4.21736e+06	4.60968e+06	4.75033e+06	4.72896e+06	5.3804e+06	6.17059e+06	5.28793e+06	7.01108e+06	7.12174e+06	6.58478e+06	9.04895e+06	7.44575e+06	7.3659e+06	6.77391e+06	6.77169e+06	6.66045e+06	C17715	-
Lakn002165	447.12	152.01	448.122	C18H24O13	[M-H]-	Protocatechuic acid glucosyl xyloside	Phenolic acids	Phenolic acids	-	2	1.86263e+06	2.01019e+06	3.52763e+06	1.943e+06	3.56523e+06	4.83784e+06	199833	71668	119348	311010	260825	401491	289561	108219	291780	810091	802568	818233	-	-
pmn001694	329.23	229.15	330.241	C18H34O5	[M-H]-	9,10,13-Trihydroxy-11-Octadecenoic Acid	Lipids	Free fatty acids	29907-57-1	3	6.13384e+07	5.3171e+07	5.50453e+07	6.07773e+07	1.26418e+08	6.89692e+07	2.37392e+07	3.94889e+07	2.47668e+07	2.84708e+07	3.3585e+07	2.58673e+07	3.23812e+07	2.73007e+07	2.94076e+07	3.87872e+07	3.89057e+07	3.82017e+07	C14835	ko00591
Lmbn000193	103.004	59.0139	104.011	C3H4O4	[M-H]-	Tartronate semialdehyde	Organic acids	Organic acids	2480-77-5	3	3.11337e+07	3.58913e+07	3.15052e+07	2.8952e+06	5.63459e+06	3.54318e+06	392318	636016	228410	142153	130554	226879	303678	291929	516612	5.48866e+06	5.41196e+06	5.38672e+06	C01146	ko00053,ko00630,ko01100
Zahn005590	359.15	329.14	360.157	C20H24O6	[M-H]-	(7'S,8R,8'R)-3,5'-dimethoxy-3',4,9'-trihydroxy-7',9-epoxy-8,8'-lignan	Lignans and Coumarins	Lignans	-	1	42961.1	61879.2	86041.4	229307	303386	361080	1.43212e+06	576546	1.4058e+06	458777	709011	691685	385116	560574	489411	399123	392030	398595	-	-
pmb2871	315.07	153.02	316.079	C13H16O9	[M-H]-	1-O-Gentisoyl-β-D-glucoside*	Phenolic acids	Phenolic acids	23445-11-6	1	5.46368e+06	3.65444e+06	1.15568e+07	6.67549e+07	6.37541e+07	8.79971e+07	254346	185689	246560	304996	310026	464237	279991	90697.1	361412	1.33689e+07	1.33422e+07	1.35873e+07	-	-
mws1068	285.04	151	286.048	C15H10O6	[M-H]-	Kaempferol (3,5,7,4'-Tetrahydroxyflavone)	Flavonoids	Flavonols	520-18-3	1	679134	384492	1.22709e+06	50608.8	34028.9	89183	2.10988e+06	223976	682189	1.38888e+07	7.25433e+06	6.06933e+06	3.3255e+06	2.8327e+06	2.59573e+06	2.70304e+06	2.74411e+06	2.75495e+06	C05903	ko00941,ko00944,ko01100,ko01110
MWS2430	241.22	241.21	242.225	C15H30O2	[M-H]-	13-methylmyristic acid	Lipids	Free fatty acids	2485-71-4	2	1.9693e+06	1.95543e+06	1.51275e+06	950835	1.31317e+06	1.04851e+06	1.61766e+06	1.26294e+06	1.79106e+06	2.35801e+06	2.87685e+06	2.2334e+06	2.84007e+06	2.60083e+06	3.99691e+06	3.63281e+06	3.70426e+06	3.68536e+06	-	-
pmf0314	289.25	157.16	290.261	C20H34O	[M-H]-	cis-Abienol	Terpenoids	Ditepenoids	17990-16-8	3	27939.6	28351.6	27579.2	62349.2	61300.3	69326.2	93292.1	64491.7	68965.3	55217.3	51081.8	58225.3	72688.5	45601.1	54667.5	59001.2	58316.4	57825.8	-	-
MWSmce415	315.09	282.06	314.079	C17H14O6	[M+H]+	Cirsimaritin (4',5-dihydroxy-6,7-dimethoxyflavone)*	Flavonoids	Flavones	6601-62-3	2	189653	265354	293588	3.36511e+06	3.94752e+06	4.65642e+06	4.13542e+06	4.70359e+06	3.82111e+06	1.75067e+06	1.80059e+06	2.97579e+06	1.37399e+06	1.28924e+06	1.36356e+06	1.83278e+06	1.80177e+06	1.79957e+06	C17785	-
pmn001571	313.11	298.08	314.115	C18H18O5	[M-H]-	Agrimonolide	Lignans and Coumarins	Coumarins	21499-24-1	3	8.81943e+06	5.86815e+06	1.05028e+07	93832.3	54258	426917	397614	273614	250296	8.45934e+06	9.38979e+06	5.23127e+06	1.55217e+07	1.02972e+07	2.37841e+07	1.2177e+07	1.20349e+07	1.19256e+07	-	-
ML10174588	233.16	233.16	234.162	C15H22O2	[M-H]-	Confertifoline	Terpenoids	Sesquiterpenoids	1811-23-0	2	1.93215e+07	1.84732e+07	1.98856e+07	2.49333e+07	2.52276e+07	2.55706e+07	2.29837e+07	1.91217e+07	2.21417e+07	1.80472e+07	1.73696e+07	1.94979e+07	1.57978e+07	1.58204e+07	1.79209e+07	1.6754e+07	1.70993e+07	1.68588e+07	C09376	-
Wbmn010746	377.23	295.23	378.241	C22H34O5	[M-H]-	Negundoin A	Terpenoids	Ditepenoids	-	1	1.20723e+06	1.06666e+06	51993.5	532076	22624	426290	1.41782e+06	498988	3.62858e+07	1.39185e+08	1.25419e+08	3.44202e+06	1.49237e+08	108342595	1.54386e+08	7.69827e+07	7.72027e+07	7.84885e+07	-	-
Lmhn007973	631.38	631.39	632.392	C36H56O9	[M-H]-	Quinovic acid-3-O-rhamnoside	Terpenoids	Triterpene	104055-76-7	2	7.13656e+06	1.4888e+07	3.26286e+06	87085.6	76065.8	92107.1	204453	277345	197869	1.79324e+07	1.94509e+07	1.62596e+07	3.77511e+07	2.91593e+07	2.51805e+07	1.56935e+07	1.56419e+07	1.59506e+07	-	-
mws0905	269.08	209.06	270.089	C16H14O4	[M-H]-	Medicarpin	Flavonoids	Isoflavones	32383-76-9	1	2.76974e+06	2.09162e+06	1.60567e+06	16092.9	10163.6	16129.5	33956.5	23584.7	25352.1	872458	1.23731e+06	886880	2.38511e+06	2.37946e+06	2.61339e+06	1.6014e+06	1.58348e+06	1.56815e+06	C10503	ko00943,ko01100,ko01110
pme1654	209.12	59.02	210.126	C12H18O3	[M-H]-	Jasmonic acid	Organic acids	Organic acids	77026-92-7	3	3.09932e+06	4.38679e+06	2.66183e+06	5.69734e+06	4.4189e+06	2.2084e+06	3.74574e+06	3.43444e+06	3.03907e+06	1.99978e+06	2.1263e+06	2.19986e+06	1.84319e+06	1.8904e+06	1.81722e+06	2.16016e+06	2.14446e+06	2.11568e+06	C08491	ko00592,ko01100,ko01110,ko04075
Yacn003968	206.08	147.04	207.089	C11H13NO3	[M-H]-	Cantleyine	Alkaloids	Alkaloids	30333-81-4	1	3.69643e+07	5.50564e+07	3.49135e+07	2.63263e+06	2.94411e+06	2.31743e+06	1.03195e+06	1.00387e+06	928364	1.26458e+07	1.46786e+07	11922952	2.28099e+07	2.10015e+07	1.86377e+07	1.74821e+07	1.77594e+07	1.74079e+07	C09933	-
Zbqn006635	267.03	195.04	268.037	C15H8O5	[M-H]-	2-Acetoxy-4-hydroxyanthraquinone	Quinones	Anthraquinone	-	3	1.36361e+06	1.02521e+06	393595	42336.7	54662	12980.8	51013.3	65158.1	76331.8	898816	1.06577e+06	1.04043e+06	1.45974e+06	1.17004e+06	2.42495e+06	1.26745e+06	1.26112e+06	1.2873e+06	-	-
Wbmn011269	377.23	295.23	378.241	C22H34O5	[M-H]-	Vitexilactone	Terpenoids	Ditepenoids	61263-49-8	1	2.37073e+06	2.52299e+06	525869	524611	560403	428690	4.97594e+07	1.85168e+07	3.7776e+07	1.45637e+08	1.22429e+08	122280642	1.49049e+08	1.06562e+08	1.50933e+08	7.84335e+07	7.77826e+07	7.94566e+07	-	-
Labn002602	477.12	153.02	478.132	C19H26O14	[M-H]-	chinenionside B	Phenolic acids	Phenolic acids	-	3	746275	777287	669518	47772.1	98685.6	79432.9	1.27078e+06	14795.9	1.36505e+06	640842	691866	751168	371331	434679	391367	639395	652712	642720	-	-
MWS1983	343.12	89.03	344.132	C12H24O11	[M-H]-	Maltitol	Others	Saccharides	585-88-6	3	2.19338e+06	2.16201e+06	2.02912e+06	1.59786e+06	1.37068e+06	1.13246e+06	627201	437965	426159	259181	280723	276886	324300	233362	284545	2.00873e+06	1.99743e+06	2.03964e+06	-	-
pmb2406	510.36	184.07	509.348	C25H52NO7P	[M+H]+	LysoPC 17:0*	Lipids	LPC	50930-23-9	2	1.94813e+06	2.42385e+06	3.64292e+06	1.55343e+06	1.26821e+06	1.11127e+06	49631.4	64494.3	93475.4	48210.9	76411.7	43793	25614.1	5228.21	52967.7	884505	901972	900749	-	-
pme1598	463.12	301.07	464.132	C22H24O11	[M-H]-	Hesperetin-5-O-glucoside	Flavonoids	Flavanones	69651-80-5	3	2.11292e+06	1.07981e+06	9.04729e+06	1.60626e+06	7.13587e+06	7.61379e+06	2.51647e+06	509405	1.47124e+06	442263	259692	471103	237320	83199.2	159007	2.6676e+06	2.62791e+06	2.61124e+06	-	-
mws1189	193.04	72.99	194.043	C6H10O7	[M-H]-	D-Galacturonic acid*	Others	Saccharides	685-73-4	1	9.86038e+06	7.96727e+06	1.41054e+07	659871	881959	525975	1.98842e+06	165784	1.07486e+06	7.02249e+06	5.97397e+06	6.49567e+06	6.72256e+06	6.33291e+06	7.60432e+06	1.11536e+07	1.09097e+07	1.10359e+07	C00333	ko00040,ko00053,ko00520,ko01100,ko01240,ko01250,ko02010
Zmhn001793	341.09	179.03	342.095	C15H18O9	[M-H]-	6-O-Caffeoyl-D-glucose*	Phenolic acids	Phenolic acids	-	1	6.72575e+06	7.63194e+06	1.15529e+07	7.86401e+07	2.31959e+07	5.69716e+07	598034	339256	607972	272192	300525	367046	242071	402154	2.17278e+06	1.25284e+07	1.28075e+07	1.26464e+07	-	-
mws1715	252.11	136.06	251.102	C10H13N5O3	[M+H]+	Cordycepin (3'-Deoxyadenosine)*	Nucleotides and derivatives	Nucleotides and derivatives	73-03-0	2	2.50381e+06	2.0213e+06	2.41242e+06	702180	1.15832e+06	1.18321e+06	967983	866621	912619	6.73046e+06	5.43834e+06	6.27271e+06	3.87893e+06	3.761e+06	4.22279e+06	3.05525e+06	3.09101e+06	3.02295e+06	C08431	-
pme2827	239.24	223.24	240.245	C16H32O	[M-H]-	Palmitaldehyde	Lipids	Free fatty acids	629-80-1	3	4.34315e+06	4.6309e+06	1.60974e+06	2.00802e+06	1.95763e+06	3.76087e+06	4.34697e+06	2.84693e+06	4.17624e+06	2.87881e+06	2.77554e+06	3.03976e+06	2.29964e+06	2.25967e+06	2.39131e+06	2.20284e+06	2.25292e+06	2.22943e+06	C00517	ko00071
ZbWn002006	158.08	116.08	159.089	C7H13NO3	[M-H]-	N-acetylvaline	Amino acids and derivatives	Amino acids and derivatives	-	2	1.42588e+06	1.9372e+06	2.07798e+06	2.52496e+06	3.4407e+06	1.72367e+06	890888	385349	903443	868779	795752	886925	873089	684302	856257	1.70757e+06	1.69943e+06	1.73648e+06	-	-
WaYn002719	409.15	165.06	410.158	C20H26O9	[M-H]-	8,8''-Bisguaiacylglycerol*	Lignans and Coumarins	Lignans	-	1	429549	437491	826911	5.58859e+06	2.15229e+06	2.82398e+06	8.21894e+06	7.90607e+06	9.01006e+06	3.8854e+06	4.00746e+06	4.25371e+06	2.7812e+06	2.7389e+06	2.54468e+06	3.14853e+06	3.19687e+06	3125210	-	-
Lmbn005662	295.23	171.1	296.235	C18H32O3	[M-H]-	9(10)-EpOME;(9R,10S)-(12Z)-9,10-Epoxyoctadecenoic acid	Lipids	Free fatty acids	16833-56-0	3	4.56922e+06	5.72908e+06	2.00999e+06	1.42927e+07	2.5838e+07	7.37055e+06	3.64057e+06	1.02681e+07	4.29636e+06	1.72966e+06	1.76393e+06	1.89429e+06	1.26238e+06	1.46178e+06	1.77311e+06	4.75967e+06	4.75718e+06	4.8546e+06	C14825	ko00591,ko01100
Layp007325	257.08	137.02	256.074	C15H12O4	[M+H]+	Bauhinoxepin J	Others	Alcohol compounds	942513-05-5	3	4.04875e+07	4.24084e+07	1.97446e+07	1.75984e+06	1.43183e+06	1.689e+06	1.67226e+06	1.51672e+06	1.17499e+06	2.02141e+07	2.71186e+07	2.68519e+07	2.80207e+07	2.67601e+07	33848974	2.6067e+07	2.54906e+07	2.56148e+07	-	-
Hahn001280	211.06	148.02	212.069	C10H12O5	[M-H]-	piscrocin C	Others	Others	-	1	1.02642e+06	764022	682690	3.04687e+06	3.57334e+06	3.54697e+06	9.78701e+06	1.54118e+07	9.62245e+06	3.75e+06	3.11579e+06	4.73051e+06	1.70448e+06	2.06584e+06	1.93481e+06	3.15291e+06	3.21951e+06	3.15615e+06	-	-
Zmjn004133	311.22	293.21	312.23	C18H32O4	[M-H]-	9S-Hydroperoxy-10E,12Z-octadecadienoic acid	Lipids	Free fatty acids	5502-91-0	3	3.83629e+06	3.883e+06	3.89171e+06	2.01525e+06	3.6843e+06	2.31678e+06	3.6222e+06	1.26737e+07	3.44607e+06	5.33051e+06	4.82822e+06	4.96605e+06	4.37413e+06	5.28949e+06	4.75975e+06	5.04781e+06	4.99616e+06	4.92999e+06	C14827	ko00591,ko01100
Yacp000453	116.07	70.06	115.063	C5H9NO2	[M+H]+	3-hydroxy-1-methylpyrrolidin-2-one*	Alkaloids	Pyrrole alkaloids	132996-63-5	1	6.7904e+06	3.8365e+06	9.34426e+06	9.5765e+06	9.78712e+06	6.13599e+06	2.58967e+06	1.58068e+06	2.42055e+06	3.37379e+06	3.52309e+06	3.23022e+06	3.63713e+06	3.20436e+06	4.0095e+06	3.69678e+06	3.60967e+06	3.65895e+06	-	-
pmb3031	403.1	313.1	404.111	C20H20O9	[M-H]-	Tricin-4'-O-glycerol	Flavonoids	Flavones	-	3	221031	196058	45859.5	28361.5	28046.9	50901.6	94320.7	61418.5	29994	770313	706157	481038	804372	850206	813533	420183	419361	411120	-	-
Wbsp001938	220.12	90.06	219.111	C9H17NO5	[M+H]+	Casuarine Analogue	Alkaloids	Alkaloids	-	1	1.52355e+07	1.74476e+07	1.49137e+07	5.33217e+06	1.16529e+07	6.306e+06	5.66173e+06	6.33253e+06	5.87364e+06	1.3414e+07	1.29294e+07	1.32324e+07	1.54316e+07	1.51387e+07	1.43871e+07	1.23561e+07	1.23683e+07	1.26251e+07	-	-
pmb2893	291.15	119.05	292.154	C14H20N4O3	[M-H]-	N-p-Coumaroylhydroxyagmatine	Alkaloids	Phenolamine	-	3	54361.6	43345	69618.6	17131.7	32973.6	21973.5	289844	169460	270934	521767	392662	539536	214441	203032	234023	270404	274956	268499	-	-
mws5042	223.11	120.09	222.1	C11H14N2O3	[M+H]+	L-Glycyl-L-phenylalanine*	Amino acids and derivatives	Amino acids and derivatives	721-66-4	1	1.92944e+07	1.10727e+07	5.17343e+07	863831	6.72592e+06	887125	5.43139e+06	7.86344e+06	5.37878e+06	7.60893e+06	7.15735e+06	9.89678e+06	5.08822e+06	4.15649e+06	6.22114e+06	9.21582e+06	9.40476e+06	9.19916e+06	-	-
mws1074	177.02	121.03	178.027	C9H6O4	[M-H]-	Daphnetin	Lignans and Coumarins	Coumarins	486-35-1	2	395253	377854	369084	170840	781010	225566	6.24014e+06	1.7427e+06	7.80094e+06	2.93873e+06	2.60925e+06	2.83916e+06	1.76272e+06	1.46635e+06	1.39352e+06	1.75279e+06	1.71008e+06	1.7308e+06	C03093	-
Qmyp101439	211.17	135.12	210.162	C13H22O2	[M+H]+	Blumenol C(ISO2)	Terpenoids	Sesquiterpenoids	-	1	1.63469e+06	2.5416e+06	1.03361e+06	986061	1.28964e+06	913765	5.77869e+06	5.47014e+06	5.89256e+06	1.11664e+07	9.73456e+06	1.25505e+07	1.10517e+07	9.57978e+06	9.28174e+06	7.41759e+06	7.40122e+06	7.25279e+06	-	-
Lmrj002087	247.13	86.09	246.122	C10H18N2O5	[M+H]+	L-Isoleucyl-L-Aspartate	Amino acids and derivatives	Amino acids and derivatives	-	2	1.0805e+07	8.46384e+06	2.51467e+07	1.0702e+06	6.81686e+06	1.30129e+06	1.9064e+06	2.60895e+06	1.5905e+06	4.61357e+06	5.0654e+06	5.08061e+06	1.15735e+06	3.25947e+06	4.03424e+06	5.40393e+06	5.34034e+06	5.27205e+06	-	-
Zmjp000966	268.11	136.06	267.097	C10H13N5O4	[M+H]+	Vidarabine	Nucleotides and derivatives	Nucleotides and derivatives	5536-17-4	3	9.28128e+07	8.82141e+07	1.09083e+08	1.90449e+07	3.1002e+07	1.83915e+07	5.36763e+06	1.19559e+07	1.14064e+07	6.03145e+06	8.22766e+06	1.26479e+07	1.21427e+07	9.40603e+06	4.08588e+07	2.39667e+07	2.45583e+07	2.41718e+07	-	-
Wcdp006912	274.28	88.08	273.267	C16H35NO2	[M+H]+	Lauryldiethanolamine	Others	Others	1541-67-9	2	1.16186e+07	1.34365e+07	1.3902e+07	1.40605e+07	1.19983e+07	1.39633e+07	1.27547e+07	1.26067e+07	1.10315e+07	1.13331e+07	1.14571e+07	1.3054e+07	2.46595e+07	11965475	1.16403e+07	2.19916e+07	2.24742e+07	2.24783e+07	-	-
Yajn011961	317.21	287.2	318.219	C20H30O3	[M-H]-	ent-17-Hydroxykaur-15-en-19-oic acid	Others	Others	35030-38-7	3	12909.8	11721	10530.9	2.85041e+07	1.16091e+07	8.44781e+06	6.8677e+06	1.10152e+07	1.68421e+07	796355	2.50667e+06	1.40125e+06	481782	2.55898e+06	1796394	5.14583e+06	5.18042e+06	5.27352e+06	-	-
mws0677	219.11	160.08	218.106	C12H14N2O2	[M+H]+	N-Acetyl-5-hydroxytryptamine	Alkaloids	Plumerane	1210-83-9	3	400458	442853	459620	267749	194225	249179	209604	41975.4	281412	538846	551880	396458	619076	466364	555804	456207	451731	444635	C00978	ko00380,ko01100,ko01110
MWS4309	262.12	188.07	261.111	C13H15N3O3	[M+H]+	Glycyl-tryptophan	Amino acids and derivatives	Amino acids and derivatives	2390-74-1	3	2.60821e+06	2.06963e+06	4.53641e+06	214798	913878	242266	908808	663077	790691	911280	911990	1.103e+06	942652	570785	1.46253e+06	1.23136e+06	1.19971e+06	1.21548e+06	-	-
Zahn006118	277.14	134.04	278.152	C16H22O4	[M-H]-	1,3-Benzodioxole-5-nonanoic acid	Others	Others	834900-22-0	3	106824	90986	94679.6	61310.7	70517	84977.2	98934.9	97961.5	103883	113016	93565.6	101519	111980	99711.9	96274.3	93426.3	91205.5	93157.2	-	-
pme3475	273.08	153.02	272.068	C15H12O5	[M+H]+	Butin; 7,3',4'-Trihydroxyflavanone*	Flavonoids	Flavanones	492-14-8	2	2.7158e+06	2.68149e+06	2.97644e+06	1.54101e+06	1.00579e+06	1.2859e+06	2.93295e+06	3.10412e+06	5.16943e+06	4.88281e+06	4.89389e+06	4.68642e+06	5.36557e+06	4.5107e+06	4.52952e+06	4.33021e+06	4.3235e+06	4.22886e+06	C09614	ko00941
mws1434	431.1	311.05	432.106	C21H20O10	[M-H]-	Apigenin-6-C-glucoside (Isovitexin)*	Flavonoids	Flavones	38953-85-4	1	4.57667e+06	2.5691e+06	1.03665e+06	77275.7	220110	363279	855521	752860	741272	1.48769e+07	7.66452e+06	1.43979e+07	7.02753e+06	1.20335e+07	8.58363e+06	4.70035e+06	4.62568e+06	4.57887e+06	C01714	ko00944
Zmtn001464	204.03	160.04	205.037	C10H7NO4	[M-H]-	4,8-Dihydroxyquinoline-2-carboxylic acid	Organic acids	Organic acids	59-00-7	2	734114	852053	1.66202e+06	529865	252322	455495	666921	415622	608300	3.16912e+06	2.45318e+06	2.21809e+06	1.86726e+06	1.53387e+06	1.78158e+06	1.3368e+06	1.332e+06	1.36496e+06	C02470	ko00380
MWS5206	181.05	135.04	182.058	C9H10O4	[M-H]-	4-Hydroxyphenyllactic Acid	Phenolic acids	Phenolic acids	306-23-0	1	226210	369121	124682	822459	2.65641e+06	1.00955e+06	3.97144e+07	1.79351e+07	4.07384e+07	2.54405e+07	25942057	2.70665e+07	1.91447e+07	2.01385e+07	2.10801e+07	1.75088e+07	1.74794e+07	1.70962e+07	C03672	-
Xmyn008071	299.06	284.03	300.063	C16H12O6	[M-H]-	Gnetifolin B*	Flavonoids	Flavones	140671-06-3	1	1.63418e+06	1.49133e+06	1.60535e+06	593629	640398	736403	902306	862932	746143	9.35394e+06	8.79339e+06	8.94016e+06	1.32969e+07	1.203e+07	1.06139e+07	7.79565e+06	7.92053e+06	8.00404e+06	-	-
mws1060	267.07	135.03	268.081	C10H12N4O5	[M-H]-	9-(Arabinosyl)hypoxanthine	Nucleotides and derivatives	Nucleotides and derivatives	7013-16-3	1	2.931e+07	2.6583e+07	4.4597e+07	2.06309e+06	1.86499e+06	1.52339e+06	1.92563e+06	2.18628e+06	2.36869e+06	644767	633201	624407	747358	560506	574254	5.77857e+06	5.66638e+06	5.63462e+06	-	-
Zmbn004194	189.08	129.06	190.084	C8H14O5	[M-H]-	(R)-2-hydroxy-2-isobutylsuccinic acid	Others	Others	-	3	1.03465e+06	1.27443e+06	593323	4.32798e+07	1.15368e+08	3.10724e+07	3.58026e+07	2.79621e+07	3.6374e+07	1.35775e+07	1.88672e+07	1.66523e+07	1.28957e+07	2.2183e+07	6.81657e+06	2.26298e+07	2.20998e+07	2.26123e+07	-	-
pmn001691	327.22	291.2	328.225	C18H32O5	[M-H]-	9,12,13-Trihydroxy-10,15-octadecadienoic acid	Lipids	Free fatty acids	-	2	4.00545e+07	3.91574e+07	3.85135e+07	6.20662e+06	2.26583e+07	7.54369e+06	4.23832e+06	1.03694e+07	4.30402e+06	1.33285e+07	1.21731e+07	1.34475e+07	1.53943e+07	1.4696e+07	1.73625e+07	1.93115e+07	1.98057e+07	1.97166e+07	-	-
Lahp004442	273.07	153.02	272.068	C15H12O5	[M+H]+	3,4-Dihydro-4-(4'-hydroxyphenyl)-5,7-dihydroxycoumarin	Lignans and Coumarins	Coumarins	-	2	2.44736e+06	2.43633e+06	2.48671e+06	1.30397e+06	917326	1.17341e+06	2.80356e+06	2.86366e+06	4.34291e+06	4.68671e+06	4.15301e+06	4.6791e+06	4.94643e+06	4.00336e+06	4.22584e+06	3.79834e+06	3.86399e+06	3.90093e+06	-	-
pmf0174	157.16	157.16	158.167	C10H22O	[M-H]-	1-Decanol*	Others	Alcohol compounds	112-30-1	3	163052	172927	153530	123593	152958	151730	165377	172956	150661	157338	163644	180276	159042	145365	151971	267876	261161	266707	C01633	-
Lmgn000219	101.02	55.02	102.032	C4H6O3	[M-H]-	Succinic semialdehyde	Organic acids	Organic acids	692-29-5	3	50735.1	64868.1	64539.4	112407	99758.5	117473	66230.2	64418	43551.8	49360.5	37454.4	47374.2	40575.2	41534.6	52103	90737.1	93138.4	91352.7	C00232	ko00250,ko00350,ko00650,ko00750,ko00760,ko01100,ko01200
pmc0281	400.15	136.06	399.139	C15H21N5O8	[M+H]+	Ribosyladenosine	Nucleotides and derivatives	Nucleotides and derivatives	-	3	3.75783e+07	2.54007e+07	2.67682e+07	3.61205e+06	1.19648e+07	1.4424e+07	1.76009e+06	1.06247e+06	1.44225e+06	7.04115e+06	8.06694e+06	9.36904e+06	5.10686e+06	3.33702e+06	3.58932e+06	8.55745e+06	8.7348e+06	8.78187e+06	-	-
MWS80006	311.22	293.21	312.23	C18H32O4	[M-H]-	9-Hydroperoxy-9Z,11E-Octadecadienoic Acid	Lipids	Free fatty acids	-	2	432980	464363	338766	215766	295597	297599	307464	681591	332835	538623	641925	636480	596328	478440	553183	463600	468136	476295	-	-
Lmmp007480	257.08	137.02	256.074	C15H12O4	[M+H]+	2,4,4'-trihydroxychalcone*	Flavonoids	Chalcones	-	1	4.35984e+07	4.16531e+07	2.07218e+07	1.69704e+06	1.3922e+06	1.76989e+06	1.7566e+06	1.50312e+06	1.23653e+06	1.92491e+07	2.58055e+07	2.58462e+07	3.01302e+07	2.76428e+07	3.59184e+07	2.69898e+07	2.64984e+07	2.62696e+07	-	-
Zmjn001030	346.06	211	347.063	C10H14N5O7P	[M-H]-	Adenosine 2'-Phosphate	Nucleotides and derivatives	Nucleotides and derivatives	130-49-4	3	26122.4	25251.4	14724.2	8820.28	9629.12	2708.71	54837.5	24207.7	47212.2	207815	210819	198946	251771	222153	192366	111951	109612	112543	C00946	-
pmb2791	309.21	209.05	310.214	C18H30O4	[M-H]-	9-Hydroperoxy-10E,12,15Z-octadecatrienoic acid	Lipids	Free fatty acids	111004-08-1	3	3.29339e+07	3.00372e+07	6.94735e+07	3.21483e+06	1.5835e+07	6.75943e+06	1.82999e+07	3.14214e+07	2.35884e+07	7.34828e+07	5.41288e+07	6.02617e+07	4.79991e+07	4.80851e+07	6.03339e+07	4.74794e+07	4.83554e+07	4.70488e+07	C16321	ko00592,ko01110
Lmjn005592	343.08	313.04	344.09	C18H16O7	[M-H]-	Cirsilineol (4',5-Dihydroxy-3',6,7-trimethoxyflavone)	Flavonoids	Flavanones	41365-32-6	1	81190.1	140600	261829	1.848e+07	2.10947e+07	2.41074e+07	2.17359e+07	2.41241e+07	1.74983e+07	8.43916e+06	8.99742e+06	8.13795e+06	5.48427e+06	6.02538e+06	5.00044e+06	9.23108e+06	8.98095e+06	9.06127e+06	C10032	-
Zmyn004732	293.21	185.12	294.219	C18H30O3	[M-H]-	2R-hydroxy-9Z,12Z,15Z-octadecatrienoic acid	Lipids	Free fatty acids	-	3	6.95561e+06	6.88367e+06	6.10192e+06	7.03995e+06	3.52425e+07	7.78608e+06	4.54745e+06	5.84548e+07	4.43383e+06	3.73707e+06	3.6337e+06	4.27663e+06	4.20484e+06	4.48825e+06	5.63111e+06	9.19202e+06	9.33098e+06	9.07e+06	C16342	ko00592
mws2368	137.06	119.05	138.068	C8H10O2	[M-H]-	Tyrosol; 4-Hydroxyphenylethanol	Phenolic acids	Phenolic acids	501-94-0	2	122092	104311	137117	97017.6	165774	224268	2.45293e+06	1.06918e+06	3.14763e+06	1.6974e+06	1.6847e+06	1.66664e+06	1.11206e+06	817687	706381	926607	951934	932197	C06044	ko00350,ko01100
mws2523	421.08	241.01	422.082	C12H23O14P	[M-H]-	Trehalose 6-phosphate	Others	Saccharides	4484-88-2	3	92867.9	45182.8	40606.7	102589	110558	157281	548780	904166	560668	907587	847813	697764	775236	741091	482949	358254	366694	367704	C00689	ko00500,ko01100,ko01110
Lmdn004802	911.5	911.5	912.508	C47H76O17	[M-H]-	Soyasaponin II	Terpenoids	Triterpene Saponin	55319-36-3	2	1.9742e+06	1.97815e+06	1.85897e+06	153008	206335	460870	592142	229770	562193	1.07807e+06	1.11743e+06	981608	1.48011e+06	1.53078e+06	1.13512e+06	1.17177e+06	1.18276e+06	1.14993e+06	C12081	-
pme3705	193.04	72.99	194.043	C6H10O7	[M-H]-	D-Glucoronic acid*	Others	Saccharides	6556-12-3	1	9.11008e+06	7.32561e+06	1.35916e+07	779557	859054	619316	2.00531e+06	173266	1.14521e+06	6.93386e+06	5.0234e+06	5.96669e+06	6.24847e+06	6.17619e+06	7.69021e+06	1.08618e+07	1.05796e+07	1.06185e+07	C00191	ko00040,ko00053,ko00520,ko00562,ko01100,ko01240,ko01250
Zdcp003644	251.14	105.07	250.132	C13H18N2O3	[M+H]+	N-Caffeoylputrescine	Alkaloids	Phenolamine	29554-26-5	1	1.88199e+06	2.0169e+06	4.77685e+06	1.14091e+07	3.31116e+06	3.49873e+06	3.44744e+06	1.00785e+06	3.67662e+06	1.76385e+06	2.02684e+06	2.41317e+06	1.426e+06	1.0989e+06	1.20233e+06	2.60038e+06	2.54219e+06	2.61166e+06	C03002	-
Wcsn009782	251.2	251.21	252.209	C16H28O2	[M-H]-	(E)-12-hydroxy-2,6,10-trimethyltrideca-2,5-dien-4-one	Others	Others	-	3	1.6665e+06	1.66296e+06	1.10142e+06	636329	1.50012e+06	777355	2.16149e+06	2.15047e+06	2.17107e+06	4.38806e+06	4.57291e+06	4.36389e+06	5.42881e+06	3.80935e+06	4.44926e+06	2.94514e+06	3.02224e+06	2.95034e+06	-	-
MWSmce698	149.1	65.04	148.089	C10H12O	[M+H]+	2',4'-Dimethylacetophenone	Others	Ketone compounds	89-74-7	2	1.247e+06	1.18301e+06	1.03012e+06	1.18736e+06	1.29156e+06	1.32005e+06	1.3202e+06	1.31634e+06	1.44463e+06	1.25587e+06	1.20066e+06	1.16428e+06	989929	977767	1.36844e+06	1.29201e+06	1.28336e+06	1.25631e+06	-	-
MWSmce689	293.25	95.09	292.24	C19H32O2	[M+H]+	Methyl linolenate	Lipids	Free fatty acids	301-00-8	1	449216	413873	450533	177659	241496	221562	4.33673e+06	1.12376e+06	4.5162e+06	1.18305e+07	1.06741e+07	9.638e+06	9.40583e+06	8.20524e+06	8.32821e+06	5.18243e+06	5.33466e+06	5.28027e+06	-	-
Hmln000873	331.07	169.01	332.074	C13H16O10	[M-H]-	2-O-Galloyl-D-glucose	Phenolic acids	Phenolic acids	-	3	1.02714e+06	1.05751e+06	5.49578e+06	1.29196e+07	5.07558e+06	1.2e+07	9	9	9	178807	39954.8	190991	206666	28445.5	154205	2.11552e+06	2.09739e+06	2.158e+06	-	-
Wbtn006810	287.05	135.04	288.063	C15H12O6	[M-H]-	6,7-dihydroxy-1,3-dimethoxyxanthen-9-one	Flavonoids	Other Flavonoids	-	2	623234	667852	1.08657e+06	1.32601e+06	315153	952259	8.24482e+06	5.71726e+06	1.37637e+07	6.35308e+06	5.61063e+06	7.64305e+06	4.05667e+06	3.78156e+06	3.26632e+06	3.68808e+06	3.71295e+06	3.60908e+06	-	-
pme3163	289.03	96.97	290.04	C7H15O10P	[M-H]-	D-Sedoheptuiose 7-phosphate	Others	Saccharides	2646-35-7	3	284773	255264	200563	164855	114325	169072	43410.7	30054.2	46940.9	72060.6	72605	79075.8	44469.7	29285.8	62458.6	70828.2	72895.4	71446.9	-	-
mws1013	177.02	133.03	178.027	C9H6O4	[M-H]-	Esculetin (6,7-Dihydroxycoumarin)	Lignans and Coumarins	Coumarins	305-01-1	1	2.35567e+06	2.34876e+06	2.03024e+06	792793	4.09672e+06	1.01452e+06	3.40844e+07	1.1082e+07	4.29396e+07	1.54419e+07	1.42375e+07	1.58389e+07	9.86221e+06	8.74827e+06	8.58892e+06	9.64284e+06	9.93049e+06	9.75486e+06	C09263	ko00999,ko01110
Lmmn005092	955.46	955.46	956.462	C47H72O20	[M-H]-	Medicagenic acid-3-O-glucuronide-28-O-rhamnosyl(1,2)-arabinoside	Terpenoids	Triterpene Saponin	-	2	2.10631e+07	3.38181e+07	2.14452e+07	40712.2	24027.7	47632.8	110257	19769.4	81762.1	9.35423e+06	8.69815e+06	8.32399e+06	2.77938e+06	3.0266e+06	2.6959e+06	8.94545e+06	8.87605e+06	8.68912e+06	-	-
Laxp006572	255.06	137.02	254.058	C15H10O4	[M+H]+	Hispidol	Flavonoids	Other Flavonoids	5786-54-9	1	1.72188e+07	1.92026e+07	6.24344e+06	195654	173786	264667	269099	373396	290202	1.63231e+07	1.9799e+07	1.78212e+07	3.30296e+07	2.76821e+07	3.51332e+07	1.89887e+07	1.89346e+07	1.84749e+07	C08644	-
WaYn003112	439.16	195.07	440.168	C21H28O10	[M-H]-	Erythro-Guaiacylglycerol-β-threo-syringylglycerol Ether	Lignans and Coumarins	Lignans	1313434-74-0	1	995149	1.15271e+06	1.01392e+06	2.63371e+06	1.87863e+06	2.08459e+06	8.90841e+06	6.5847e+06	8.59688e+06	5.36893e+06	5.33139e+06	5.73884e+06	4.00992e+06	4.18059e+06	3.76974e+06	3.79101e+06	3.90744e+06	3.85618e+06	-	-
Lmbn003970	329.23	211.14	330.241	C18H34O5	[M-H]-	9,12,13-TriHOME; 9(S),12(S),13(S)-Trihydroxy-10(E)-octadecenoic acid	Lipids	Free fatty acids	97134-11-7	2	6.83839e+06	6.85451e+06	7.0572e+06	2.17077e+06	4.20897e+06	3.10649e+06	4.94289e+06	5.64889e+06	4.58562e+06	1.23474e+07	1.30464e+07	1.15977e+07	1.37444e+07	1.31174e+07	1.33607e+07	8.99537e+06	8.73697e+06	8.80443e+06	C14833	ko00591
Hmgp003163	347.08	332.05	346.069	C17H14O8	[M+H]+	3,3',5,7-Tetrahydroxy-4',6-Dimethoxyflavone; (Laciniatin)*	Flavonoids	Flavonols	74161-28-7	3	40010	25005	33340	144584	528885	70020	3.48277e+06	1.3419e+06	2.85714e+06	684155	797141	649961	377817	525758	440882	591262	573604	582698	-	-
zjzp121504	235.17	119.08	234.162	C15H22O2	[M+H]+	eupatorenone	Terpenoids	Sesquiterpenoids	-	2	461950	352662	345443	95711.4	63746.6	105218	560564	182394	208612	289479	453910	306804	521427	430284	667380	363061	361450	352896	-	-
MWSprf117	221.09	130.06	220.085	C11H12N2O3	[M+H]+	5-Hydroxy-DL-tryptophan(5-HTP)	Amino acids and derivatives	Amino acids and derivatives	56-69-9	1	622411	369344	2.35864e+06	521263	615795	291339	2.34138e+06	120923	2.57461e+06	8.37528e+06	8.30048e+06	8.06445e+06	9.15362e+06	8.57508e+06	8.26548e+06	5.21736e+06	5.14159e+06	5.06092e+06	C01017	-
Zbfn007626	504.31	279.23	505.317	C25H48NO7P	[M-H]-	1-Linoleoyl-2-Lysophosphatidic Acid Monobutylamine Ester	Lipids	Glycerol ester	-	1	2.42353e+07	1.76893e+07	2.89108e+07	2.7098e+07	3.52181e+07	1.53916e+07	346667	410304	900725	691660	1.73383e+06	712994	966236	682511	3.18219e+06	1.80258e+07	1.77246e+07	1.74867e+07	-	-
Hmhp007382	359.1	344.09	358.105	C19H18O7	[M+H]+	5-Hydroxy-7,8,2',6'-Tetramethoxyflavone (Altisin)*	Flavonoids	Flavones	-	2	12191.2	57340.8	13404.9	8.53925e+06	9.96943e+06	9.912e+06	1.05114e+07	1.35639e+07	8.37826e+06	3.7936e+06	4.60235e+06	3.67786e+06	2.95664e+06	3.1565e+06	1.90716e+06	3.79811e+06	3.84815e+06	3.73262e+06	-	-
MWS1848	135.05	92.03	136.052	C8H8O2	[M-H]-	Phenyl acetate	Phenolic acids	Phenolic acids	122-79-2	1	2.25691e+06	2.12678e+06	3.59916e+06	1.07726e+07	7.64699e+06	6.58219e+06	2.13771e+07	2.59741e+07	2.57686e+07	1.14733e+07	8.21303e+06	1.05738e+07	5.3649e+06	4.40809e+06	5.61297e+06	9.68537e+06	9.84792e+06	9.55217e+06	C00548	-
MWS0434	287.2	269.21	288.209	C19H28O2	[M-H]-	Trans-dehydrorosinone	Others	Ketone compounds	53-43-0	3	525560	451350	452888	172839	301032	323507	767085	438270	674450	1.04443e+06	926209	989322	1.10685e+06	1.51197e+06	1.1478e+06	819686	795017	807955	-	-
pmf0175	157.16	157.16	158.167	C10H22O	[M-H]-	2-Decanol*	Others	Alcohol compounds	1120-06-5	3	163229	171205	168680	125231	150906	151518	159141	173369	148563	160142	146277	177000	156385	134693	142696	262125	263396	255935	-	-
pma0149	341.09	207.07	340.079	C15H16O9	[M+H]+	Sinapoyl malate	Phenolic acids	Phenolic acids	92344-58-6	3	1.80468e+06	1.73763e+06	2.1735e+06	145377	145818	165359	386186	362294	325178	1.34106e+06	1.55783e+06	1.46844e+06	1.84965e+06	1.58532e+06	1.69447e+06	1.20245e+06	1.22711e+06	1.19066e+06	C02887	ko00940,ko01110
Lman002731	341.09	135.04	342.095	C15H18O9	[M-H]-	Grevilloside F	Phenolic acids	Phenolic acids	1094004-50-8	3	2.538e+06	2.58014e+06	5.12589e+06	2.50074e+07	8.27843e+06	2.757e+07	194783	201880	340811	56866.3	93358	77566.4	54755.8	19233.1	824593	4.39128e+06	4.27096e+06	4.28051e+06	-	-
Lmrn002746	131.07	85.07	132.079	C6H12O3	[M-H]-	2-Hydroxy-4-methylpentanoic acid	Organic acids	Organic acids	498-36-2	2	182374	309513	74517.1	213038	1.59354e+06	218629	4.50556e+06	1.47462e+07	4.37265e+06	6.14364e+06	6.37058e+06	5.43412e+06	5.66757e+06	5.87716e+06	4.8143e+06	3.92935e+06	4.01972e+06	4.0489e+06	-	-
Lcsn006335	243.2	197.19	244.204	C14H28O3	[M-H]-	2-Hydroxymyristic acid	Organic acids	Organic acids	2507-55-3	1	8.80441e+06	1.01597e+07	6.05124e+06	829315	1.23695e+06	1.02393e+06	2.50293e+06	1.57909e+06	1.76397e+06	1.36559e+07	1.6884e+07	1.20231e+07	3.03129e+07	3.01554e+07	2.91887e+07	1.78613e+07	1.82842e+07	1.77498e+07	-	-
mws0437	151.06	59.01	152.069	C5H12O5	[M-H]-	D-Arabitol*	Others	Saccharides	488-82-4	1	4.53279e+06	5.29626e+06	1.94438e+06	1.53681e+06	1.96586e+06	1.85823e+06	5.07667e+06	4.16524e+06	5.685e+06	3.6132e+06	3.5273e+06	3.72308e+06	3.86086e+06	3.90459e+06	4.31396e+06	5.0243e+06	5.18082e+06	5.13516e+06	C01904	ko00040,ko01100
mws0008	149.06	105.07	150.068	C9H10O2	[M-H]-	Hydrocinnamic acid	Phenolic acids	Phenolic acids	501-52-0	2	49982.9	48897.7	59190.9	75498.3	41404.3	93630.2	1.11508e+06	1.41148e+06	1.26043e+06	1.29335e+06	1.68186e+06	1368776	1.54588e+06	1.54123e+06	1.63758e+06	1.16252e+06	1.12688e+06	1.15048e+06	C05629	ko00360,ko01100
MWS80007	311.22	249.22	312.23	C18H32O4	[M-H]-	13-Hydroperoxy-9Z,11E-octadecadienoic acid	Lipids	Free fatty acids	23017-93-8	3	418452	444729	283624	248139	280785	427308	586427	806729	549066	1.22283e+06	987291	1.00358e+06	1.2511e+06	922046	808402	707546	729160	724878	-	-
Lmbn005287	311.22	249.22	312.23	C18H32O4	[M-H]-	7S,8S-DiHODE; (9Z,12Z)-(7S,8S)-Dihydroxyoctadeca-9,12-dienoic acid	Lipids	Free fatty acids	143288-65-7	3	418452	444729	283624	248139	280785	427308	586427	806729	549066	1.22283e+06	987291	1.00358e+06	1.2511e+06	922046	808402	707546	729160	724878	C07354	ko00591
Lmdn007639	255.07	119.05	256.074	C15H12O4	[M-H]-	3,9-Dihydroxypterocarpan	Flavonoids	Isoflavones	61135-91-9	1	5.42439e+06	6.25461e+06	2.39705e+06	223297	208112	219565	259480	228644	196914	2.78667e+06	3.71476e+06	3.53637e+06	3.95642e+06	3.57422e+06	4.71907e+06	3.35129e+06	3.45986e+06	3.4025e+06	C04271	ko00943,ko01110
Hmqn003054	329.23	311.22	330.241	C18H34O5	[M-H]-	9,10,11-Trihydroxy-12-octadecenoic acid	Lipids	Free fatty acids	61911-67-9	2	3.78829e+06	3.49086e+06	3.29131e+06	3.2846e+06	6.82484e+06	4.26949e+06	2.93343e+07	2.08451e+07	2.88648e+07	3.57603e+07	1.99675e+07	1.71608e+07	1.76022e+07	3.25969e+07	2.76288e+07	2.17438e+07	2.17726e+07	2.23645e+07	-	-
Wbmn014614	497.36	141.02	498.371	C32H50O4	[M-H]-	3-Acetoxyolean-12-en-27-oic acid	Terpenoids	Triterpene	-	2	42942.7	43621.2	42789.7	47639.9	49312.4	46332.9	44090.4	45122.9	50125.2	46233.8	43650.8	44923.3	42499.6	45129.3	40414.1	43147.8	44502.3	44147.1	-	-
mws0918	283.06	268.04	284.068	C16H12O5	[M-H]-	Prunetin (5,4'-Dihydroxy-7-methoxyisoflavone)	Flavonoids	Isoflavones	552-59-0	1	1.18817e+06	951110	494588	205901	395145	1.45157e+06	1.84501e+06	1.45638e+06	6.56517e+06	1.19599e+06	2.20797e+06	1.94003e+06	824401	842097	6.54033e+06	2.10523e+06	2.16568e+06	2.16373e+06	C10521	ko00943
pmb3075	319.08	145.03	320.09	C16H16O7	[M-H]-	3-O-p-Coumaroylshikimic acid	Phenolic acids	Phenolic acids	-	3	46833.6	57635.1	23638.6	492405	60474.7	135233	87731.2	31016.1	80634	31803.4	30610.2	22377	43692.2	45553.7	28094.1	59617.9	60722.5	61555.1	-	-
Lmjn005765	249.15	205.16	250.157	C15H22O3	[M-H]-	Dihydro-epi-arteannuin B	Terpenoids	Sesquiterpenoids	-	2	29686.5	31512.7	29576.4	210362	265623	198801	402417	445820	797542	133852	180787	205696	169382	199095	115532	187697	192345	186650	-	-
Hmln003529	401.15	269.11	402.153	C18H26O10	[M-H]-	Benzyl β-primeveroside	Phenolic acids	Phenolic acids	130622-31-0	2	596756	455383	832962	579998	572251	840948	316975	148194	240712	83365	162903	147385	145562	148417	132398	309693	308624	300666	-	-
pme2237	181.072	101.024	182.079	C6H14O6	[M-H]-	Dulcitol*	Others	Saccharides	608-66-2	1	1.27939e+07	1.43445e+07	4.02861e+06	7.63878e+06	1.8305e+07	6.51314e+06	2.63621e+07	1.69198e+07	4.21856e+06	987363	1.01347e+06	983074	1.05347e+06	1.24379e+06	1.6614e+06	1.19766e+07	1.15943e+07	1.17984e+07	C01697	ko00052,ko01100
pme0282	165.02	77.04	166.027	C8H6O4	[M-H]-	Phthalic acid	Phenolic acids	Phenolic acids	88-99-3	3	659701	730841	732523	342443	421351	398564	551712	520747	630038	703169	690309	746904	794134	715701	694330	634636	620925	641047	C01606	ko01100,ko02010
Walp006014	387.11	337.07	386.101	C20H18O8	[M+H]+	Clemiscosin A	Lignans and Coumarins	Coumarins	-	1	517728	490459	1.20187e+06	8.11829e+06	5.67623e+06	6.65506e+06	2.17471e+07	2.06315e+07	2.56323e+07	7.48933e+06	5.81445e+06	9.85413e+06	3.18777e+06	4.61374e+06	3.23066e+06	6.41898e+06	6.42643e+06	6.60543e+06	-	-
Lcsp000520	187.11	70.07	186.1	C8H14N2O3	[M+H]+	Alanylproline	Amino acids and derivatives	Amino acids and derivatives	13485-59-1	2	2.11961e+06	1.66175e+06	2.7707e+06	871921	2.04399e+06	449386	2.14758e+06	1.35559e+06	1.87548e+06	3.33908e+06	3.07811e+06	3.83453e+06	3.70914e+06	2.97949e+06	3.72103e+06	4.2382e+06	4.21038e+06	4.10867e+06	-	-
HJAP050	344.15	177.05	343.142	C19H21NO5	[M+H]+	N-Feruloyl-3-methoxytyramine*	Alkaloids	Phenolamine	78510-19-7	1	1.49952e+06	936177	2.00837e+06	160728	887671	1.3665e+07	1.0191e+07	5.39487e+06	1.00884e+07	7.28151e+06	1.64998e+07	3.96199e+07	2.5521e+06	995115	7.37841e+06	6.24397e+06	6.20561e+06	6.05367e+06	-	-
Lmqn009304	325.11	293.08	326.115	C19H18O5	[M-H]-	Eucalyptin (5-Hydroxy-7,4'-dimethoxy-6,8-dimethylflavone)	Flavonoids	Flavanones	3122-88-1	3	4.07843e+06	5.17279e+06	2.90838e+06	90592.4	153269	100916	2.49444e+06	728064	2.34352e+06	3.50359e+07	3.77776e+07	3.16139e+07	4.37706e+07	3.24879e+07	3.47901e+07	2.06302e+07	2.09975e+07	2.03238e+07	-	-
mws0943	151.05	71.01	152.059	C7H8N2O2	[M-H]-	1,4-Dihydro-1-Methyl-4-oxo-3-pyridinecarboxamide	Alkaloids	Pyridine alkaloids	769-49-3	2	3.90111e+06	3.81241e+06	1.89648e+06	2.29285e+06	2.44419e+06	2.47531e+06	3.43938e+06	3.16815e+06	3.36748e+06	2.71164e+06	2.64088e+06	2.83992e+06	2.94593e+06	2.91848e+06	3.31367e+06	3.91593e+06	3.86584e+06	3.79054e+06	C05843	ko00760,ko01100
MWSmce501	167.04	108.02	168.042	C8H8O4	[M-H]-	Protocatechuic Acid Methyl Ester	Phenolic acids	Phenolic acids	2150-43-8	3	2.51239e+06	2.60805e+06	1.30624e+06	5.67886e+06	3.34896e+06	1.46907e+07	3.24115e+06	4.29497e+06	4.01166e+06	3.83148e+06	2.99561e+06	3.55828e+06	2.73669e+06	1.85099e+06	2.09106e+06	2.70029e+06	2.75174e+06	2.66356e+06	-	-
Hahn002259	829.28	175.04	830.284	C37H50O21	[M-H]-	kurroaoside C	Others	Others	-	2	343394	374614	476330	9	9	9	9	9	9	42327.6	22277.3	27591.6	10265.1	11670	12120	73479.2	71663.6	71262.3	-	-
Lazn006616	613.23	225.08	614.236	C32H38O12	[M-H]-	Buddlenol F	Lignans and Coumarins	Lignans	97399-83-2	2	25850.1	38310.7	36722	139715	150991	155170	707842	460529	652754	279526	283546	324063	203456	211722	236717	216853	211966	218882	-	-
MWSmce257	218.11	88.04	219.111	C9H17NO5	[M-H]-	D-Pantothenic Acid	Others	Vitamin	79-83-4	1	2.59925e+07	3.03105e+07	2.36131e+07	7.07089e+06	1.71217e+07	8.17298e+06	7.90736e+06	9.05731e+06	7.75763e+06	2.45495e+07	2.42379e+07	2.35853e+07	3.22201e+07	2.92245e+07	2.71008e+07	2.06945e+07	2.0843e+07	2.01948e+07	C00864	ko00410,ko00770,ko01100,ko01110,ko01240
Zamn006847	227.13	183.14	228.136	C12H20O4	[M-H]-	glycoric acid	Others	Others	-	1	1.47532e+07	1.57893e+07	1.38709e+07	2.97445e+06	5.59118e+06	4.98511e+06	3.34032e+06	4.81436e+06	3.37724e+06	1.28777e+07	1.28287e+07	1.19113e+07	1.51297e+07	1.35227e+07	1.22804e+07	1.63657e+07	1.65371e+07	1.60048e+07	-	-
MWS3136	167.04	108.03	168.042	C8H8O4	[M-H]-	4-Methoxysalicylic Acid	Phenolic acids	Phenolic acids	2237-36-7	3	342985	271497	206659	119364	101376	138549	106360	102585	71480.2	352906	322481	270678	644711	553436	633804	383588	377820	371001	-	-
Lcsp000522	213.12	70.07	212.116	C10H16N2O3	[M+H]+	Prolylproline	Amino acids and derivatives	Amino acids and derivatives	20488-28-2	2	2.3959e+06	1.86428e+06	4.50587e+06	983504	1.74723e+06	455158	6.85007e+06	3.89725e+06	7.36324e+06	1.68785e+07	1.83491e+07	1.57575e+07	2.19711e+07	1.85242e+07	1.72136e+07	1.20105e+07	1.21946e+07	1.24183e+07	-	-
Wasn002329	366.08	160.04	367.09	C16H17NO9	[M-H]-	Xanthurenic Acid 8-O-Glucoside	Alkaloids	Quinoline alkaloids	97451-32-6	2	1.16327e+06	736004	5.17172e+06	463868	718417	631640	16556.5	9486.39	4174.18	40444.6	76345.4	50180.8	57021.2	42119.3	59922.3	468000	483886	477741	-	-
pmf0557	327.04	171.06	350.034	C16H11N2NaO4S	[M-Na]-	Orange I	Alkaloids	Alkaloids	523-44-4	2	1.40301e+07	1.96407e+07	1.17709e+07	1.06699e+06	1.8338e+06	1.12974e+06	2.2855e+06	3.12905e+06	2.24762e+06	6.98342e+06	6.78529e+06	6.29905e+06	8.36144e+06	7.6758e+06	7.96632e+06	7.71231e+06	7.50967e+06	7.4774e+06	C19371	-
mws1405	267.03	211.05	268.037	C15H8O5	[M-H]-	Coumestrol	Lignans and Coumarins	Coumarins	479-13-0	2	1.34556e+07	9.45927e+06	1.10944e+07	51632.1	10831.4	34811.1	93012	82504	31694.6	3.33155e+06	3.47154e+06	3.19481e+06	5.77858e+06	4.35512e+06	6.957e+06	4.9916e+06	4.88324e+06	4.82929e+06	C10205	ko00943,ko01110
Lazn002213	409.15	165.06	410.158	C20H26O9	[M-H]-	1-(4-Hydroxy-3-methoxyphenyl)-2-[4-(1,2,3-trihydroxypropyl)-2-methoxyphenoxy]-1,3-propanediol	Lignans and Coumarins	Lignans	-	3	325720	433003	469801	4.96646e+06	2.22634e+06	2.42731e+06	6.58452e+06	6.49473e+06	6.91336e+06	3.10944e+06	2.94179e+06	3.54873e+06	2.28183e+06	2.22927e+06	2.17012e+06	2.56108e+06	2.62097e+06	2.53551e+06	-	-
Zbqn003921	250.07	88.04	251.079	C12H13NO5	[M-H]-	N-carboxy-N-(2-oxo-2-phenylethyl)-L-alanine	Amino acids and derivatives	Amino acids and derivatives	-	1	3.818e+07	5.37891e+07	4.06627e+07	1.05558e+07	8.41622e+06	8.72725e+06	8.18926e+06	7.66524e+06	9.64033e+06	1.49628e+07	1.36094e+07	1.31935e+07	12104354	1.41417e+07	1.63028e+07	1.88301e+07	1.91814e+07	1.85375e+07	-	-
Zmdn005358	373.13	313.1	374.137	C20H22O7	[M-H]-	Vladinol D	Lignans and Coumarins	Lignans	-	3	580433	253500	306640	3.63854e+06	2.89111e+06	5.02722e+06	1.53592e+07	1.17007e+07	1.57015e+07	4.21185e+06	3.4473e+06	5.00326e+06	2.14481e+06	2.61764e+06	2.31033e+06	3.03746e+06	3.10424e+06	3.14218e+06	-	-
Lhmp122203	285.08	270.05	284.068	C16H12O5	[M+H]+	Melannin	Lignans and Coumarins	Coumarins	58115-08-5	3	1.15575e+06	1.2131e+06	971620	1.24831e+06	1.62585e+06	4.53462e+06	1.53844e+06	861749	2.02839e+06	3.82051e+06	3.92901e+06	5.56642e+06	3.67236e+06	2.50342e+06	3.82015e+06	2.39155e+06	2.34782e+06	2.31106e+06	-	-
Lmmn004951	329.23	171.1	330.241	C18H34O5	[M-H]-	2-Hydroxy-4-methyl-3-undecanoyloxypentanoic acid methyl ester	Lipids	Free fatty acids	-	2	3.54383e+07	3.05296e+07	3.05827e+07	2.10868e+07	6.15385e+07	3.23881e+07	3.22748e+07	6.87231e+07	3.34326e+07	3.27741e+07	3.06918e+07	3.17699e+07	3.15565e+07	3.19618e+07	3.80676e+07	3.63242e+07	3.60772e+07	3.51562e+07	-	-
Lhfp110340	221.19	119.08	220.183	C15H24O	[M+H]+	Eremofukinone	Terpenoids	Sesquiterpenoids	-	2	2.38992e+06	2.45174e+06	1.58862e+06	729696	1.01387e+06	944785	3.37026e+06	3.21852e+06	1.63498e+06	5.34699e+06	5.33619e+06	5.75509e+06	6.43292e+06	6.40678e+06	5.8321e+06	4.51337e+06	4.65601e+06	4.64391e+06	-	-
MWS201398	219.1	86.06	218.09	C8H14N2O5	[M+H]+	Hyp-Ser	Amino acids and derivatives	Amino acids and derivatives	-	3	6.75819e+06	3.86824e+06	1.46833e+07	260015	1.6114e+06	300740	2.69359e+06	953931	1.98682e+06	2.66907e+06	2.4418e+06	3.72322e+06	1.63749e+06	1.26042e+06	1.59696e+06	3.57026e+06	3.66949e+06	3.68607e+06	-	-
mws1178	271.1	135.05	272.105	C16H16O4	[M-H]-	Vestitol	Flavonoids	Other Flavonoids	35878-41-2	1	558773	570069	428701	13612.5	9245.65	8046.87	31877.9	27710.7	31911.5	1.23055e+06	1.81712e+06	1.71477e+06	2.15529e+06	1.877e+06	2.49711e+06	1.34131e+06	1.29925e+06	1.30552e+06	C16225	ko00943,ko01110
Lahp002273	127.05	110.02	126.043	C5H6N2O2	[M+H]+	furan-2-carbohydrazide	Alkaloids	Alkaloids	-	2	2.92962e+06	2.0383e+06	2.26411e+06	204079	1.12649e+06	404660	66896.5	40994.6	80598.1	141335	136530	191021	117472	59836.1	92133.2	565393	546205	556365	-	-
Walp007192	406.35	300.29	405.345	C22H47NO5	[M+H]+	2-aminodocoSane-1,6,19,20,21-pentaol	Lipids	Sphingolipids	-	3	767996	700355	768490	842038	629494	673337	762234	590650	726186	679534	760752	697227	2.7616e+06	742796	616410	1.16848e+06	1.14212e+06	1.18163e+06	-	-
pmp001106	595.17	577.16	594.159	C27H30O15	[M+H]+	Vitexin-2''-O-glucoside	Flavonoids	Flavones	61360-94-9	1	1.97397e+06	1.56212e+06	2.03854e+06	333730	893051	1.17334e+06	1.60458e+06	1.18501e+06	1.29663e+06	3.35874e+06	3.01678e+06	3.20473e+06	2.4558e+06	2.62989e+06	3.38752e+06	2.01871e+06	2.04431e+06	2.08882e+06	C04024	ko00944
Lmmn001294	331.1	153.02	332.111	C14H20O9	[M-H]-	Koaburaside*	Phenolic acids	Phenolic acids	41653-73-0	1	4.47024e+06	4.25876e+06	4.46776e+06	2.96427e+07	6.3035e+06	1.92576e+07	232638	132040	161757	60142.3	80726.3	122611	23422.5	57945.8	100072	2.79445e+06	2.75341e+06	2.8501e+06	-	-
Wbmn009893	393.22	333.21	394.236	C22H34O6	[M-H]-	3-Acetoxy-9,13-epoxy-16-hydroxy-labda-15,16-olide	Terpenoids	Ditepenoids	-	2	20357	32970	29971.9	9	9	9	117636	591941	68472.3	623145	574008	599721	461189	373366	642745	299509	305110	310116	-	-
mws2104	193.07	59.01	194.079	C7H14O6	[M-H]-	D-Pinitol	Others	Saccharides	10284-63-6	1	1.52655e+07	1.04087e+07	1.41878e+07	5.60966e+07	2.8544e+07	3.42409e+07	2.47801e+06	1.25747e+06	1.89253e+06	4.29517e+06	3.56147e+06	3.98675e+06	4.00903e+06	4.06478e+06	4.94484e+06	1.25618e+07	1.21928e+07	1.21876e+07	C03844	-
Wmmn002441	183.03	124.02	184.11	C10H16O3	[M-H]-	(E)-Linalool-1-oic acid	Lipids	Free fatty acids	-	3	285681	211008	238023	371815	526492	616148	395555	125987	180343	1.27814e+06	1.29569e+06	1.3351e+06	1.40083e+06	1.18402e+06	1.1742e+06	912333	942874	918698	-	-
MWSmce230	183.03	124.02	184.037	C8H8O5	[M-H]-	Methyl gallate	Phenolic acids	Phenolic acids	99-24-1	2	285681	211008	238023	371815	526492	616148	395555	125987	180343	1.27814e+06	1.29569e+06	1.3351e+06	1.40083e+06	1.18402e+06	1.1742e+06	912333	942874	918698	-	-
pmp000509	127.04	109.03	126.032	C6H6O3	[M+H]+	Maltol	Others	Ketone compounds	118-71-8	1	857228	1.10031e+06	659436	257843	897557	295466	563845	494914	631076	2.05561e+06	1.8042e+06	1670549	2.22645e+06	2.50535e+06	2.56259e+06	1.75327e+06	1.80965e+06	1.80496e+06	C11918	ko00523,ko01110
Zmyn000155	173.11	131.08	174.1	C7H14N2O3	[M-H]-	N-α-Acetyl-L-ornithine	Amino acids and derivatives	Amino acids and derivatives	6205-08-9	1	1.20258e+06	1.00708e+06	940999	4.57115e+06	2.20464e+06	1.37246e+06	867355	240991	848706	1.42032e+06	1.6434e+06	1.58554e+06	1.78191e+06	1.68564e+06	1.78722e+06	1.87801e+06	1.90753e+06	1.84194e+06	C00437	ko00220,ko01100,ko01110,ko01210,ko01230
mws0359	241.22	241.22	242.225	C15H30O2	[M-H]-	Pentadecanoic Acid	Lipids	Free fatty acids	1002-84-2	1	1.9589e+06	2.12729e+06	1.53326e+06	963596	1.43013e+06	1.1301e+06	1.89048e+06	1.34409e+06	2.03664e+06	2.33328e+06	2.91728e+06	2.26734e+06	2.9801e+06	2.95805e+06	3.62137e+06	3.69463e+06	3.58981e+06	3.70773e+06	C16537	-
MWS2376	143.07	143.07	144.079	C7H12O3	[M-H]-	4-Hydroxycyclohexylcarboxylic acid	Organic acids	Organic acids	3685-26-5	1	11462.5	4833.43	19685	2805.58	3601.62	7688.86	5.47326e+06	4.17858e+06	5.5676e+06	2.1338e+06	2.58312e+06	1.70798e+06	1.0466e+06	988060	610953	1.23655e+06	1.2473e+06	1.20551e+06	-	-
Lmjp007279	359.11	326.08	358.105	C19H18O7	[M+H]+	Penduletin 4'-Methyl Ether (5-Hydroxy-3,6,7,4'-Tetramethoxyflavone)	Flavonoids	Flavones	14787-34-9	3	14452.4	74183.6	20774.6	4.94794e+06	5.18892e+06	5.82089e+06	5.92443e+06	7.34215e+06	5.2936e+06	2.35703e+06	2669863	2.28924e+06	1.6599e+06	1.81574e+06	1.15765e+06	2.36749e+06	2.42609e+06	2.34452e+06	-	-
mws0789	255.07	151	256.074	C15H12O4	[M-H]-	Pinocembrin (Dihydrochrysin)	Flavonoids	Flavanones	480-39-7	1	155473	143116	261255	569546	471054	645936	1.27948e+06	767323	1.05871e+06	1.08169e+06	1.0238e+06	1.39499e+06	779679	642172	850705	709374	712318	689451	C09827	ko00941
Smhp011040	359.11	298.08	358.105	C19H18O7	[M+H]+	ageconyflavone B	Flavonoids	Flavones	-	2	10160.6	4671.01	10556.2	2.37838e+06	2.42368e+06	2.87389e+06	2.94384e+06	3.81232e+06	2.6578e+06	1.08952e+06	1.22539e+06	1.12721e+06	768428	843745	536020	1.1014e+06	1.12533e+06	1.08651e+06	-	-
pmp001264	274.27	256.27	273.267	C16H35NO2	[M+H]+	Hexadecylsphingosine	Lipids	Sphingolipids	-	2	1.19202e+07	1.13403e+07	1.28058e+07	1.32074e+07	1.08651e+07	1.19301e+07	1.13927e+07	1.19383e+07	1.10107e+07	1.06067e+07	1.0904e+07	1.1776e+07	2.16277e+07	1.06106e+07	1.11227e+07	1.94874e+07	2.01e+07	2.00979e+07	-	-
mws1177	283.06	254.06	284.068	C16H12O5	[M-H]-	Maackiain	Flavonoids	Isoflavones	2035-15-6	2	371752	278451	185393	3427.23	2774.61	8732.54	4547.76	6455.37	6869.52	235805	304550	207261	434458	420067	431729	295941	303147	292829	C10502	ko00943
Lhyp111013	135.04	89.04	134.037	C8H6O2	[M+H]+	2(4H)-benzofuranone	Others	Others	-	3	319566	196786	2.01002e+06	1.85886e+07	3.23504e+06	1.9685e+07	454180	274689	845567	128905	59023.5	178759	27525.3	86700	8.60314e+06	3.24399e+06	3.13046e+06	3.18158e+06	-	-
mws0889	135.03	75.01	136.037	C4H8O5	[M-H]-	D-Threonic Acid	Others	Saccharides	3909-12-4	1	4.84121e+06	3.17327e+06	5.05604e+06	2.1667e+06	1.77368e+06	1.81562e+06	430645	308427	395863	1.26747e+06	949274	1.16123e+06	1.17399e+06	1.13772e+06	1.52672e+06	1.89608e+06	1.96225e+06	1.90966e+06	C21649	-
Zbqp002414	261.15	132.1	260.137	C11H20N2O5	[M+H]+	h-gamma-Glu-leu-oh	Amino acids and derivatives	Amino acids and derivatives	-	1	3.58249e+06	3.79832e+06	2.80998e+06	199822	892772	311290	85787.5	48226.1	126456	1.01383e+06	837509	854941	1.6189e+06	1.28089e+06	1.81197e+06	1.85975e+06	1.86337e+06	1.92084e+06	-	-
Lmbn001034	147.07	85.03	148.074	C6H12O4	[M-H]-	2,3-Dihydroxy-3-methylpentanoic acid	Organic acids	Organic acids	562-43-6	2	129960	167798	117933	132082	155702	131728	639351	696022	590761	475870	531069	447415	374358	396912	310633	322532	313516	311721	C06007	ko00290,ko01100,ko01110,ko01210,ko01230
pmb3012	461.11	299.06	462.116	C22H22O11	[M-H]-	Chrysoeriol-7-O-glucoside	Flavonoids	Flavones	19993-32-9	3	1.65551e+06	1.52954e+06	1.47335e+06	1.12618e+06	526734	1.88737e+06	239388	243632	304579	187317	112240	176880	50831.4	67290.6	102167	824947	795221	808661	-	-
Ylyn012389	485.32	485.32	486.334	C30H46O5	[M-H]-	celastolide	Terpenoids	Triterpene	-	2	413962	579719	371267	986895	543402	341709	483197	801502	711222	1.13112e+06	907716	666383	1.09018e+06	1.19882e+06	1.15415e+06	856166	885438	882485	-	-
mws0208	145.051	101.061	146.058	C6H10O4	[M-H]-	Adipic Acid*	Organic acids	Organic acids	124-04-9	3	2.5046e+06	2.80014e+06	1.81629e+06	519073	683787	505924	2.96507e+06	1.84947e+06	1.37814e+06	2.8921e+06	4.23875e+06	2.40875e+06	4.93262e+06	3.53391e+06	4.21392e+06	3.19175e+06	3.11379e+06	3.07923e+06	C06104	ko01100
mws0902	255.07	135.01	256.074	C15H12O4	[M-H]-	Liquiritigenin	Flavonoids	Flavanones	578-86-9	1	1.30137e+07	1.3669e+07	4.54236e+06	664932	772638	592146	964864	782068	927676	1.61067e+07	1.95658e+07	1.96219e+07	2.25156e+07	1.9765e+07	2.65845e+07	1.76384e+07	1.80554e+07	1.74112e+07	C09762	ko00941,ko00943,ko01100,ko01110
Lmsp013116	321.24	123.08	320.235	C20H32O3	[M+H]+	Ent-16α,17-Dihydroxykauran-2-one	Terpenoids	Ditepenoids	-	1	137909	66384.5	153759	157094	372724	144234	1.43637e+06	600224	834374	1.7636e+06	1.90734e+06	1.41606e+06	2.59142e+06	2.09679e+06	2.13434e+06	1.29972e+06	1.3375e+06	1.34569e+06	-	-
MWSmce184	219.06	173.03	218.058	C12H10O4	[M+H]+	Ethyl 3-coumarincarboxylate	Lignans and Coumarins	Coumarins	1846-76-0	3	98626.2	116045	166770	3.40635e+06	1.3772e+07	4.11896e+06	5.10504e+06	4.52676e+06	6.93248e+06	1.093e+06	1.92206e+06	1.65945e+06	1.35552e+06	858996	858154	2.18503e+06	2.14214e+06	2.1058e+06	-	-
Wafn002491	385.08	209.03	386.085	C16H18O11	[M-H]-	2-O-Feruloylglucaric Acid	Phenolic acids	Phenolic acids	-	2	366478	199893	1.08765e+06	151026	263449	124140	1.0066e+06	137784	944777	676129	660548	794037	435420	369620	376185	633240	629099	651347	-	-
Wcsn008935	331.19	249.19	332.199	C20H28O4	[M-H]-	2-hydroxy-3-(4,8,12-trimethyl-10-oxotrideca-3,7,11-trienyl)-2H-furan-5-one	Others	Others	-	3	6.27296e+06	3.47481e+06	657724	240088	738340	321595	1.70396e+06	836520	1.6079e+06	7.7338e+06	8.25296e+06	7.22898e+06	9.83183e+06	7.89162e+06	7.89118e+06	4.62249e+06	4.7842e+06	4.76236e+06	-	-
MWS20169	269.05	254.02	270.053	C15H10O5	[M-H]-	2,5-dihydroxy-1-methoxy-anthraquinone	Quinones	Anthraquinone	-	3	2.18506e+06	1.50056e+06	620246	30478	9844.98	10197.8	21845.1	41384	21866.2	1.38311e+06	1.88147e+06	1.65615e+06	2.41391e+06	1.79034e+06	3.64736e+06	1.94413e+06	2.00253e+06	2.01276e+06	-	-
Zbn006783	301.04	245.05	302.045	C15H10O7	[M-H]-	5,6-Dihydroxylucidin	Quinones	Anthraquinone	-	1	15513.6	10568.8	21830	6021.32	24774.8	5731.94	3.99998e+06	422536	6.4061e+06	8.72561e+06	4.15781e+06	4.29846e+06	1.31696e+06	841606	2.26779e+06	1.84689e+06	1.87394e+06	1.91638e+06	-	-
Wcjp001256	268.1	136.06	267.097	C10H13N5O4	[M+H]+	Lopac-A-9251	Others	Others	-	3	8.64157e+07	9.45436e+07	1.14045e+08	1.583e+07	3.27947e+07	1.85527e+07	5.66169e+06	1.00658e+07	1.01122e+07	6.23416e+06	7.61259e+06	1.33427e+07	1.28162e+07	9.11712e+06	3.78202e+07	2.4883e+07	2.48776e+07	2.56949e+07	-	-
MWS3149	151.04	107.05	152.047	C8H8O3	[M-H]-	3-Methoxybenzoic acid	Phenolic acids	Phenolic acids	586-38-9	2	133792	170177	115160	2.28431e+06	4.39922e+06	2.99128e+06	8.96505e+06	7.78694e+06	8.86474e+06	3.87943e+06	4.42613e+06	4.60422e+06	2.81003e+06	3.86203e+06	2.29348e+06	3.25148e+06	3.28784e+06	3.16951e+06	-	-
Yaln008277	393.22	311.22	394.236	C22H34O6	[M-H]-	Trijugin A	Terpenoids	Sesquiterpenoids	-	1	1.08071e+07	1.15571e+07	1.25591e+07	1.81893e+06	3.14622e+06	3.84447e+06	7.95836e+06	6.2522e+06	7.2104e+06	1.36814e+07	6.43547e+06	1.2469e+07	7.03011e+06	1.06379e+07	1.08223e+07	5.66351e+06	5.45994e+06	5.60441e+06	-	-
pme3440	273.08	137.05	272.068	C15H12O5	[M+H]+	Butein	Flavonoids	Chalcones	487-52-5	3	1.81809e+06	2.12235e+06	1.16424e+06	30029	99833.4	158647	90035	35231.6	101710	1.29724e+06	2.40641e+06	2.98828e+06	2.14065e+06	2.15927e+06	2.4851e+06	1.52325e+06	1.54589e+06	1.5812e+06	C08578	ko00941
Hmbn002645	151.04	135.01	152.047	C8H8O3	[M-H]-	3,4-Dihydroxyacetophenone	Others	Ketone compounds	1197-09-7	2	126396	140902	52787.6	29365.6	16353.2	16347.3	26502.5	70533.4	78035	164744	238229	246563	491092	349217	436008	215526	207981	209542	C10675	-
Lmyn003131	206.05	162.06	207.053	C10H9NO4	[M-H]-	Dioxindole-3-acetic acid	Alkaloids	Plumerane	-	2	285941	31362.7	41132.8	143802	167399	159835	1.07135e+06	153077	1.14868e+06	488129	623530	617851	457032	491632	403851	335545	329029	323070	-	-
Lmhp009129	482.32	184.07	481.317	C23H48NO7P	[M+H]+	LysoPC 15:0(2n isomer)*	Lipids	LPC	-	1	9.93725e+06	9.8414e+06	9.94347e+06	3.13825e+06	2.12003e+06	2.28454e+06	32068.3	104524	37346.8	44112.7	44693.5	46811.1	33288.6	20540.8	80525	2.47024e+06	2.48499e+06	2.55898e+06	-	-
pmb2799	295.23	195.14	296.235	C18H32O3	[M-H]-	12,13-Epoxy-9-Octadecenoic Acid	Lipids	Free fatty acids	6799-85-5	1	1.82363e+06	1.94364e+06	1.18961e+06	1.51481e+06	4.08122e+06	1.65804e+06	1.51915e+06	2.5769e+06	1.5154e+06	2.39295e+06	2.07608e+06	2.16974e+06	1.78158e+06	1.51879e+06	1.91145e+06	1.92417e+06	1.87506e+06	1.9461e+06	C14826	ko00591,ko01100
mws0983	326.31	62.06	325.298	C20H39NO2	[M+H]+	N-Oleoylethanolamine	Alkaloids	Alkaloids	111-58-0	1	1.09289e+06	1.02655e+06	634724	494454	892643	794593	1.41111e+06	2.35624e+06	1.64149e+06	2.43644e+06	2.55757e+06	1.85739e+06	2.01361e+06	1.68185e+06	1.99711e+06	1.76548e+06	1.79681e+06	1.83391e+06	C20792	-
Lmbn005443	293.21	235.17	294.219	C18H30O3	[M-H]-	13-KODE; (9Z,11E)-13-Oxooctadeca-9,11-dienoic acid	Lipids	Free fatty acids	54739-30-9	2	5.58127e+06	6.72612e+06	1.16348e+07	1.42683e+06	2.70052e+06	1.09282e+06	838100	891591	726773	2.67948e+06	1.86611e+06	2.15797e+06	1.57302e+06	1.41491e+06	1.55912e+06	2.7379e+06	2.72952e+06	2.64473e+06	C14765	ko00591
pme2960	273.08	153.02	272.068	C15H12O5	[M+H]+	Naringenin chalcone; 2',4,4',6'-Tetrahydroxychalcone	Flavonoids	Chalcones	73692-50-9	2	2.90797e+06	2.6625e+06	2.98228e+06	1.62148e+06	1.08842e+06	1.26276e+06	3.14351e+06	3.10771e+06	5.1378e+06	4.93133e+06	4.84437e+06	4.76607e+06	5.22498e+06	4.35723e+06	4.77028e+06	4.42269e+06	4.37397e+06	4.26071e+06	C06561	ko00941,ko01100,ko01110
HJN016	623.24	460.18	624.247	C36H36N2O8	[M-H]-	Cannabisin D	Alkaloids	Alkaloids	-	2	487211	480322	761379	536716	951368	2.84625e+06	3.42183e+06	1.87212e+06	1.28911e+06	3.45499e+06	2.0909e+06	3.86654e+06	1.69184e+06	729204	3.21609e+06	1.66851e+06	1.62017e+06	1.68014e+06	C17908	-
pmb3101	175.06	115.04	176.069	C7H12O5	[M-H]-	2-Isopropylmalic Acid	Organic acids	Organic acids	49601-06-1	1	1.79478e+07	2.40992e+07	9.84407e+06	3.84944e+07	7.894e+07	3.88056e+07	5.1445e+07	4.95203e+07	5.025e+07	3.0454e+07	3.4752e+07	3.30581e+07	3.20078e+07	3.16208e+07	2.68789e+07	3.2406e+07	3.26195e+07	3.14586e+07	C02504	ko00290,ko00620,ko01100,ko01110,ko01210,ko01230
Zmzp006646	317.07	302.04	316.058	C16H12O7	[M+H]+	Capillarisin	Others	Chromone	56365-38-9	1	1.91916e+06	1.36922e+06	530027	66106.8	479879	99899.3	1.74419e+07	2.23205e+06	1.21196e+07	7.27551e+06	5.18983e+06	6.96413e+06	4.62529e+06	2.91668e+06	4.75863e+06	4.09932e+06	4.22205e+06	4.2511e+06	C08999	-
Sadn007155	269.12	225.09	270.126	C17H18O3	[M-H]-	4-(hydroxymethyl)-1,8-dimethyl-9,10-dihydrophenanthrene-2,7-diol	Terpenoids	Ditepenoids	-	2	912943	813561	962210	54466.5	43083.4	39099.7	64559.9	48777.4	41826.7	2.16095e+06	2.12444e+06	2.03925e+06	2.6003e+06	2.30291e+06	2.23785e+06	1.76625e+06	1.80841e+06	1.8351e+06	-	-
HX1332	291.23	93.07	290.225	C19H30O2	[M+H]+	Roupelliol(ISO1)	Others	Others	-	3	5.53738e+07	5.14933e+07	5.44278e+07	2.66598e+06	3.66162e+06	7.01658e+06	2.57602e+06	1.88356e+06	2.32681e+06	2.0977e+07	1.78462e+07	1.6928e+07	2.27143e+07	2.05919e+07	2.12726e+07	2.17959e+07	2.22929e+07	2.26498e+07	-	-
Lajn006059	331.12	286.05	332.126	C18H20O6	[M-H]-	7,4'-Dihydroxy-8,2',3'-trimethoxyisoflavan	Flavonoids	Other Flavonoids	-	2	2.09593e+06	983828	1.3556e+06	8652.55	3640.49	9588.19	12601.1	20108	15995.9	2.57937e+06	2.38712e+06	1.91848e+06	2.9085e+06	2.04486e+06	3.49501e+06	2.07735e+06	2.11411e+06	2.03415e+06	-	-
mws1086	457.37	375.29	458.376	C30H50O3	[M-H]-	Olean-12-ene-3,22,23-triol (Soyasapogenol B)	Terpenoids	Triterpene	595-15-3	3	1.28097e+07	1.28226e+07	1.29897e+07	1.34046e+07	1.33887e+07	1.34475e+07	1.32758e+07	1.35758e+07	1.31023e+07	1.2908e+07	1.28792e+07	1.30123e+07	1.29434e+07	1.28775e+07	1.31935e+07	1.30822e+07	1.30393e+07	1.26306e+07	C08980	-
mws0058	299.06	284.03	300.063	C16H12O6	[M-H]-	Diosmetin (5,7,3'-Trihydroxy-4'-methoxyflavone)*	Flavonoids	Flavones	520-34-3	1	1.76495e+06	1.69645e+06	1.59937e+06	494142	471404	575524	724399	712156	655208	8.47123e+06	9.05227e+06	7.98505e+06	1.32577e+07	1.2369e+07	1.02903e+07	7.48797e+06	7.30655e+06	7.20837e+06	C10038	-
Zasn010433	307.26	307.26	308.272	C20H36O2	[M-H]-	9,12-Octadecadienoic acid,ethyl ester*	Others	Others	6114-21-2	1	259444	228772	274081	252828	297420	328175	271216	246138	231861	228363	227593	240539	197701	194194	192869	234328	240571	231643	-	-
MWSslk235	181.07	59.01	182.079	C6H14O6	[M-H]-	Allitol	Others	Saccharides	488-44-8	3	9864595	1.17838e+07	3.19189e+06	6.52351e+06	1.40841e+07	5770258	2.25048e+07	1.38676e+07	3.70336e+06	1.31631e+06	1.41411e+06	1.16428e+06	1.57654e+06	1.37422e+06	1.72921e+06	9.78627e+06	9.66058e+06	9.4179e+06	-	-
Rfmb091	295.23	195.14	296.235	C18H32O3	[M-H]-	9S-Hydroxy-10E,12Z-octadecadienoic acid*	Lipids	Free fatty acids	15514-85-9	2	2.04696e+07	1.5866e+07	1.85356e+07	1.45796e+07	1.88971e+07	1.64651e+07	1.93753e+07	2.25393e+07	1.99619e+07	1.70743e+07	1.60996e+07	1.74635e+07	1.80732e+07	1.73469e+07	2.32263e+07	21101457	2.02968e+07	2.07543e+07	C14767	ko00591
pmb3074	337.09	191.06	338.1	C16H18O8	[M-H]-	5-O-p-Coumaroylquinic acid	Phenolic acids	Phenolic acids	1899-30-5	2	543493	242587	1.98889e+06	3.2264e+06	1.45116e+06	3.33361e+06	1.79574e+06	827273	1.97975e+06	201815	109581	245251	43911.1	91595.6	62700.3	920351	922303	952788	C12208	ko00940,ko00941,ko00945,ko01110
Wcfn003941	305.07	96.96	306.077	C12H18O7S	[M-H]-	Sulfo jasmonate	Others	Others	-	3	9.28314e+07	1.04697e+08	1.7285e+08	1.44157e+07	2.07094e+07	3.22849e+07	1.48042e+07	1.89057e+07	1.72676e+07	8.25303e+07	8.36605e+07	7.26688e+07	4.92732e+07	3.3745e+07	3.60966e+07	5.24045e+07	5.07352e+07	5.25766e+07	-	-
Wcjp002598	146.06	91.05	145.053	C9H7NO	[M+H]+	8-hydroxyquinoline	Alkaloids	Quinoline alkaloids	148-24-3	1	8.03132e+06	7.78278e+06	1.23753e+07	1.05565e+07	6.65908e+06	8.21375e+06	5.62573e+06	511174	5.89903e+06	1.47096e+07	1.45365e+07	1.41793e+07	1.58418e+07	1.51131e+07	1.50152e+07	1.28931e+07	1.2525e+07	1.24217e+07	C19434	-
Zmhn001420	165.02	121.03	166.027	C8H6O4	[M-H]-	5,7-Dihydroxy-1(3H)-isobenzofuranone	Phenolic acids	Phenolic acids	27979-58-4	2	455121	7.25378e+06	7.54339e+06	322299	5.22137e+06	4.46785e+06	7.1261e+06	7.18272e+06	797752	731845	8.73053e+06	8.56831e+06	991655	820194	8.88723e+06	7.5328e+06	7.27288e+06	7.29196e+06	-	-
pme0281	165.02	121.03	166.027	C8H6O4	[M-H]-	Terephthalic acid	Phenolic acids	Phenolic acids	100-21-0	3	455121	7.25378e+06	7.54339e+06	322299	5.22137e+06	4.46785e+06	7.1261e+06	7.18272e+06	797752	731845	8.73053e+06	8.56831e+06	991655	820194	8.88723e+06	7.5328e+06	7.27288e+06	7.29196e+06	C06337	ko01100
Cmmn012997	301.22	301.22	302.225	C20H30O2	[M-H]-	Abietic acid*	Terpenoids	Ditepenoids	514-10-3	2	175867	130596	123245	6.50871e+06	4.70529e+06	4.36141e+06	4.62625e+06	4.94703e+06	5.51168e+06	1.75706e+06	1.82465e+06	1.92943e+06	1.1323e+06	1.15915e+06	1.24614e+06	2.50312e+06	2.6007e+06	2.57657e+06	C06087	ko00904,ko01100,ko01110
mws0059	609.15	301.04	610.153	C27H30O16	[M-H]-	Quercetin-3-O-rutinoside (Rutin)	Flavonoids	Flavonols	153-18-4	2	1.72584e+07	7.79615e+06	4.23829e+07	1652875	2.17953e+07	1.47233e+07	1.63889e+06	865121	1.47842e+06	7.17494e+06	8.36225e+06	1.00451e+07	4.82494e+06	2.31121e+06	2.13234e+06	1.07661e+07	1.05513e+07	1.09789e+07	C05625	ko00944,ko01100,ko01110
Wbtn007603	299.06	284.03	300.063	C16H12O6	[M-H]-	9,11-dimethoxy-2h-[1,3]dioxolo[4,5-b]xanthen-10-one	Flavonoids	Other Flavonoids	-	1	1.58388e+06	1.47358e+06	1.56973e+06	599692	582237	756709	888784	759620	679425	8.71353e+06	8.83367e+06	8.84211e+06	1.21831e+07	1.11275e+07	1.04875e+07	7.73013e+06	7.45126e+06	7.49425e+06	-	-
Qayp009396	317.21	119.09	316.204	C20H28O3	[M+H]+	Solidagenone	Terpenoids	Ditepenoids	23534-56-7	3	19876	28411.2	43779.2	2.65758e+06	967019	934407	1.0095e+06	1.1678e+06	952217	371032	422085	443921	263471	391616	250106	601190	595811	578658	-	-
Wafn011571	295.23	195.14	296.235	C18H32O3	[M-H]-	alpha-Hydroxylinoleic acid*	Lipids	Free fatty acids	57818-44-7	2	1.94535e+07	1.56571e+07	1.90544e+07	1.35036e+07	1.96302e+07	1.58621e+07	1.98804e+07	2.23187e+07	2.07585e+07	1.67308e+07	1.64652e+07	1.66319e+07	1.80432e+07	1.64785e+07	2.35953e+07	2.07787e+07	2.01744e+07	2.09583e+07	-	-
MWSmce165	165.08	59.02	166.084	C6H14O5	[M-H]-	L-Fucitol	Others	Saccharides	13074-06-1	3	4.55532e+06	4.02447e+06	2.66452e+06	2.10065e+06	3.1998e+06	1.95308e+06	731494	1.11102e+06	682845	1.09468e+06	984498	1.09914e+06	1.39387e+06	1.45646e+06	1.56741e+06	1.81996e+06	1.85965e+06	1.78712e+06	-	-
Zbfn013528	271.23	225.22	272.235	C16H32O3	[M-H]-	(R)-Beta-Hydroxypalmitic Acid	Lipids	Free fatty acids	-	1	192937	199708	188018	67149	59469.9	55761	452910	73770.1	380739	172643	195777	128608	222268	240656	279251	511027	491570	505528	-	-
Wahp005790	600.27	454.24	599.263	C34H37N3O7	[M+H]+	Di-p-coumaroylcaffeoyl Spermidine	Alkaloids	Phenolamine	-	3	71880.2	517362	2.55881e+06	153817	126730	321403	130766	181839	100040	422626	2.49808e+06	485818	299523	177190	106136	526415	547852	538499	-	-
pme3443	207.07	192.04	208.074	C11H12O4	[M-H]-	Sinapinaldehyde	Phenolic acids	Phenolic acids	4206-58-0	2	861107	650331	797045	1.46981e+07	4.13578e+06	7.88438e+06	1.47031e+07	4.4205e+06	1.70795e+07	4.9316e+06	4.40214e+06	8.58384e+06	2.26013e+06	2.37497e+06	3.99315e+06	3.66605e+06	3.70215e+06	3.56165e+06	C05610	ko00940,ko01100,ko01110
Zmjp011129	473.36	455.35	472.355	C30H48O4	[M+H]+	1,3-Dihydroxyurs-12-en-28-oic acid (Kaneric acid)	Terpenoids	Triterpene	107693-87-8	2	121521	66149	95179.2	65463.1	52559.4	77311	65910.6	64159.9	81797.5	304147	476263	416106	905601	558039	422580	375438	378610	364273	-	-
Lmtn002796	449.11	287.06	450.116	C21H22O11	[M-H]-	Aromadendrin-7-O-glucoside	Flavonoids	Flavanonols	28189-90-4	2	1.84249e+06	2.14847e+06	1.79416e+06	178930	154011	678034	9	9	9	77590.9	122603	161261	159830	143947	222759	844000	812960	839897	-	-
Jmcn008002	251.17	191.14	252.173	C15H24O3	[M-H]-	Ilicic acid	Terpenoids	Sesquiterpenoids	4586-68-9	1	15819.6	20392.6	21902.9	793595	1.68232e+06	680039	2.45366e+06	2.41462e+06	5.4766e+06	408125	546553	737746	401112	309756	236518	742755	772631	765008	-	-
mws2184	207.07	135.04	208.074	C11H12O4	[M-H]-	Ethyl caffeate	Phenolic acids	Phenolic acids	102-37-4	3	9084.9	51632.5	12308.1	9	9	9	2.89195e+06	927243	7.83552e+06	245898	226150	404078	110018	130888	1.46387e+06	628083	613868	602904	-	-
Lmtn002916	507.08	331.05	508.085	C22H20O14	[M-H]-	Mearnsetin-3-O-glucuronide	Flavonoids	Flavones	-	3	3.53171e+07	3.79682e+07	5.08385e+07	101157	38699	47216.1	12814.9	22247.2	25974.5	1.65434e+06	705992	1.31511e+06	1.09086e+06	927483	732793	12197346	1.24678e+07	1.27096e+07	-	-
Hmcn000192	209.07	59.01	210.074	C7H14O7	[M-H]-	Sedoheptulose	Others	Saccharides	3019-74-7	1	4.09402e+06	3.50587e+06	5.63055e+06	1.02593e+07	9.79668e+06	9.10155e+06	1.68351e+06	1.0561e+06	1.43873e+06	1.05161e+06	889071	1.10851e+06	856266	675445	1.05191e+06	2.27961e+06	2.35279e+06	2.26393e+06	C02076	ko00710,ko01100
pmn001706	471.35	471.35	472.355	C30H48O4	[M-H]-	2,3-Dihydroxyolean-12-en-28-oic acid (2-Hydroxyoleanolic acid)*	Terpenoids	Triterpene	26707-60-8	2	77590.6	172365	36690.5	29596.5	28329	149809	86880.6	64125.4	57071.7	1.31082e+07	1.6016e+07	1.24495e+07	2.20782e+07	1.88527e+07	1.80522e+07	1.08269e+07	1.07521e+07	1.04135e+07	-	-
Lmzn206284	471.35	471.35	472.355	C30H48O4	[M-H]-	3,13-Dihydroxylup-20(29)-en-28-oic acid (Terminic acid)	Terpenoids	Triterpene	-	2	77590.6	172365	36690.5	29596.5	28329	149809	86880.6	64125.4	57071.7	1.31082e+07	1.6016e+07	1.24495e+07	2.20782e+07	1.88527e+07	1.80522e+07	1.08269e+07	1.07521e+07	1.04135e+07	-	-
mws1358	109.03	81.03	110.037	C6H6O2	[M-H]-	Pyrocatechol	Phenolic acids	Phenolic acids	120-80-9	2	27930.3	19730.1	22174.4	26675	91291.3	76701.7	3.17033e+07	216326	3.60992e+07	1.7624e+07	1.91685e+07	1.7647e+07	14658648	1.38058e+07	1.30531e+07	1.01253e+07	1.01989e+07	9.8079e+06	C00090	ko01100
Lmqp010784	315.23	109.07	314.225	C21H30O2	[M+H]+	Progesterone	Terpenoids	Ditepenoids	57-83-0	3	155693	105246	95883.7	183407	93296.6	118105	110274	204667	131172	176599	89876.2	127400	109487	99627.3	118644	113145	108949	112747	C00410	ko01100
Yazn005837	329.16	225.15	330.168	C16H26O7	[M-H]-	Boschnaside	Terpenoids	Monoterpenoids	-	1	9.4148e+06	1.03218e+07	1.20367e+07	439925	523939	672314	77909.3	83863.8	76592.3	30322.7	100520	52646.6	9	9	9	1.56258e+06	1.5625e+06	1.61951e+06	-	-
Wcfn008271	239.03	223.02	240.042	C14H8O4	[M-H]-	Danthron; 1,8-Dihydroxyanthraquinone	Quinones	Anthraquinone	117-10-2	3	5.54635e+06	5.75611e+06	2.20624e+06	2.61465e+06	2.48336e+06	4.58296e+06	5.80412e+06	3.88835e+06	5.57601e+06	3.52558e+06	3.38673e+06	4.05007e+06	3.06352e+06	3.07687e+06	3.18756e+06	2.89832e+06	2.93185e+06	2.81497e+06	C10312	-
Lmyn012274	469.33	469.33	470.34	C30H46O4	[M-H]-	3,25-Epoxy-3-hydroxyolean-18-en-28-oic acid (Semimoronic acid)	Terpenoids	Triterpene	102053-38-3	2	147047	179569	63448.5	337362	293691	296763	217815	226278	260981	96594.8	135159	131836	67939	152962	99562.3	158334	158219	164093	-	-
Zmyn004676	293.21	113.1	294.219	C18H30O3	[M-H]-	17-Hydroxylinolenic acid	Lipids	Free fatty acids	-	2	1.43331e+07	1.42012e+07	1.61629e+07	8.0508e+06	3.67375e+07	1.12684e+07	7.10387e+06	3.58221e+07	7.27409e+06	4.9411e+06	4.91401e+06	5.22699e+06	5.5085e+06	6.97631e+06	6.65458e+06	9.68692e+06	1.01024e+07	9.88673e+06	C16346	ko00592
pmf0348	187.13	97.06	188.141	C10H20O3	[M-H]-	2,6-Dimethyl-7-octene-2,3,6-triol	Others	Alcohol compounds	73815-21-1	3	1.78576e+07	2.00245e+07	1.00297e+07	7.84594e+06	1.20921e+07	9.3129e+06	1.5497e+07	2.65737e+07	1.63599e+07	2.18541e+07	2.37794e+07	2.14753e+07	3.35656e+07	3.00188e+07	2.90625e+07	2.10204e+07	2.0198e+07	2.03752e+07	-	-
mws0805	308.1	87.01	309.106	C11H19NO9	[M-H]-	N-Acetylneuraminic acid	Amino acids and derivatives	Amino acids and derivatives	131-48-6	3	98465.6	52483.5	57366.7	151051	264160	125738	376937	141631	351775	157581	155841	188214	108690	94540.4	141410	229275	225153	234817	C00270	ko00520,ko01100,ko01250
MWSmce644	209.08	93.03	208.074	C11H12O4	[M+H]+	4-Acetoxy-3-Ethoxybenzaldehyde	Others	Aldehyde compounds	72207-94-4	3	499402	200499	798730	154296	74084.9	170235	940748	168940	945351	1.06752e+06	1.0539e+06	1.03902e+06	984615	993716	878547	771469	752554	784925	-	-
pme3250	285.08	229.09	284.068	C16H12O5	[M+H]+	Biochanin A	Flavonoids	Isoflavones	491-80-5	1	103386	143706	142222	69071.4	12900	19010.4	20466.8	29376.5	12781.1	256979	230490	398222	292407	312813	262031	176939	184604	181252	C00814	ko00943,ko01100,ko01110
MWSmce466	135.05	92.03	136.052	C8H8O2	[M-H]-	4-Hydroxyacetophenone	Others	Ketone compounds	99-93-4	1	2.14989e+06	1.83866e+06	3.64466e+06	1.09427e+07	7.60604e+06	6.2018e+06	2.00122e+07	2.47355e+07	2.24238e+07	9.81849e+06	8.31033e+06	1.04274e+07	4.8067e+06	5.02546e+06	5.83681e+06	8.82764e+06	8.83591e+06	9.16107e+06	C10700	ko01100
Lmrn003201	204.07	158.06	205.074	C11H11NO3	[M-H]-	Indole-3-lactic acid	Alkaloids	Plumerane	1821-52-9	1	701820	1.12424e+06	179796	845563	1.82419e+06	663211	2.05713e+07	3.12327e+06	2.08346e+07	1.65173e+07	1.64924e+07	1.49851e+07	1.40778e+07	1.45047e+07	1.18092e+07	7.27408e+06	7.24489e+06	6.99647e+06	C02043	-
MWSmce387	183.03	124.02	184.037	C8H8O5	[M-H]-	3-O-Methylgallic acid	Phenolic acids	Phenolic acids	3934-84-7	1	67266.2	105800	1.2979e+07	60080.6	220395	190580	5.76591e+06	1.15449e+06	5.61834e+06	1.51213e+07	9.50077e+06	1.21166e+07	2.08554e+06	2.09603e+06	2.32517e+06	3.90916e+06	3.75069e+06	3.79875e+06	C05616	-
ZbWn005232	267.09	96.96	268.098	C10H20O6S	[M-H]-	(4-(pent-4-en-1-yloxy)butoxy)methyl hydrogen sulfate	Others	Others	-	2	9	9	9	6.03866e+06	4.23432e+06	4.49677e+06	5.31798e+06	3.93225e+06	4.13887e+06	2.96917e+06	3.4597e+06	3.50224e+06	2.4174e+06	2.12405e+06	2.09857e+06	2.83869e+06	2.96149e+06	2.91223e+06	-	-
Lmzn001925	239.09	195.1	240.1	C12H16O5	[M-H]-	3,4'-Dihydroxy-3'-methoxybenzenepentanoic acid	Phenolic acids	Phenolic acids	-	1	170588	181647	166222	386893	409948	340051	426570	547210	509062	429688	435251	403248	432113	377975	380109	336439	350736	346474	-	-
Wbtn002952	300.11	138.06	301.116	C13H19NO7	[M-H]-	1-(β-D-Glucopyranosyl)-3-ethyl-4-methyl-1H-pyrrole-2,5-dione	Others	Ketone compounds	-	2	2.04392e+07	2.57052e+07	3.01971e+07	1.38608e+07	1.48024e+07	1.85074e+07	5.22528e+06	4.11998e+06	4.93065e+06	836080	675778	1.09481e+06	1.54152e+06	1.12537e+06	1.94923e+06	8.04745e+06	7.85063e+06	8.19255e+06	-	-
Sayn008823	509.12	255.06	510.132	C30H22O8	[M-H]-	pauferrol C	Terpenoids	Ditepenoids	-	2	2.72022e+06	1.70173e+06	635921	33239.8	11685.6	7532.65	31451.5	23971.5	23624.6	731405	813075	966291	3.32315e+06	3.21514e+06	3.99061e+06	2.04541e+06	2.10061e+06	2.13432e+06	-	-
Zjxp110312	235.17	161.13	234.162	C15H22O2	[M+H]+	12-Carboxyeudesma-3,11(13)-diene(Isocostic acid)	Terpenoids	Sesquiterpenoids	69978-82-1	3	593576	580973	714463	1.98028e+06	8.74988e+06	3.40419e+06	7.75161e+06	8.79395e+06	8.53186e+06	2.9041e+06	3.3186e+06	3.37533e+06	2.32556e+06	3.2268e+06	1.51716e+06	3.0484e+06	3.00942e+06	3.13816e+06	-	-
Jmgn004021	449.11	269.05	450.116	C21H22O11	[M-H]-	6-C-Glucosyl-2-Hydroxynaringenin	Flavonoids	Flavanones	-	2	1.07383e+07	1.22782e+07	1.61158e+07	1.15017e+08	1.06399e+08	1.17486e+08	787411	1.37464e+06	584510	155747	172566	217143	144746	129035	112364	2.36546e+07	2.38174e+07	2.46228e+07	-	-
MWSmce183	151.04	77.04	152.047	C8H8O3	[M-H]-	D-Mandelic acid	Organic acids	Organic acids	611-71-2	3	195050	210890	153286	1.02943e+06	1.79648e+06	928677	2.78131e+06	3.65052e+06	3.03881e+06	1.3165e+06	1.26618e+06	1.46411e+06	816498	741587	577616	1.24427e+06	1.2063e+06	1.25777e+06	-	-
Wbhp008502	275.2	133.1	274.193	C18H26O2	[M+H]+	Tagalsin Q	Terpenoids	Terpene	-	1	1.14765e+07	9.4267e+06	1.55297e+07	1.35138e+06	5.30387e+06	3.03661e+06	5.31459e+06	1.01915e+07	6.9353e+06	1.8991e+07	1.4096e+07	1.71163e+07	1.36247e+07	1.3929e+07	1.60668e+07	1.32915e+07	1.37322e+07	1.38521e+07	-	-
mws0282	203.08	116.05	204.09	C11H12N2O2	[M-H]-	L-Tryptophan	Amino acids and derivatives	Amino acids and derivatives	73-22-3	1	863118	706071	1.22004e+06	1.01413e+06	586935	739615	539607	8918.37	569222	1.76048e+06	1.71003e+06	1.52773e+06	1.98873e+06	1.86154e+06	1.84913e+06	1.37939e+06	1.42632e+06	1.43748e+06	C00078	ko00260,ko00380,ko00400,ko00901,ko00966,ko00970,ko00996,ko00999,ko01100,ko01110,ko01210,ko01230,ko01240
pme3096	118.01	74.02	119.022	C3H5NO4	[M-H]-	Aminomalonic acid	Organic acids	Organic acids	1068-84-4	3	1.34912e+07	1.49789e+07	1.94467e+07	1.14232e+07	10904457	8.9654e+06	1.45387e+07	7.37984e+07	1.98765e+07	8.18368e+07	8.29678e+07	7.92596e+07	8.81153e+07	8.66352e+07	7.73045e+07	6.37555e+07	6.24752e+07	6.10283e+07	C00872	-
Lmbn005487	313.24	251.24	314.246	C18H34O4	[M-H]-	12,13-DHOME; (9Z)-12,13-Dihydroxyoctadec-9-enoic acid	Lipids	Free fatty acids	263399-35-5	3	519133	496553	521465	542299	709551	699627	1.12649e+06	1.2056e+06	1.06895e+06	1.10232e+06	1.14641e+06	1.0755e+06	1.44879e+06	1.29737e+06	1.0472e+06	1.11607e+06	1.08494e+06	1.13293e+06	C14829	ko00591
pme3033	104.07	58.07	103.063	C4H9NO2	[M+H]+	N,N-Dimethylglycine	Amino acids and derivatives	Amino acids and derivatives	1118-68-9	3	7.55777e+06	7.90473e+06	1.20441e+07	1.44977e+07	8.6762e+06	7.43643e+06	1.35396e+07	5.27801e+06	8.7424e+06	7.08955e+06	1.08095e+07	4.95186e+06	1.02205e+07	6.77778e+06	7.17172e+06	8.55124e+06	8.34949e+06	8.72438e+06	C01026	ko00260,ko01100
mws0913	447.09	285.04	448.101	C21H20O11	[M-H]-	Kaempferol-3-O-galactoside (Trifolin)*	Flavonoids	Flavonols	23627-87-4	2	2.33864e+06	1.41618e+07	3.92792e+06	935374	553692	583215	47051.4	48765.4	90035	75522.7	221845	69069.3	37174.3	78329	86519.5	2.07748e+06	2.08155e+06	2.00125e+06	C12626	ko00944,ko01110
pme3007	402.99	158.93	404.002	C9H14N2O12P2	[M-H]-	Uridine 5'-diphosphate	Nucleotides and derivatives	Nucleotides and derivatives	27821-45-0	3	275392	311530	233707	260549	275013	293696	157463	175793	151279	310834	168345	176221	276074	292035	283490	256531	267619	265011	C00015	ko00240,ko00908,ko01100,ko01232,ko01240
Hmcp003783	211.09	193.07	210.079	C13H10N2O	[M+H]+	1-Acetyl-β-carboline	Alkaloids	Plumerane	-	3	80081.1	121859	114689	81237.6	180189	171623	498165	852840	425377	395878	312275	325112	284112	244785	224740	293851	286833	281206	-	-
Lmbn001718	129.06	57.03	130.063	C6H10O3	[M-H]-	3-Methyl-2-oxopentanoic acid	Organic acids	Organic acids	24809-08-3	3	615839	731329	512092	99992.2	110256	116873	25005	76670.9	19777.3	20541.8	11372.3	19426.5	29860.4	13486.9	9012.64	147838	143717	150126	C00671	ko00280,ko00290,ko00785,ko00966,ko01100,ko01110,ko01210,ko01230
Wcfn003882	371.1	121.03	372.106	C16H20O10	[M-H]-	(2S,3S,4S,5R,6R)-6-(3-benzoyloxy-2-hydroxypropoxy)-3,4,5-trihydroxyoxane-2-carboxylic acid	Others	Others	-	3	1.66751e+07	2.57084e+07	4.81839e+07	369214	1.03186e+06	1.28243e+06	157942	45010	155088	202138	156218	267611	117826	69046.7	87072.8	6.30087e+06	6.4073e+06	6.58199e+06	-	-
Wcsn011332	279.23	261.23	280.24	C18H32O2	[M-H]-	Ethyl (10Z,13Z)-hexadeca-10,13-dienoate	Others	Others	-	3	1.01053e+06	910546	834990	988065	1.23443e+06	974428	1.60134e+06	1.61085e+06	1.70989e+06	1.92954e+06	1.93077e+06	1.96909e+06	1.917e+06	1.50767e+06	1.7859e+06	1.53918e+06	1.47598e+06	1.52649e+06	-	-
Zmxn002705	151.04	109.03	152.047	C8H8O3	[M-H]-	2,5-Dihydroxyacetophenone*	Others	Ketone compounds	490-78-8	2	9	9	9	979248	1.09414e+06	750779	4.46693e+06	3.85236e+06	1.10403e+07	686222	817713	959997	806025	412617	278987	1.40025e+06	1.41184e+06	1.45962e+06	-	-
Walp007095	230.25	62.06	229.241	C14H31NO	[M+H]+	2-Amino-7-methyltridecan-1-ol	Lipids	Sphingolipids	-	3	140587	158318	134352	164137	161002	138896	172817	137033	165991	172821	157762	163342	180464	162350	159945	163483	167392	170898	-	-
Hmhp005846	345.09	330.07	344.09	C18H16O7	[M+H]+	Tenaxin I*	Flavonoids	Flavones	86926-52-5	2	190989	115350	94596.3	6.37979e+07	7.37137e+07	7.88125e+07	7.19251e+07	7.62942e+07	6.9882e+07	2.63773e+07	3.26913e+07	2.96767e+07	2.14249e+07	2.01072e+07	1.67422e+07	3.16581e+07	3.17496e+07	3.29365e+07	-	-
MWS1771	196.1	91.05	195.089	C10H13NO3	[M+H]+	L-Tyrosine methyl ester	Amino acids and derivatives	Amino acids and derivatives	1080-06-4	3	291858	208449	210979	71832.5	60269.3	116953	196047	34024.6	151521	155809	103704	80514.2	128565	124445	140951	221900	213795	213276	C03404	-
Lmqp006559	330.34	312.33	329.329	C20H43NO2	[M+H]+	2-Amino-1,3-eicosanediol	Others	Alcohol compounds	-	3	3.4355e+06	3.39413e+06	3.76789e+06	4.31326e+06	4.14149e+06	4.17441e+06	4.18359e+06	4.68407e+06	4.61964e+06	4.38037e+06	4.22866e+06	4.32404e+06	925856	4.4507e+06	4.59519e+06	1.01926e+07	1.05491e+07	1.0633e+07	-	-
pmb0881	478.29	337.27	477.286	C23H44NO7P	[M+H]+	LysoPE 18:2	Lipids	LPE	-	2	2.9378e+07	2.74591e+07	1.61397e+07	2.54127e+07	1.72082e+07	2.16927e+07	245628	262375	484922	284855	373833	322653	98084	84748.8	479278	7.49871e+06	7.24284e+06	7.55525e+06	-	-
Zmhn000892	301.09	139.05	302.1	C13H18O8	[M-H]-	4-O-Glucosyl-3,4-dihydroxybenzyl alcohol	Phenolic acids	Phenolic acids	-	2	307386	852182	445844	4.07032e+06	3.62116e+06	5.92945e+06	62744.1	64390	37710.2	36829.7	55817.6	62549.8	26011.1	22380.8	36494.4	957621	915924	932978	-	-
pmb1466	511.12	331.08	510.116	C26H22O11	[M+H]+	Tricin-4'-O-syringic acid	Flavonoids	Flavones	-	3	44219.9	110183	52909.2	9	9	9	45151.5	7708.08	16751.6	187815	190023	101347	183701	14479.2	194427	119589	119554	114970	-	-
Ymmg000006	281.14	123.08	282.147	C15H22O5	[M-H]-	Rugosic acid A	Others	Others	-	2	214346	316168	227882	315709	523705	268313	1.08811e+06	1.643e+06	1.12645e+06	1.21323e+06	1.14186e+06	1.10321e+06	891744	1.1458e+06	902878	669423	644900	643112	-	-
Lakn004098	281.14	171.12	282.147	C15H22O5	[M-H]-	Dihydrophaseic acid	Terpenoids	Sesquiterpenoids	41756-77-8	2	305226	382852	237822	731914	762833	531014	1.79831e+06	2.54982e+06	1.68926e+06	1.74097e+06	1.81052e+06	1.64113e+06	1.46297e+06	1.80423e+06	1.28988e+06	1.05034e+06	1.08086e+06	1.09843e+06	C15971	ko00906
mws0884	328.05	134.05	329.053	C10H12N5O6P	[M-H]-	Cyclic 3',5'-Adenylic acid	Nucleotides and derivatives	Nucleotides and derivatives	60-92-4	3	674867	987969	331247	100175	658181	159890	49661	34178.5	55841.2	41870.5	47662.9	34454.4	56429.7	31311.6	56437.2	196255	197588	204687	C00575	ko00230,ko01100
pmp000010	347.08	332.05	346.069	C17H14O8	[M+H]+	5,7,4',5'-Tetrahydro-3',6-dimethoxyflavone	Flavonoids	Flavones	-	3	10005	4655.96	7142.94	996292	1.05991e+06	1.34069e+06	1.22282e+06	1.49705e+06	1.20129e+06	481744	522061	515584	359340	353495	227160	464216	483857	466594	-	-
Wafn002081	285.06	153.02	286.069	C12H14O8	[M-H]-	Dihydroxybenzoyl xyloside	Phenolic acids	Phenolic acids	-	1	3.84557e+07	5.01777e+07	7.39311e+07	7.39589e+06	1.1592e+07	1.79303e+07	248277	280369	349955	426013	848448	688073	827607	422203	685455	2.84929e+07	2.974e+07	2.87378e+07	-	-
pmb3317	371.1	179.1	372.106	C16H20O10	[M-H]-	Quinacyl syringic acid	Phenolic acids	Phenolic acids	-	3	97918	114437	256934	67064.7	71159.8	52527.2	44392.4	63807	52521.8	98646.2	94842.6	108488	130455	114093	93848.9	96753.8	92875.6	93193.2	-	-
Lmnn002886	477.14	179.03	478.147	C23H26O11	[M-H]-	1'-O-(3,4-Dihydroxyphenethyl)-O-caffeoyl-glucoside	Phenolic acids	Phenolic acids	-	3	498119	2.10328e+06	2.07206e+07	580009	298188	1.66291e+06	66685	36656	77534.2	156139	268736	395051	175115	22653	53350	1.99417e+06	1.92267e+06	2.00604e+06	-	-
Lmbn014696	301.22	301.22	302.225	C20H30O2	[M-H]-	Pimaric acid*	Terpenoids	Ditepenoids	127-27-5	2	42099.9	17742.9	149843	6.91745e+07	5.00559e+07	4.73234e+07	4.70485e+07	6.0401e+07	5.55181e+07	1.66405e+07	2.19143e+07	2.05201e+07	1.07464e+07	2.92678e+07	1.54119e+07	2.75855e+07	2.85798e+07	2.88048e+07	C09159	-
pmb0885	291.2	191.11	290.188	C18H26O3	[M+H]+	4-Oxo-9Z,11Z,13E,15E-Octadecatetraenoic Acid	Lipids	Free fatty acids	-	3	830968	816661	1.18771e+06	108823	176922	123384	32124.3	187875	96544.4	66685	254917	178020	247587	206849	222243	339891	332828	324667	-	-
MWS3270	166.02	79.96	167.022	C7H5NO4	[M-H]-	Quinolinic Acid	Alkaloids	Pyridine alkaloids	89-00-9	3	914088	889803	608695	941133	1.00027e+06	829885	532300	686691	480447	576172	485426	482007	678050	612471	659511	615688	588084	602416	C03722	ko00380,ko00410,ko00760,ko01100,ko01240
Lmcp007750	231.14	185.13	230.131	C15H18O2	[M+H]+	Furanodienone	Terpenoids	Sesquiterpenoids	24268-41-5	2	114749	132960	61172.1	2.37836e+06	2.3469e+07	1.05425e+07	9.96674e+06	2.76377e+07	1.65422e+07	845505	4.94546e+06	1.82472e+06	2.85587e+06	579301	736570	5.61728e+06	5.54973e+06	5.37198e+06	-	-
Lsjp211253	301.21	255.21	300.209	C20H28O2	[M+H]+	Sugiol	Terpenoids	Ditepenoids	511-05-7	2	57377.9	53551.7	176641	8.87728e+07	3.14818e+07	2.50864e+07	2.37072e+07	3.96751e+07	3.12099e+07	7.96365e+06	1.20021e+07	1.09086e+07	4.85429e+06	1.13496e+07	7.65117e+06	1.48961e+07	1.54798e+07	1.55281e+07	C21822	ko00904,ko01110
zjhp113010	361.16	169.1	360.157	C20H24O6	[M+H]+	Eupachinilide B(iso-1)	Terpenoids	Sesquiterpenoids	-	2	6559.03	8654.02	50015	276259	536374	261758	456880	433400	422423	142703	138213	77399.1	122114	154697	93467.4	190739	198095	190093	-	-
pmn001583	609.15	300.03	610.153	C27H30O16	[M-H]-	Quercetin-3-O-robinobioside	Flavonoids	Flavonols	52525-35-6	2	2.14142e+07	9.96632e+06	5.09998e+07	2.70512e+06	2.75168e+07	1.86654e+07	1.91102e+06	932264	1.73186e+06	8.49628e+06	10612825	1.20286e+07	6.05356e+06	2.87561e+06	2.47986e+06	1.32236e+07	1.26275e+07	1.29273e+07	-	-
MWSHC20155	191.04	176.01	192.042	C10H8O4	[M-H]-	Scopoletin (7-Hydroxy-6-methoxycoumarin)	Lignans and Coumarins	Coumarins	92-61-5	1	53028.8	70179.9	43284.1	6.68191e+06	1.83786e+07	8.98859e+06	1.63005e+07	2.03486e+07	1.60986e+07	6.19835e+06	4.54008e+06	6.87958e+06	3.24318e+06	3.91805e+06	2.95878e+06	3.54301e+06	3.70703e+06	3.65555e+06	C01752	ko00999,ko01110
MA10040889	154.01	123.01	155.022	C6H5NO4	[M-H]-	4-Nitrocatechol	Phenolic acids	Phenolic acids	3316-09-4	3	201867	155075	163124	153011	167308	142774	691046	372305	763091	272685	224479	311298	197553	183183	203449	264610	265867	275933	C02235	-
Zbln008072	267.07	224.05	268.074	C16H12O4	[M-H]-	2-acetyl-7-methoxy-3H-benzo[f]chromen-3-one	Lignans and Coumarins	Coumarins	-	1	2.76081e+06	1.91813e+06	768521	20663.3	6239.32	28522.6	22787.7	27238.5	26489.6	1.71548e+06	2.0122e+06	1.92163e+06	3.00769e+06	2.14845e+06	4.41742e+06	2.41003e+06	2.3133e+06	2.4067e+06	-	-
Zmyn004449	309.21	171.1	310.214	C18H30O4	[M-H]-	9-Hydroxy-12-oxo-10(E),15(Z)-octadecadienoic acid	Lipids	Free fatty acids	-	2	788879	780562	561856	266439	636754	430805	2.18158e+06	2.11711e+06	2.59036e+06	2.41814e+06	2.66285e+06	2.38928e+06	2.81596e+06	3.21375e+06	3.33853e+06	1.76681e+06	1.8455e+06	1.83228e+06	C21923	ko00592,ko01110
Lmmn006306	293.21	293.21	294.219	C18H30O3	[M-H]-	Machilusolide D	Others	Lactones	-	3	1.39002e+07	1.70201e+07	1.63921e+07	1.30235e+07	6.84412e+07	1.82916e+07	8.72251e+06	1.20768e+08	1.04839e+07	8.14107e+06	7.95006e+06	1.07957e+07	1.09807e+07	9.8664e+06	1.12781e+07	1.82733e+07	1.91137e+07	1.88965e+07	-	-
MWS201391	246.15	166.09	245.138	C10H19N3O4	[M+H]+	Asn-Ile	Amino acids and derivatives	Amino acids and derivatives	438533-59-6	2	9.5355e+06	5.32448e+06	2.1148e+07	265246	2.62655e+06	319651	859903	2.46579e+06	595454	983623	1.13744e+06	1.42759e+06	819294	568610	762916	2.75879e+06	2.6353e+06	2.67942e+06	-	-
Lacp005409	299.09	284.07	298.084	C17H14O5	[M+H]+	MelimesSanol C	Lignans and Coumarins	Coumarins	-	1	1.9652e+07	1.97676e+07	1.39141e+07	117090	105240	104352	197457	174791	170407	2.47294e+07	3.4516e+07	2.66396e+07	4.64679e+07	3.79045e+07	4.64977e+07	2.15894e+07	2.13762e+07	2.23443e+07	-	-
Lmwp003442	449.11	287.06	448.101	C21H20O11	[M+H]+	Amoenin	Flavonoids	Flavonols	-	3	424830	1.36041e+06	2798910	9	9	9	133200	86700	91903.9	381690	145851	167221	60020	206820	105283	649815	628055	621533	-	-
Zadp006809	275.2	119.08	274.193	C18H26O2	[M+H]+	3β,12-dihydroxy-13-methyl-podocarpane-8,10,13-tiene	Terpenoids	Ditepenoids	-	3	1.10658e+07	1.06373e+07	1.80415e+07	1.72056e+06	5.88816e+06	3.71628e+06	5.64445e+06	1.02619e+07	7.42842e+06	1.99906e+07	1.47761e+07	1.72444e+07	1.41188e+07	1.37851e+07	1.7397e+07	1.41151e+07	1.39258e+07	1.45722e+07	-	-
Lkmn122710	345.1	96.96	346.109	C15H22O7S	[M-H]-	9-(hydroxymethyl)-3,5a-dimethyl-2-oxo-2,3,3a,4,5,5a,6,7,9a,9b-decahydronaphtho[1,2-b]furan-6-yl hydrogen sulfate	Terpenoids	Sesquiterpenoids	-	2	1.18527e+06	2.12782e+06	3.09675e+06	9	9	9	9	9	9	1.58854e+06	1.80197e+06	1.04051e+06	492731	885081	263763	716425	700184	683611	-	-
MWSmce199	149.05	59.02	150.053	C5H10O5	[M-H]-	L-Xylose*	Others	Saccharides	609-06-3	2	8.45776e+06	6.70774e+06	7.63427e+06	1.8984e+07	1.61392e+07	1.70989e+07	1.19366e+07	1.07557e+07	1.09568e+07	6.60903e+06	7.60261e+06	8.24939e+06	5.63009e+06	5.86155e+06	7.36184e+06	1.31456e+07	1.28752e+07	1.25427e+07	C01510	-
Wbtn006715	301.04	151	302.043	C15H10O7	[M-H]-	1,2,4,5,8-pentahydroxy-6-methylanthracene-9,10-dione*	Flavonoids	Other Flavonoids	-	1	2828.08	3340	4341.34	7627.71	14607.9	18708.6	2.0323e+06	199347	2.89865e+06	3.81454e+06	1.80461e+06	2.05757e+06	571184	361945	956936	801367	786636	824246	-	-
mws1290	593.13	285.04	594.137	C30H26O13	[M-H]-	Kaempferol-3-O-(6''-p-Coumaroyl)glucoside (Tiliroside)	Flavonoids	Flavonols	20316-62-5	2	4.34847e+06	1.25984e+06	7.24945e+06	608011	762977	1.01953e+06	503404	644529	237728	3.37428e+06	8.3837e+06	2.48894e+06	734600	6.06517e+06	912453	2.70833e+06	2.62481e+06	2.58644e+06	C17140	-
Qmyp122114	223.21	149.13	222.198	C15H26O	[M+H]+	Ent-7(11)-selinen-4-ol	Terpenoids	Sesquiterpenoids	-	3	1.09517e+06	1.04314e+06	680986	1.06062e+06	289817	1.1505e+06	1.13635e+06	1.09983e+06	1.0975e+06	925081	876671	890822	688734	753698	743879	637048	608811	616127	-	-
MWSmce686	197.05	135.04	198.053	C9H10O5	[M-H]-	Danshensu; Salvianic Acid A	Phenolic acids	Phenolic acids	76822-21-4	2	9	9	9	7.41434e+06	8.28083e+06	8.05175e+06	1.70916e+07	1.13411e+07	1.59349e+07	5.10556e+06	6.06147e+06	5.97984e+06	4.47634e+06	3.8946e+06	3.20054e+06	5.18291e+06	5.40728e+06	5.20212e+06	C22038	ko00350,ko01100
pmp000789	375.11	299.06	374.1	C19H18O8	[M+H]+	Casticin (5,3'-Dihydroxy-3,6,7,4'-Tetramethoxyflavone)	Flavonoids	Flavones	479-91-4	3	3393.7	4456.13	10353.8	343980	398468	427613	441569	534760	408745	212875	396147	212124	160040	165971	134970	207427	204513	214131	-	-
Wcsn010254	277.22	277.22	278.225	C18H30O2	[M-H]-	4-[3-(4,8-dimethylnona-3,7-dienyl)-3-methyloxiran-2-yl]butan-2-one	Others	Others	-	3	1.02261e+06	1.04637e+06	818114	302049	462213	378908	670605	677639	652830	1.04894e+06	974532	1.11573e+06	1.458e+06	1.14156e+06	1.13659e+06	1.01774e+06	1.06048e+06	1.01769e+06	-	-
pmp000608	493.13	331.08	492.127	C23H24O12	[M+H]+	Aurantio-obtusin-6-O-Glucoside	Quinones	Anthraquinone	129025-96-3	2	7.22196e+07	1.50904e+08	2.03884e+08	3.16394e+07	3.32569e+07	4.21446e+07	830785	789562	574473	1.61977e+06	691943	1.68092e+06	864788	946259	716475	3.54651e+07	3.56082e+07	3.70269e+07	C10303	-
Smpn009230	487.34	487.34	488.35	C30H48O5	[M-H]-	2,3,23-Trihydroxyolean-12-en-28-oic acid*	Terpenoids	Triterpene	-	3	4.04287e+06	6.08477e+06	510858	1.20029e+06	1.03888e+06	1.15846e+06	1.68238e+06	1.32959e+06	1.4343e+06	4.74969e+07	5.4064e+07	3.96543e+07	1.36726e+08	1.14942e+08	1.20838e+08	5.54208e+07	5.78862e+07	5.56865e+07	-	-
Wbmn009702	487.34	487.34	488.35	C30H48O5	[M-H]-	2,3,23-Trihydroxyurs-12-en-28-oic acid*	Terpenoids	Triterpene	-	3	4.04287e+06	6.08477e+06	510858	1.20029e+06	1.03888e+06	1.15846e+06	1.68238e+06	1.32959e+06	1.4343e+06	4.74969e+07	5.4064e+07	3.96543e+07	1.36726e+08	1.14942e+08	1.20838e+08	5.54208e+07	5.78862e+07	5.56865e+07	-	-
HX1314	231.14	121.1	230.131	C15H18O2	[M+H]+	Euryopsin-3-one	Terpenoids	Monoterpenoids	-	3	168137	161726	165134	46844.4	21022.6	105158	138776	48298.2	120153	179979	224101	186541	287572	284721	254574	198573	189766	197057	-	-
MWSHC20196	237.19	81.07	236.178	C15H24O2	[M+H]+	10α-Hydroxycadin-4-en-15-al	Terpenoids	Sesquiterpenoids	398147-37-0	2	1.83328e+06	1.6995e+06	1.98772e+06	119730	338266	765073	743903	877726	926736	2.28293e+06	1.99561e+06	2.12282e+06	2.37632e+06	2.49108e+06	2.46158e+06	1.90702e+06	1.84386e+06	1.8198e+06	-	-
HJN012	377.16	329.14	378.168	C20H26O7	[M-H]-	4,7,9,9'-Tetrahydroxy-3,3'-dimethoxy-8-O-4'-neolignan	Phenolic acids	Phenolic acids	-	1	108499	52515.1	52772.2	383986	605346	580257	7.87708e+06	7.41989e+06	8.69187e+06	3.5296e+06	3.35535e+06	4.54046e+06	1.60441e+06	2.07451e+06	1.97658e+06	2.21424e+06	2.14235e+06	2.11244e+06	-	-
mws0224	150.06	61.01	149.051	C5H11NO2S	[M+H]+	DL-Methionine	Amino acids and derivatives	Amino acids and derivatives	59-51-8	3	9.34178e+06	9.63999e+06	1.14465e+07	847590	2.09333e+06	774434	9.80797e+06	184983	8.60993e+06	3.24306e+07	3.25038e+07	2.94203e+07	4.95591e+07	3.8631e+07	4.46101e+07	2.32761e+07	2.41214e+07	2.43901e+07	C01733	-
Wcfn002460	211.06	148.02	212.069	C10H12O5	[M-H]-	2,3-Dihydroxy-1-(4'-hydroxy-3'-methoxyphenyl)-propan-1-one	Others	Others	-	1	960712	758306	703072	2.72515e+06	2.49073e+06	3.25528e+06	6.4658e+06	1.38484e+07	9.20686e+06	2.86775e+06	2.91878e+06	4.0835e+06	1.12377e+06	1.34411e+06	1.68911e+06	3.04216e+06	2.91016e+06	2.92662e+06	-	-
Lazn002744	211.06	148.02	212.069	C10H12O5	[M-H]-	C-Veratroylglycol	Phenolic acids	Phenolic acids	168293-10-5	3	960712	758306	703072	2.72515e+06	2.49073e+06	3.25528e+06	6.4658e+06	1.38484e+07	9.20686e+06	2.86775e+06	2.91878e+06	4.0835e+06	1.12377e+06	1.34411e+06	1.68911e+06	3.04216e+06	2.91016e+06	2.92662e+06	-	-
MWSHC20168	153.02	109.03	154.027	C7H6O4	[M-H]-	Methyl cumalate	Phenolic acids	Phenolic acids	6018-41-3	1	6.79005e+06	7.01516e+06	3.66921e+06	1.1056e+07	1.66162e+07	1.4687e+07	7.78607e+07	7.48537e+07	8.78496e+07	1.70693e+07	1.58573e+07	1.97196e+07	9.83584e+06	8.25761e+06	1.16281e+07	2.31226e+07	2.38578e+07	2.27455e+07	-	-
Lafp004684	363.14	215.11	362.136	C19H22O7	[M+H]+	Janerin	Terpenoids	Sesquiterpenoids	64205-84-1	2	422555	1.05543e+06	727096	22338	22275.9	31761.1	40801	32678.9	82951.5	282461	111380	89097.4	207803	231351	756079	255348	248742	243234	-	-
mws1349	302.31	109.1	301.298	C18H39NO2	[M+H]+	Dihydrosphingosine	Lipids	Sphingolipids	764-22-7	3	13186.4	14689.4	8652.07	2.94511e+06	1.05767e+06	787238	883581	1.34246e+06	1.15097e+06	265775	375246	366340	182371	406389	243801	532511	508269	513818	C00836	ko00600,ko01100
Zmhn001358	299.08	137.02	300.084	C13H16O8	[M-H]-	4-O-Glucosyl-4-hydroxybenzoic acid	Phenolic acids	Phenolic acids	-	1	1.73852e+07	2.37338e+07	2.463e+07	3.60303e+06	3.08855e+06	4.41188e+06	9220.39	12002.5	5998.23	5662.08	13047.5	18289.2	8339.56	2846.84	10382.4	4.55763e+06	4.52443e+06	4.35243e+06	-	-
Lmqn006260	301.04	151	302.043	C15H10O7	[M-H]-	2',3',4',5,7-Pentahydroxyflavone*	Flavonoids	Flavones	-	1	14172.7	3612.77	9338.4	10370.4	20229.3	5871.94	1.91465e+06	204002	2.82495e+06	3.74696e+06	1.80861e+06	2.0292e+06	558247	376510	963827	809404	795592	770880	-	-
Ymjm000148	299.11	137.02	300.121	C14H20O7	[M-H]-	Salidroside	Phenolic acids	Phenolic acids	10338-51-9	2	1.87744e+07	2.63793e+07	2.70752e+07	3.90158e+06	3.62211e+06	4.92248e+06	5222.61	16214.9	11186.4	10958.8	11870.6	16307.2	5374.03	8389.09	13888.9	5.26843e+06	5.01744e+06	5.11422e+06	C06046	ko00350,ko01100
Wcdp000380	104.11	60.08	103.1	C5H13NO	[M+H]+	L-Valinol	Amino acids and derivatives	Amino acids and derivatives	2026-48-4	1	719990	625095	1.1518e+06	2.80968e+06	1.71991e+06	1.59275e+06	1.34851e+06	1.28437e+06	1.39055e+06	1.06147e+06	1.14116e+06	1.13513e+06	958272	956392	1.07254e+06	1.19732e+06	1.25535e+06	1.21222e+06	-	-
Lmbn013410	205.16	189.127	206.167	C14H22O	[M-H]-	2,4-Di-Tert-Butylphenol*	Phenolic acids	Phenolic acids	96-76-4	1	3.09407e+06	2.94693e+06	2.53051e+06	3.1909e+06	2.88163e+06	2.80049e+06	3.27162e+06	2.46296e+06	3.39674e+06	3.1184e+06	2.76861e+06	2805657	3.06053e+06	3.09396e+06	2.72946e+06	2.78144e+06	2.75387e+06	2.65338e+06	-	-
Lakn002075	431.12	137.02	432.127	C18H24O12	[M-H]-	4-Hydroxybenzoic acid glucosyl xyloside	Phenolic acids	Phenolic acids	-	2	3.68081e+06	1.99226e+06	3.74633e+06	2.49037e+06	2.94349e+06	3.37253e+06	258336	211277	395282	133332	177490	212306	229714	248618	73740.6	1.03178e+06	1.04534e+06	1.08212e+06	-	-
MWS5164	203.15	70.07	202.143	C8H18N4O2	[M+H]+	N,N'-Dimethylarginine;SDMA*	Amino acids and derivatives	Amino acids and derivatives	30344-00-4	3	5.99998e+06	5.5103e+06	5.89893e+06	1.53744e+06	2.31926e+06	1.7559e+06	2.18279e+06	1.11124e+06	2.00764e+06	5.09066e+06	3.05827e+06	4.8581e+06	4.23237e+06	3.92342e+06	3.66122e+06	4.84645e+06	4.70181e+06	4.93877e+06	-	-
NK10251888	203.15	70.07	202.143	C8H18N4O2	[M+H]+	NG,NG-Dimethyl-L-arginine*	Amino acids and derivatives	Amino acids and derivatives	30315-93-6	3	5.99998e+06	5.5103e+06	5.89893e+06	1.53744e+06	2.31926e+06	1.7559e+06	2.18279e+06	1.11124e+06	2.00764e+06	5.09066e+06	3.05827e+06	4.8581e+06	4.23237e+06	3.92342e+06	3.66122e+06	4.84645e+06	4.70181e+06	4.93877e+06	C03626	-
Qmjp081206	233.15	187.15	232.146	C15H20O2	[M+H]+	Isogermafurenolide	Terpenoids	Sesquiterpenoids	-	1	45731.8	72513.8	63617.7	1.83386e+06	8.79184e+06	7.3012e+06	1.29833e+07	1.3773e+07	1.16427e+07	1.82247e+06	4.18581e+06	2.61217e+06	556314	866288	472619	3.40702e+06	3.45893e+06	3.29441e+06	-	-
MWS1839	165.06	92.03	166.063	C9H10O3	[M-H]-	Ethylparaben	Phenolic acids	Phenolic acids	120-47-8	3	31536.2	29314.4	24481	49574.7	63118.5	59668.5	936911	722018	943196	1.40979e+06	1.43899e+06	1.38186e+06	1.48074e+06	1.36931e+06	1.70955e+06	961545	979140	1.00994e+06	-	-
mws0458	151.04	136.02	152.047	C8H8O3	[M-H]-	Vanillin; 4-Hydroxy-3-Methoxybenzaldehyde	Others	Aldehyde compounds	121-33-5	3	1.7177e+06	1.5521e+06	1.42576e+06	1.52055e+06	2.2345e+06	1.53592e+06	3.56123e+06	1.08229e+07	3.56887e+06	1.5111e+06	1257471	3.85485e+06	2112220	1.6524e+06	1.91961e+06	2.49523e+06	2.61043e+06	2.50756e+06	C00755	ko00996,ko01100,ko01110
Qatp004010	249.15	157.1	248.141	C15H20O3	[M+H]+	Micheliolide	Terpenoids	Sesquiterpenoids	68370-47-8	2	158374	331158	240427	588839	820699	697949	245050	351691	309294	322722	291754	295325	233682	326598	286601	294768	309159	298275	C09507	-
Lmgn000224	145.01	57.03	146.022	C5H6O5	[M-H]-	2-Methyl-3-oxosuccinic acid	Organic acids	Organic acids	-	3	322805	255664	166955	261107	254746	345926	15725.1	42555.2	34505.3	12864.8	14844.5	15843.5	64689.1	62523.3	49226.9	69805.8	67415.7	70777.7	C06030	ko00660
MWSmce119	175.11	70.06	174.112	C6H14N4O2	[M+H]+	L-Arginine	Amino acids and derivatives	Amino acids and derivatives	74-79-3	1	1.28316e+08	4.0785e+07	6.012e+07	4.86679e+08	2.03538e+08	1.67709e+08	5.64055e+06	4.88666e+06	6.6525e+06	1.22534e+07	1.11654e+07	1.38952e+07	1.1034e+07	3.40352e+06	1.0379e+07	6.1316e+07	5.85471e+07	5.89862e+07	C00062	ko00220,ko00261,ko00330,ko00470,ko00970,ko01100,ko01110,ko01230,ko02010
Zmtn001624	188.04	144.05	189.043	C10H7NO3	[M-H]-	N-Acetylisatin	Alkaloids	Plumerane	574-17-4	1	9.932e+06	7.40761e+06	1.67263e+07	8.60276e+06	1.22149e+07	1.06394e+07	1.25108e+07	1.42114e+07	1.32589e+07	1.22036e+07	1.41434e+07	1.27899e+07	1.34755e+07	1.42895e+07	1.06999e+07	1.10155e+07	1.0667e+07	1.12074e+07	C02172	ko00380
ML10172161	103	59.01	104.011	C3H4O4	[M-H]-	Hydroxypyruvic acid	Organic acids	Organic acids	1113-60-6	3	3.15869e+07	3.75567e+07	3.29017e+07	3.09924e+06	5.88401e+06	3.53182e+06	350998	668800	265195	146692	161211	253939	285006	311093	623103	5.77743e+06	5.5099e+06	5.56716e+06	C00168	ko00260,ko00630,ko01100,ko01110,ko01200
Wcdp010716	337.27	95.09	336.266	C21H36O3	[M+H]+	Glycidyl Linoleate	Lipids	Glycerol ester	24305-63-3	1	574089	474127	1.8374e+06	942549	1.3601e+06	473046	112776	123641	153869	201888	173605	162760	169568	361911	627789	704154	707469	675686	-	-
pme0428	237.08	103.02	238.084	C12H14O5	[M-H]-	3,4,5-Trimethoxycinnamic acid	Phenolic acids	Phenolic acids	90-50-6	3	206269	113079	22262.8	133861	134972	131502	120157	635871	106171	170898	200493	227359	380301	277351	478656	236350	247221	246627	-	-
pme2289	287.24	119.09	286.23	C20H30O	[M+H]+	Retinol (Vitamin A1)	Others	Vitamin	68-26-8	3	408833	370547	345526	236872	71973.4	65435.8	51890.2	32280	44617	244595	171174	254734	167251	372998	307211	129201	122874	125603	C00473	ko01100,ko01240
Yxxp005044	357.13	137.06	356.126	C20H20O6	[M+H]+	Balanophonin	Lignans and Coumarins	Lignans	118916-57-7	3	1.21982e+06	796311	1.86006e+06	6.73402e+06	5.38808e+06	6.81295e+06	2.27692e+07	1.97495e+07	2.14207e+07	6.92579e+06	6.25018e+06	1.02225e+07	3.4921e+06	4.14162e+06	3.85248e+06	6.08678e+06	6.05717e+06	5.81156e+06	-	-
Ylyn011765	483.3	483.31	484.319	C30H44O5	[M-H]-	cangoronine	Terpenoids	Triterpene	138884-84-1	2	132941	196957	193634	417000	349429	355330	516778	512779	443719	1.33904e+06	1.41937e+06	915738	2.95113e+06	2.38934e+06	1.91896e+06	1.20497e+06	1.15454e+06	1.15284e+06	-	-
Hmcn002743	417.15	181.04	418.163	C22H26O8	[M-H]-	Lirioresinol A	Lignans and Coumarins	Lignans	-	2	808901	540328	768800	3.42382e+06	2.89065e+06	3.58291e+06	1.06647e+07	1.15013e+07	1.19804e+07	4.99106e+06	4.8428e+06	5.70481e+06	3.9871e+06	3.92053e+06	3.98353e+06	3.83962e+06	3.66295e+06	3.69308e+06	-	-
MWS201449	246.14	141.1	245.138	C10H19N3O4	[M+H]+	Asn-Leu	Amino acids and derivatives	Amino acids and derivatives	22601-71-4	2	7.20069e+06	3.83894e+06	1.52538e+07	193516	1.83617e+06	206311	539471	1.53695e+06	468309	541451	661081	844553	532147	296749	463796	2.10213e+06	1.99852e+06	2.04519e+06	-	-
MWS5231	243.16	181.16	244.167	C13H24O4	[M-H]-	Tridecanedioic acid	Lipids	Free fatty acids	505-52-2	1	2.75117e+06	2.7177e+06	3.05886e+06	3.55017e+06	3.61221e+06	3.64924e+06	3.76077e+06	3.87195e+06	3.91694e+06	3.27061e+06	3.05486e+06	3.26499e+06	2.9543e+06	3.08226e+06	3.23211e+06	3.36923e+06	3.28909e+06	3.20262e+06	-	-
mws0160	181.05	109.03	182.058	C9H10O4	[M-H]-	3,4-Dihydroxybenzoic Acid Ethyl Ester (Protocatechuic acid ethyl ester)	Phenolic acids	Phenolic acids	3943-89-3	3	39207.3	42460.3	8098.46	49357.8	40884.8	58518.2	806830	618081	1.0237e+06	300156	283024	355013	149728	173778	192072	227362	219897	216381	-	-
Lmhn002629	253.04	121.03	254.043	C11H10O7	[M-H]-	Benzoyltartaric acid	Phenolic acids	Phenolic acids	-	1	1.59043e+08	1.98042e+08	2.72953e+08	955307	629214	686750	83365	121336	79045.9	329332	261135	337070	83529.6	158584	150747	3.42112e+07	3.32389e+07	3.49656e+07	-	-
mws5038	341.109	89.0249	342.116	C12H22O11	[M-H]-	Isomaltulose*	Others	Saccharides	13718-94-0	1	523088	492262	378765	405758	228767	234680	9	9	9	9103.9	13860.3	6502.6	4332.16	3340	7796.6	480243	498910	475691	C01742	-
Lamp007647	257.08	137.02	256.073	C15H12O4	[M+H]+	2',4,4'-Trihydroxychalcone*	Flavonoids	Chalcones	-	1	4.08851e+07	4.09518e+07	19814161	1.83656e+06	1.35079e+06	1.67566e+06	1.58416e+06	1.44328e+06	1.11737e+06	2.01403e+07	2.82034e+07	2.56281e+07	2.70197e+07	2.57984e+07	3.50496e+07	2.69062e+07	2.64223e+07	2.55862e+07	-	-
Lmjp007881	235.17	161.14	234.162	C15H22O2	[M+H]+	Artemisinic acid	Terpenoids	Sesquiterpenoids	80286-58-4	2	656720	776410	721379	517621	577000	524996	1.76646e+06	928701	2.46042e+06	502726	523173	540357	424583	413907	682720	750206	734368	713053	C20309	-
MA10039641	341.11	89.02	342.116	C12H22O11	[M-H]-	D-Lactose*	Others	Saccharides	63-42-3	1	569440	449644	489755	467884	249113	235239	19811.7	9767.13	10266.3	16961.2	20439.8	10784.1	8181.45	9	15168.4	472599	496169	490997	C01970	-
Wasn003938	283.08	121.03	284.09	C13H16O7	[M-H]-	Benzoyl-Beta-D-Glucoside	Phenolic acids	Phenolic acids	-	3	300533	307880	275801	205445	796314	208292	99260.9	81345.8	207183	179181	190758	189572	184307	160334	143949	220453	230200	230738	-	-
Wasn005621	361.19	199.13	362.194	C17H30O8	[M-H]-	Glucosyl 9-hydroxy-3-methyldec-2-enoic acid	Others	Others	-	3	240666	646118	813609	401984	343140	540226	115811	30156.4	36548.9	255412	255991	301939	1.21519e+06	1.13769e+06	1.06444e+06	685461	661845	695797	-	-
WaYn002313	373.11	193.05	374.121	C16H22O10	[M-H]-	Homosyringic Acid 4'-O-Glucoside	Phenolic acids	Phenolic acids	-	1	1.04962e+06	1.00103e+06	1.86175e+06	1.74208e+07	9.19274e+06	1.46671e+07	45008.8	31468.5	103308	66289.4	54743.8	83838.8	55501.2	38091.9	15911	2.45276e+06	2.40187e+06	2.33089e+06	-	-
MWS201442	267.13	120.08	266.127	C13H18N2O4	[M+H]+	Phe-Thr	Amino acids and derivatives	Amino acids and derivatives	51352-44-4	2	2.07464e+06	2.02248e+06	6.47551e+06	164942	2.00561e+06	136672	4.09686e+06	2.46978e+06	3.22434e+06	4.77539e+06	5.00177e+06	6.73613e+06	5.52281e+06	4.12728e+06	5.04242e+06	5.37145e+06	5.11523e+06	5.31649e+06	-	-
Zmcp102206	381.2	299.2	382.214	C24H30O4	[M-H]-	(Z)-3,8-Dihydro 6,6·;7,3'a-diligustilide	Others	Others	-	2	57304.7	281076	47655.4	102904	194119	100474	2.1799e+06	1.88144e+06	2.11912e+06	2.90501e+06	3.03329e+06	2.81421e+06	2.9059e+06	2.66298e+06	2.8658e+06	2.11848e+06	2.21944e+06	2.21097e+06	-	-
pmb2636	335.22	253.18	336.23	C20H32O4	[M-H]-	8,15-Dihydroxy-5,9,11,13-eicosatetraenoic acid	Lipids	Free fatty acids	77667-08-4	3	162764	176341	212459	262947	308071	228196	878687	789838	816071	659183	649324	711535	879181	922448	676692	605009	574891	587686	-	-
ML10177402	152.03	108.05	153.043	C7H7NO3	[M-H]-	4-Aminosalicylic acid	Phenolic acids	Phenolic acids	65-49-6	3	155575	182615	177425	128389	126332	65487.7	50719.7	156075	177582	182204	149212	153708	222428	169971	185369	155145	147519	150110	C02518	-
MWS2058	151.04	107.05	152.047	C8H8O3	[M-H]-	3-Methylsalicylic Acid	Phenolic acids	Phenolic acids	83-40-9	3	169798	131794	90724.2	129921	102330	89650.8	143761	132267	154387	96158	156046	110237	177836	159860	157677	148305	144941	152563	C14088	-
Wcgp010436	275.2	105.07	274.193	C18H26O2	[M+H]+	3-(Cyclohexen-1-yl)-2-hydroxy-4a,5-dimethyl-2,3,4,5,6,8a-hexahydronaphthalen-1-one	Others	Others	-	3	1.8917e+07	1.44378e+07	2.46876e+07	1.84469e+06	1.27664e+07	2.90906e+06	7.18539e+06	1.09926e+07	6.51232e+06	2.49379e+07	2.23227e+07	2.97813e+07	1.96846e+07	1.97364e+07	2.36462e+07	2.49501e+07	2.6233e+07	2.58834e+07	-	-
mws0636	313.15	166.09	312.147	C18H20N2O3	[M+H]+	L-Phenylalanyl-L-phenylalanine	Amino acids and derivatives	Amino acids and derivatives	2577-40-4	1	218944	267166	434106	22247	161884	76301.4	751776	340119	819287	933764	991866	1.14056e+06	789348	672356	845429	761571	751022	789589	-	-
mws0612	195.07	121.03	196.074	C10H12O4	[M-H]-	3,4-Dimethoxyphenyl acetic acid	Phenolic acids	Phenolic acids	93-40-3	2	48345	38345	51639.5	50504.7	151857	71690	1.90695e+06	1.67194e+06	2.28323e+06	2.37683e+07	2.27003e+07	2.19726e+07	2.99502e+07	2.66257e+07	2.56861e+07	1.52946e+07	1.48409e+07	1.45246e+07	-	-
Hmqn004825	293.21	275.2	294.219	C18H30O3	[M-H]-	Rabdosia acid A	Lipids	Free fatty acids	-	3	5.05332e+06	4.69293e+06	7.32808e+06	1.45808e+06	3.72131e+06	1.50763e+06	936959	5.84592e+06	1.07277e+06	2.44686e+06	1.8038e+06	2.16189e+06	1.53541e+06	1.4073e+06	1.57793e+06	2.5552e+06	2.49822e+06	2.42584e+06	-	-
Wchn004015	195.07	150.03	196.074	C10H12O4	[M-H]-	3-Hydroxy-1-(4'-hydroxy-3'-methoxyphenyl)-propan-1-one	Others	Others	-	1	357612	268276	537793	2.38671e+06	2.41193e+06	2.76971e+06	1.23303e+07	1.70606e+07	1.01312e+07	7.89395e+06	6.28938e+06	8.42586e+06	4.0024e+06	4.66617e+06	4.54586e+06	4.21274e+06	4.14203e+06	4.00214e+06	-	-
Lmcp000282	162.11	85.03	161.105	C7H15NO3	[M+H]+	L-Carnitine	Alkaloids	Alkaloids	541-15-1	3	2.85933e+06	2.71689e+06	1.76385e+06	4.49071e+06	4.71005e+06	6.8371e+06	3.42789e+06	2.64107e+06	2.65087e+06	2.94244e+06	2.94862e+06	2.8383e+06	3.41711e+06	3.13458e+06	3.39835e+06	2.697e+06	2.78414e+06	2.64458e+06	C00318	-
mws2212	179.03	135.05	180.042	C9H8O4	[M-H]-	Caffeic acid	Phenolic acids	Phenolic acids	331-39-5	1	41524.7	48491.8	22400.6	2.20587e+06	2.32126e+06	2.11675e+06	6.70318e+06	4.89253e+06	6.71031e+06	1.73563e+06	1.85109e+06	1.90903e+06	1.40489e+06	967125	759823	1.87783e+06	1.90952e+06	1.97589e+06	C01197	ko00940,ko01100,ko01110
MWSslk225	133.06	77.04	132.058	C9H8O	[M+H]+	1-Indanone	Others	Ketone compounds	83-33-0	3	1.48784e+06	3.70865e+06	2.80805e+06	1.3045e+06	1.23244e+06	542301	2.77269e+06	3.66319e+06	3.24713e+06	3.93218e+06	4.30142e+06	3.63696e+06	4.1583e+06	4.01974e+06	3.36947e+06	3.49103e+06	3.4391e+06	3.31712e+06	C01504	-
Yalp008047	291.23	93.07	290.225	C19H30O2	[M+H]+	Methyl 12-phenyldodecanoate	Lipids	Free fatty acids	38795-65-2	1	5.96366e+07	5.5217e+07	5.80488e+07	3.00246e+06	4.13597e+06	7.98958e+06	2.87386e+06	2.04964e+06	2.53563e+06	2.31006e+07	1.90552e+07	1.81572e+07	22873547	2.18232e+07	2.35452e+07	2.34119e+07	2.43464e+07	2.46173e+07	-	-
mws0098	160.04	116.05	161.048	C9H7NO2	[M-H]-	Indole-2-carboxylic acid	Alkaloids	Plumerane	1477-50-5	3	60681.8	83547.8	21861.6	121271	137547	118952	486130	180199	428826	408090	411083	417912	419917	394377	356643	226804	216250	225883	-	-
Wbtn007675	285.04	285.04	286.048	C15H10O6	[M-H]-	Calyxanthone	Flavonoids	Other Flavonoids	98973-45-6	3	252827	305110	3.14372e+06	71681.1	78483.7	256225	6.42717e+06	573571	2.24102e+06	3.28186e+07	1.71594e+07	1.39101e+07	3.70663e+06	3.07218e+06	4.641e+06	6.15825e+06	6.24921e+06	5.93716e+06	-	-
MA10107783	207.03	119.05	208.037	C10H8O5	[M-H]-	3-[(1-Carboxyvinyl)oxy]benzoic acid	Phenolic acids	Phenolic acids	16929-37-6	3	560445	869535	218066	480818	609535	445008	408030	682967	437284	409318	452939	525871	868269	709791	952838	703849	730215	694178	C20772	ko00130,ko01100,ko01110,ko01240
Zmhn003257	299.06	284.04	300.063	C16H12O6	[M-H]-	5,7,2'-Trihydroxy-8-methoxyflavone*	Flavonoids	Flavones	-	1	1.69072e+06	1.55767e+06	1.59195e+06	609977	652128	736584	848168	845375	762427	9.04772e+06	8.7172e+06	8.44591e+06	1.3e+07	1.11035e+07	1.02489e+07	7.66518e+06	7.29154e+06	7.37596e+06	-	-
mws0147	117.06	59.01	118.063	C5H10O3	[M-H]-	β-Hydroxyisovaleric acid	Organic acids	Organic acids	625-08-1	3	3.01261e+06	3.3619e+06	2.21963e+06	2.12466e+06	5.45489e+06	3.31361e+06	3.42001e+06	4.65965e+06	3.88016e+06	3.87634e+06	3.72424e+06	3.60569e+06	4.25244e+06	4.4949e+06	3.75652e+06	3.51974e+06	3.35049e+06	3.38221e+06	C20827	ko00280,ko01100
mws1014	209.04	149.02	208.037	C10H8O5	[M+H]+	Fraxetin (7,8-Dihydroxy-6-methoxycoumarin)	Lignans and Coumarins	Coumarins	574-84-5	3	934466	1.22103e+06	2154515	2.20783e+06	1.50203e+06	546920	9.0616e+06	6.27183e+06	9.68851e+06	1.98913e+07	2.00917e+07	1.99878e+07	2.72491e+07	24690037	2.34296e+07	1.36503e+07	1.3335e+07	1.29503e+07	C09265	ko00999,ko01110
MWS4295	299.26	253.25	300.266	C18H36O3	[M-H]-	DL-2-hydroxystearic acid*	Lipids	Free fatty acids	629-22-1	1	133494	107792	127016	74498.6	83485.5	77316	509383	104357	493041	322662	321129	232827	321157	362916	431250	1.53531e+06	1.58076e+06	1.4997e+06	-	-
mws0061	463.09	300.03	464.096	C21H20O12	[M-H]-	Quercetin-3-O-galactoside (Hyperin)	Flavonoids	Flavonols	482-36-0	1	3.41696e+06	1.69472e+06	1.65462e+07	1.96802e+06	1.15402e+07	1.41298e+07	1.58364e+06	579413	1.19565e+06	735602	418240	689403	338246	179597	184069	4.22915e+06	4.24582e+06	4.04699e+06	C10073	-
pmn001367	315.072	153.017	316.079	C13H16O9	[M-H]-	Protocatechuic acid-4-O-glucoside*	Phenolic acids	Phenolic acids	-	1	5.93477e+06	4.83359e+06	9.43131e+06	6.67782e+07	5.82469e+07	8.29407e+07	377065	254483	348764	578665	606115	692567	856143	337536	254054	1.80096e+07	1.88056e+07	1.8907e+07	-	-
Hmlp005803	271.1	121.03	270.089	C16H14O4	[M+H]+	4,4'-dihydroxy-2'-methoxychalcone	Flavonoids	Chalcones	-	3	645681	148432	176780	192960	746960	446268	348441	619843	447372	343345	357046	520417	320357	245721	246722	279362	290919	276929	-	-
Lazn003953	539.21	491.19	540.221	C26H36O12	[M-H]-	Erythro-Guaiacylglycerol-β-dihydroconiferyl Ether glucoside	Lignans and Coumarins	Lignans	-	1	152822	171868	299507	1.34226e+07	9.69177e+06	8.66237e+06	72855.9	94812.4	61235.7	35348.8	17584.2	37705.4	14809.9	25005	11553.3	1.45992e+06	1.539e+06	1.49314e+06	-	-
Hagn002504	355.07	85.03	356.09	C19H16O7	[M-H]-	5,7,5'-Trimethoxy-3',4'-methylenedioxyflavonoid	Flavonoids	Flavones	-	2	1.63938e+06	833515	3.16164e+06	209255	2598540	2.77668e+06	491663	261083	392352	1.66093e+06	1.13718e+06	1.31844e+06	552969	293708	510945	1.05314e+06	1.07631e+06	1.02081e+06	-	-
Zmsp001773	268.11	136.07	267.097	C10H13N5O4	[M+H]+	(2r,3s,4r,5s)-2-(6-aminopurin-9-yl)-5-(hydroxymethyl)oxolane-3,4-diol	Nucleotides and derivatives	Nucleotides and derivatives	-	1	9.28668e+07	9.39925e+07	102034888	1.99294e+07	3.25814e+07	1.91102e+07	5.48207e+06	1.26582e+07	1.11828e+07	5.9908e+06	8.16633e+06	1.22147e+07	1.28939e+07	1.00814e+07	4.28931e+07	2.40064e+07	2.51037e+07	2.51873e+07	-	-
Laln002027	431.12	137.02	432.127	C18H24O12	[M-H]-	3,4-dihydroxybenzaldehyde-xylose-glucoside	Phenolic acids	Phenolic acids	-	1	3.49438e+06	2.05831e+06	3.66767e+06	2.36779e+06	2.69326e+06	3.38328e+06	259035	215026	395394	145605	162197	202570	215058	260295	69958.7	1.13391e+06	1.07819e+06	1.0896e+06	-	-
pme2074	322.2	130.05	323.21	C18H29NO4	[M-H]-	Jasmonoyl-L-Isoleucine	Amino acids and derivatives	Amino acids and derivatives	120330-93-0	3	1.76998e+06	1.59747e+06	431368	360819	383767	333684	415372	334069	377925	1.82592e+06	1.83056e+06	1.35939e+06	1.48239e+06	1.34778e+06	1.52899e+06	1.25154e+06	1.30225e+06	1.23812e+06	C18699	ko04075
Zmdn007764	269.05	225.06	270.053	C15H10O5	[M-H]-	isoemodin	Quinones	Anthraquinone	-	1	3.96413e+06	1.35459e+07	1.35349e+07	148055	60212	77483.8	135465	743156	124445	8.87113e+06	7.88377e+06	8.03365e+06	5.05648e+06	3.26385e+06	2.99707e+06	5.17443e+06	5.30724e+06	5.03039e+06	-	-
MWSslk055	345.1	315.06	344.09	C18H16O7	[M+H]+	Nevadensin	Flavonoids	Flavones	10176-66-6	2	21741.2	18904.2	14932.9	1.75401e+07	2.14798e+07	2.29469e+07	1.99133e+07	2.19117e+07	1.82711e+07	7.0992e+06	8.55619e+06	7.54726e+06	5.4336e+06	4.90538e+06	4.51206e+06	8.75071e+06	8.66875e+06	8.31757e+06	C10111	-
pmb2804	311.22	171.14	312.23	C18H32O4	[M-H]-	13S-Hydroperoxy-9Z,11E-octadecadienoic acid	Lipids	Free fatty acids	33964-75-9	3	3.36102e+06	3.32545e+06	3.67635e+06	2.33951e+06	7.23261e+06	2.47985e+06	5.39961e+06	2.49716e+07	5.8315e+06	5.13929e+06	5.08475e+06	5.51632e+06	3.50677e+06	3.75474e+06	5.04762e+06	4.87032e+06	4.8405e+06	5.08338e+06	C04717	ko00591,ko01100
pme0066	116.05	74.02	117.054	C3H7N3O2	[M-H]-	Guanidinoacetate	Alkaloids	Alkaloids	352-97-6	3	621218	841497	479292	83980.5	290748	186196	212098	829412	203257	735190	1.4713e+06	1.22162e+06	2.21176e+06	2.07932e+06	1.30739e+06	1.1377e+06	1.10438e+06	1.16536e+06	C00581	ko00260,ko00330,ko01100
Waln013216	299.26	141.13	300.266	C18H36O3	[M-H]-	10-Hydroxystearic Acid	Lipids	Free fatty acids	638-26-6	1	67192.3	42763.2	46435.4	49416.3	617308	40892.3	3.76246e+07	3.17717e+07	3.23871e+07	6.89129e+07	7.83484e+07	6.48476e+07	7.61705e+07	6.72993e+07	7.03839e+07	3.87759e+07	4.07153e+07	4.05661e+07	-	-
pmf0395	283.26	121.1	282.256	C18H34O2	[M+H]+	Oleic acid	Lipids	Free fatty acids	112-80-1	3	44119.9	44644.7	39344.2	140068	105078	112796	163667	149815	163064	126037	167585	123328	107647	164685	115242	116583	118244	122798	C00712	ko00061,ko00073,ko01040
Lsjp211254	423.36	203.18	422.355	C30H46O	[M+H]+	Lupa-1,20(29)-dien-3-one (Glochidone)	Terpenoids	Triterpene	-	1	3.17708e+07	3.24907e+07	3.6898e+07	719460	561117	676081	738648	315350	148296	8.96316e+06	8.35647e+06	8.53601e+06	6.58755e+06	9.62565e+06	7.51871e+06	1.41705e+07	1.48765e+07	1.4238e+07	-	-
Rfmb087	311.22	293.21	312.23	C18H32O4	[M-H]-	9-Hydroxy-13-oxo-10-octadecenoic Acid	Lipids	Free fatty acids	-	3	1.55452e+06	2.02722e+06	2.44119e+06	1.64432e+06	3.6885e+06	1.74484e+06	3.05638e+06	2.43408e+07	2.84927e+06	3.91413e+06	4.13412e+06	3.76883e+06	3.41956e+06	3.99897e+06	3.72835e+06	4.06505e+06	3.86796e+06	3.89403e+06	-	-
mws0242	173.08	111.08	174.089	C8H14O4	[M-H]-	Suberic Acid	Organic acids	Organic acids	505-48-6	1	1.71215e+06	1.7638e+06	976956	1.6976e+06	1.85687e+06	1.94008e+06	3.63573e+06	5.56806e+06	3.61672e+06	3.86069e+06	4.64338e+06	4.38382e+06	5.62016e+06	5165226	4.98602e+06	3.29123e+06	3.47269e+06	3.35802e+06	C08278	-
Wcdp000970	121.06	103.05	120.058	C8H8O	[M+H]+	acetophenone	Others	Others	98-86-2	2	56011.2	91668	94057.5	253665	115235	434446	5.04843e+06	3.32093e+06	4.69276e+06	1.10158e+07	1.20797e+07	1.12184e+07	1.35168e+07	1.11767e+07	1.37494e+07	5.80258e+06	5.82806e+06	6.0928e+06	C07113	-
mws0668	283.07	151.03	284.076	C10H12N4O6	[M-H]-	Xanthosine	Nucleotides and derivatives	Nucleotides and derivatives	146-80-5	1	1.23714e+07	1.00864e+07	1.02307e+07	1.12969e+06	6.18553e+06	4.73504e+06	247135	173202	285865	2.14137e+06	3.57412e+06	5.24934e+06	3.56525e+06	1.97459e+06	2.83595e+06	3.67093e+06	3.60651e+06	3.47913e+06	C01762	ko00230,ko00232,ko01100,ko01110,ko01232,ko02010
Lmfn000604	331.07	169.01	332.074	C13H16O10	[M-H]-	6-O-Galloyl-β-D-glucose*	Phenolic acids	Phenolic acids	13186-19-1	3	211793	212705	422481	1.73461e+06	1.62059e+06	4.19024e+06	18998.9	16809.5	36109.9	38845.5	32674.6	40721.5	26204.6	10503.1	13394.9	433687	414281	435138	-	-
Lmmp004504	287.06	153.02	286.048	C15H10O6	[M+H]+	2'-Hydroxygenistein	Flavonoids	Isoflavones	1156-78-1	1	3.49304e+06	3.79421e+06	9.30732e+06	234064	262960	320253	620455	655802	469650	2.32753e+07	2.37225e+07	2.05279e+07	2.55854e+07	2.38348e+07	2.14289e+07	1.55692e+07	1.58177e+07	1.64167e+07	C12134	ko00943
pmp000169	359.11	329.06	358.105	C19H18O7	[M+H]+	Andrographidine D aglycone	Flavonoids	Flavanones	-	3	39371.9	78061.6	43548.8	2.88488e+07	3.05459e+07	3.57863e+07	3.34198e+07	4.45685e+07	2.99547e+07	1.36582e+07	1.55471e+07	1.23868e+07	9.74707e+06	1.11087e+07	6.77084e+06	1.25313e+07	1.30398e+07	1.32137e+07	-	-
HJN056	557.24	509.22	558.246	C30H38O10	[M-H]-	Sesquimarocanol B	Phenolic acids	Phenolic acids	-	3	31203.6	13766.8	32186.7	31767.5	75234.5	100766	423828	311172	438666	293413	290101	404762	217207	199212	251197	165091	165485	157561	-	-
Lmhp001732	263.14	70.06	262.132	C14H18N2O3	[M+H]+	L-Prolyl-L-Phenylalanine	Amino acids and derivatives	Amino acids and derivatives	13589-02-1	2	369016	562268	1.16341e+06	1.525e+06	379635	327166	6.0549e+06	909130	5.63174e+06	7.85424e+06	7.06757e+06	1.05269e+07	4.16131e+06	3.74129e+06	5.15705e+06	5.45001e+06	5.54092e+06	5.24931e+06	-	-
mws0474	229.14	211.13	230.152	C12H22O4	[M-H]-	Dodecanedioic aicd	Lipids	Free fatty acids	693-23-2	1	228869	257770	238286	58546.1	64589.9	73698.4	254945	355097	231220	1.54828e+06	1.61766e+06	1.47507e+06	1.93316e+06	1.70356e+06	1.6686e+06	1.18337e+06	1.23177e+06	1.16885e+06	C02678	-
Lacp001431	268.15	136.06	267.147	C14H21NO4	[M+H]+	N-(3-hydroxy-4-methoxyphenethyl)-4-hydroxybutanamide	Alkaloids	Phenolamine	-	3	7.76978e+07	6.97795e+07	8.73329e+07	1.51073e+07	2.61162e+07	1.40194e+07	4.22119e+06	1.02613e+07	9.13085e+06	4.82858e+06	6.38014e+06	1.07078e+07	9.92966e+06	7.72492e+06	3.49002e+07	1.98256e+07	1.91877e+07	1.87695e+07	-	-
Lmmn003663	329.09	167.04	330.095	C14H18O9	[M-H]-	5-Glucosyloxy-2-Hydroxybenzoic acid methyl ester	Phenolic acids	Phenolic acids	-	3	1.02251e+06	730599	2.76083e+06	1.85051e+07	98071335	1.7014e+07	7.76148e+06	5.03409e+06	6.8929e+06	522002	388237	877834	80713.6	79406.8	129386	5.38687e+06	5.55027e+06	5.2526e+06	-	-
mws0093	179.07	146.04	180.079	C10H12O3	[M-H]-	Coniferyl alcohol	Phenolic acids	Phenolic acids	458-35-5	3	100535	51252.8	95002	9	9	9	757204	39610.8	650120	1.06899e+06	457056	650876	723755	838816	367068	323620	313359	306314	C00590	ko00940,ko00999,ko01100,ko01110
pme3207	141.02	59.01	142.027	C6H6O4	[M-H]-	Muconic acid	Organic acids	Organic acids	1119-72-8	3	4.37441e+06	5.57771e+06	6.2478e+06	7.62508e+06	5.79637e+06	7.69413e+06	7.51381e+06	7.55816e+06	5.7375e+06	4.17006e+06	4.21108e+06	4.37747e+06	6.70171e+06	7.3098e+06	4205645	4.40751e+06	4.50445e+06	4.26271e+06	C02480	ko01100
Wasn003258	293.12	131.07	294.132	C12H22O8	[M-H]-	Glucosyl 2-Hydroxy-4-Methylpentanoic Acid	Organic acids	Organic acids	-	1	8.90414e+06	9.08114e+06	1.14014e+07	5224125	7.09105e+06	4.97968e+06	62788.2	90425.2	63256.1	115267	148095	151631	135631	63179.2	130629	2.40802e+06	2.54395e+06	2.49677e+06	-	-
pme3382	160.06	98.02	161.069	C6H11NO4	[M-H]-	N-Acetyl-L-threonine	Amino acids and derivatives	Amino acids and derivatives	17093-74-2	1	782726	1.20796e+06	644619	254236	423748	318743	878939	1.13908e+06	865485	1.88286e+06	2.01821e+06	1.93634e+06	2.15551e+06	1973242	1.93878e+06	1.25609e+06	1.1978e+06	1.19662e+06	-	-
Lmjp005224	361.09	328.06	360.084	C18H16O8	[M+H]+	4',5,7-Trihydroxy-3',3,6-Trimethoxyflavone (Jaceidin)	Flavonoids	Flavones	10173-01-0	2	31675	13145.4	22365.5	3.05239e+06	2.90558e+06	2.84968e+06	3.28798e+06	4.08e+06	3.1029e+06	1.27344e+06	1.30013e+06	1.13069e+06	893950	815398	712910	1.32356e+06	1.36895e+06	1.39933e+06	-	-
Zbdn001947	301.09	123.01	302.1	C13H18O8	[M-H]-	Isotachioside*	Phenolic acids	Phenolic acids	31427-08-4	2	913838	793823	955725	9.83717e+06	1.96498e+06	7.51601e+06	17518.8	82351	41003.6	56633.2	82841.1	66748.7	79732	39088.2	11443.7	509730	519689	538583	-	-
Lmgp002593	123.04	77.04	122.037	C7H6O2	[M+H]+	3-hydroxybenzaldehyde	Phenolic acids	Phenolic acids	100-83-4	3	362176	272510	184646	370485	314319	254607	2.46058e+06	1.49132e+06	2.78972e+06	1.95734e+06	1.91491e+06	1.89402e+06	1.86154e+06	1.76581e+06	1.64536e+06	1.37707e+06	1.43023e+06	1.45512e+06	C03067	-
Zmcp102605	219.17	149.1	218.167	C15H22O	[M+H]+	Nootkatone	Terpenoids	Sesquiterpenoids	4674-50-4	1	410836	287254	318615	2.73755e+07	1.98768e+07	1.80679e+07	1.77225e+07	2.03057e+07	2.31561e+07	1.69108e+07	9.76624e+06	8.43103e+06	5.57254e+06	1.37633e+07	4.54975e+06	9.58711e+06	9.27365e+06	9.06766e+06	C17914	-
mws0885	153.02	109.03	154.027	C7H6O4	[M-H]-	2,4-Dihydroxybenzoic acid	Phenolic acids	Phenolic acids	89-86-1	2	173815	155174	905602	93147.9	290326	117372	4.81821e+06	282856	4.69845e+06	1.16739e+07	1.17584e+07	1.08181e+07	1.28263e+07	1.22607e+07	1.23036e+07	7.34922e+06	6.9831e+06	7.31877e+06	-	-
MWSHY0159	255.07	137.03	254.058	C15H10O4	[M+H]+	6,2'-Dihydroxyflavone	Flavonoids	Flavones	92439-20-8	2	223135	365198	129356	41680	20487.6	23451.9	24768.8	66253.5	55256.5	172470	240036	469089	315297	285135	355655	380792	366500	387373	-	-
Zmyn005384	299.26	253.26	300.266	C18H36O3	[M-H]-	2R-Hydroxyoctadecanoic Acid*	Lipids	Free fatty acids	26633-48-7	1	122327	93019.4	123894	63406.5	79568.2	70961.4	441646	97371	419881	271102	309976	214503	301814	340836	365316	1.31959e+06	1.34576e+06	1.39486e+06	C03042	-
pme0500	503.16	323.1	504.169	C18H32O16	[M-H]-	D-Melezitose	Others	Saccharides	597-12-6	3	2.32452e+06	1.52315e+06	1.43669e+06	792511	977505	1.36131e+06	199549	258849	164361	236562	203199	230671	247914	213205	230178	1.06474e+06	1.11919e+06	1.11811e+06	C08243	-
mws1292	565.16	409.09	564.148	C26H28O14	[M+H]+	Isoschaftoside	Flavonoids	Flavones	52012-29-0	2	5.35361e+06	6.11813e+06	3.96351e+06	305123	708430	1206765	1745640	1206765	1371580	5.93218e+06	3.00428e+06	6.1148e+06	6026590	3.60944e+06	7.38618e+06	3.46753e+06	3.41069e+06	3.27989e+06	-	-
MWSslk132	285.21	223.21	286.214	C16H30O4	[M-H]-	Hexadecanedioic acid	Lipids	Free fatty acids	505-54-4	1	1.56576e+06	1.61283e+06	1.34783e+06	1.34601e+06	1.5662e+06	1.56283e+06	2.15478e+06	2.48557e+06	1.95608e+06	4.18776e+06	4.11305e+06	3.71489e+06	5.79609e+06	5.8246e+06	4.41813e+06	3.46084e+06	3.38333e+06	3.5794e+06	C19615	ko00073,ko01100
pmp001253	625.25	488.17	624.247	C36H36N2O8	[M+H]+	Cannabisin F	Alkaloids	Phenolamine	163136-19-4	2	1.18078e+06	973258	1.52551e+06	1.80729e+06	2.95599e+06	8.69993e+06	8.26863e+06	6.69806e+06	4.38017e+06	5.46775e+06	5.74651e+06	8.6194e+06	4.20238e+06	1.55036e+06	7.39533e+06	3.69735e+06	3.736e+06	3.53944e+06	C17910	-
ZbWn002007	211.06	96.96	212.072	C7H16O5S	[M-H]-	4-hydroxyheptyl hydrogen sulfate	Others	Others	-	2	944208	947976	1.12051e+06	2.57235e+06	2.92645e+06	3.09647e+06	3.18864e+06	3.15393e+06	3.01052e+06	1.71372e+06	1.97776e+06	1.93609e+06	1.51041e+06	1.37815e+06	1.22185e+06	1.70899e+06	1.7503e+06	1.65351e+06	-	-
Lamn006527	287.05	125.02	288.063	C15H12O6	[M-H]-	Drimiopsin C	Flavonoids	Other Flavonoids	773850-90-1	1	522747	341634	614887	1.8233e+06	978728	570524	4.21424e+06	5.11021e+06	1.0751e+07	3.4249e+06	2.19054e+06	3.42953e+06	1.77684e+06	1.92425e+06	2.21162e+06	2.37859e+06	2.51815e+06	2.45633e+06	-	-
Zbqn004681	245.09	203.08	246.1	C13H14N2O3	[M-H]-	N-acetyl-tryptophan	Amino acids and derivatives	Amino acids and derivatives	-	1	6.73478e+07	8.07331e+07	6.49996e+07	969705	1.98812e+06	4.41395e+06	1.08606e+06	295265	1.20773e+06	1.19682e+06	1.83451e+06	1.69672e+06	885392	1.08154e+06	1.74285e+06	1.73797e+07	1.84032e+07	1.78372e+07	-	-
pmf0297	297.32	183.21	298.324	C20H42O	[M-H]-	1-Eicosanol	Lipids	Free fatty acids	629-96-9	3	985248	1.08112e+06	822876	1.05307e+06	1.27877e+06	856395	1.77653e+07	2.24607e+07	1.55056e+07	3.24599e+07	3.38095e+07	3.14677e+07	3.04696e+07	2.61201e+07	2.74965e+07	1.80601e+07	1.91296e+07	1.8604e+07	-	-
HJN110	455.36	455.36	456.36	C30H48O3	[M-H]-	3-Hydroxylup-20(29)-en-28-oic acid (Betulinic acid)*	Terpenoids	Triterpene	472-15-1	2	134213	79675.8	551292	377489	351840	616920	477280	576645	298170	315093	404249	337958	220098	159560	228598	384642	395577	373436	C08619	-
mws0344	165.04	75.01	166.048	C5H10O6	[M-H]-	D-Xylonic acid	Others	Saccharides	526-91-0	1	4.63905e+07	3.51268e+07	2.84399e+07	2.24638e+07	3.01167e+07	1.96241e+07	4.65312e+06	6.58758e+06	4.19866e+06	7.14591e+06	6.77641e+06	7.09831e+06	8.85668e+06	8.94943e+06	1.07426e+07	1.38172e+07	1.36411e+07	1.44097e+07	C00502	ko00040,ko01100
Lmmn009170	455.35	455.35	456.36	C30H48O3	[M-H]-	3-Hydroxy-9,19-cyclolanost-24-en-26-oic acid (Mangiferolic acid)	Terpenoids	Triterpene	4184-34-3	3	280184	272043	126569	54636.1	96525	1.09007e+06	66903.5	53256	59567.7	198634	215557	303843	443807	271872	273023	261808	259998	248172	-	-
pmb3023	449.11	287.06	450.116	C21H22O11	[M-H]-	Eriodictyol-8-C-glucoside	Flavonoids	Flavanones	1023271-51-3	3	1.29951e+06	1.63918e+06	1.07404e+06	9	9	9	15119.4	30081.7	25966.6	143178	209909	265791	171513	133032	211499	636277	641535	671189	-	-
Wbmn006856	313.07	253.05	314.079	C17H14O6	[M-H]-	Coeloginin	Terpenoids	Triterpene Saponin	82358-34-7	3	1.01003e+06	655669	1.6602e+06	3.55788e+06	2.28896e+06	2.38203e+06	4.70152e+06	1.20366e+06	1.36278e+06	983246	375071	1.22995e+06	698208	792301	263113	1.237e+06	1.20034e+06	1.27218e+06	-	-
mws0289	480.31	339.29	479.301	C23H46NO7P	[M+H]+	LysoPE 18:1*	Lipids	LPE	89576-29-4	3	4.09819e+06	6.53081e+06	3.0633e+06	3.32355e+06	9.1294e+06	4.1139e+06	530766	204541	539348	349065	286463	379172	115663	262153	243618	2.96613e+06	3.0795e+06	2.90906e+06	-	-
Qmxp101522	303.23	119.09	302.225	C20H30O2	[M+H]+	Hinokiol(ISO2)	Terpenoids	Ditepenoids	-	2	215731	166514	308566	59208.5	29125.1	30642.7	285482	307478	324098	1.45963e+06	1.15966e+06	1.19981e+06	1.23492e+06	1.22039e+06	1.48414e+06	782120	798057	828128	-	-
mws0180	153.02	109.03	154.027	C7H6O4	[M-H]-	2,5-Dihydroxybenzoic acid; Gentisic Acid*	Phenolic acids	Phenolic acids	490-79-9	1	8.58951e+06	7.70915e+06	5.1288e+06	1.33812e+07	1.86793e+07	1.60794e+07	8.41597e+07	8.91808e+07	1.00919e+08	2.31517e+07	1.92543e+07	2.80595e+07	1.18722e+07	1.30121e+07	1.6771e+07	2.88646e+07	2.74448e+07	2.74682e+07	C00628	ko00350,ko01100
pmn001420	341.09	179.04	342.095	C15H18O9	[M-H]-	1-O-Caffeoyl-β-D-glucose*	Phenolic acids	Phenolic acids	14364-08-0	1	7.39062e+06	7.88292e+06	1.12445e+07	5.62335e+07	2.00362e+07	5.69764e+07	1.93987e+06	485891	359870	1.52664e+06	443333	847259	1.26318e+06	1.80327e+06	2.28095e+06	1.07359e+07	1.07991e+07	1.13174e+07	C10433	-
Lmbn003524	171.1	99.08	172.11	C9H16O3	[M-H]-	9-Oxononanoic acid	Organic acids	Organic acids	2553-17-5	3	360937	389144	158677	89409.2	154785	123488	41573.8	115190	42649.2	37848.1	42158.6	41925.2	46866.6	39720.8	25808.5	125198	121352	118104	C16322	ko00592,ko01110
pme3017	104.07	58.07	103.063	C4H9NO2	[M+H]+	2-Aminoisobutyric acid	Organic acids	Organic acids	62-57-7	3	7.4351e+06	8.33364e+06	1.25868e+07	2.9449e+07	1.89123e+07	1.68785e+07	1.43764e+07	1.23369e+07	1.30136e+07	1.14834e+07	1.19475e+07	1.12817e+07	1.05766e+07	1.06928e+07	1.13678e+07	1.3469e+07	1.27416e+07	1.33251e+07	C03665	-
pme2914	161.05	99.05	162.053	C6H10O5	[M-H]-	3-Hydroxy-3-methylpentane-1,5-dioic acid	Amino acids and derivatives	Amino acids and derivatives	503-49-1	1	6.81279e+06	6.48878e+06	5.89037e+06	9.61375e+06	1.04732e+07	8.84801e+06	5.06562e+07	1.27399e+07	2.7997e+07	2.82386e+07	6.01604e+07	6.28707e+07	3.27038e+07	3.12106e+07	7.38215e+07	5.64882e+07	5.35518e+07	5.39215e+07	C03761	-
Lmmn006706	391.17	309.17	392.183	C21H28O7	[M-H]-	9α-Ethoxy-8β-(2-isobutyryloxy)-14-oxo-acanthospermolide	Terpenoids	Sesquiterpenoids	-	2	856144	857369	183017	114221	111874	314718	988280	1.16072e+06	1.26603e+06	1.56223e+06	1.68535e+06	1.43538e+06	1.997e+06	2.15273e+06	2.01709e+06	1.24876e+06	1.30574e+06	1.32051e+06	-	-
Hmsn003721	531.33	531.33	532.34	C31H48O7	[M-H]-	2,3,23-Trihydroxyolean-12-ene-28,29-dioic acid 29-methyl ester (Phytolaccagenin)	Terpenoids	Triterpene	1802-12-6	2	927956	2.1523e+06	247755	424554	424986	1.47261e+06	1.25558e+06	2.90001e+06	1.3639e+06	910143	985600	921664	1.10078e+06	1.01716e+06	1.06574e+06	1.06269e+06	1.00789e+06	1.05895e+06	-	-
Lmhn005110	299.06	284.02	300.063	C16H12O6	[M-H]-	Aracarpene 1	Flavonoids	Isoflavones	1261245-78-6	2	1.52576e+06	1.49325e+06	1.47013e+06	417977	462877	593632	616966	659754	602882	9.25862e+06	8.59751e+06	9.1092e+06	1.3186e+07	1.08418e+07	1.08867e+07	8.02156e+06	7.65114e+06	7.60571e+06	-	-
Zahn007990	197.12	153.13	198.126	C11H18O3	[M-H]-	5-hydroxy-3,4-dimeth-yl-5-pentylfuran-2(5H)-one	Others	Others	-	1	294647	218922	391649	286941	341368	425311	620801	545172	621189	1.22436e+06	1.1753e+06	1.20668e+06	1.44495e+06	1.28975e+06	1.20978e+06	807169	781117	828453	-	-
mws0102	160.04	116.05	161.048	C9H7NO2	[M-H]-	Indole-5-carboxylic acid*	Alkaloids	Plumerane	1670-81-1	1	3.37121e+06	4.8228e+06	1.68451e+06	9.57232e+06	1.95629e+07	1.26612e+07	1.39055e+07	1.35796e+07	1.30778e+07	7.42361e+06	8.23446e+06	7.73844e+06	1.05144e+07	1.019e+07	9.1012e+06	6.93848e+06	7.09801e+06	7.3549e+06	-	-
Lmyn004515	207.06	177.02	208.074	C11H12O4	[M-H]-	3,4-Dimethoxycinnamic acid	Phenolic acids	Phenolic acids	2316-26-9	2	703628	232140	625311	1.22117e+07	3.36549e+06	6.71997e+06	1.21858e+07	3.63703e+06	1.32026e+07	4.0279e+06	3.00295e+06	4.73051e+06	1.5695e+06	1.79583e+06	2.89916e+06	2.74644e+06	2.68036e+06	2.58917e+06	-	-
HJAP140	299.08	284.07	298.084	C17H14O5	[M+H]+	Puerol A	Phenolic acids	Phenolic acids	152784-32-2	1	2.11715e+07	2.18563e+07	1.58055e+07	75102.3	74020.5	136387	146728	203835	192203	2.7518e+07	3.5883e+07	2.79164e+07	5.05084e+07	3.97964e+07	4.92295e+07	2.3527e+07	2.44755e+07	2.4941e+07	-	-
Xmmn006031	447.22	315.18	448.231	C21H36O10	[M-H]-	Borneol 7-O-[β-D-apiofuranosyl-(1→6)]-β-D-glucopyranoside	Terpenoids	Monoterpenoids	88700-35-0	2	754397	1.03342e+06	1.0875e+06	62029.5	37548.2	63342.2	16857	45622.5	18326.3	23369.5	15706.8	31413.7	19268.8	17239.6	17606.9	304118	293485	286785	-	-
pmp000106	313.11	298.08	312.1	C18H16O5	[M+H]+	5,7,4'-Trimethoxyflavone	Flavonoids	Flavones	5631-70-9	2	3.23546e+06	3.14509e+06	1.33788e+06	27078.7	50434.6	48739.9	167685	164552	141139	1.88271e+06	2.70824e+06	1.7745e+06	3.72881e+06	4.32818e+06	6.23763e+06	2.52996e+06	2.47651e+06	2.62548e+06	-	-
ZbLn005207	341.09	96.96	342.099	C12H22O9S	[M-H]-	Sulfatricalysine C	Others	Saccharides	-	1	1.87949e+07	2.60471e+07	1.83132e+07	267145	276684	393626	243773	383601	348781	1.64842e+07	1.49305e+07	1.6111e+07	1.69105e+07	1.24964e+07	1.65651e+07	1.36004e+07	1.28187e+07	1.31626e+07	-	-
mws1033	303.09	153.02	302.079	C16H14O6	[M+H]+	Homoeriodictyol	Flavonoids	Flavanones	446-71-9	3	403601	369561	781708	453067	335423	416335	1.36341e+06	1.40665e+06	1.72934e+06	846975	727594	819060	959258	655426	752460	732357	764884	723000	C09756	ko00941
pme2746	784.15	437.09	785.157	C27H33N9O15P2	[M-H]-	Riboflavin 5'-Adenosine Diphosphate	Nucleotides and derivatives	Nucleotides and derivatives	146-14-5	3	1.53725e+06	1.48214e+06	1.9189e+06	440737	597691	490206	194555	485473	209219	285109	318195	295045	394023	325176	373474	503149	515591	533758	C00016	ko00740,ko01100,ko01110,ko01240
Zmhp004269	375.11	360.08	374.1	C19H18O8	[M+H]+	Skullcapflavone II	Flavonoids	Flavones	55084-08-7	1	13126.1	19325.5	418318	2.03782e+07	2.21379e+07	2.57802e+07	2.34167e+07	2.84416e+07	2.15049e+07	9.01796e+06	1.00306e+07	9.08331e+06	6.68065e+06	6.7626e+06	4.55437e+06	9.90098e+06	9.42124e+06	9.39491e+06	C10183	-
MWSmce116	252.1	136.06	251.102	C10H13N5O3	[M+H]+	5'-Deoxyadenosine*	Nucleotides and derivatives	Nucleotides and derivatives	4754-39-6	2	3.2133e+06	3.64404e+06	2.70386e+06	992354	2.34572e+06	1.58067e+06	1.5242e+06	1.40377e+06	1.63038e+06	1.10407e+07	9.1422e+06	9.83557e+06	6.63054e+06	4.16826e+06	6.90495e+06	5.1688e+06	5.24255e+06	4.94952e+06	C05198	-
Wcdp009119	279.23	81.07	278.225	C18H30O2	[M+H]+	Elaidolinolenic acid	Phenolic acids	Phenolic acids	28290-79-1	1	271495	271280	172698	84607.4	60099.7	204892	1.0866e+07	3.58172e+06	9888306	2.07738e+07	1.94765e+07	1.90576e+07	1.90946e+07	1.57213e+07	1.78149e+07	1.13019e+07	1.1331e+07	1.0743e+07	-	-
Lmxn008846	197.12	153.13	198.126	C11H18O3	[M-H]-	Hydroxydihydrobovolide	Others	Lactones	6067-11-4	3	288508	222759	366599	281222	326589	393942	582244	497059	572551	1.15805e+06	1.17045e+06	1.13976e+06	1.30959e+06	1.14554e+06	1.10915e+06	785031	772320	740709	-	-
Lmtp004044	597.14	303.04	596.138	C26H28O16	[M+H]+	Quercetin-3-O-apiosyl(1→2)galactoside*	Flavonoids	Flavonols	-	1	140075	36982	1.07374e+06	40203	3.40359e+06	7820790	447480	141740	1077400	1.27741e+06	593958	977332	1769260	167929	80417.7	993460	975000	1.0335e+06	-	-
MWSHY0018	403.14	373.1	402.132	C21H22O8	[M+H]+	Nobiletin (5,6,7,8,3',4'-Hexamethoxyflavone)	Flavonoids	Flavones	478-01-3	3	1.00188e+07	8.80994e+06	9.08251e+06	8.93945e+06	9.15937e+06	9.30966e+06	8.5077e+06	8.86512e+06	9.5698e+06	9.5285e+06	9.19105e+06	8.72174e+06	9.22759e+06	9.37939e+06	9.12447e+06	8.60639e+06	9.13306e+06	8.81534e+06	C10112	-
MWS0813	128.036	82.0295	129.043	C5H7NO3	[M-H]-	5-Oxoproline*	Amino acids and derivatives	Amino acids and derivatives	149-87-1	3	61162.4	45147.4	18802.3	29749.1	143866	38720.6	39129.7	61142.7	51903.8	75351.6	101531	75722.8	132118	98607.4	116832	96085.2	100703	101715	C02237	ko00470,ko01100
mws0566	123.05	108.02	124.052	C7H8O2	[M-H]-	4-Methylcatechol	Phenolic acids	Phenolic acids	452-86-8	3	5373.58	9566.57	12018.8	9	9	9	13340	25876.1	47040.5	216076	197580	194247	251004	196474	239734	117030	121880	124218	C06730	ko01100
mws0470	117.019	73.0295	118.027	C4H6O4	[M-H]-	Methylmalonic acid*	Organic acids	Organic acids	516-05-2	1	4.82313e+06	5.10037e+06	6.81191e+06	4.05725e+06	3.86381e+06	3.22509e+06	2.33751e+07	2.6884e+07	2.40044e+07	2.84674e+07	2.86628e+07	2.7458e+07	3.01434e+07	2.97381e+07	2.67415e+07	2.21253e+07	2.14208e+07	2.08222e+07	C02170	ko00240,ko00280,ko00640,ko01100
Lmyn007622	331.25	157.12	332.256	C18H36O5	[M-H]-	9,10,18-Trihydroxystearic acid	Lipids	Free fatty acids	496-86-6	3	12564.8	6672.48	5079.11	4499.25	16978	10236.2	1.12902e+06	624960	1.17246e+06	920515	1.00339e+06	799016	1.00867e+06	986044	972997	531938	557729	563398	C19621	ko00073
Zmdn008530	509.13	254.06	510.132	C30H22O8	[M-H]-	Emodin bianthrone*	Quinones	Anthraquinone	-	1	321591	1.78922e+06	2.41037e+06	9	9	9	2170.48	83487.5	2372.5	3.47635e+06	3.12059e+06	2.19992e+06	1.72803e+06	658285	787194	1.06763e+06	1.02432e+06	1.08753e+06	-	-
Walp006011	246.24	88.08	245.236	C14H31NO2	[M+H]+	2-Aminotetradecane-1,4-diol	Lipids	Sphingolipids	-	2	1.57683e+06	1.43639e+06	1.50118e+06	1.31808e+06	1.22863e+06	1.4235e+06	1.38754e+06	1.42509e+06	1.37634e+06	1.27893e+06	1.2783e+06	1.43653e+06	296277	1.30514e+06	1.57594e+06	2.03484e+06	1.92781e+06	2.03206e+06	-	-
Lmmn004912	315.05	271.02	316.058	C16H12O7	[M-H]-	3-O-Methylquercetin	Flavonoids	Flavonols	1486-70-0	2	83244.8	202478	123990	69651.4	64902.4	70905.4	193066	171514	179562	405159	402190	409046	474955	392999	387404	278578	284615	295807	C04443	ko00944,ko01110
Lmyn007883	287.22	287.22	288.23	C16H32O4	[M-H]-	9,16-Dihydroxypalmitic acid	Lipids	Free fatty acids	38076-49-2	2	4.04568e+06	5.23833e+06	4.9545e+06	2.69196e+06	3.24363e+06	4.24129e+06	9.95631e+06	6.81656e+06	8.89911e+06	1.37504e+07	1.23188e+07	1.05549e+07	1.52942e+07	1.85713e+07	1.37626e+07	1.10146e+07	1.07003e+07	1.13734e+07	-	-
Latp009855	235.17	179.11	234.161	C15H22O2	[M+H]+	Ligudicin D	Terpenoids	Sesquiterpenoids	-	3	2.93918e+06	2.74338e+06	2.78223e+06	3.4152e+06	3.38998e+06	3.46067e+06	3.1164e+06	2.69219e+06	3.15008e+06	2.79766e+06	2.75719e+06	3.02255e+06	2.71548e+06	2.68343e+06	2.9676e+06	2.72374e+06	2.60831e+06	2.56867e+06	-	-
pme1474	298.1	136.06	297.09	C11H15N5O3S	[M+H]+	5'-Deoxy-5'-(methylthio)adenosine	Nucleotides and derivatives	Nucleotides and derivatives	2457-80-9	1	6.65178e+07	9.60083e+07	3.63176e+07	1.92861e+07	3.87786e+07	1.76609e+07	1.41736e+06	6.43003e+06	1.63668e+06	1.98808e+06	2.40841e+06	2.2669e+06	4.1133e+06	3.22016e+06	3.10495e+06	1.66351e+07	1.72933e+07	1.76755e+07	C00170	ko00270,ko00908,ko01100
MWSslk117	163.04	69	162.032	C9H6O3	[M+H]+	7-Hydroxy-4-chromone	Others	Chromone	59887-89-7	1	1.32614e+06	1.52979e+06	864077	165287	92459.2	188465	98087.9	120300	153231	1.08171e+06	1.40471e+06	1.40393e+06	3.04317e+06	2.2924e+06	2.44333e+06	1.64123e+06	1.55214e+06	1.56304e+06	-	-
pmn001716	447.09	285.04	448.101	C21H20O11	[M-H]-	Carthamone	Flavonoids	Chalcones	86579-00-2	3	2.8452e+06	1.46604e+07	4.66674e+06	1.11244e+06	810640	648557	44145.8	37351.9	49724.2	126618	119048	93677.6	44725.8	41240.1	33087.7	2.49698e+06	2.56975e+06	2.41677e+06	C08598	-
HJN098	779.46	779.46	780.466	C42H68O13	[M-H]-	Azukisaponin I	Terpenoids	Triterpene Saponin	82793-02-0	2	7.15829e+06	5.01245e+06	6.38333e+06	376465	683464	1.32039e+06	786524	657454	593308	7.81303e+06	8.83038e+06	6.30982e+06	1.03331e+07	1.11597e+07	8.06239e+06	6.60852e+06	6.69661e+06	6.31307e+06	-	-
mws0576	103.04	59.01	104.047	C4H8O3	[M-H]-	3-Hydroxybutyric acid	Organic acids	Organic acids	300-85-6	2	5.98455e+06	7.22884e+06	4.92062e+06	1.02641e+06	9.80871e+06	1.31015e+06	2.15423e+06	3.44227e+06	2.42068e+06	2.58089e+06	2.52461e+06	2.82507e+06	2.8071e+06	2.50623e+06	3.0773e+06	4.2292e+06	4.02841e+06	3.99738e+06	C01089	ko00650,ko01100
MWSslk208	301.22	301.22	302.225	C20H30O2	[M-H]-	Kaurenoic Acid*	Terpenoids	Ditepenoids	6730-83-2	2	68910.5	17433.5	152115	5.17405e+07	4.81502e+07	4.7619e+07	4.79226e+07	6.03342e+07	5.4809e+07	1.81742e+07	2.1664e+07	1.99061e+07	9.22313e+06	2.49267e+07	1.60452e+07	2.71571e+07	2.79022e+07	2.6235e+07	C11874	ko00904,ko01100,ko01110
Zmpn000199	209.03	85.03	210.038	C6H10O8	[M-H]-	D-Galactaric acid	Others	Saccharides	526-99-8	3	1.14232e+07	8.63188e+06	1.54537e+07	2.92588e+07	2.77478e+07	2.6124e+07	4.48358e+06	2.2598e+06	3.74961e+06	2.57446e+06	2.05183e+06	2.73531e+06	1.87094e+06	1.73504e+06	2.77071e+06	5.22607e+06	5.53766e+06	5.48769e+06	C00879	ko00053,ko01100
Hmcp003285	249.15	185.13	248.141	C15H20O3	[M+H]+	Santamarin*	Terpenoids	Sesquiterpenoids	4290-13-5	3	111715	61400.1	29036.2	301478	206800	322392	302377	726618	347951	124580	102064	166029	176039	143294	128716	180140	186421	175270	C09544	-
Lmzn006024	483.31	483.31	484.319	C30H44O5	[M-H]-	2-Aldehydo-A(1)-norlup-20(29)-en-27,28-dioic acid (Zizyberanal acid)	Terpenoids	Triterpene	1167421-91-1	2	4.48753e+06	6.9418e+06	3.55297e+06	9	2.54324e+06	2.42716e+06	1.867e+06	1.09855e+06	2.02522e+06	4.84995e+06	3.84135e+06	3.07724e+06	1.67072e+07	3.97077e+06	4.33847e+06	3.3521e+06	3.46935e+06	3.26176e+06	-	-
Lmhp001461	229.15	70.07	228.147	C11H20N2O3	[M+H]+	L-Prolyl-L-Leucine	Amino acids and derivatives	Amino acids and derivatives	52899-07-7	2	1.82078e+07	1.35359e+07	4.31801e+07	757182	9.6994e+06	771114	9.81792e+07	2.78142e+07	8.52029e+07	2.71726e+08	2.55126e+08	262443438	2.34988e+08	2.06104e+08	2.2574e+08	1.61132e+08	1.52973e+08	1.6182e+08	-	-
mws0232	377.15	243.09	376.138	C17H20N4O6	[M+H]+	Riboflavin (Vitamin B2)	Others	Vitamin	83-88-5	1	461388	449115	407720	108478	528161	134150	134598	117332	167103	367783	405809	424130	554310	501919	531744	375045	389390	399051	C00255	ko00740,ko01100,ko01110,ko01240,ko02010
pme2598	167.03	123.05	168.042	C8H8O4	[M-H]-	3,4-Dihydroxybenzeneacetic acid	Phenolic acids	Phenolic acids	102-32-9	3	584845	423553	233980	585096	535716	630930	2.05286e+07	1.21716e+07	2.02502e+07	8.37123e+06	9.07604e+06	8.79569e+06	5.31325e+06	5.60715e+06	5.20425e+06	5.79981e+06	5.48917e+06	5.50721e+06	C01161	ko00350,ko01100
Jmwn002117	331.1	153.02	332.111	C14H20O9	[M-H]-	2-(3,4-dihydroxyphenyl)ethanediol 1-O-β-D-glucopyranoside*	Phenolic acids	Phenolic acids	-	1	4.84884e+06	4.35373e+06	4.61246e+06	3.16989e+07	6.93216e+06	2.01378e+07	246115	140245	127130	60143.5	90212.5	106398	33820.1	99518.4	77084.4	3.0479e+06	3.13235e+06	2.94325e+06	-	-
pme3351	144.07	126.06	145.074	C6H11NO3	[M-H]-	Allysine(6-Oxo DL-Norleucine)	Amino acids and derivatives	Amino acids and derivatives	1962-83-0	3	293145	315600	248961	2.93726e+06	5.52939e+06	3.08144e+06	638710	553224	580666	238332	251317	296950	278340	218488	212189	571997	599193	565079	C04076	ko00300,ko00310,ko00960,ko01100,ko01110,ko01230
pmn001681	165.09	149.06	166.099	C10H14O2	[M-H]-	1-(4-Methoxyphenyl)-1-propanol	Phenolic acids	Phenolic acids	5349-60-0	3	4.9597e+06	5.25826e+06	1.76158e+06	2.24863e+06	2.21604e+06	3.9565e+06	4.585e+06	3.34647e+06	5.02621e+06	2.92968e+06	2.94797e+06	3.44694e+06	2.69152e+06	2.61177e+06	2.74799e+06	2.47705e+06	2.35388e+06	2.34267e+06	-	-
pme2165	155.01	111.02	156.017	C5H4N2O4	[M-H]-	Orotic acid (Vitamin B13)	Others	Vitamin	65-86-1	3	867957	971354	730497	1.80587e+06	1.85013e+06	1.54658e+06	1.57763e+06	619957	1.83384e+06	1.47165e+06	1.56851e+06	1.73134e+06	1.53871e+06	1.98403e+06	1.50803e+06	1.32997e+06	1.32249e+06	1.25598e+06	C00295	ko00240,ko01100,ko01240
Lmxn007456	359.08	329.03	360.084	C18H16O8	[M-H]-	Acerosin	Flavonoids	Flavones	15835-74-2	1	46214.8	62271.5	50920.3	1.55682e+07	1.30675e+07	1.75536e+07	1.43286e+07	1.62889e+07	1.33987e+07	2.9554e+06	3.53617e+06	3.35292e+06	1.89917e+06	2.21967e+06	1.96757e+06	4.10894e+06	3.96729e+06	3.85979e+06	C09982	-
Zmjp010694	359.11	344.09	358.105	C19H18O7	[M+H]+	5-Hydroxy-3,7,3',4'-tetramethoxyflavone (Retusin)*	Flavonoids	Flavones	1245-15-4	2	19266.4	47756.6	22218.5	8.50772e+06	8.81921e+06	9.88242e+06	1.01261e+07	1.24342e+07	8.73823e+06	4.14178e+06	4.3944e+06	3.60829e+06	2.87948e+06	3.22148e+06	1.90111e+06	3.77519e+06	3.81392e+06	4.00221e+06	-	-
MWSslk133	257.18	195.18	258.183	C14H26O4	[M-H]-	1,14-Tetradecanedioic Acid	Lipids	Free fatty acids	821-38-5	2	687115	675924	620033	899823	1.00442e+06	1.05822e+06	1.12691e+06	1.32772e+06	1.05361e+06	690821	771174	787095	622679	657089	666141	734618	751059	781559	-	-
Zmgn005057	297.24	183.01	298.251	C18H34O3	[M-H]-	9,10-Epoxyoctadecanoic Acid	Lipids	Free fatty acids	2443-39-2	3	6.69417e+06	6.64433e+06	6.8081e+06	6.06387e+06	5.8667e+06	5.79261e+06	5.42176e+06	5.49453e+06	5.48248e+06	5.64305e+06	5.47394e+06	5.84522e+06	6.07615e+06	6.00091e+06	5.70372e+06	5.93981e+06	5.6562e+06	5.60285e+06	C19418	ko00073
Wcdn003654	281.06	178.03	282.074	C13H14O7	[M-H]-	Feruloyl Lactate	Organic acids	Organic acids	-	1	3.29424e+06	4.20283e+06	1.06744e+06	188825	325885	314917	572936	725100	655827	2.86633e+06	3.38547e+06	6903440	7.09484e+06	6.31111e+06	6.482e+06	3.65725e+06	3.51866e+06	3.43582e+06	-	-
Hmgn002833	371.11	297.11	372.121	C20H20O7	[M-H]-	4-Ketopinoresinol	Lignans and Coumarins	Lignans	66288-89-9	2	539557	249053	181324	113532	161892	198706	499888	489529	394887	992652	425154	513728	326131	462917	297382	324321	342321	343252	-	-
pmb3081	289	96.97	290.004	C6H11PO11	[M-H]-	Glucaric acid-1-Phosphate	Others	Saccharides	-	3	381463	210391	169597	192188	174484	185330	85464.6	44733.6	51518.5	140881	119559	214254	118089	137070	112222	137348	143031	146251	-	-
pme0266	201.11	139.11	202.12	C10H18O4	[M-H]-	Sebacic acid	Organic acids	Organic acids	111-20-6	1	63709.5	75913	43431	27122.2	36203.4	42016.9	136014	271731	128424	241283	436657	224701	335601	328894	290794	219641	215343	206359	C08277	-
Zmdn005541	431.1	269.05	432.106	C21H20O10	[M-H]-	Emodin-6-O-glucoside	Quinones	Anthraquinone	-	1	3.54465e+06	6.47923e+06	2.70627e+07	75358.6	73267.9	54549.8	11320.9	13442.9	24952.4	609626	485653	573894	234747	118922	96879.3	3.03812e+06	3.18297e+06	3.23005e+06	-	-
mws0366	277.22	277.22	278.225	C18H30O2	[M-H]-	γ-Linolenic Acid*	Lipids	Free fatty acids	506-26-3	1	999645	1.03599e+06	797058	291856	460089	364285	681608	657787	657164	1.19848e+06	1.25606e+06	1.15388e+06	1.38099e+06	1.17293e+06	1.15299e+06	1.06476e+06	1.01639e+06	1.00256e+06	C06426	ko00591,ko01040,ko01100
Lmyn006227	269.05	151	270.053	C15H10O5	[M-H]-	Galangin (3,5,7-Trihydroxyflavone)	Flavonoids	Flavones	548-83-4	3	857972	733990	930413	32823.9	25900.1	37897.4	49636.8	54371.8	45696.9	2.10617e+06	2.10158e+06	2.02883e+06	2.53651e+06	2.27314e+06	2.25885e+06	1.73859e+06	1.84204e+06	1.83361e+06	C10044	ko00941
Lmdn006811	455.35	455.35	456.36	C30H48O3	[M-H]-	3,24-Dihydroxyolean-12-en-22-one (Soyasapogenol E)*	Terpenoids	Triterpene	6750-59-0	2	134651	170307	231076	344691	419833	745391	297447	298845	447285	267200	209237	208862	216815	186421	119325	349948	368430	347850	C17420	-
Hmmp007513	375.11	345.06	374.1	C19H18O8	[M+H]+	5,7-Dihydroxy-6,3',4',5'-tetramethoxyflavone (Arteanoflavone)*	Flavonoids	Flavones	68710-17-8	1	63991	64991.4	1.30815e+06	4.59124e+07	4.74502e+07	6.01725e+07	5.31799e+07	6.40556e+07	4.65261e+07	2.18678e+07	2.29939e+07	2.06608e+07	1.5449e+07	1.50917e+07	1.13085e+07	2.16355e+07	2.15386e+07	2.27981e+07	-	-
mws0341	131.07	85.07	132.079	C6H12O3	[M-H]-	2-Hydroxyisocaproic acid	Organic acids	Organic acids	20312-37-2	1	392755	706907	162012	482355	3.52016e+06	540489	7.13209e+06	7525485	7.40925e+06	8.91978e+06	9.4889e+06	5065200	8.37852e+06	4984080	7.35954e+06	5.72337e+06	5.94767e+06	6.09882e+06	C03264	-
Zbfn008704	369.26	279.23	370.272	C21H38O5	[M-H]-	2,3,3-trihydroxypropyl octadeca-9,12-dienoate	Lipids	Free fatty acids	-	2	965.873	4658.69	2083	1010.16	1071.63	2468.13	123928	2405.21	115881	143986	165309	149783	133723	118643	128069	68371.8	72737.5	71577.8	-	-
Zahp012577	280.26	81.07	279.256	C18H33NO	[M+H]+	Octadecadienamide	Alkaloids	Alkaloids	-	2	123541	118812	86082.3	89748.3	191028	107788	138784	147535	140870	194941	242160	254305	323417	270955	293623	829843	884631	859154	-	-
Lmbn001609	145.05	83.05	146.058	C6H10O4	[M-H]-	2-Acetyl-2-Hydroxybutanoic Acid	Organic acids	Organic acids	-	3	306110	370635	242736	182974	138518	150083	372561	393056	356712	526537	564583	498793	677572	638364	603319	406318	432311	414010	C06006	ko00290,ko01100,ko01110,ko01210,ko01230
Lakn003294	343.1	181.05	344.111	C15H20O9	[M-H]-	2-β-D-Glucopyranosyloxy-5-hydroxyphenylacetic acidmethylester	Phenolic acids	Phenolic acids	-	1	990574	802290	1.91786e+06	9.79596e+06	7.44022e+06	8.34052e+06	123390	55936.8	138367	108677	34564.3	108670	47764	63960.5	108090	1.89723e+06	1.78567e+06	1.87612e+06	-	-
Lmtn004049	263.13	204.12	264.136	C15H20O4	[M-H]-	Abscisic acid	Organic acids	Organic acids	21293-29-8	2	1.91342e+06	1.80526e+06	2.04396e+06	342509	627552	336244	381723	462718	429989	1.80626e+06	1.71198e+06	1.60071e+06	1.88535e+06	1.89803e+06	1.91058e+06	1.59691e+06	1.52197e+06	1.50381e+06	C06082	ko00906,ko01100,ko01110,ko04075
Wayn002279	219.05	111.01	220.058	C8H12O7	[M-H]-	Dihomocitric acid	Organic acids	Organic acids	-	3	51788.4	40745.8	14724.2	38582.8	26675	25973.9	235563	119639	218817	259962	265139	263319	108567	139612	158652	156545	147093	149954	-	-
MWS201479	239.1	136.08	238.095	C11H14N2O4	[M+H]+	Tyr-Gly	Amino acids and derivatives	Amino acids and derivatives	673-08-5	3	5.19747e+06	2.44418e+06	1.12715e+07	351891	2.13851e+06	474626	2.74904e+06	3.92064e+06	2.12787e+06	2.67701e+06	2.89469e+06	3.88786e+06	2.38108e+06	1.32638e+06	2.16898e+06	3.19599e+06	3.04592e+06	3.00946e+06	-	-
mws0038	313.07	283.02	314.079	C17H14O6	[M-H]-	5,4'-Dihydroxy-3,7-dimethoxyflavone(Kumatakenin)	Flavonoids	Flavonols	3301-49-3	1	204605	254809	240025	70607.4	79624	93612.5	91499.4	69975.2	52282.7	498143	485633	453079	584054	509438	471206	348341	340877	363007	-	-
mws0791	593.19	285.08	594.195	C28H34O14	[M-H]-	Poncirin (Isosakuranetin-7-O-neohesperidoside)*	Flavonoids	Flavanones	14941-08-3	3	4.07799e+06	1.30735e+06	6.92914e+06	544918	744562	955289	484579	589060	243196	3.37105e+06	7.88487e+06	2.45443e+06	617350	5.91691e+06	899121	2.20268e+06	2.34872e+06	2.28542e+06	C09830	-
mws1094	287.06	259.07	288.063	C15H12O6	[M-H]-	Aromadendrin (Dihydrokaempferol)	Flavonoids	Flavanonols	480-20-6	1	203123	145273	221109	663576	375491	206399	1.55389e+06	2.02061e+06	4.19011e+06	1.26214e+06	767311	1.25316e+06	626377	651592	755995	889585	839310	885941	C00974	ko00941,ko01100,ko01110
MWS20151	271.06	153.02	270.053	C15H10O5	[M+H]+	Apigenin; 4',5,7-Trihydroxyflavone	Flavonoids	Flavones	520-36-5	1	335703	357207	387592	16294.9	25456	22365.9	15020.6	23161.5	22723.1	788898	931974	884327	1.06185e+06	970597	1.07478e+06	793632	744238	774115	C01477	ko00941,ko00943,ko00944,ko01100,ko01110
Cmmn012461	299.2	299.2	300.209	C20H28O2	[M-H]-	Dehydroabietic acid	Terpenoids	Ditepenoids	1740-19-8	2	9	9	9	7549.97	11904.5	27049.6	383674	336884	347726	660183	745350	633010	714155	630554	663460	396144	422553	411071	C12078	-
Lmcn002982	197.05	167	198.053	C9H10O5	[M-H]-	Methyl 3-O-Methyl Gallate	Phenolic acids	Phenolic acids	3934-86-9	3	90158	105407	36491.9	53791.4	84310.8	118330	150935	147957	134815	115682	156968	126008	160072	145909	171296	120601	127652	120933	-	-
Lmhp008833	494.32	184.07	493.317	C24H48NO7P	[M+H]+	LysoPC 16:1(2n isomer)*	Lipids	LPC	-	2	5.93441e+06	6.174e+06	2.15522e+06	2.02507e+06	4.02075e+06	3.24376e+06	27283	8.0119e+06	51266.1	300745	45715.2	133516	70279.3	32351.9	1.04252e+06	1.5988e+06	1.6735e+06	1.70317e+06	-	-
Wbtn006721	285.04	133.03	286.048	C15H10O6	[M-H]-	6,8-dihydroxy-3-methyl-9-oxoxanthene-1-carboxylic acid	Others	Ketone compounds	-	1	387301	334683	712195	22806.8	19118.8	18397.4	74788.8	35453.8	56871.7	2.87419e+06	2.83838e+06	2.39247e+06	3.33966e+06	2.8663e+06	2.86395e+06	2.0197e+06	2.09268e+06	1.96159e+06	-	-
HX1341	163.04	89.04	162.032	C9H6O3	[M+H]+	7-hydroxy-2H-1-benzopyran-2-one	Lignans and Coumarins	Coumarins	-	2	1.73814e+06	747632	1.0139e+07	8.67425e+07	1.53006e+07	9.02772e+07	2.7124e+06	1.16148e+06	4.62058e+06	599559	507835	579838	231769	323131	4.03396e+07	1.58342e+07	1.50935e+07	1.48928e+07	-	-
mws0955	317.21	113.1	318.219	C20H30O3	[M-H]-	12-Oxo-5,8,10,14-eicosatetraenoic acid	Lipids	Free fatty acids	108437-64-5	3	43775.3	55190.3	45433.3	27279.1	76163.3	49579.5	116575	456604	123683	95512	241855	193699	252232	290483	219699	167720	166878	176865	C14807	ko00590
Zbqn003864	206.08	88.04	207.089	C11H13NO3	[M-H]-	(4-acetylphenyl)-L-alanine	Amino acids and derivatives	Amino acids and derivatives	-	2	1.84205e+06	2.38403e+06	2.07335e+06	517736	387569	402316	366379	346547	478877	742946	671860	599434	618755	667801	777960	925005	972144	915157	-	-
Zmyn004943	263.2	59.01	264.209	C17H28O2	[M-H]-	Norlinolenic acid	Lipids	Free fatty acids	-	3	350008	350464	305644	35939.4	65576.8	35964	85172.2	67758.6	91939.9	392847	443254	373918	686277	540370	546915	371663	392779	393980	C16344	ko00592
Lafp006517	373.17	137.06	372.157	C21H24O6	[M+H]+	Arctigenin	Lignans and Coumarins	Lignans	7770-78-7	2	21932.2	18340	21238.6	12985.4	85542.7	17714.5	1.72455e+06	658376	1.61966e+06	712459	552502	916966	312572	375694	369369	400392	426944	410322	C10545	-
Hmcn003273	247.13	203.14	248.141	C15H20O3	[M-H]-	Reynosin	Terpenoids	Sesquiterpenoids	28254-53-7	2	490924	494587	232917	2.07526e+06	1.39002e+07	3.16841e+06	8.38958e+06	1.72649e+07	1.82604e+07	1.28713e+06	3.051e+06	1.43545e+06	1.72914e+06	979150	540178	4.64489e+06	4.77279e+06	4.47241e+06	-	-
Lafp005959	237.18	135.12	236.177	C15H24O2	[M+H]+	7-Hydroxy-costol	Terpenoids	Sesquiterpenoids	-	3	401464	109151	102958	234911	228806	251411	342255	324603	355758	314732	577130	332762	432824	678417	226015	640267	632761	601868	-	-
Lmmn003323	271.23	225.22	272.235	C16H32O3	[M-H]-	2-Hydroxyhexadecanoic acid	Organic acids	Organic acids	764-67-0	1	193301	194078	177420	63295.8	62428.7	55677.4	447212	70414.8	388105	178550	184965	134924	226424	226779	268452	491174	509676	477699	-	-
Lmbn001364	131.03	87.05	132.042	C5H8O4	[M-H]-	4-Hydroxy-2-Oxopentanoic Acid*	Organic acids	Organic acids	3318-73-8	2	645378	503622	372424	506544	1.28365e+06	421356	964171	892562	960252	907648	1.16096e+06	1.099e+06	1.28139e+06	1.03423e+06	1.07765e+06	880232	922426	866886	C03589	ko00360,ko01100
MWS3166	312.26	74.03	313.262	C18H35NO3	[M-H]-	N-Palmitoylglycine	Amino acids and derivatives	Amino acids and derivatives	2441-41-0	2	131330	105293	87198.4	45104.7	202660	54566.8	186405	231763	175510	1.04111e+06	1.12658e+06	847285	2.50336e+06	1.75314e+06	1.62691e+06	839292	788868	800276	-	-
NK10256198	285.04	257.05	286.048	C15H10O6	[M-H]-	3,5,7,2'-Tetrahydroxyflavone; Datiscetin	Flavonoids	Flavones	480-15-9	2	3.06236e+06	7.06846e+06	5.57586e+06	14751.9	20977.6	12868.4	39525.5	440007	54211.2	5.76541e+06	5.06066e+06	4.65677e+06	3.60383e+06	2.25316e+06	1.97447e+06	2.70498e+06	2.54332e+06	2.57744e+06	C10036	-
pmp000906	213.13	195.12	212.12	C15H16O	[M+H]+	Dihydroylindesteolene	Others	Aldehyde compounds	-	3	87330.9	105093	198011	135922	253513	155216	307780	392058	335390	385664	414673	341382	381342	325455	346697	286038	297031	278343	-	-
MW0119612	162.06	119.05	163.063	C9H9NO2	[M-H]-	3-Hydroxy-3-methyloxindole	Alkaloids	Plumerane	3040-34-4	3	32927.6	26455.3	9327.11	7627.81	10283.6	20231.1	73390.1	103433	96578.4	86522.9	67081	56813	64093.1	43589.1	55466.7	47018.8	50149.7	49153.8	C05834	ko00380
Walp007043	274.27	88.08	273.267	C16H35NO2	[M+H]+	2-Aminohexadecane-1,4-diol	Lipids	Sphingolipids	-	2	1.25662e+07	1.33123e+07	1.49248e+07	1.4382e+07	1.14987e+07	1.39209e+07	1.20175e+07	1.33624e+07	1.18299e+07	1.09235e+07	1.16311e+07	1.15659e+07	2.27512e+07	1.1809e+07	1.23395e+07	2.15061e+07	2.2523e+07	2.11491e+07	-	-
Wcgn010096	315.19	141.13	316.204	C20H28O3	[M-H]-	2-ethenyl-7-hydroxy-2,4b,8,8-tetramethyl-4,4a,5,7,8a,9-hexahydro-1H-phenanthrene-3,6-dione	Terpenoids	Ditepenoids	-	3	171599	170238	190150	58229.8	235540	272367	587870	669086	442609	602708	706311	640742	565843	517874	645272	373949	396649	395399	-	-
pme0422	193.051	134.037	194.058	C10H10O4	[M-H]-	Isoferulic Acid*	Phenolic acids	Phenolic acids	25522-33-2	2	2.21604e+07	1.77961e+07	3.01872e+07	788187	4201080	1.34327e+06	4.33513e+06	1.54486e+07	4.60133e+06	1.25809e+07	1.00754e+07	2.63687e+07	5.49564e+06	5.38276e+06	1.81444e+07	1.76896e+07	1.7113e+07	1.82752e+07	C10470	-
Zmyn000108	209.03	85.03	210.038	C6H10O8	[M-H]-	D-Saccharic acid	Others	Saccharides	87-73-0	3	1.25981e+07	9.59251e+06	1.73743e+07	3.00331e+07	2.71133e+07	2.63718e+07	2.22066e+06	3.04201e+06	3.79699e+06	2.61742e+06	2.15418e+06	2.77501e+06	2.05437e+06	1.86057e+06	2.86516e+06	5.84868e+06	6.10572e+06	6.24105e+06	C00818	ko00053,ko01100
Lssp210188	377.16	163.08	376.152	C20H24O7	[M+H]+	(7'R)-7'-Hydroxylariciresinol	Others	Others	-	1	192245	150593	169943	762430	1.32557e+06	1.01668e+06	4.15048e+06	4.23806e+06	4.30586e+06	2.02969e+06	1.28778e+06	2.45481e+06	729451	762350	858064	1.19404e+06	1.23093e+06	1.27523e+06	-	-
Lmmn002164	131.035	87.0452	132.042	C5H8O4	[M-H]-	Monomethyl succinate*	Organic acids	Organic acids	3878-55-5	2	798390	800294	565947	480348	1.40564e+06	459193	937550	995317	1.00608e+06	1.21938e+06	1.31373e+06	1.22206e+06	1.46809e+06	1.43067e+06	1.14814e+06	1.00329e+06	1.04531e+06	979509	-	-
Hmtn001288	181.05	135.04	182.058	C9H10O4	[M-H]-	Methyl 2,4-dihydroxyphenylacetate	Phenolic acids	Phenolic acids	67828-42-6	1	276976	431281	133112	920235	2.57464e+06	998136	4.32119e+07	1.89521e+07	4.22469e+07	2.59028e+07	2.6429e+07	2.68922e+07	2.07775e+07	2.07259e+07	2.0861e+07	1.90746e+07	1.81992e+07	1.94095e+07	-	-
Zblp001009	272.11	110.06	271.106	C12H17NO6	[M+H]+	3-pyridine-methanol-O-β-D-glucopyranosyl	Alkaloids	Pyridine alkaloids	-	3	721575	775741	1.6996e+06	701523	545574	804986	75150	699478	49697.9	174193	187234	144700	337728	354841	327944	305336	325653	320000	-	-
Cmpp008728	243.1	187.11	242.094	C15H14O3	[M+H]+	Lettucenin B	Terpenoids	Sesquiterpenoids	1609479-06-2	3	176055	230451	111715	167175	137080	50405.8	52568.6	115164	159001	703140	530736	348477	1.02049e+06	829723	695050	437643	467621	453058	-	-
Laxp005049	303.05	229.05	302.043	C15H10O7	[M+H]+	Bracteatin	Flavonoids	Other Flavonoids	3260-50-2	2	1.89215e+06	782030	5.07919e+06	390883	4.05145e+06	4.44823e+06	491896	315966	567634	1.63528e+06	1.61524e+06	2.37523e+06	1.29708e+06	446399	472124	1.5749e+06	1.67713e+06	1.6572e+06	C08577	-
MWS3036	147.03	85.03	148.037	C5H8O5	[M-H]-	3-Hydroxyglutaric acid	Organic acids	Organic acids	638-18-6	3	4.22428e+06	4.00221e+06	2.31923e+06	4.03944e+06	6.13253e+06	4.58654e+06	4.13744e+06	1.88768e+06	3.76283e+06	2.66973e+06	2.46675e+06	3.28005e+06	1.97387e+06	2.04883e+06	2.32871e+06	2.30313e+06	2.3491e+06	2.45684e+06	-	-
mws1488	255.23	237.22	256.24	C16H32O2	[M-H]-	Palmitic acid	Lipids	Free fatty acids	57-10-3	3	189640	167947	176065	199080	222304	204559	277393	193096	286137	214667	240476	239356	200586	203381	225766	326241	312437	305674	C00249	ko00061,ko00062,ko00071,ko00073,ko01040,ko01100,ko01212
Zjhp090604	287.09	167.04	286.084	C16H14O5	[M+H]+	5,7-dihydroxy-3-(4'-hydroxybenzyl)-chroman-4-one	Flavonoids	Other Flavonoids	-	1	31622.6	46061	60219.8	2.28685e+07	2.63371e+07	2.77836e+07	1.88971e+07	1.98319e+07	1.50457e+07	4.69308e+06	5.23323e+06	4.76913e+06	2.68162e+06	3.1137e+06	3.97116e+06	7.53923e+06	8.04953e+06	7.89081e+06	-	-
MWSHC2099	527.16	331.08	526.148	C27H26O11	[M+H]+	Salcolin A*	Flavonoids	Flavones	369390-51-2	3	1.16375e+07	1.10966e+07	1.67735e+06	1.51977e+06	190402	1.45613e+06	2.45774e+06	398345	595366	3.12958e+07	1.33605e+07	8.34767e+06	6.63101e+06	5.30233e+06	7.36193e+06	6.58805e+06	7.01857e+06	6.93639e+06	-	-
MWSHC20163	255.24	255.24	256.24	C16H32O2	[M-H]-	Cetostearic acid	Lipids	Free fatty acids	-	3	6.93468e+07	6.55749e+07	6.43007e+07	8.01881e+07	8.70996e+07	7.21181e+07	1.05322e+08	7.29724e+07	109531845	9.19108e+07	8.43198e+07	8.57302e+07	7.78278e+07	7.90758e+07	8.34193e+07	1.21884e+08	1.14846e+08	1.21642e+08	-	-
pmb2319	482.32	184.07	481.317	C23H48NO7P	[M+H]+	LysoPC 15:0*	Lipids	LPC	108273-89-8	1	8.78319e+06	9.05525e+06	8.93347e+06	2.78113e+06	1.81933e+06	2.01983e+06	22157.4	94080.7	53795.1	58934.5	36046.2	67007.2	27255.2	18163.3	55417.8	2.16197e+06	2.30887e+06	2.26355e+06	-	-
pmd0132	496.34	184.07	495.332	C24H50NO7P	[M+H]+	LysoPC 16:0(2n isomer)*	Lipids	LPC	-	1	1.05323e+08	1.1227e+08	1.46456e+08	9.10689e+07	8.36871e+07	7.3232e+07	1.86244e+06	1.91402e+06	3.92719e+06	2.42958e+06	3.85715e+06	3.16538e+06	1.16937e+06	671088	3.15849e+06	4.25987e+07	4.55207e+07	4.44882e+07	-	-
MWSmce314	134.06	106.07	133.053	C8H7NO	[M+H]+	Oxindole	Alkaloids	Plumerane	59-48-3	3	519177	624457	170105	1.13251e+06	327045	1.1808e+06	1.61063e+06	1.61911e+06	1.63744e+06	1.14231e+06	1.13342e+06	1.24158e+06	1.16613e+06	1.10504e+06	1.0086e+06	1.03538e+06	1.02509e+06	1.09072e+06	C12312	ko00402,ko00999,ko01100,ko01110
Zmbp002538	205.1	146.06	204.09	C11H12N2O2	[M+H]+	1-Methoxy-indole-3-acetamide	Alkaloids	Plumerane	-	1	9.0887e+06	8.24843e+06	1.37773e+07	1.3134e+07	7.42126e+06	9.6852e+06	7.44039e+06	157099	7.88647e+06	2.14704e+07	2.24685e+07	2.04897e+07	2.43739e+07	2.3739e+07	2.35177e+07	1.6485e+07	1.62173e+07	1.72931e+07	-	-
pmb2787	293.21	275.2	294.219	C18H30O3	[M-H]-	9-Oxo-10E,12Z-octadecadienoic acid	Lipids	Free fatty acids	54232-59-6	3	4.15839e+06	4.46205e+06	7.28348e+06	1.49101e+06	3.93859e+06	1.27055e+06	994752	1.25181e+06	868812	2.02852e+06	1.53033e+06	1.84615e+06	1.28254e+06	1.15984e+06	1.29398e+06	2.15484e+06	2.27839e+06	2.29142e+06	C14766	ko00591
Qahn003953	261.13	201.11	262.142	C12H22O6	[M-H]-	Erigeside B	Others	Others	95632-87-4	2	872158	1.06387e+06	543177	150790	108381	107523	362192	402402	182333	1.60333e+06	1.59384e+06	1.40219e+06	2.06178e+06	1.74228e+06	1.52618e+06	1.04087e+06	1.10164e+06	1.03884e+06	-	-
pmb2855	307.11	145.06	308.122	C11H20N2O8	[M-H]-	L-Glutamine-O-glycoside	Amino acids and derivatives	Amino acids and derivatives	-	3	55057.6	36872.9	48118.2	165702	886298	316850	75437.7	77134.4	91044.2	76299.6	79769.3	74999.6	117119	94914.2	70237.7	115344	114531	108383	-	-
Lafp007563	219.17	121.1	218.167	C15H22O	[M+H]+	Costal	Terpenoids	Sesquiterpenoids	-	3	647872	638869	646278	801101	664369	759498	1.04476e+06	1.25278e+06	1.20314e+06	1.08672e+06	1.18076e+06	1.25749e+06	1.61675e+06	1.40142e+06	1.29332e+06	1.19562e+06	1.11913e+06	1.1443e+06	-	-
MWSHY0103	483.13	437.12	482.121	C25H22O10	[M+H]+	Silibinin	Flavonoids	Flavanonols	22888-70-6	3	126930	169714	160559	36172.3	12464.6	31196.7	16930.3	57671.3	37560.1	421341	398692	534678	439421	295686	359791	313194	293217	299467	C07610	-
Lmbn004240	329.23	199.13	330.241	C18H34O5	[M-H]-	9,10-Dihydroxy-12,13-epoxyoctadecanoic acid	Lipids	Free fatty acids	-	3	1.13604e+06	1.02905e+06	817911	450597	783377	745727	884285	840375	984682	2.21537e+06	1.8898e+06	1.52818e+06	2.11575e+06	2.33594e+06	2.30238e+06	1.65509e+06	1.76494e+06	1.74521e+06	C14837	ko00591
Wasn001627	295.1	89.02	296.111	C11H20O9	[M-H]-	Glucosyl 2,3-Dihydroxy-2-Methylbutanoic Acid	Organic acids	Organic acids	-	1	1.13035e+07	1.09142e+07	1.53338e+07	3.71525e+06	4.99031e+06	4.15662e+06	103040	41495.1	90054	43789.9	52170.2	26494.6	39741.2	33573.4	76847.7	2.37258e+06	2.50213e+06	2.52999e+06	-	-
pme2761	161.01	73.03	162.016	C5H6O6	[M-H]-	4-Hydroxy-2-oxoglutaric acid	Organic acids	Organic acids	1187-99-1	3	491818	283496	254706	240116	401378	129289	566669	577499	404857	682348	642217	871060	724146	544294	628778	619307	613564	581078	C01127	ko00630,ko01100
Lmdp005525	299.09	284.07	298.084	C17H14O5	[M+H]+	Afrormosin (6,4'-Dimethoxy-7-Hydroxyisoflavone)	Flavonoids	Isoflavones	550-79-8	2	1.98467e+07	2.05305e+07	1.36794e+07	104198	74580.2	139614	226793	157257	216947	2.69473e+07	3.30473e+07	2.60617e+07	4.87638e+07	3.74896e+07	4.70929e+07	2.20809e+07	2.3496e+07	2.22553e+07	C10199	-
Lmjn004351	331.05	165.99	332.053	C16H12O8	[M-H]-	Quercetagetin-4'-Methyl Ether	Flavonoids	Flavonols	-	2	12969.8	12882.4	4665.52	36930.7	150068	2636.62	9.33409e+06	1.26899e+06	9.8879e+06	903798	2.09798e+06	1.57227e+06	943713	1.36446e+06	1.23563e+06	1.21858e+06	1.27865e+06	1.19768e+06	-	-
Lmjp003722	375.14	357.13	374.137	C20H22O7	[M+H]+	2'-Hydroxy-3,4,5,4',6'-pentamethoxychalcone	Flavonoids	Chalcones	-	3	1.18974e+06	1.1345e+06	563130	1.97798e+06	2.86135e+06	1.48257e+06	969117	4.93514e+06	933878	942872	838405	1.04828e+06	1.03251e+06	1.11754e+06	1.18921e+06	1.25158e+06	1.3006e+06	1.34013e+06	-	-
mws0847	150.08	133.05	149.07	C6H7N5	[M+H]+	1-Methyladenine	Nucleotides and derivatives	Nucleotides and derivatives	5142-22-3	3	1.09166e+06	1.36059e+06	597975	167498	480358	153181	527889	266364	872508	2.02364e+06	2.27889e+06	2.06529e+06	2.87397e+06	2.56167e+06	2.49762e+06	1.77306e+06	1.7504e+06	1.86669e+06	C02216	-
Wagp009413	375.11	345.06	374.1	C19H18O8	[M+H]+	5,7-Dihydroxy-3,4',6,8-tetramethoxyflavone*	Flavonoids	Flavones	50461-86-4	1	69129.8	58851.3	1.31329e+06	4.5154e+07	5.03659e+07	5.69561e+07	5.63734e+07	6.48331e+07	4.62466e+07	2.04626e+07	2.3038e+07	2.14137e+07	1.49153e+07	1.58589e+07	1.11884e+07	2.14515e+07	2.29756e+07	2.21521e+07	-	-
MWSHY0189	433.11	271.07	432.106	C21H20O10	[M+H]+	Apigenin-7-O-glucoside(Cosmosiin)	Flavonoids	Flavones	578-74-5	1	1.94567e+07	1.51061e+07	1.95165e+07	1.87587e+06	1.28564e+06	1.92152e+06	78795.2	115938	79920.8	485643	251899	436221	540397	172436	322245	6.14653e+06	5.82544e+06	5.76954e+06	C04608	ko00944
Lmsn010604	501.32	421.31	502.329	C30H46O6	[M-H]-	2,3,19-Trihydroxyurs-12-en-23-formyl-28-oic Acid	Terpenoids	Triterpene	-	2	7989.95	9750.07	18962.7	2358.79	2550.97	4296.79	3941.73	6587.46	2550.27	81821.5	128069	73081.4	350086	258662	268491	120803	124273	129372	-	-
Smpn011792	471.35	471.34	472.355	C30H48O4	[M-H]-	2,3-Dihydroxy-12-ursen-28-oic acid	Terpenoids	Triterpene	-	3	44444.8	166115	111658	25503.7	55299.2	162771	105772	97448.9	72946.6	1.3402e+07	1.53427e+07	1.25681e+07	2.16539e+07	1.95106e+07	1.75762e+07	1.12593e+07	1.05569e+07	1.06835e+07	-	-
Cmmn013275	301.22	301.22	302.225	C20H30O2	[M-H]-	Isopimaric acid*	Terpenoids	Ditepenoids	5835-26-7	2	428436	424964	361820	1.36538e+07	6.64877e+06	7.21628e+06	6.37828e+06	7.95994e+06	1.03129e+07	1.81436e+06	2.2995e+06	2.49435e+06	1251730	2.36523e+06	1.44481e+06	3.60589e+06	3.67416e+06	3.43427e+06	-	-
mws0425	129.02	85.03	130.027	C5H6O4	[M-H]-	Citraconic acid	Organic acids	Organic acids	498-23-7	3	692560	776022	557684	1.05124e+06	1.39335e+06	1.03934e+06	2.27233e+06	2.37062e+06	2.2276e+06	1.10695e+06	1.27762e+06	1.3137e+06	1.14883e+06	1.05582e+06	877750	1.2664e+06	1.21734e+06	1.1821e+06	C02226	ko00290,ko00660,ko01100,ko01210
MWS201458	279.17	120.09	278.163	C15H22N2O3	[M+H]+	Phe-Ile	Amino acids and derivatives	Amino acids and derivatives	22951-94-6	1	1327835	513479	2.48191e+06	124948	1.76395e+06	218505	4.14475e+06	1.5307e+06	2.74857e+06	3.45433e+06	3.08781e+06	4.95326e+06	2.97783e+06	2.48489e+06	2.67064e+06	2.88918e+06	3.09437e+06	3.02574e+06	-	-
Hmjn003948	487.35	487.35	488.35	C30H48O5	[M-H]-	2,3,6-Trihydroxyurs-12-en-28-oic acid (Madasiatic acid)*	Terpenoids	Triterpene	26532-66-1	3	288779	465198	37754.3	15944.5	5554.72	7021.86	18444.4	24103	12682.3	1.96561e+06	2.04036e+06	1.59236e+06	7.48604e+06	6.00809e+06	7.0157e+06	3.00296e+06	2.96454e+06	2.8106e+06	-	-
Wbmp001002	152.07	107.05	151.063	C8H9NO2	[M+H]+	4-methoxybenzamide	Alkaloids	Alkaloids	3424-93-9	2	1.55179e+07	9.10861e+06	1.98113e+07	558680	6.00115e+06	1.31869e+06	5.20468e+06	3.84819e+06	3.45773e+06	2.94236e+06	2.34178e+06	3.28221e+06	1.82562e+06	1.41995e+06	2.95358e+06	5.10206e+06	4.9012e+06	4.76137e+06	-	-
Hmcn007243	263.13	219.13	264.136	C15H20O4	[M-H]-	Artemisiifolin	Terpenoids	Sesquiterpenoids	26931-87-3	2	60141	60671.3	92816.9	1.05088e+06	1.01472e+06	845484	1.42188e+06	1.56613e+06	1.43839e+06	766239	731671	803860	502026	511895	411818	561639	564762	597738	C09304	-
mws0853	209.08	179.07	210.089	C11H14O4	[M-H]-	Sinapyl alcohol*	Phenolic acids	Phenolic acids	537-33-7	2	523341	429022	415138	2.36734e+06	1.09609e+06	1.16073e+06	503375	480441	459902	239614	211188	236546	182735	156629	138217	492815	486378	461195	C02325	ko00940,ko01100,ko01110
pme0257	111.02	67.03	112.027	C4H4N2O2	[M-H]-	Uracil	Nucleotides and derivatives	Nucleotides and derivatives	66-22-8	3	481223	506798	423887	865061	858129	1.09812e+06	324192	113341	93496.8	68750.8	62308.6	70836.5	66620.6	57520.7	60752.8	176413	167448	165195	C00106	ko00240,ko00410,ko00770,ko01100,ko01232
Lakn001671	329.09	123.05	330.095	C14H18O9	[M-H]-	2-β-D-Glucopyranosyloxy-5-hydroxy-phenylacetic acid	Phenolic acids	Phenolic acids	-	2	329519	240271	662700	1.92825e+06	1.36212e+06	1.78967e+06	8019.41	6807.08	21775.4	27889.3	9507.23	8780.57	6035.6	2928.64	22851.6	258450	254501	271963	-	-
MWSmce203	341.12	73.03	342.116	C12H22O11	[M-H]-	D-Cellobiose	Others	Saccharides	528-50-7	3	1.00752e+06	869229	799360	941184	734067	564259	306431	96537.8	328061	47032.2	79686.4	80209.1	33860.5	15345	58041.8	852718	803943	856755	-	-
pme2693	131.12	114.09	130.111	C6H14N2O	[M+H]+	N-Acetylputrescine	Alkaloids	Alkaloids	18233-70-0	3	833954	571518	625638	317031	1.44892e+06	768994	622718	1.56468e+06	696835	1.25647e+06	1.48256e+06	1.19719e+06	2.14302e+06	1.92376e+06	1.56578e+06	2.13723e+06	2.09828e+06	1.99605e+06	C02714	ko00330,ko01100
Zmrp110405	457.37	439.36	456.36	C30H48O3	[M+H]+	3-Hydroxylup-20(29)-en-24-oic acid	Terpenoids	Triterpene	-	3	30313.9	32544.8	26477.2	38831.6	19804.5	27644.3	24669.1	28827.7	25633	26695.2	28154.8	26953.6	23987.6	33792.9	25305.7	24359.1	25335	26134.1	-	-
Sacn003282	403.12	241.07	404.132	C17H24O11	[M-H]-	10-hydroxymajoroside	Phenolic acids	Phenolic acids	-	3	3.20962e+06	510799	75333.6	925502	270741	1.15068e+06	632060	669144	731317	574785	509709	507594	568598	442710	540438	647179	665770	693924	-	-
mws0376	115	71.01	116.011	C4H4O4	[M-H]-	Fumaric acid	Organic acids	Organic acids	110-17-8	3	2.08109e+06	1.47211e+06	4.43189e+06	5.35422e+06	7.94437e+06	5.33905e+06	1.76078e+06	1.72575e+06	1.61725e+06	380391	377838	508592	321688	173700	232191	1.32474e+06	1.41009e+06	1.40828e+06	C00122	ko00020,ko00190,ko00220,ko00250,ko00350,ko00360,ko00620,ko00650,ko00760,ko01100,ko01110,ko01200
MWS4301	151.04	107.05	152.047	C8H8O3	[M-H]-	3-hydroxyphenylacetic acid*	Phenolic acids	Phenolic acids	621-37-4	2	197337	213833	190741	61266	197897	73273.9	189238	306803	278434	400384	429368	393384	406596	371853	361120	300339	322284	312988	C05593	ko00350,ko00360,ko01100
MWSmce370	151.04	107.05	152.047	C8H8O3	[M-H]-	4-Hydroxyphenylacetic acid*	Phenolic acids	Phenolic acids	156-38-7	2	197337	213833	190741	61266	197897	73273.9	189238	306803	278434	400384	429368	393384	406596	371853	361120	300339	322284	312988	C00642	ko00350,ko00360,ko01100
Lmbn001930	121.03	77.04	122.037	C7H6O2	[M-H]-	2-Hydroxybenzaldehyde (Salicylaldehyde)	Phenolic acids	Phenolic acids	90-02-8	3	349145	350186	462386	175380	242963	216499	308320	352824	323702	346868	351469	326473	359857	349803	329046	300958	319969	320392	C06202	ko01100
mws4173	207.07	192.04	206.058	C11H10O4	[M+H]+	5,7-Dimethoxycoumarin (Limettin)(Citropten)	Lignans and Coumarins	Coumarins	487-06-9	3	90179.2	164269	121200	466084	1.5986e+06	424572	412040	569109	489539	215272	336009	198652	210150	767405	143410	377336	351609	366624	-	-
Hmdn006566	455.35	455.35	456.36	C30H48O3	[M-H]-	3,4-Open loop-lupine-4(23),20(29)-diene-24-hydroxy-3-carboxylic acid	Terpenoids	Triterpene	-	2	72792.3	72996.9	64485.3	18085.4	26502.9	63138.8	101055	43058.8	89444.2	95426.3	116287	126288	76058.9	101539	111851	109077	105262	112987	-	-
Lcsp001901	374.23	199.18	373.221	C17H31N3O6	[M+H]+	Leu-Ile-Glu	Amino acids and derivatives	Amino acids and derivatives	-	1	6.19854e+06	3.5922e+06	1.10651e+07	139952	1.48103e+06	102361	868631	327660	559939	628083	582686	896970	570071	439656	519150	1.66788e+06	1.78966e+06	1.74222e+06	-	-
MWSmce413	251.04	207.05	252.042	C15H8O4	[M-H]-	Anthraquinone-2-carboxylic acid	Quinones	Anthraquinone	117-78-2	3	257663	256848	267204	43056.7	43440	165897	163741	163643	101744	611846	599705	605800	650066	601659	628078	494557	524043	491901	-	-
pmb0034	277.1	148.06	276.096	C10H16N2O7	[M+H]+	L-α-Glutamyl-L-Glutamic Acid	Amino acids and derivatives	Amino acids and derivatives	3929-61-1	3	457774	265190	336890	221400	556336	324908	136218	20092.9	62309.2	30122.8	101323	65451.6	87874.4	82776	96746	229603	240695	246265	C01425	-
Wcsn000472	503.16	113.02	504.169	C18H32O16	[M-H]-	Laminaran	Others	Saccharides	9008-22-4	3	1.40103e+06	1.02596e+06	933030	527410	552611	762662	29903.6	18607.1	27981.2	8672.3	91544.4	24387.8	34506.7	34365.8	113798	731051	779400	735826	-	-
pme3337	384.12	252.07	383.108	C14H17N5O8	[M+H]+	Succinyladenosine	Nucleotides and derivatives	Nucleotides and derivatives	4542-23-8	1	9.49134e+07	9.50666e+07	8.77459e+07	2.85472e+07	9.45115e+07	3.94689e+07	2.03762e+07	1.07392e+07	2.2423e+07	7.65524e+06	6.40647e+06	1.0025e+07	2.31349e+06	3.37734e+06	1.11137e+07	2.92992e+07	3.04236e+07	3.1462e+07	-	-
Hmln000659	331.07	169.01	332.074	C13H16O10	[M-H]-	3-O-Galloyl-D-glucose*	Phenolic acids	Phenolic acids	-	3	564185	269304	1.717e+06	1.94382e+06	1.73486e+06	4.41703e+06	64408.3	32529.6	58505	22478.9	35474.3	44862.4	40015.8	24849.8	24330	478994	447725	454698	-	-
MWS20190	361.09	346.07	360.084	C18H16O8	[M+H]+	5,7,4'-trihydroxy-6,3',5'-trimethoxyisoflavone	Flavonoids	Isoflavones	-	1	106162	138145	97616.6	2.42788e+07	2.62263e+07	2.54288e+07	2.59719e+07	2.95942e+07	2.24693e+07	8.29336e+06	1.02164e+07	8.34849e+06	5.30738e+06	5.79994e+06	5.25874e+06	8.85208e+06	9.4614e+06	9.37266e+06	-	-
pme0519	341.11	119.03	342.116	C12H22O11	[M-H]-	D-Sucrose*	Others	Saccharides	57-50-1	1	7354672	8.90024e+06	6.65778e+06	6.75731e+06	4.84548e+06	3.48196e+06	1.98729e+06	488636	1.92149e+06	212932	490849	396946	232369	178807	290365	7.56968e+06	8.12441e+06	7.92716e+06	C00089	ko00052,ko00500,ko01100,ko01110,ko02010
Lmhn003801	531.12	337.06	532.122	C25H24O13	[M-H]-	Feruloylsinapoyltartaric acid	Phenolic acids	Phenolic acids	-	2	1.85006e+06	2.34365e+06	5.54004e+06	21795.3	21322.1	30322.7	8542.27	10099.4	7586.37	55308.9	20387.2	22743.1	54886.4	63134.9	42110.8	925381	862716	884365	-	-
Zbqn002253	218.1	88.04	219.111	C9H17NO5	[M-H]-	6-(((S)-1-carboxyethyl)amino)-4-hydroxyhexanoicacid	Amino acids and derivatives	Amino acids and derivatives	-	1	2.83009e+07	3.17281e+07	2.64964e+07	8.19755e+06	1.90283e+07	9.26983e+06	8.9903e+06	1.01215e+07	9.52199e+06	2.74567e+07	2.64208e+07	2.60477e+07	3.67648e+07	3.29777e+07	2.92865e+07	2.46999e+07	2.40863e+07	2.30101e+07	-	-
Lmhp002031	245.19	86.1	244.179	C12H24N2O3	[M+H]+	L-Leucyl-L-Leucine	Amino acids and derivatives	Amino acids and derivatives	3303-31-9	1	2.41168e+07	12194278	6.29008e+07	815658	8.02866e+06	737486	1.38377e+07	6.1054e+06	1.31632e+07	1.2836e+07	1.12739e+07	1.67262e+07	9.65602e+06	7.53011e+06	9.09352e+06	1.55366e+07	1.47064e+07	1.57408e+07	-	-
pmf0397	311.3	311.3	312.303	C20H40O2	[M-H]-	Arachidic acid	Lipids	Free fatty acids	506-30-9	3	2.18673e+07	2.08036e+07	2.48024e+07	2.5702e+07	2.16519e+07	1.99652e+07	2.03757e+07	2.3344e+07	2.08902e+07	2.1695e+07	2.27656e+07	2.41758e+07	2.27168e+07	2.5406e+07	2.16846e+07	1.97847e+07	2.06442e+07	2.12478e+07	C06425	ko01040
Zmgn004894	151.04	136.02	152.047	C8H8O3	[M-H]-	Methyl 4-hydroxybenzoate	Phenolic acids	Phenolic acids	99-76-3	3	255718	251782	246588	246380	373868	212542	633614	1.70025e+06	634326	358790	437340	763886	410595	701729	652514	594310	635485	629162	-	-
Qmqp102515	247.13	187.11	246.126	C15H18O3	[M+H]+	Leucodin	Terpenoids	Sesquiterpenoids	17946-87-1	1	2.5231e+06	2.51101e+06	3.08418e+06	722736	723753	548241	465552	485201	664482	1.99168e+06	2.21015e+06	1.60737e+06	2.05932e+06	2.27761e+06	2.14552e+06	1.7801e+06	1.66897e+06	1.77349e+06	-	-
mws0192	117.02	73.03	118.027	C4H6O4	[M-H]-	Succinic acid*	Organic acids	Organic acids	110-15-6	1	4.4239e+06	4.83063e+06	6.31648e+06	3.83167e+06	3.61058e+06	2.86136e+06	5.14551e+06	2.66513e+07	2.34038e+07	2.82025e+07	2.85923e+07	2.67569e+07	2.97873e+07	2.93992e+07	2.65597e+07	2.20248e+07	2.15966e+07	2.0537e+07	C00042	ko00020,ko00190,ko00250,ko00310,ko00350,ko00360,ko00620,ko00630,ko00640,ko00650,ko00760,ko00920,ko01100,ko01110,ko01200
WaYn002469	409.15	165.06	410.158	C20H26O9	[M-H]-	4',8''-Bisguaiacylglycerol*	Lignans and Coumarins	Lignans	-	1	436798	482615	632407	6.11693e+06	2.61309e+06	3.07862e+06	7.53915e+06	7.71354e+06	8.05457e+06	3.8536e+06	3.59709e+06	4.16115e+06	2.92042e+06	2.65134e+06	2.61951e+06	3.05061e+06	3.1206e+06	3.2715e+06	-	-
Qmqp102523	249.15	175.11	248.141	C15H20O3	[M+H]+	Pechueloic acid	Terpenoids	Sesquiterpenoids	115473-63-7	3	210923	130942	218499	3.00108e+06	2.36609e+06	2.30294e+06	3.16303e+06	6.14139e+06	1.3979e+07	640181	1.05371e+06	768638	762887	491226	458897	1.57268e+06	1.68097e+06	1.66674e+06	-	-
mws0972	131.07	85.07	132.079	C6H12O3	[M-H]-	6-Hydroxyhexanoic acid	Organic acids	Organic acids	1191-25-9	2	8.99363e+06	1.2159e+07	8.14883e+06	4.1883e+06	7.52648e+06	4.54087e+06	5.42007e+06	5.75847e+06	5.58396e+06	4.70838e+06	4.99112e+06	5.06328e+06	4.62184e+06	4.36e+06	3.97809e+06	5.12848e+06	5.48351e+06	5.1926e+06	C06103	-
Zaxn005652	315.2	315.2	316.204	C20H28O3	[M-H]-	Pisiferic acid	Terpenoids	Ditepenoids	67494-15-9	2	1.4305e+07	1.26035e+07	1.05901e+07	5.65378e+06	8.82514e+06	8.20436e+06	1.14037e+07	3.29451e+07	7.70064e+06	1.11171e+07	1.05502e+07	1.07609e+07	1.053e+07	9.69991e+06	1.02031e+07	1.0624e+07	1.11609e+07	1.14e+07	C09163	ko00904,ko01110
pmf0139	179.06	59.01	180.063	C6H12O6	[M-H]-	D-Galactose*	Others	Saccharides	59-23-4	1	7.31871e+06	6.63525e+06	7.95722e+06	5.14454e+06	5.81153e+06	5.24162e+06	1.84958e+06	837916	1.31853e+06	2.37305e+06	2.35209e+06	2.36526e+06	2.75715e+06	2.75475e+06	3.12197e+06	3.94273e+06	4.1824e+06	4.21248e+06	C00124	ko00052,ko01100
pme2710	211.13	167.14	212.141	C12H20O3	[M-H]-	Dihydrojasmonic acid	Organic acids	Organic acids	3572-64-3	3	377132	347779	313888	138089	108891	155060	370344	573747	394078	1.79235e+06	1.96977e+06	1.87195e+06	2.34297e+06	1.9457e+06	2.21202e+06	1.51176e+06	1.49043e+06	1.41088e+06	-	-
MWSHY0102	303.05	229.05	302.043	C15H10O7	[M+H]+	Morin	Flavonoids	Flavonols	480-16-0	3	248606	123390	204332	164534	199170	187897	7.53279e+06	987650	1.08781e+07	1.21378e+07	5.75849e+06	6.04544e+06	1.93806e+06	1.40389e+06	3.32426e+06	2.91744e+06	3.11858e+06	2.94716e+06	C10105	-
mws0906	341.12	179.07	342.132	C16H22O8	[M-H]-	Coniferin	Phenolic acids	Phenolic acids	531-29-3	2	7.12028e+06	7.46139e+06	1.12892e+07	5.63492e+07	1.90041e+07	5.18232e+07	1.22684e+06	335400	1.04604e+06	810521	661865	764441	749112	826357	2.33936e+06	9.26135e+06	9.36716e+06	9.90509e+06	C00761	ko00940,ko01110
MWSHC20189	357.13	151.04	358.142	C20H22O6	[M-H]-	Epipinoresinol*	Lignans and Coumarins	Lignans	24404-50-0	3	727596	449259	732588	7.53783e+06	6.19245e+06	1.17411e+07	3.17477e+07	2.84367e+07	3.46628e+07	9.97843e+06	7.32297e+06	1.42893e+07	5.3014e+06	7.09184e+06	5.75376e+06	8.35925e+06	8.87012e+06	8.93903e+06	-	-
ML10181668	130.09	84.08	129.079	C6H11NO2	[M+H]+	Cycloleucine	Amino acids and derivatives	Amino acids and derivatives	52-52-8	1	4.97307e+06	4.8825e+06	4.54375e+06	2.78303e+06	6.06926e+06	2.08501e+06	773207	568039	1.45559e+06	2.19724e+06	2.39388e+06	2.3208e+06	2.79612e+06	2.53016e+06	3.37964e+06	2.66411e+06	2.7373e+06	2.54656e+06	C03969	-
pme2060	204.12	136.06	203.117	C10H13N5	[M+H]+	N6-Isopentenyladenine	Nucleotides and derivatives	Nucleotides and derivatives	2365-40-4	3	165485	150018	73735.9	24912.5	12452.9	32359.7	422651	109453	423401	1.20173e+06	1.29497e+06	1.23146e+06	1.53552e+06	1.12117e+06	1.39683e+06	803319	847075	790756	C04083	ko00908,ko01110,ko04075
mws2623	281.25	281.25	282.256	C18H34O2	[M-H]-	11-Octadecanoic acid(Vaccenic acid)*	Lipids	Free fatty acids	506-17-2	1	1.21726e+06	1.25126e+06	709709	1.03325e+06	2.31869e+06	1.0268e+06	2.47165e+06	2.441e+06	2.33576e+06	3.17636e+06	2.69317e+06	2.793e+06	2.94794e+06	2.32001e+06	2.5409e+06	2.13152e+06	2.08831e+06	1.9852e+06	C21944	-
pmd0157	509.29	153	510.296	C24H47O9P	[M-H]-	LysoPG 18:1	Lipids	Glycerol ester	-	3	5148.16	12064.4	16015.5	40049.3	6301.49	5328.4	8839.54	3329.53	5499.91	19983	15566	16042.1	24628.8	21762.9	17227.9	11171.4	11139.5	10468	-	-
MWSHY0032	269.08	213.09	268.074	C16H12O4	[M+H]+	Formononetin (7-Hydroxy-4'-methoxyisoflavone)	Flavonoids	Isoflavones	485-72-3	1	2.04502e+07	1.39341e+07	6.0088e+06	170105	181637	237182	217849	285962	259318	1.01822e+07	1.43951e+07	1.07676e+07	2.18349e+07	1.50094e+07	2.90854e+07	1.4992e+07	1.48179e+07	1.58518e+07	C00858	ko00943,ko01100,ko01110
mws0097	357.13	151.04	358.142	C20H22O6	[M-H]-	Pinoresinol*	Lignans and Coumarins	Lignans	487-36-5	3	751483	498434	650430	7.34381e+06	6.58712e+06	1.12879e+07	3.16954e+07	2.70062e+07	3.27555e+07	1.00404e+07	7.11146e+06	1.34735e+07	4.81582e+06	6.95836e+06	5.37109e+06	8.20445e+06	8.81433e+06	8.61361e+06	C05366	ko00999,ko01100,ko01110
Zbqp002511	146.12	55.05	145.11	C7H15NO2	[M+H]+	N-Methylisoleucine	Amino acids and derivatives	Amino acids and derivatives	39554-61-5	2	100816	131448	27384	2.11856e+06	1.17211e+07	594236	5.29106e+06	733415	4.59406e+06	1.44949e+06	2.19373e+06	1.90543e+06	1.44662e+06	2.19417e+06	910789	1.97818e+06	1.84556e+06	1.87622e+06	-	-
Lmzn006284	471.35	471.35	472.355	C30H48O4	[M-H]-	2-Hydroxyursolic acid*	Terpenoids	Triterpene	-	2	23360.9	45758.4	21815	15964.4	17710	116829	26715.7	17039.1	26398.9	3.98919e+06	4.24806e+06	3.65936e+06	5.45787e+06	5.82227e+06	5.32588e+06	2.7573e+06	2.61383e+06	2.57286e+06	-	-
pmb0745	497.14	331.08	496.137	C26H24O10	[M+H]+	Tricin-4'-O-syringyl alcohol	Flavonoids	Flavones	-	3	2.97817e+06	3.01413e+06	730714	232358	18049.9	61279.6	328026	95085.3	105083	8.17275e+06	3.92886e+06	1.9567e+06	2.78247e+06	2.30259e+06	2.72854e+06	2.15425e+06	2.2872e+06	2.14219e+06	-	-
mws1320	160.08	130.07	161.084	C10H11NO	[M-H]-	Tryptophol	Alkaloids	Plumerane	526-55-6	2	40280.8	51574.2	25401.6	145176	148582	184448	695914	283125	675702	595107	677022	627885	573532	631815	586157	340190	334882	317033	C00955	ko00380
Lmcn004052	643.24	417.16	644.247	C33H40O13	[M-H]-	Buddlenol D	Phenolic acids	Phenolic acids	97465-75-3	3	110527	62004.5	69088.5	290818	246618	355921	876332	660689	1.06252e+06	480677	564248	659856	407418	379602	443340	395047	369293	392346	-	-
Zmyn004548	291.2	235.17	292.204	C18H28O3	[M-H]-	12-Oxo-phytodienoic acid	Lipids	Free fatty acids	85551-10-6	2	1.39167e+07	1.00745e+07	2.00706e+07	892927	7.04576e+06	1.80316e+06	2.17657e+06	6.54658e+06	2.15847e+06	1.07516e+07	6.91319e+06	1.03173e+07	6.56233e+06	7.0807e+06	8.87104e+06	1.02899e+07	9.90866e+06	1.06643e+07	C01226	ko00592,ko01100,ko01110
Zmyn006119	328.08	284.09	329.09	C17H15NO6	[M-H]-	Avenanthramide B	Alkaloids	Phenolamine	108605-69-2	2	1.05396e+06	1.07709e+06	827452	316974	248715	379415	717750	805229	765157	1.84927e+06	1.95501e+06	1.76763e+06	2.831e+06	2.26281e+06	1.98197e+06	1.42815e+06	1.48752e+06	1.53706e+06	-	-
Wayn004064	491.05	315.01	492.054	C21H16O14	[M-H]-	3'-O-Methylellagic acid-4-O-glucuronide	Tannins	Tannin	-	2	2.2364e+07	2.16525e+07	5.31046e+07	180724	56921.5	37505.1	28281.1	26675	37579.2	464321	281272	433878	253144	214459	191649	1.03847e+07	1.09355e+07	1.11571e+07	-	-
MWSslk092	343.08	328.06	344.09	C18H16O7	[M-H]-	Usnic acid	Phenolic acids	Phenolic acids	125-46-2	3	89166.4	99849.4	73657	73482.2	67314.7	141317	113325	96242.9	96998.1	95651	175893	131791	139870	100671	111499	104804	107952	112722	C10101	-
Zmdn001863	325.07	193.05	326.079	C18H14O6	[M-H]-	2-(7-Dihydroxyl)-benzofuranyl-ferulic acid	Phenolic acids	Phenolic acids	-	2	846416	278768	616688	145823	139627	149973	358495	223926	348611	228973	205292	249673	143387	139132	137207	212030	226123	212613	-	-
pme0230	268.1	136.06	267.097	C10H13N5O4	[M+H]+	Adenosine	Nucleotides and derivatives	Nucleotides and derivatives	58-61-7	1	102407670	9.63904e+07	1.13789e+08	2.13777e+07	3.38299e+07	1.96041e+07	5.62774e+06	1.36607e+07	1.23537e+07	6.26405e+06	8.87528e+06	1.31305e+07	1.33903e+07	1.0459e+07	4.58195e+07	2.53842e+07	2.72539e+07	2.67935e+07	C00212	ko00230,ko01100,ko01232,ko02010
Lcsp001547	344.18	70.07	343.174	C15H25N3O6	[M+H]+	Pro-Leu-Asp	Amino acids and derivatives	Amino acids and derivatives	-	1	1.39588e+06	940110	1.13223e+06	17927.8	227179	32689	489054	139632	502480	1.6829e+06	1.41378e+06	1.69803e+06	1.31357e+06	1.25866e+06	1.22837e+06	1.26344e+06	1.30178e+06	1.20932e+06	-	-
pmd0130	468.31	184.07	467.301	C22H46NO7P	[M+H]+	LysoPC 14:0	Lipids	LPC	20559-16-4	1	3.2556e+06	3.55147e+06	2.4541e+06	901236	1.30899e+06	1.36464e+06	23510.1	126619	11896.6	21381.8	36965.6	31021.3	32825.8	32140.2	39203.9	865646	931485	892274	-	-
mws0463	301.07	164.01	302.079	C16H14O6	[M-H]-	Hesperetin	Flavonoids	Flavanones	520-33-2	3	349086	248077	516084	249808	169585	252020	932755	917595	1.06486e+06	813715	611617	719657	671107	474420	479891	551554	582203	542902	C01709	ko00941
Lazn005628	809.3	565.21	810.31	C42H50O16	[M-H]-	Hedyotisol B	Lignans and Coumarins	Lignans	95839-45-5	2	99220.1	59837	63497	222142	225331	244944	970901	879365	895214	503378	390092	606288	270544	282528	324883	387435	399017	416877	-	-
mws0066	315.05	151	316.058	C16H12O7	[M-H]-	Isorhamnetin; 3'-Methoxy-3,4',5,7-Tetrahydroxyflavone	Flavonoids	Flavonols	480-19-3	1	30920	9939.31	52754.9	28036.5	133157	11308	1.6996e+07	1.48752e+06	1.03204e+07	1.13143e+07	7.06914e+06	9.42215e+06	5.54695e+06	3.53149e+06	6.21606e+06	4.48624e+06	4.63752e+06	4.30676e+06	C10084	-
Lmbn001288	131.03	87.04	132.042	C5H8O4	[M-H]-	2-Hydroxy-2-methyl-3-oxobutanoic acid*	Organic acids	Organic acids	71698-08-3	2	836101	868063	609007	529757	1.50343e+06	482135	992145	1.03341e+06	1.08363e+06	1.28486e+06	1.35074e+06	1.30104e+06	1.48022e+06	1.49409e+06	1.27467e+06	1.07132e+06	1.089e+06	1.01408e+06	C06010	ko00290,ko00650,ko00660,ko00770,ko01100,ko01110,ko01210,ko01230
MWS04412	175.12	70.07	174.137	C8H18N2O2	[M+H]+	N(6),N(6)-Dimethyl-L-lysine	Amino acids and derivatives	Amino acids and derivatives	2259-86-1	2	1.47875e+08	9.37581e+07	1.46169e+08	524035810	2.53213e+08	1.80892e+08	1.01196e+07	5.59703e+06	8.52402e+06	1.33082e+07	1.45937e+07	1.64971e+07	1.24827e+07	7.64875e+06	1.1229e+07	6.8732e+07	6.47346e+07	6.42944e+07	-	-
MWS1962	153.13	83.05	152.12	C10H16O	[M+H]+	cis-Citral	Terpenoids	Monoterpenoids	5392-40-5	3	1.31673e+06	1.3384e+06	1.54405e+06	1.55507e+06	1.61616e+06	1.69747e+06	2.9765e+06	2.77636e+06	1.63114e+06	2.07608e+06	2.07971e+06	2.22035e+06	1.48027e+06	1.46328e+06	1.51471e+06	2.19375e+06	2.36262e+06	2.2895e+06	C09847	ko01110
Wcfn006909	329.06	299.02	330.074	C17H14O7	[M-H]-	(2Z)-4,6-Dihydroxy-2-[(4-Hydroxy-3,5-Dimethoxyphenyl)Methylidene]-1-Benzofuran-3-One	Others	Others	-	3	592763	703578	506846	252422	264835	318325	304986	274570	229370	3.28905e+06	3.19329e+06	3.20308e+06	3.53424e+06	2.96997e+06	3.26427e+06	2.4452e+06	2.43561e+06	2.60072e+06	-	-
Lthp012104	251.16	159.12	250.157	C15H22O3	[M+H]+	4β,14,11α,13-tetrahydroglucozaluzanin C	Terpenoids	Sesquiterpenoids	-	1	104725	49130.9	279262	722542	752274	762143	933545	879490	1.59718e+06	485709	502555	665028	500532	335558	355033	434993	406992	433704	-	-
Lmhn002140	325.06	193.05	326.064	C14H14O9	[M-H]-	Feruloyltartaric acid (Fertaric acid)	Phenolic acids	Phenolic acids	-	2	869268	293735	646041	180906	178166	178904	420693	246224	421156	307514	254211	282652	216030	173004	101211	256395	268850	276026	-	-
mws4175	175.02	85.03	176.032	C6H8O6	[M-H]-	D-Glucurono-6,3-lactone	Others	Saccharides	32449-92-6	3	513225	348667	377379	500860	753051	348562	439771	413161	510089	401115	209560	512674	277030	273429	504201	457329	492473	480242	C02670	ko00053,ko01100
mws0177	111.01	67.02	112.016	C5H4O3	[M-H]-	2-Furoic acid	Organic acids	Organic acids	88-14-2	3	559583	493325	286409	631880	1.18534e+06	596038	5.14791e+07	3.43596e+07	47974890	1.96685e+07	1.82277e+07	2.35577e+07	1.10809e+07	9.92205e+06	1.08804e+07	1.20532e+07	1.22071e+07	1.13695e+07	C01546	ko01100
MWSmce632	195.06	93.03	194.058	C10H10O4	[M+H]+	Vanillin acetate	Phenolic acids	Phenolic acids	881-68-5	3	4.87084e+06	4.53466e+06	5.14899e+06	2.48215e+06	3.68785e+06	2.39839e+06	605271	1.82597e+06	635751	1.76326e+06	1.30864e+06	1.67355e+06	1.77899e+06	1.75161e+06	1.74569e+06	2.59644e+06	2.41294e+06	2.47218e+06	-	-
mws0025	125.02	79.02	126.032	C6H6O3	[M-H]-	Pyrogallol	Phenolic acids	Phenolic acids	87-66-1	3	43904.8	13552.4	26821.9	33583.3	12190.1	44021.8	258072	61272.2	309614	222695	159802	224794	99667.8	87260.3	140368	104708	100722	97130.9	C01108	-
mws0396	281.25	281.25	282.256	C18H34O2	[M-H]-	Elaidic Acid*	Lipids	Free fatty acids	112-79-8	1	1.20611e+06	1.24481e+06	673604	1.03802e+06	2.24467e+06	1.0738e+06	2.54004e+06	2.5418e+06	2.33587e+06	3.20119e+06	2.91356e+06	2.66124e+06	3.07586e+06	2.36313e+06	2.44908e+06	2.17559e+06	2.10931e+06	2.01725e+06	C01712	-
Wahp006114	584.28	438.24	583.268	C34H37N3O6	[M+H]+	Tri-p-coumaroyl Spermidine	Alkaloids	Phenolamine	-	3	807407	3.31513e+06	1.17318e+07	3163085	2180640	9.13179e+06	3.47138e+06	3.81145e+06	3.55882e+06	8.39629e+06	1.27934e+07	1.15228e+07	1.45814e+06	3.19506e+06	1.13652e+06	4.35395e+06	4.69188e+06	4.4799e+06	-	-
Lasp008336	463.14	283.06	462.132	C26H22O8	[M+H]+	Butesuperin A	Flavonoids	Isoflavones	-	1	916886	1.39692e+06	651909	35127.6	63515.3	39064.3	45850.1	25894.1	30729	750562	849757	812379	1.61919e+06	1.03483e+06	1.76678e+06	932825	876099	872249	-	-
MWSmce676	149.05	59.01	150.053	C5H10O5	[M-H]-	D-Arabinose*	Others	Saccharides	10323-20-3	2	8.55669e+06	6.94171e+06	8.036e+06	1.9842e+07	1.72931e+07	1.73483e+07	1.18319e+07	1.07029e+07	1.11103e+07	6.82663e+06	7.77833e+06	8.47553e+06	5.62782e+06	5.90243e+06	7.84223e+06	1.18906e+07	1.2827e+07	1.23119e+07	C00216	ko00040,ko00053,ko00520,ko01100,ko01250
mws0520	224.09	136.08	223.084	C11H13NO4	[M+H]+	N-Acetyl-L-tyrosine	Amino acids and derivatives	Amino acids and derivatives	537-55-3	3	480854	673917	388716	195136	471381	221580	1.67157e+06	2.02578e+06	1.59445e+06	2.43882e+06	2.70062e+06	2.57335e+06	5.3248e+06	4.5175e+06	4.85179e+06	2.79519e+06	2.74206e+06	2.94939e+06	-	-
mws0715	263.1	145.06	264.111	C13H16N2O4	[M-H]-	Phenylacetyl-L-glutamine	Amino acids and derivatives	Amino acids and derivatives	28047-15-6	3	2.97115e+06	2.83322e+06	2.50701e+06	598171	1.09299e+06	978897	97853.6	102776	127851	1.41153e+06	1.4674e+06	1.58368e+06	853246	575002	573551	1.26172e+06	1.20371e+06	1.17032e+06	C04148	ko00360
Hmfn000531	175.02	87.01	176.032	C6H8O6	[M-H]-	L-Ascorbic acid (Vitamin C)	Others	Vitamin	50-81-7	3	1.5154e+06	924033	587175	2.85414e+06	3.25352e+06	1.83473e+06	8.21864e+06	1.0705e+06	6.76683e+06	1.67027e+07	2.54512e+06	1.13572e+07	2.21768e+06	1.20594e+07	2.89653e+07	1.55156e+07	1.65302e+07	1.66381e+07	C00072	ko00053,ko00480,ko01100,ko01110,ko01240
Lmjp005871	345.1	312.06	344.09	C18H16O7	[M+H]+	Penduletin (5,4'-Dihydroxy-3,6,7-trimethoxyflavone)	Flavonoids	Flavones	569-80-2	3	76724.7	58817.9	47791.6	5.27433e+07	6.43041e+07	7.38307e+07	6.18831e+07	6.5146e+07	5.53046e+07	2.28332e+07	2.62319e+07	2.15256e+07	1.77308e+07	1.59321e+07	1.32405e+07	2.46876e+07	2.60771e+07	2.42465e+07	-	-
Wbmp010544	699.35	699.35	698.341	C37H50N2O11	[M+H]+	10-Hydroxymethyllycaconitine	Alkaloids	Alkaloids	-	1	7.33381e+06	1.10116e+07	2.06732e+07	1.46096e+06	1.02672e+06	2.05174e+06	105196	224093	61102.6	220767	292426	356150	277669	231244	206186	7.36536e+06	7.86596e+06	7.36943e+06	-	-
Wmzn006169	471.35	407.33	472.355	C30H48O4	[M-H]-	3,16-Dihydroxyolean-12-en-28-oic acid (Echinocystic acid)	Terpenoids	Triterpene	510-30-5	3	9071.35	19631.5	5557.95	1756.08	3128.53	9	7908.95	5377.86	7795.63	3.35637e+06	4.01287e+06	3.40422e+06	5.80871e+06	4.99141e+06	4.32297e+06	2.64324e+06	2.80586e+06	2.84221e+06	C08942	ko00999,ko01100,ko01110
Zmzn003953	309.2	227.2	310.214	C18H30O4	[M-H]-	13(s)-hydroperoxy-(9z,11e,15z)-octadecatrienoic acid	Lipids	Free fatty acids	67597-26-6	2	6.50068e+06	8.92611e+06	4.80302e+06	576792	988417	619776	1.83144e+06	1.37388e+06	1.78433e+06	4.33296e+06	3.79001e+06	2.76695e+06	6.80727e+06	3.157e+06	4.46365e+06	3.18875e+06	3.16076e+06	3.38913e+06	C04785	ko00592,ko01100,ko01110
Wagp009079	403.14	373.09	402.132	C21H22O8	[M+H]+	3,5,6,7,8,4'-Hexamethoxyflavone	Flavonoids	Flavones	34170-18-8	3	9.04749e+06	9.50764e+06	8.87578e+06	9.29509e+06	8.62813e+06	8.92098e+06	9.29704e+06	8.75265e+06	9.37071e+06	9.41175e+06	9.64546e+06	9.41197e+06	8.98544e+06	9.49519e+06	9.21223e+06	8.98545e+06	9.64764e+06	9.09453e+06	-	-
Wmhn007355	285.04	241.05	286.048	C15H10O6	[M-H]-	Citreorosein	Quinones	Anthraquinone	481-73-2	1	4.85262e+06	1.21102e+07	1.05616e+07	112774	96018.7	169886	74166.4	803150	35891.7	7.86706e+06	8.89936e+06	6.05417e+06	5.05632e+06	2.68837e+06	2.1611e+06	3.24604e+06	3.49266e+06	3.45076e+06	C17810	-
Zmtn001661	315.11	153.02	316.116	C14H20O8	[M-H]-	Vanilloloside	Phenolic acids	Phenolic acids	74950-96-2	2	4.32861e+06	3.41657e+06	1.22336e+07	6.60458e+07	5.96402e+07	8.41175e+07	304336	201754	304433	437696	475050	600708	457664	308374	231502	1.61135e+07	1.66199e+07	1.7403e+07	-	-
Wbmn009545	569.34	487.34	570.356	C34H50O7	[M-H]-	2,3-Diacetoxy-18-hydroxyoleana-5,12-dien-28-oic acid	Terpenoids	Triterpene	-	3	780856	634093	166424	92750.8	81501.5	267971	72467.5	53419	74953.5	191757	357140	206107	2.67249e+06	1.80505e+06	2.43751e+06	1.48938e+06	1.53104e+06	1.60762e+06	-	-
mws0872	280.11	148.06	281.112	C11H15N5O4	[M-H]-	1-Methyladenosine	Nucleotides and derivatives	Nucleotides and derivatives	15763-06-1	2	26986.4	35429.7	9384.02	196551	233230	213417	200929	156701	191463	100793	114735	105653	99692.5	97218.5	82940.2	127861	120034	129013	C02494	-
pmn001384	515.12	353.09	516.127	C25H24O12	[M-H]-	Isochlorogenic acid C*	Phenolic acids	Phenolic acids	57378-72-0	2	690648	99393.4	973320	312199425	4.11611e+07	2.26698e+08	24040015	1.57961e+07	1.42262e+08	1.45874e+06	1.19665e+06	1710215	428566	680576	1.93525e+07	4.23173e+07	39375980	3.98503e+07	-	-
Lmpn007255	331.04	316.02	332.053	C16H12O8	[M-H]-	Patuletin (Quercetagetin-6-methyl ether)	Flavonoids	Flavonols	519-96-0	1	84846	9190.2	32273.6	30425.2	420622	56793.7	2.51156e+07	3.52084e+06	2.78998e+07	3.33318e+06	5.83254e+06	4.18328e+06	2.82217e+06	3.70904e+06	3.29466e+06	3.52977e+06	3.46231e+06	3.27151e+06	C10118	-
ML10198895	88.04	88.04	89.0477	C3H7NO2	[M-H]-	N-Methylglycine	Amino acids and derivatives	Amino acids and derivatives	107-97-1	3	16472.3	15178.1	8669.7	3469.7	8669.7	4769.7	11275.3	10838.1	19071	65024.7	71083.3	56785.3	91007.9	119556	85819.6	54346.1	55081.9	51140	C00213	ko00260,ko00330,ko01100
pme3193	116.04	74.02	117.043	C4H7NO3	[M-H]-	N-Acetyl-L-glycine	Amino acids and derivatives	Amino acids and derivatives	543-24-8	3	213852	332602	174353	232722	180983	125648	278747	550257	296417	1.58005e+06	752887	692851	962619	839047	779838	469526	491501	507836	-	-
mws0213	151.061	59.0139	152.069	C5H12O5	[M-H]-	Ribitol*	Others	Saccharides	488-81-3	1	3.71587e+06	3.87427e+06	1.45552e+06	1.1256e+06	1.59595e+06	1.36958e+06	3.78595e+06	3.46849e+06	3.92496e+06	2.95917e+06	2.92985e+06	2.96039e+06	3.04677e+06	3.0671e+06	3.47225e+06	3.95417e+06	4.08404e+06	3.77597e+06	C00474	ko00040,ko00740,ko01100
pme1292	167.03	123.05	168.042	C8H8O4	[M-H]-	Homogentisic acid	Phenolic acids	Phenolic acids	451-13-8	3	9	9	9	767334	179654	669302	1.99803e+07	1.11901e+07	1.90715e+07	1.28661e+07	9.16429e+06	8.89624e+06	4.59441e+06	9.44372e+06	5.28174e+06	5.1152e+06	5.31192e+06	4.91017e+06	C00544	ko00130,ko00350,ko01100,ko01240
Lcsn001170	231.13	130.09	232.142	C10H20N2O4	[M-H]-	Thr-Leu	Amino acids and derivatives	Amino acids and derivatives	50299-12-2	1	9.44905e+06	4.86187e+06	1.83765e+07	206929	1.61506e+06	224126	2.70972e+06	1.28091e+06	2.56321e+06	2.35966e+06	2.03712e+06	3.21857e+06	1.7605e+06	1.33333e+06	2.12002e+06	4.06091e+06	4.23522e+06	3.91556e+06	-	-
Wcfn004265	225.15	152.08	226.157	C13H22O3	[M-H]-	blumenol B	Others	Others	-	1	37024.8	39589.2	24267.7	45852.5	40679.2	49772.4	2.77561e+06	1.62963e+06	2.79051e+06	5.16925e+06	4.95658e+06	4.74246e+06	6.93309e+06	6.4724e+06	5.8028e+06	3.20248e+06	3.07156e+06	2.9605e+06	-	-
MWS4471	173.06	58.03	174.064	C6H10N2O4	[M-H]-	N-Alpha-Acetyl-L-Asparagine	Amino acids and derivatives	Amino acids and derivatives	4033-40-3	3	165169	260670	189500	122886	278791	57619.8	486108	305707	446347	863288	889994	813519	921734	893376	888494	598072	646761	628253	-	-
pmp000344	271.06	243.06	270.053	C15H10O5	[M+H]+	3',4',7-Trihydroxyflavone	Flavonoids	Flavones	2150-11-0	1	6.14925e+06	5.76612e+06	6.92485e+06	347564	359509	372521	462936	470563	442840	1.29185e+07	1.19884e+07	1.24229e+07	1.53083e+07	1.48131e+07	1.35019e+07	1.03188e+07	1.08735e+07	1.11537e+07	-	-
Wagp008369	405.12	375.07	404.111	C20H20O9	[M+H]+	5,3'-Dihydroxy-3,6,7,4',5'-Pentamethoxyflavone*	Flavonoids	Flavones	-	2	1.17752e+06	1.9134e+06	769902	16675	18953.3	5420	18498.2	9970.98	9768.57	601559	695060	1.03798e+06	712839	753154	801046	793211	743498	799555	-	-
Lhmp122225	253.22	81.07	252.209	C16H28O2	[M+H]+	dalodorin B	Terpenoids	Sesquiterpenoids	-	3	644147	700050	983480	279368	342016	436510	521653	393052	467939	1.2112e+06	640678	905765	903903	1.18648e+06	1.05443e+06	953394	908765	881934	-	-
Lmhp005784	425.21	177.05	424.2	C24H28N2O5	[M+H]+	p-Coumaroylferuloylcadaverine	Alkaloids	Phenolamine	-	3	1.02491e+06	1.63139e+06	2.13385e+06	81545.4	75852.6	80831.3	50150.9	33630.6	43170.7	667582	761812	652234	838203	885607	674844	822131	874790	813852	-	-
mws0183	153.02	109.03	154.027	C7H6O4	[M-H]-	3,4-Dihydroxybenzoic acid (Protocatechuic acid)*	Phenolic acids	Phenolic acids	99-50-3	1	612878	577496	291138	976190	1.37464e+06	1.18788e+06	6.31476e+06	6.94273e+06	7.89593e+06	1.71214e+06	1.23817e+06	1.99197e+06	821720	652069	921000	1.97244e+06	1.82608e+06	1.87306e+06	C00230	ko00400,ko01100,ko01110
MWS5238	165.09	91.05	164.084	C10H12O2	[M+H]+	4-Phenylbutyric acid	Organic acids	Organic acids	1821-12-1	3	4.50535e+06	1.77708e+06	1.36199e+06	351177	1.02866e+06	1.0815e+06	1.04468e+06	335432	1.07204e+06	1.25604e+06	1.65034e+06	1.42461e+06	1.59996e+06	1344138	1.32972e+06	2.23202e+06	2.07073e+06	2.1075e+06	-	-
Zmhn001036	433.11	271.06	434.121	C21H22O10	[M-H]-	Choerospondin	Flavonoids	Flavanones	81202-36-0	3	1.94317e+06	1.5327e+06	4.14058e+06	522467	226850	527384	40010	65020	67082.3	50015	206461	217986	193461	189905	164202	722572	687292	668428	-	-
Lmbn001467	158.08	116.07	159.089	C7H13NO3	[M-H]-	5-Acetamidopentanoic Acid	Organic acids	Organic acids	1072-10-2	1	1.39821e+06	2.05589e+06	905231	422976	5.08041e+06	350251	1.04234e+06	1.75283e+06	1.14949e+06	2.81373e+06	2.8231e+06	2.47743e+06	4.74626e+06	4.28679e+06	3.84063e+06	2.81382e+06	2.60551e+06	2.76051e+06	C03087	ko00310,ko01100
Wagp007374	209.15	191.14	208.146	C13H20O2	[M+H]+	3-Oxo-Alpha-Ionol	Others	Others	52210-15-8	1	116273	100995	109362	120901	186853	154046	1.39108e+07	4.05627e+06	1.56955e+07	8.19355e+06	6.75644e+06	8.14761e+06	3.33016e+06	3.32672e+06	3.35525e+06	4.57008e+06	4.26682e+06	4.27244e+06	-	-
Zmcn009787	469.33	439.32	470.34	C30H46O4	[M-H]-	23-Hydroxy-3-oxoolean-12-en-28-oic acid (Hederagonic acid)	Terpenoids	Triterpene	466-01-3	3	25756.5	51142.1	16032.5	5770.85	4691.2	1431.62	1027.44	8026.96	1819.1	7198.1	22384.9	13664.4	38130	31662.7	35031	22232.3	24053.6	23408.6	-	-
Hajp008429	301.11	181.05	300.1	C17H16O5	[M+H]+	4',5-dihydroxy-7-methoxy-6-methylfavanone	Flavonoids	Flavones	-	1	72915.6	27004.4	71543.6	4.51268e+07	5.38658e+07	6.66959e+07	4.52338e+07	4.99115e+07	4.15301e+07	1.34762e+07	1.34742e+07	1.36636e+07	7.36992e+06	8.42149e+06	8.06652e+06	1.7573e+07	1.90246e+07	1.82374e+07	-	-
Labp005432	517.13	269.08	516.127	C25H24O12	[M+H]+	Dalbergin malonyl glucoside	Lignans and Coumarins	Coumarins	-	1	4.95066e+07	1.6003e+07	2.12412e+07	80288.5	253224	76432.4	41995.7	14954	29445.7	63694.4	45413.4	18830.8	83081.6	44307.2	106385	4.90229e+06	5.28302e+06	4.98008e+06	-	-
Lmfn003035	325.09	145.03	326.1	C15H18O8	[M-H]-	6-O-p-Coumaroyl-β-D-glucose*	Phenolic acids	Phenolic acids	114297-65-3	2	1.90814e+06	2801814	1.89357e+06	9.13094e+06	1.67773e+06	1.8424e+06	40126.4	44591.7	32406.8	81937.9	65489.7	65833.9	38033.4	58009.4	68286.9	1.1986e+06	1.20239e+06	1.28537e+06	-	-
Wcsn009756	333.2	251.2	334.214	C20H30O4	[M-H]-	Epoxyeleganolactone	Others	Others	-	3	1.86528e+06	1.72283e+06	908191	401431	1.83478e+06	594427	2.71744e+06	2.60166e+06	2.8171e+06	5.98476e+06	6.31368e+06	6.16195e+06	7.69687e+06	5.27292e+06	6.15465e+06	3.93052e+06	4.001e+06	3.70467e+06	-	-
zjzp121605	233.15	187.15	232.146	C15H20O2	[M+H]+	(1S,4R)-7-hydroxycalamenen-3-one	Terpenoids	Sesquiterpenoids	-	3	62822.4	98999.2	74398.6	2.19628e+06	1.00738e+07	8.12934e+06	1.52523e+07	1.58213e+07	1.33342e+07	2.08459e+06	5.21305e+06	2.97891e+06	1.78388e+06	1.10716e+06	564333	4.09724e+06	4.15336e+06	3.85035e+06	-	-
Qatp009522	233.15	187.15	232.146	C15H20O2	[M+H]+	Dehydrosaussurea lactone	Terpenoids	Sesquiterpenoids	-	1	62822.4	98999.2	74398.6	2.19628e+06	1.00738e+07	8.12934e+06	1.52523e+07	1.58213e+07	1.33342e+07	2.08459e+06	5.21305e+06	2.97891e+06	1.78388e+06	1.10716e+06	564333	4.09724e+06	4.15336e+06	3.85035e+06	-	-
Wbwn006953	337.11	307.06	338.115	C20H18O5	[M-H]-	Cagayanone A	Lignans and Coumarins	Lignans	-	1	783732	414180	538929	4.38462e+06	4.58604e+06	4.46164e+06	8.49827e+06	1.73097e+07	1.16958e+07	2.09161e+06	1.48737e+06	3.31291e+06	633324	1.70054e+06	936078	2.6576e+06	2.86457e+06	2.83204e+06	-	-
Sahp008995	223.13	195.14	224.141	C13H20O3	[M-H]-	Sonnerstigmane D Aglycon	Terpenoids	Sesquiterpenoids	-	1	62226.4	55686.2	267679	166523	43636.6	59409	70256.9	45746	185564	263881	374516	281207	528033	872978	391995	257280	238181	252732	-	-
Yalp000545	130.09	84.08	129.079	C6H11NO2	[M+H]+	N-Methyl-L-proline	Amino acids and derivatives	Amino acids and derivatives	475-11-6	1	4.02071e+06	3.92754e+06	3.01857e+06	2.26014e+06	5.8488e+06	1.64459e+06	1.18058e+06	680635	666122	1.23575e+06	2.34984e+06	2.09647e+06	2.8241e+06	1.62582e+06	2.29913e+06	1.56776e+06	1.58934e+06	1.68905e+06	C22223	-
pmb1096	118.07	91.05	117.058	C8H7N	[M+H]+	Indole	Alkaloids	Plumerane	120-72-9	2	1.61834e+07	1.53716e+07	2.23365e+07	2.03726e+07	1.33325e+07	1.54631e+07	1.1253e+07	2.47786e+06	1.26225e+07	2.82709e+07	2.83221e+07	2.50813e+07	3.17643e+07	2.83577e+07	2.8199e+07	2.46658e+07	2.33564e+07	2.2828e+07	C00463	ko00380,ko00400,ko00402,ko00999,ko01100,ko01110
WaYn005746	339.12	309.08	340.131	C20H20O5	[M-H]-	(E)-3-[(2S,3S)-2-(4-hydroxy-3-methoxyphenyl)-7-methoxy-3-methyl-2,3-dihydro-1-benzofuran-5-yl]prop-2-enal	Phenolic acids	Phenolic acids	-	3	613827	543576	511124	2.04922e+06	1.29188e+06	2.02173e+06	1.096e+07	669009	1.12613e+07	4.29154e+06	3.79344e+06	6.34388e+06	2.36536e+06	3.00366e+06	3.28968e+06	2.51597e+06	2.67007e+06	2.71801e+06	-	-
mws4163	665.21	485.15	666.222	C24H42O21	[M-H]-	Nystose	Others	Saccharides	13133-07-8	3	636104	254151	171372	162651	235735	579840	516243	805458	387639	472628	543204	374365	265330	306987	402030	393806	393307	366849	-	-
Wcdp007360	496.34	184.07	495.332	C24H50NO7P	[M+H]+	LysoPC 16:0*	Lipids	LPC	17364-16-8	1	9.49324e+07	9.98679e+07	1.5285e+08	9.56718e+07	8.67745e+07	7.90846e+07	2.0045e+06	1.98284e+06	4.1122e+06	2.46203e+06	3.84637e+06	3.25052e+06	1.16279e+06	684500	2.74045e+06	4.32838e+07	4.65347e+07	4.63398e+07	-	-
Zbqn008291	473.36	473.36	474.371	C30H50O4	[M-H]-	3,13,15-Trihydroxyoleanane-12-one	Terpenoids	Triterpene	-	3	520057	1.59626e+06	2.35076e+06	5.38297e+06	5.33393e+06	5.22738e+06	5.19403e+06	5.81153e+06	5.9679e+06	2.08133e+06	2.66981e+06	2.51361e+06	2.04783e+06	3.43915e+06	1.42878e+06	3.49234e+06	3.59909e+06	3.78042e+06	-	-
Zbqp003444	217.16	84.04	216.147	C10H20N2O3	[M+H]+	(S)-4-amino-5-oxo-5-(pentylamino)pentanoic acid	Amino acids and derivatives	Amino acids and derivatives	-	2	764327	607470	1.51883e+06	3.14224e+06	5.10305e+06	3.33042e+06	1.4088e+06	308467	1.42622e+06	815104	901538	1.01308e+06	592284	488829	664968	1.32184e+06	1.27236e+06	1.21962e+06	-	-
Wmln000659	193.07	101.02	194.058	C10H10O4	[M-H]-	3-Methyl-4,8-dihydroxy-3,4-dihydroisocoumarin	Lignans and Coumarins	Coumarins	33788-22-6	2	173508	382960	340628	9	37487	8525.33	28536.1	18257	37129.9	50669.1	47775.3	22311.1	121006	84868.9	104111	130305	122570	132383	-	-
Zblp004832	257.08	137.02	256.074	C15H12O4	[M+H]+	7,4'-Dihydroxydihydroflavonoids	Flavonoids	Flavanones	-	1	8.68436e+06	9.86725e+06	3.61271e+06	202785	160045	156915	348441	281740	241576	8.20921e+06	1.15851e+07	9.84826e+06	1.20122e+07	1.07093e+07	1.58814e+07	9.98314e+06	1.00397e+07	9.33067e+06	-	-
MA10074217	144.05	115.04	145.053	C9H7NO	[M-H]-	4-Hydroxyquinoline	Alkaloids	Quinoline alkaloids	611-36-9	2	237204	429798	210919	766430	3.86015e+06	1.68896e+06	1.27345e+06	4.47077e+06	1.4323e+06	575648	579669	580502	555669	543960	622341	886403	912579	842397	C06343	-
pme0088	285.04	151	286.048	C15H10O6	[M-H]-	Luteolin (5,7,3',4'-Tetrahydroxyflavone)	Flavonoids	Flavones	491-70-3	2	498872	448858	934913	43676.7	34626.1	36253.3	127682	102192	145283	3.48524e+06	3.55188e+06	3.13426e+06	3.88714e+06	3.45886e+06	3.40376e+06	2.46971e+06	2.62516e+06	2.43515e+06	C01514	ko00941,ko00944,ko01100,ko01110
mws0154	173.05	93.03	174.053	C7H10O5	[M-H]-	Shikimic acid	Organic acids	Organic acids	138-59-0	3	132236	142102	151825	1.63078e+06	2.13228e+06	1.435e+06	1.50821e+06	1.28689e+06	1.51546e+06	672308	689806	849005	533485	505533	459192	983736	1.04238e+06	965401	C00493	ko00400,ko00996,ko00999,ko01100,ko01110,ko01230,ko01240
pmn001708	487.34	425.34	488.35	C30H48O5	[M-H]-	2,3,23-Trihydroxyurs-12-en-28-oic acid (Asiatic acid)	Terpenoids	Triterpene	464-92-6	3	41361.2	12742.7	5849.91	5468.94	6140.94	4288.11	9478.88	6893.08	5517.56	36245.9	51263.3	36176.9	67045	67850.7	54514	33033.9	35119.3	32569.2	C08617	-
Wasn000495	311.1	89.02	312.106	C11H20O10	[M-H]-	6-O-alpha-L-arabinopyranosyl-D-glucopyranose	Others	Saccharides	14116-69-9	2	2.34645e+06	1.63645e+06	2.5343e+06	1.59847e+07	1.17214e+07	1.39219e+07	162518	746652	1.16428e+06	787734	898608	810020	758174	765440	654558	1.04089e+06	1.04481e+06	1.1176e+06	C01625	-
pmb0998	364.07	152.06	363.058	C10H14N5O8P	[M+H]+	Guanosine 5'-monophosphate	Nucleotides and derivatives	Nucleotides and derivatives	85-32-5	3	49664.2	136666	72515.6	49301.8	141925	29899	38985	54536	35357.6	48490.3	38946	21899.2	15761.5	82495	13022.3	67309.1	63135.8	62526.7	C00144	ko00230,ko01100,ko01232
Zbqn006094	299.02	243.03	300.027	C15H8O7	[M-H]-	Pseudopurpurin(1,2,4-trihydroxy-3-carboxyanthraquinone)	Quinones	Anthraquinone	476-41-5	1	9	9	9	9	9	9	1.57433e+06	505158	2.50351e+06	9.03491e+06	3.57391e+06	3.88412e+06	1.33431e+06	783315	2.01033e+06	1.50094e+06	1.62765e+06	1.56775e+06	C10394	-
Lazn001573	213.08	150.03	214.084	C10H14O5	[M-H]-	Erythro-Guaiacylglycerol	Phenolic acids	Phenolic acids	-	3	34008	37071.6	34694.7	24610.8	23596.5	31871.6	128608	150277	140039	144640	117306	149749	98821.8	110600	101825	78788.5	81804.4	85420.9	-	-
MWSmce062	247.13	131.08	246.126	C15H18O3	[M+H]+	Xanthatin	Terpenoids	Sesquiterpenoids	26791-73-1	3	956067	892403	1.14485e+06	871580	5.74352e+06	3.29629e+06	8.62032e+06	1.64063e+06	1.17939e+06	1.24343e+06	899845	1.22e+06	981669	820409	1.23983e+06	1.62802e+06	1.72711e+06	1.59904e+06	C09601	-
Lmhp001670	231.17	72.08	230.163	C11H22N2O3	[M+H]+	L-Valyl-L-Leucine	Amino acids and derivatives	Amino acids and derivatives	3989-97-7	2	2.57849e+07	1.35619e+07	6.901e+07	604916	1.05433e+07	691984	1.39537e+07	6.07284e+06	1.38586e+07	1.78875e+07	1.68836e+07	2.13082e+07	1.01776e+07	10786247	1.2135e+07	2.13879e+07	2.01749e+07	2.18418e+07	-	-
MWSslk108	204.13	85.03	203.116	C9H17NO4	[M+H]+	O-Acetyl-L-carnitine	Alkaloids	Alkaloids	3040-38-8	3	3.74427e+07	3.28925e+07	3.20686e+07	1.71029e+07	2.34738e+07	20912637	4.57958e+06	5.69951e+06	1.03655e+07	1.56475e+06	1.31484e+06	1.58509e+06	1.03266e+06	944769	1.01158e+06	1.11021e+07	1.06824e+07	1.02303e+07	-	-
pmb0801	346.11	184.06	345.106	C14H19NO9	[M+H]+	4-Pyridoxic acid-O-glucoside	Others	Vitamin	-	3	1.32041e+06	1.20203e+06	1.33505e+06	249897	440412	474924	55760	83441.8	74613.1	94553.6	134541	27152	149357	104375	130106	329991	351341	356728	-	-
mws0091	463.09	300.03	464.096	C21H20O12	[M-H]-	Quercetin-3-O-glucoside (Isoquercitrin)	Flavonoids	Flavonols	482-35-9	1	2.63697e+06	1.25897e+06	1.14161e+07	1.47657e+06	7.92253e+06	1.07062e+07	1.00223e+06	358876	747625	466648	285972	486516	258423	142984	122493	3.11859e+06	2.98436e+06	2.87431e+06	C05623	ko00944,ko01100,ko01110
Zbqn004234	250.07	164.07	251.079	C12H13NO5	[M-H]-	N-(malonyl)phenylalanine	Amino acids and derivatives	Amino acids and derivatives	-	1	970191	874914	753150	58162.2	139995	54327.8	9	9	9	411537	397735	369507	541173	497359	543679	388498	416255	387629	-	-
pmb0789	332.13	152.07	331.127	C14H21NO8	[M+H]+	Pyridoxine-5'-O-glucoside	Others	Vitamin	-	3	5.5093e+06	4.04702e+06	8.81544e+06	2.92509e+06	3.07133e+06	2.70332e+06	284934	267124	254699	94105.8	69697.9	94888.5	67478.8	60271.1	81044.4	1.29534e+06	1.3033e+06	1.20945e+06	C03996	-
pmb3068	337.09	163.04	338.1	C16H18O8	[M-H]-	1-O-p-Coumaroylquinic acid*	Phenolic acids	Phenolic acids	-	2	234864	307092	1.80727e+06	3.25277e+06	1.76381e+06	3.97987e+06	1.77372e+06	1.08892e+06	1.81586e+06	2.03311e+06	1.19174e+06	644237	94018.4	131429	409430	1.14107e+06	1.23353e+06	1.21581e+06	-	-
Hmmn002544	355.1	193.05	356.111	C16H20O9	[M-H]-	Ferulic acid-4-O-glucoside	Phenolic acids	Phenolic acids	117405-51-3	3	128749	124702	217844	1.59046e+06	320393	1.55437e+06	238399	66685	279772	144502	164616	167632	137110	95331.5	235541	317398	320696	342130	-	-
Zmhp004065	345.1	330.07	344.09	C18H16O7	[M+H]+	7,8-Dihydroxy-5,6,4'-trimethoxyflavone*	Flavonoids	Flavones	-	2	175421	130372	67149.3	6.70296e+07	7.41375e+07	8.48272e+07	7.21757e+07	7.50315e+07	6.79525e+07	2.72679e+07	3.10474e+07	2.91306e+07	2.21941e+07	1.92286e+07	1.75105e+07	3.06587e+07	3.31896e+07	3.13591e+07	-	-
mws0924	145.05	101.06	146.058	C6H10O4	[M-H]-	2-Methylglutaric acid*	Organic acids	Organic acids	617-62-9	3	2.63962e+06	2.84103e+06	1.83627e+06	556179	648919	563151	1.30456e+06	1.93504e+06	3.29525e+06	3.68292e+06	4.25243e+06	4.0108e+06	4.78849e+06	4.89289e+06	4.23608e+06	3.4072e+06	3.1814e+06	3.16912e+06	-	-
Waln011704	580.36	281.25	581.369	C28H56NO9P	[M-H]-	1-(2,3-dihydroxypropoxy)-3-(((2-(dimethylamino)ethoxy)(hydroxy)phosphoryl)oxy)propan-2-yl (Z)-14-Octadecenoic Acid	Lipids	LPE	-	1	102962	102326	88130.7	170021	144123	121618	6058.89	6993.42	8841.4	13529.3	9793.72	12008.5	16041.6	11689.1	43568.2	55919.9	57045.2	60495.9	-	-
MWS2910	242.11	126.07	241.106	C10H15N3O4	[M+H]+	5-Methyl-2'-Deoxycytidine	Nucleotides and derivatives	Nucleotides and derivatives	838-07-3	3	473876	345138	237008	69559.5	119842	85677.1	91826	258420	157599	2.50063e+06	2.16711e+06	2.13109e+06	2.20479e+06	2.71796e+06	2.66356e+06	1.63485e+06	1.57796e+06	1.71304e+06	C03592	-
pme2954	303.05	137.02	302.043	C15H10O7	[M+H]+	Quercetin	Flavonoids	Flavonols	117-39-5	1	427758	282845	195140	245215	107444	489175	9.66769e+06	1.14449e+06	1.45795e+07	1.66998e+07	7.41416e+06	7.28131e+06	1.99539e+06	1.58825e+06	4.32167e+06	3.48562e+06	3.54754e+06	3.76883e+06	C00389	ko00941,ko00944,ko01100,ko01110
mws1090	259.02	96.97	260.03	C6H13O9P	[M-H]-	D-Glucose-1-phosphate*	Others	Saccharides	59-56-3	3	423929	504652	448809	620649	390686	849195	666560	53892.9	214031	355309	289375	408954	473978	465643	543900	567069	606381	612490	C00103	ko00010,ko00040,ko00052,ko00500,ko00520,ko00523,ko00561,ko01100,ko01110,ko01240,ko01250
pme0513	151.06	59.01	152.069	C5H12O5	[M-H]-	Xylitol*	Others	Saccharides	87-99-0	1	3.0092e+06	3.61869e+06	1.34929e+06	884214	1.3192e+06	1.17451e+06	3.55759e+06	2.98834e+06	3.3244e+06	2.52036e+06	2.59193e+06	2.69691e+06	3.12257e+06	2.67042e+06	3.17623e+06	3.55011e+06	3.75494e+06	3.46571e+06	C00379	ko00040,ko01100,ko02010
pmn001686	287.22	241.22	288.23	C16H32O4	[M-H]-	10,16-Dihydroxypalmitic acid	Lipids	Free fatty acids	3233-90-7	2	206980	208156	221269	79765.7	98723.7	120085	267333	174885	253907	425080	423360	418276	456854	505048	425837	343105	349366	371108	C08285	ko00073
mws0024	169.01	125.02	170.022	C7H6O5	[M-H]-	Gallic acid	Phenolic acids	Phenolic acids	149-91-7	3	9	86570.1	123851	657515	1.34951e+06	481851	4.25232e+06	1.46989e+06	4.77603e+06	3.76248e+06	3.06745e+06	4.90416e+06	1.75642e+06	1.37093e+06	1.82056e+06	2.46822e+06	2.36993e+06	2.27135e+06	C01424	ko00999
MWS5083	455.1	96.97	456.105	C17H21N4O9P	[M-H]-	Flavin Single Nucleotide(FMN)	Nucleotides and derivatives	Nucleotides and derivatives	6184-17-4	3	119487	83645	98534.3	1.20077e+06	1.7275e+06	1.88333e+06	1.27905e+06	1.17587e+06	1.32057e+06	647430	651824	533503	457597	351662	383490	714203	726001	772174	C00061	ko00190,ko00740,ko01100,ko01110,ko01240
Lmsn003588	297.08	282.05	298.084	C17H14O5	[M-H]-	Pterocarpine	Flavonoids	Isoflavones	524-97-0	3	2.07857e+07	2.02446e+07	1.65017e+07	148060	89892.6	176591	249612	257153	247283	2.74723e+07	3.33145e+07	3.20275e+07	3.36357e+07	3.34312e+07	4.23824e+07	2.33493e+07	2.52947e+07	2.4849e+07	-	-
Zmmp002946	295.13	120.08	294.122	C14H18N2O5	[M+H]+	(3-(carboxyamino)-2-methylpropanoyl)phenylalanine	Amino acids and derivatives	Amino acids and derivatives	-	1	3.01127e+07	3.58297e+07	2.11292e+07	1.66111e+06	7.80414e+06	2.14901e+06	902344	99712.1	742825	5.48903e+06	4.5065e+06	6.23526e+06	9.73724e+06	8.12523e+06	1.15828e+07	1.62938e+07	1.76041e+07	1.65235e+07	-	-
Sayn009123	509.12	373.1	510.132	C30H22O8	[M-H]-	pauferrol B	Terpenoids	Ditepenoids	-	2	3.23178e+06	1.82392e+06	1.0357e+06	48277.3	14525.1	9725.68	48712	32297	36831.8	1.43443e+06	1.65844e+06	1.78749e+06	5.89708e+06	6.23196e+06	8.44243e+06	3.91003e+06	4.07336e+06	3.74778e+06	-	-
HX1227	219.17	149.1	218.167	C15H22O	[M+H]+	Selina-3,7(11)-dien-8-one	Terpenoids	Monoterpenoids	-	1	362442	292254	280586	2.52731e+07	1.93136e+07	1.66727e+07	1.86194e+07	1.90473e+07	2.17926e+07	1.68214e+07	9.23698e+06	8.22167e+06	5.49206e+06	1.29653e+07	4.46905e+06	9.32692e+06	8.94843e+06	8.58022e+06	-	-
Zmjn002583	167.03	123.05	168.042	C8H8O4	[M-H]-	2',4',6'-Trihydroxyacetophenone	Phenolic acids	Phenolic acids	480-66-0	3	48342.9	60173.9	25005	168855	1.01128e+06	66959.3	84393.6	210070	203423	9	9	9	97898.2	107761	50657.3	88979.9	88694	95415	C21895	-
MA10014775	109.03	81.03	110.037	C6H6O2	[M-H]-	Hydroquinone	Phenolic acids	Phenolic acids	123-31-9	2	121633	94882.9	54757.6	218739	258487	237984	1.2252e+06	1.2769e+06	1.54892e+06	309676	277265	414707	176924	194583	226166	426754	392906	405878	C00530	ko00350,ko01100
pme0120	118.09	101.06	117.079	C5H11NO2	[M+H]+	5-Aminovaleric acid	Organic acids	Organic acids	660-88-8	3	135030	179874	121777	35771.4	189701	76622.9	149055	113261	131825	73172.5	323896	233848	518069	407289	449664	256354	258452	276460	C00431	ko00310,ko00330,ko00470,ko01100
Lahp002608	188.07	118.07	187.063	C11H9NO2	[M+H]+	3,5-Dihydro-2H-Furo[3,2-C]Quinolin-4-One	Alkaloids	Quinoline alkaloids	-	1	3.36538e+06	2.78066e+06	4.83531e+06	4.62448e+06	2.50749e+06	3.31318e+06	2.55847e+06	56703.4	2.77221e+06	7.89254e+06	8.29549e+06	8.25245e+06	9.68655e+06	9.48308e+06	9.20071e+06	6.61297e+06	6.13922e+06	6.60226e+06	-	-
Zmxp005470	579.13	331.08	578.127	C26H26O15	[M+H]+	Tricin-7-O-(6''-O-malonyl)glucoside	Flavonoids	Flavones	-	1	34245675	4.57609e+07	5.05373e+07	1.44245e+07	1.88676e+07	1.96061e+07	172855	248442	392210	254301	217298	310489	182365	203348	124205	9.90544e+06	1.06199e+07	1.06975e+07	-	-
MWS1844	203.14	129.07	202.136	C14H18O	[M+H]+	2-Pentyl-3-phenyl-2-propenal	Others	Aldehyde compounds	122-40-7	3	866169	831652	988872	824289	973492	1.02959e+06	994201	941705	886860	901151	887711	965898	885188	927007	935701	789339	726298	766586	C12288	-
pme0368	579.17	271.06	578.164	C27H30O14	[M+H]+	Apigenin-7-O-rutinoside (Isorhoifolin)*	Flavonoids	Flavones	552-57-8	3	6.76431e+06	5.27844e+06	2.14298e+06	58350	26675	348765	10005	31675	17922.4	216431	172244	168440	135070	106710	182203	1.42944e+06	1.45435e+06	1.34166e+06	-	-
mws0048	431.1	311.05	432.106	C21H20O10	[M-H]-	Apigenin-8-C-Glucoside (Vitexin)*	Flavonoids	Flavones	3681-93-4	1	5.46772e+06	2.75502e+06	1.01854e+06	72400.3	203901	367563	803400	606930	659139	1.50219e+07	7.44837e+06	1.27796e+07	6.2819e+06	1.10957e+07	7.51746e+06	4.39035e+06	4.29307e+06	4.65515e+06	C01460	ko00941,ko00944
mws1073	595.17	457.13	594.159	C27H30O15	[M+H]+	Apigenin-6,8-di-C-glucoside (Vicenin-2)	Flavonoids	Flavones	23666-13-9	1	5.80151e+06	4.10859e+06	3.447e+06	646573	1.41358e+06	2.92987e+06	3.8613e+06	2.88105e+06	3.52665e+06	1.19997e+07	1.22551e+07	7.80133e+06	9.23258e+06	7.98975e+06	1.04609e+07	5.57855e+06	6.06352e+06	5.89755e+06	C10195	-
MWS201447	237.12	120.09	236.116	C12H16N2O3	[M+H]+	Phe-Ala	Amino acids and derivatives	Amino acids and derivatives	3918-87-4	2	394199	282462	268753	73184.8	111459	62821.2	141396	79964.4	176690	565589	510071	404753	847771	547863	609971	405361	396482	373344	-	-
Lmhn204620	425.09	277.03	426.095	C22H18O9	[M-H]-	Bis(p-Coumaroyl)malic acid	Phenolic acids	Phenolic acids	-	3	140618	117617	123616	108664	145912	108804	22954.5	61178.5	34805.5	49818.6	45580.1	52026.3	57895	63956.4	38067.4	81491.4	79525.6	86293.5	-	-
Cmpn007831	265.14	221.15	266.152	C15H22O4	[M-H]-	Arsanin	Terpenoids	Sesquiterpenoids	41135-04-0	2	51077.2	58860.5	21765.2	246550	447859	125359	529644	454062	494611	359059	275851	423231	241477	182045	191892	178612	193708	190373	-	-
Lcsn000415	267.07	59.01	268.079	C9H16O9	[M-H]-	Keto-Deoxy-Nonulonic acid	Organic acids	Organic acids	153666-19-4	1	1.17222e+06	1.1313e+06	1.38953e+06	2.05386e+06	1.86305e+06	1.98877e+06	106645	63825.5	77837.3	43800.8	105628	59099	35551.4	13340	40762.9	454028	453670	421333	C20934	ko00520,ko01100,ko01250
Wbwp013975	481.29	355.22	480.288	C30H40O5	[M+H]+	lancilactone A	Terpenoids	Terpene	218915-15-2	3	10729.1	14434.4	8027.26	115718	395253	197404	186441	1.8982e+06	177186	70674.6	127005	276025	115030	210415	132828	376723	360289	346138	-	-
Wcdn001824	315.07	153.02	316.079	C13H16O9	[M-H]-	2-Hydroxy-5-[3,4,5-Trihydroxy-6-(Hydroxymethyl)Oxan-2-Yl]Oxybenzoic Acid	Others	Others	-	3	4.74225e+06	4.40783e+06	1.24974e+07	5.98017e+07	5.56261e+07	7.74451e+07	254887	193087	251993	387271	429517	551594	433357	172128	288538	1.61118e+07	1.74249e+07	1.72724e+07	-	-
pmc1990	299.09	119.05	300.1	C17H16O5	[M-H]-	4'-Hydroxy-5,7-dimethoxyflavanone	Flavonoids	Flavanones	-	3	28002	46814.7	80130.7	7.55517e+07	8.02178e+07	1.05229e+08	7.62563e+07	7.15251e+07	5.62841e+07	1.98616e+07	2.05312e+07	1.99557e+07	1.0488e+07	1.2158e+07	1.11815e+07	2.55132e+07	2.77244e+07	2.70859e+07	-	-
Wcgn012724	281.17	199.17	282.183	C16H26O4	[M-H]-	6-Hydroxyphomodiol	Others	Others	-	1	1.28822e+07	1.54962e+07	1.29815e+07	1.05309e+07	1.76028e+07	1.23185e+07	2.18158e+07	1.86392e+07	1.97568e+07	4.84463e+07	5.23039e+07	4.79325e+07	5.94006e+07	5.23994e+07	4.55008e+07	3.67895e+07	3.6679e+07	3.95083e+07	-	-
Li512113	451.09	391.04	452.096	C20H20O12	[M-H]-	Maleoyl-caffeoylquinic acid	Phenolic acids	Phenolic acids	-	3	254974	206353	212525	1.00399e+06	641175	986359	1.08436e+06	942444	969104	886717	811278	770234	442973	538514	672418	673136	632933	620946	-	-
Zbdp007428	313.07	268.03	312.063	C17H12O6	[M+H]+	3-Methoxy-7-hydroxy-3',4'-methylenedioxyflavone	Flavonoids	Other Flavonoids	-	2	977921	1.07986e+06	897936	18340	8709.8	15150.2	27060.1	55015	35290.3	1.48672e+06	1.75766e+06	1.27632e+06	2.99901e+06	2.02114e+06	2.55217e+06	1.34741e+06	1.29923e+06	1.4141e+06	-	-
Zahp013600	282.28	69.07	281.272	C18H35NO	[M+H]+	Octadec-2-enamide	Alkaloids	Alkaloids	-	3	193892	73987.5	121041	72136.1	661059	393958	216863	304082	378717	146215	174624	190653	226038	156588	270285	5.40332e+06	5.04471e+06	5.00386e+06	-	-
pme0026	147.11	84.08	146.106	C6H14N2O2	[M+H]+	L-Lysine	Amino acids and derivatives	Amino acids and derivatives	56-87-1	1	356404	244492	282616	36096.8	65308.9	11633.5	142040	20552.5	138882	710930	647679	664163	1.05456e+06	986483	925003	606037	571982	622209	C00047	ko00300,ko00310,ko00470,ko00780,ko00960,ko00970,ko01100,ko01110,ko01210,ko01230,ko02010
Zmgn000173	149.05	75.01	150.053	C5H10O5	[M-H]-	D-Ribose	Others	Saccharides	50-69-1	2	2.59218e+06	2.9405e+06	2.0858e+06	1.46906e+06	1.56429e+06	1.17653e+06	575268	517728	546590	886521	873650	830524	889198	958838	1.08988e+06	1.51602e+06	1.46724e+06	1.39215e+06	C00121	ko00030,ko01100,ko02010
MWS1776	109.06	65.04	108.058	C7H8O	[M+H]+	m-Cresol	Phenolic acids	Phenolic acids	108-39-4	3	177733	95621.2	201489	417221	496992	89799.4	901012	516801	996010	678235	603638	678771	540353	548719	443645	484206	526694	513565	C01467	-
Zmzn000078	168.99	78.96	169.998	C3H7O6P	[M-H]-	Dihydroxyacetone phosphate	Others	Saccharides	57-04-5	3	14087.4	13087.5	12199.1	10090.2	7535.9	9444.28	7672.61	9784.92	37325.1	12199.5	25911.3	56527	11430.2	37283.2	9345.76	35330.7	34426	32473.8	C00111	ko00010,ko00040,ko00051,ko00052,ko00561,ko00562,ko00564,ko00630,ko00640,ko00710,ko00760,ko01100,ko01110,ko01200,ko01230
Hmjn008136	469.33	469.33	470.34	C30H46O4	[M-H]-	2,3-Dihydroxyoleana-11,13(18)-dien-28-oic acid (Camaldulenic acid)	Terpenoids	Triterpene	71850-15-2	2	411083	639869	191279	498614	417606	472807	343169	308283	959364	1.92524e+06	1.0365e+06	315071	2.92868e+06	2.68844e+06	2.52035e+06	1.44427e+06	1.45964e+06	1.34758e+06	-	-
MWS2673	339.25	121.1	338.246	C20H34O4	[M+H]+	5,6-DiHETrE[(±)5,6-dihydroxy-8Z,11Z,14Z-eicosatrienoic acid]	Lipids	Free fatty acids	213382-49-1	3	298761	138276	409224	199249	677917	292523	66157.7	156335	82767.9	130697	84041	45353.1	151285	40615	74321.9	260895	273889	251514	C14772	ko00590,ko01100
pme0001	609.18	301.07	610.19	C28H34O15	[M-H]-	Hesperetin-7-O-neohesperidoside(Neohesperidin)*	Flavonoids	Flavanones	13241-33-3	3	437356	341687	380410	1.47174e+06	1.61211e+06	1.48849e+06	1.87151e+06	1.80582e+06	1.71968e+06	2.02181e+06	1.73645e+06	1.91111e+06	1.45997e+06	1.3005e+06	1.88707e+06	1.15279e+06	1.13279e+06	1.06175e+06	C09806	ko00941
Lmrn003000	165.06	103.06	166.063	C9H10O3	[M-H]-	2-Hydroxy-3-phenylpropanoic acid	Phenolic acids	Phenolic acids	7326-19-4	1	63998.3	102732	19156.6	62896.9	294138	88776.7	2.21868e+06	3.52057e+06	2.18338e+06	2.67501e+06	3.00781e+06	2.50718e+06	2.70728e+06	2.46641e+06	2.50413e+06	1.63468e+06	1.71513e+06	1.78128e+06	C05607	ko00360,ko00960,ko01100,ko01110
MWS201400	304.17	188.07	303.158	C16H21N3O3	[M+H]+	Val-Trp	Amino acids and derivatives	Amino acids and derivatives	24587-37-9	1	6.09682e+06	4.09576e+06	1.32816e+07	110719	1.85973e+06	174656	7.41043e+06	1.50868e+06	8.20563e+06	2.04462e+07	2.1669e+07	3.12757e+07	1.93605e+07	1.53073e+07	2.13396e+07	2.01085e+07	2.18214e+07	2.14961e+07	-	-
Zaxn005611	315.2	315.2	316.24	C21H32O2	[M-H]-	Methyl abieta	Terpenoids	Ditepenoids	-	2	1.08426e+06	503343	1.40015e+06	7.18986e+07	2.80805e+07	3.66009e+07	2.40803e+07	2.34405e+07	2.48239e+07	1.54368e+07	9.24382e+06	1.36776e+07	3.19982e+06	9.49249e+06	7.1561e+06	1.36439e+07	1.44542e+07	1.32964e+07	-	-
Hmlp005443	255.07	137.02	254.058	C15H10O4	[M+H]+	6,7-Dihydroxyflavone	Flavonoids	Flavones	38183-04-9	1	1.70885e+07	2.01508e+07	6.27472e+06	222523	231211	204003	366923	413726	352934	1.68335e+07	2.07301e+07	1.83989e+07	3.09418e+07	2.68483e+07	3.43777e+07	1.8886e+07	1.84458e+07	2.00432e+07	-	-
Wbtn007637	301.07	256.04	302.079	C16H14O6	[M-H]-	1-hydroxy-3,6,7-trimethoxyxanthen-9-one	Flavonoids	Other Flavonoids	-	2	42647.7	44432.8	57457.6	34101.4	27293.1	16964.8	19560.6	18700.1	33945.2	378381	344384	377453	587478	500800	449738	306604	300935	326536	-	-
mws1417	160.04	116.05	161.048	C9H7NO2	[M-H]-	Indole-3-carboxylic acid*	Alkaloids	Plumerane	771-50-6	1	5.09085e+06	7.36671e+06	2.55622e+06	1.39565e+07	2.85198e+07	1.86602e+07	2.08485e+07	1.99227e+07	1.94997e+07	1.07554e+07	1.30227e+07	1.18527e+07	1.63798e+07	1.53002e+07	13390289	1.03552e+07	1.12637e+07	1.06418e+07	C19837	-
Zmdp005767	517.13	269.09	516.127	C25H24O12	[M+H]+	Formononetin-7-O-(6''-Malonyl)glucoside	Flavonoids	Isoflavones	-	1	5.56921e+07	1.66093e+07	2.39101e+07	111110	270656	106879	59887.4	59052.6	33653.2	108138	87048.6	41350.5	50015	39740.5	137527	5.26093e+06	5.64389e+06	5.70139e+06	C16222	ko00943
mws0854	163.061	59.0139	164.069	C6H12O5	[M-H]-	Rhamnose*	Others	Saccharides	3615-41-6	3	774050	834585	474291	327339	610516	307704	1.26425e+06	1.89269e+06	794249	1.31089e+06	1.26337e+06	1.00683e+06	1.15271e+06	1.4315e+06	1.16052e+06	1.12223e+06	1.16076e+06	1.06428e+06	C00507	ko00051,ko01100
Wcfp004977	291.1	245.09	290.09	C14H14N2O5	[M+H]+	Malonyltryptophan	Organic acids	Organic acids	-	1	4.74869e+06	8.54259e+06	5.92647e+06	157247	169235	849195	190308	175594	221845	469870	579585	564978	489515	198635	525827	1.77358e+06	1.75906e+06	1.90246e+06	-	-
mws1505	283.1	135.04	284.105	C17H16O4	[M-H]-	Phenethyl caffeate	Phenolic acids	Phenolic acids	104594-70-9	3	81996.9	106805	88495.4	839502	300919	447564	917085	285484	510565	194900	136591	421663	105508	209587	96492.2	245441	236041	224920	C10484	-
Wbmp007967	365.27	365.27	364.261	C22H36O4	[M+H]+	Vitexifolin F	Terpenoids	Ditepenoids	-	3	1.18536e+07	9.41488e+06	6.93997e+06	2.73175e+06	2.90515e+06	4.39232e+06	3.82717e+06	5.80698e+06	3.15943e+06	8.3006e+06	8.88274e+06	7.15741e+06	1.08523e+07	9.83259e+06	8.66553e+06	7.26775e+06	7.46706e+06	6.8512e+06	-	-
Lasp006294	533.13	285.08	532.122	C25H24O13	[M+H]+	Malonyltrifolirhizin	Flavonoids	Other Flavonoids	-	3	539822	224832	422938	792456	1627585	697853	25638.4	37825.2	208490	48622.7	46976.5	42992.3	27875.2	23031.1	44528.8	214919	229098	210947	-	-
mws0046	579.17	271.06	580.179	C27H32O14	[M-H]-	Naringenin-7-O-Neohesperidoside(Naringin)*	Flavonoids	Flavanones	10236-47-2	3	435196	412388	29701.7	455622	504351	536439	634865	730381	594313	710566	696157	770719	577400	729846	690631	578247	556229	606867	C09789	ko00941,ko01100
Zmpp001726	184.1	124.07	183.089	C9H13NO3	[M+H]+	Epinephrine	Alkaloids	Alkaloids	51-43-4	3	1.74938e+06	1.80377e+06	1.61087e+06	790471	1.39986e+06	911857	912083	854189	723278	1.27949e+06	1.38183e+06	1.26207e+06	1.5816e+06	1.46219e+06	1.41274e+06	1.36882e+06	1.35976e+06	1.26377e+06	C00788	ko00350,ko01100
Qmjp080402	277.22	235.18	276.209	C18H28O2	[M+H]+	(11E)-(4S,5R,9S,10S)-15,16-Bisnor-13-oxo-8(17),11-labdadien-19-ol	Terpenoids	Sesquiterpenoids	-	3	4.22606e+06	3.00053e+06	5.00131e+06	423670	983054	895389	1.43589e+06	1.01922e+06	1.44657e+06	5.69412e+06	4.95634e+06	4.95047e+06	5.41622e+06	5.38405e+06	5.55726e+06	5.01217e+06	4.69419e+06	4.6185e+06	-	-
pmb2640	199.17	199.17	200.178	C12H24O2	[M-H]-	Dodecanoic acid (Lauric acid)	Lipids	Free fatty acids	143-07-7	3	1.4589e+06	1.76385e+06	1.3396e+06	834932	1.48075e+06	1.0364e+06	1.9046e+06	1.97773e+06	1.78724e+06	5.48175e+06	5.55551e+06	4.98058e+06	6.88615e+06	5.60694e+06	4.93137e+06	3.72456e+06	3.68036e+06	3.43092e+06	C02679	ko00061,ko01100,ko01110
Lmdn011166	313.18	255.1	314.188	C20H26O3	[M-H]-	3,4,4'-Trihydroxy-5,5'-diisopropyl-2,2'-dimethylbiphenyl	Others	Others	123132-69-4	1	3.10587e+06	2.22829e+06	4.69804e+06	138598	984684	267485	397573	681440	345317	1.40235e+06	1.01822e+06	1.39423e+06	986329	944986	1.33486e+06	1.73182e+06	1.58671e+06	1.67404e+06	-	-
MWSmce371	247.13	203.14	248.141	C15H20O3	[M-H]-	Atractylenolide Ⅲ	Terpenoids	Sesquiterpenoids	73030-71-4	3	29739	17838.3	29861.6	347876	413052	277674	160967	272387	201585	58033.6	67274.2	61317.6	40265.9	43620.9	21350.8	96957.9	98767.2	105345	C17887	-
Hagn007569	401.18	59.01	402.132	C21H22O8	[M-H]-	5,6,7,3',4',5'-hexanmethoxyflavone	Flavonoids	Flavones	-	3	32551.8	27208	9806.45	24933.6	13174.6	15898.1	110963	113470	126029	121112	86856.3	134364	108617	121876	119607	70167	75654.4	75939	-	-
pmp000011	365.2	227.11	364.189	C20H28O6	[M+H]+	Argyinolide H	Terpenoids	Sesquiterpenoids	-	3	39103.6	142801	287321	18172.5	10957.6	23205.8	52946.4	13715.9	12683.8	30741.4	143863	118857	102314	169338	70301.1	120140	116698	110099	-	-
Lhmp122202	285.08	270.05	284.068	C16H12O5	[M+H]+	stevenin	Lignans and Coumarins	Coumarins	36286-69-8	2	1.40301e+07	1.38996e+07	9.57953e+06	162289	99411.4	121367	140836	168465	98685.8	1.20441e+07	1.2131e+07	1.22853e+07	2.64783e+07	2.08615e+07	2.66498e+07	1.38831e+07	1.32717e+07	1.4498e+07	-	-
pmf0512	88	44.01	89.0113	C2H3NO3	[M-H]-	Oxamic acid	Amino acids and derivatives	Amino acids and derivatives	471-47-6	3	176651	112889	86063.2	244646	255898	410729	30819.9	45620.5	28340	28340	11670	26675	25005	36675	20029.1	67824.2	63837.5	62282.8	C01444	ko00230,ko01100
Lmcp007240	343.12	313.08	342.11	C19H18O6	[M+H]+	5,6,7,4'-Tetramethoxyflavone*	Flavonoids	Flavones	1168-42-9	3	938221	1.04454e+06	967623	955983	865515	900817	933981	873503	977049	1.07782e+06	1.04394e+06	1.01182e+06	1.19213e+06	1.3702e+06	1.21041e+06	962443	1.02155e+06	1.05078e+06	C14472	-
Zmdn001564	293.11	164.07	294.122	C14H18N2O5	[M-H]-	γ-Glutamylphenylalanine	Amino acids and derivatives	Amino acids and derivatives	7432-24-8	1	3.60536e+06	4.03525e+06	2.46114e+06	239949	691071	207009	103999	30388.2	93007.5	598282	580725	659343	1.01244e+06	928755	1.42321e+06	1.77735e+06	1.93946e+06	1.89107e+06	-	-
ZbWn003804	297.14	96.96	298.145	C12H26O6S	[M-H]-	8-(methoxymethoxy)decyl hydrogen sulfate	Others	Others	-	2	1.15073e+07	1.50226e+07	1.05516e+07	780052	1.047e+06	985592	1.09052e+06	1.30235e+06	1.18856e+06	5.48201e+06	5.28493e+06	5.32613e+06	8.42599e+06	7.16351e+06	7.0485e+06	5.16783e+06	5.29152e+06	4.85041e+06	-	-
Lmtn002565	329.11	167.03	330.095	C14H18O9	[M-H]-	1-O-Vanilloyl-D-Glucose	Phenolic acids	Phenolic acids	-	3	1.04308e+06	805094	2.74264e+06	42841905	3.17614e+07	1.7541e+07	8.45136e+06	5.13327e+06	6.59078e+06	457675	398586	743034	52927.2	220175	107253	4.79685e+06	5.2442e+06	5.00914e+06	C20470	-
Smbp005175	345.09	330.07	344.09	C18H16O7	[M+H]+	Rivularin*	Flavonoids	Flavones	70028-59-0	2	75340.6	38556.8	106782	3.44359e+07	3.81268e+07	4.86077e+07	3.98929e+07	4.35414e+07	3.43474e+07	1.55221e+07	1.73237e+07	1.54084e+07	9.96056e+06	1.04709e+07	9.0368e+06	1.5169e+07	1.65824e+07	1.5809e+07	-	-
Wcsn010287	359.22	277.22	360.23	C22H32O4	[M-H]-	2,10,14-Trimethyl-6-methylene-16-acetoxyhexadeca-2,10,14-triene-4,7-dione	Others	Others	-	3	3.31387e+07	3.34325e+07	2.88763e+07	1.68885e+07	2.36068e+07	2.31534e+07	3.18352e+07	2.8822e+07	2.8586e+07	4.74987e+07	4.47221e+07	4.41321e+07	5.05604e+07	4.16102e+07	4.1518e+07	4.1831e+07	3.95996e+07	3.83035e+07	-	-
MWS1882	132.03	88.0403	133.037	C4H7NO4	[M-H]-	Iminodiacetic acid	Organic acids	Organic acids	142-73-4	3	496417	460358	438055	44657.3	392461	53725.5	185150	36447.8	178682	1.18565e+06	1.14705e+06	1.17123e+06	1.18979e+06	1.443e+06	1.4198e+06	1.06974e+06	984812	998737	C19911	-
pme2362	151.04	107.05	152.047	C8H8O3	[M-H]-	Mandelic acid	Organic acids	Organic acids	90-64-2	3	469490	452569	440373	1.11913e+06	2.11118e+06	1.09348e+06	3.24837e+06	5.8679e+06	3.82167e+06	2.23073e+06	1.95227e+06	2.41233e+06	1.45284e+06	1.26943e+06	1.13731e+06	1.94142e+06	1.84074e+06	1.77688e+06	C01984	-
mws0236	124.01	79.96	125.015	C2H7NO3S	[M-H]-	2-Aminoethanesulfonic acid	Organic acids	Organic acids	107-35-7	3	465114	394593	223377	185147	170928	187676	168950	162632	163533	295074	263254	288770	400194	360824	397485	260481	260615	240846	C00245	ko00430,ko00920,ko01100,ko02010
Zmpn003698	305.25	59.01	306.256	C20H34O2	[M-H]-	11,14,17-Eicosatrienoic acid*	Lipids	Free fatty acids	17046-59-2	3	8221.65	29575.4	18628.1	6144.72	10046.8	7363.23	15315.6	9644.46	7735.17	40269.5	26975.8	23989.7	39460.7	29629	31083.6	26167.7	28049.1	28497.3	C16522	ko01040
Lmbn006210	305.25	59.01	306.256	C20H34O2	[M-H]-	Dihomo-gamma-linolenic acid; (8Z,11Z,14Z)-Icosatrienoic acid*	Lipids	Free fatty acids	1783-84-2	3	8221.65	29575.4	18628.1	6144.72	10046.8	7363.23	15315.6	9644.46	7735.17	40269.5	26975.8	23989.7	39460.7	29629	31083.6	26167.7	28049.1	28497.3	C03242	ko00591,ko01040,ko01100
Lmdp004892	535.11	287.05	534.101	C24H22O14	[M+H]+	Kaempferol-3-O-(6''-malonyl)galactoside*	Flavonoids	Flavonols	-	1	418453	6358930	2.16043e+07	492168	217680	245338	43345	63350	33340	39921.6	35010	91908.1	48345	30010	26328.3	1.59038e+06	1.67366e+06	1.73966e+06	-	-
pmb2786	293.21	235.17	294.219	C18H30O3	[M-H]-	9-Hydroxy-10,12,15-octadecatrienoic acid	Lipids	Free fatty acids	89886-42-0	1	6.14601e+06	6.89955e+06	7.74928e+06	1.44154e+06	2.53182e+06	1.24291e+06	822077	960317	757821	2.95657e+06	1.93423e+06	2.33426e+06	1.48189e+06	1.43346e+06	1.52689e+06	2.63483e+06	2.77886e+06	2.88182e+06	C16326	ko00592
Lmmp005689	301.07	258.05	300.063	C16H12O6	[M+H]+	Cajanin	Flavonoids	Isoflavones	32884-36-9	1	429655	367596	481997	35375.9	27480.7	31259.2	40751.6	68208.7	73557.4	2.25481e+06	2.05535e+06	2.13521e+06	3.23881e+06	2.98629e+06	2.62207e+06	1.74353e+06	1.87484e+06	1.72997e+06	C10203	-
Lmmn004491	987.49	987.49	988.488	C48H76O21	[M-H]-	Medicagenic acid-3-O-glucosyl-(1,6)-glucosyl-(1,3)-glucoside	Terpenoids	Triterpene Saponin	37838-43-0	2	2.85143e+07	2.7164e+07	3.05154e+07	612825	867030	804694	588469	434201	540945	1.85735e+06	1.27873e+06	1.14127e+06	943744	1.02511e+06	1.25787e+06	7.16218e+06	7.56695e+06	6.92592e+06	C08959	-
pme2566	217.08	199.07	218.09	C8H14N2O5	[M-H]-	5-L-Glutamyl-L-amino acid	Amino acids and derivatives	Amino acids and derivatives	5875-41-2	3	178644	152946	331443	123001	218083	125023	126284	77451.8	171283	700879	743536	582583	275541	360143	175481	285834	297474	312629	-	-
HJN003	385.11	223.06	386.121	C17H22O10	[M-H]-	1-O-Sinapoyl-β-D-glucose	Phenolic acids	Phenolic acids	-	2	7.42869e+06	4.42523e+06	13375050	1.89032e+06	1.80811e+06	2.10198e+06	21675	36350.5	68355	23330.7	34542.3	37590.8	26607.6	20010.7	21839.9	2.30069e+06	2.10242e+06	2.21905e+06	C01175	ko00940,ko01110
Zjxp110310	253.18	161.13	252.173	C15H24O3	[M+H]+	5-Hydroxy-12-oxofarnesol	Terpenoids	Sesquiterpenoids	-	3	88323.2	106710	53106.2	395759	383208	539849	732991	679854	730451	298361	240016	274083	241413	262677	237562	245931	269060	255762	-	-
Lmtn002997	493.1	331.05	494.106	C22H22O13	[M-H]-	Mearnsetin-3-O-glucoside	Flavonoids	Flavones	-	2	191800	96705	310345	2.42064e+06	1.25536e+06	8.4774e+06	132172	105954	204400	38871.6	13340	33404.2	6771.27	20470.9	25478.1	765260	837233	795600	-	-
pme0170	217.13	158.08	216.122	C8H16N4O3	[M+H]+	N-Acetyl-L-Arginine	Amino acids and derivatives	Amino acids and derivatives	155-84-0	2	7.00577e+06	5.48681e+06	6.5919e+06	668695	2.12928e+06	717452	1.58017e+06	3.67828e+06	1.59328e+06	810577	909159	885980	1.00908e+06	849367	1.34423e+06	3.08209e+06	2.84497e+06	2.85999e+06	-	-
Lsjp211203	209.15	55.05	208.146	C13H20O2	[M+H]+	3R-3-hydroxy-β-ionone	Others	Others	-	3	5.75409e+06	5.26247e+06	5.50753e+06	1.07705e+06	1.19552e+06	1.52331e+06	426546	356853	390215	258256	275164	341007	156266	162839	235366	1.64598e+06	1.51371e+06	1.63119e+06	-	-
mws1155	181.07	101.02	182.079	C6H14O6	[M-H]-	D-Mannitol*	Others	Saccharides	69-65-8	1	2.68347e+06	3.02896e+06	900087	1.61226e+06	3.85063e+06	1.55576e+06	6.27613e+06	3.65237e+06	892457	219676	212291	218722	227801	251993	346292	2.50865e+06	2.71916e+06	2.5236e+06	C00392	ko00051,ko01100,ko02010
Hmhp001812	282.12	136.06	281.112	C11H15N5O4	[M+H]+	2'-O-Methyladenosine	Nucleotides and derivatives	Nucleotides and derivatives	2140-79-6	1	2.65271e+07	1.20316e+07	5.63418e+07	2.51579e+06	1.21347e+07	2.97703e+06	1.58211e+06	1.58766e+06	1.79902e+06	2.64726e+06	3.82597e+06	4.65022e+06	2.42009e+06	2.05361e+06	2.82726e+06	6.51863e+06	6.78243e+06	7.13628e+06	-	-
pmb2657	289.12	131.08	290.123	C10H18N4O6	[M-H]-	Argininosuccinic acid	Organic acids	Organic acids	2387-71-5	3	209993	190115	575965	944714	465631	947640	1.53466e+06	1.54013e+06	1.517e+06	1.42317e+06	1.36618e+06	1.24998e+06	1.14234e+06	1.38357e+06	1.10779e+06	1.09542e+06	1.02523e+06	1.11994e+06	C03406	ko00220,ko00250,ko01100,ko01110,ko01230
Zbsp005869	345.1	315.05	344.09	C18H16O7	[M+H]+	7,4'-Dihydroxy-3,5,3'-trimethoxyflavone*	Flavonoids	Flavones	-	1	17354.6	47862.6	47560.3	1.18814e+07	1.47435e+07	1.70636e+07	15031996	1.76417e+07	1.30567e+07	5.61161e+06	6.11617e+06	5.39476e+06	3.58581e+06	3.77451e+06	3.13853e+06	5.80146e+06	6.33465e+06	6.20718e+06	-	-
Lmmp004600	889.2	331.08	888.196	C40H40O23	[M+H]+	Tricin-7-O-[(2''-Sinapoyl)glucuronyl](2→1)glucuronide	Flavonoids	Flavones	-	2	2.6094e+07	3.57824e+07	5.51984e+07	113775	35300.1	30010	30633	10005	42624.2	17336030	12412135	8.80917e+06	2.44221e+06	3.13539e+06	4.67511e+06	23889085	24986195	22809515	-	-
Lakn002786	417.11	152.01	418.111	C17H22O12	[M-H]-	Protocatechuic acid xylosyl xyloside	Phenolic acids	Phenolic acids	-	1	6.3546e+07	5.57621e+07	1.2338e+08	2.3032e+06	7.20344e+06	9.11271e+06	205102	57222.1	114477	1.71544e+06	1.3832e+06	1.98565e+06	1.41638e+06	763261	564930	1.73692e+07	1.75349e+07	1.61176e+07	-	-
pmn001505	763.43	763.4	764.435	C41H64O13	[M-H]-	Oleanolic acid-3-O-xylosyl(1→3)glucuronide	Terpenoids	Triterpene Saponin	-	3	721066	826881	1.73039e+06	1.87962e+06	9.00431e+06	5.36397e+07	7.86508e+06	5.36562e+06	1.03441e+07	6.93043e+06	1.16047e+07	3.81011e+06	3.65505e+06	7.46426e+06	3.62972e+06	7.21652e+06	7.72095e+06	7.08778e+06	-	-
pmn001700	455.35	455.35	456.36	C30H48O3	[M-H]-	24,30-Dihydroxy-12(13)-ene-lupeol*	Terpenoids	Triterpene	-	2	172144	165009	557996	987809	893021	1.12236e+06	866089	1.10742e+06	878785	321937	522520	437907	255530	529743	226845	484289	521881	526918	-	-
Lmlp002994	190.09	175.06	189.079	C11H11NO2	[M+H]+	5-Hydroxyquinoline	Alkaloids	Quinoline alkaloids	578-67-6	3	22521	66992.1	41040.3	69468.4	122294	93615.3	411112	270637	440697	271344	262888	304944	276757	216522	244597	219391	240277	231968	-	-
Qmyp101334	293.21	151.11	292.204	C18H28O3	[M+H]+	JiangxiBaiyingsu I	Terpenoids	Sesquiterpenoids	-	1	639590	660787	205300	264429	513292	666116	1.61448e+06	1.41964e+06	2.25224e+06	1.03326e+06	1.18782e+06	782733	1.34345e+06	1.81247e+06	1.64846e+06	1.0763e+06	1.13549e+06	1.03701e+06	-	-
Zahn004036	159.04	115.05	160.052	C10H8O2	[M-H]-	2,3-Dihydro-1,4-naphthoquinone	Quinones	Quinones	21545-31-3	3	2.484e+06	1.84304e+06	1.23641e+06	2.25544e+06	2.00637e+06	1.68934e+06	3.1261e+06	3.44355e+06	2.82886e+06	4.3955e+06	4.59345e+06	4.62802e+06	4.51828e+06	4.265e+06	3.81218e+06	3.15416e+06	2.91681e+06	2.91611e+06	-	-
Qmxp101615	349.27	179.14	348.266	C22H36O3	[M+H]+	Ent-3β-Acetoxyisopimar-15-8β-ol	Terpenoids	Ditepenoids	-	1	5.76207e+07	7.20957e+07	3.27915e+07	3.39011e+06	2.68102e+06	4.2376e+06	5.83518e+06	5.26861e+06	5.68718e+06	3.7181e+07	3.18049e+07	2.61723e+07	4.7507e+07	4.25534e+07	3.73726e+07	2.88717e+07	2.66818e+07	2.67056e+07	-	-
mws1173	271.06	243.07	272.068	C15H12O5	[M-H]-	Garbanzol	Flavonoids	Flavonols	1226-22-8	3	453712	381859	222257	79665.3	67360.1	84712.8	177878	183929	124604	911743	1.02134e+06	913428	1.48678e+06	1.21354e+06	1.45426e+06	751746	686226	713695	C09751	ko00941
MWSmce329	185.08	125.06	184.074	C9H12O4	[M+H]+	Antiarol; 3,4,5-Trimethoxyphenol	Phenolic acids	Phenolic acids	642-71-7	3	412265	148777	190524	42488.2	58400.8	397553	978843	243329	1.36626e+06	1.70669e+06	3.48791e+06	5703685	1.74226e+06	1.68921e+06	2.43374e+06	1.56718e+06	1.43151e+06	1.52296e+06	C10765	-
Lalp005180	257.04	257.05	256.037	C14H8O5	[M+H]+	1,4,5-trihydroxyanthraquinone	Quinones	Anthraquinone	-	2	180120	285422	362744	150842	411699	607624	193094	201815	118013	4.39321e+06	3.68618e+06	3.05e+06	892442	936804	919474	1.02879e+06	960041	1.04865e+06	-	-
Jmzn006005	177.06	117.04	178.063	C10H10O3	[M-H]-	3,4-Methylenedioxy cinnamyl alcohol	Lignans and Coumarins	Lignans	58095-76-4	3	1.59452e+06	2.15947e+06	190150	260638	92068.1	307402	57262.7	79208.6	70127.4	127331	87665.2	115114	115963	96497.7	97503	190723	177513	175343	-	-
Wayp004564	182.08	136.08	181.074	C9H11NO3	[M+H]+	4-hydroxy-4-(3-pyridyl)-butanoic acid	Alkaloids	Pyridine alkaloids	15569-97-8	3	3.0181e+06	4.09661e+06	5.6785e+06	1.32875e+06	1.1797e+06	1.43118e+06	711430	461721	746112	1.17641e+06	1.16344e+06	1.1349e+06	940593	1.13982e+06	784124	1.67764e+06	1.64753e+06	1.53614e+06	C19579	-
MWSmce355	211.06	181.01	212.069	C10H12O5	[M-H]-	Methyl Syringate	Phenolic acids	Phenolic acids	884-35-5	3	76140.9	69056.9	73819.1	291512	376164	363581	569881	613429	692189	182001	170967	189389	97021.8	132862	100992	175249	173960	161089	-	-
pme2853	172.1	74.02	173.105	C8H15NO3	[M-H]-	Hexanoyl-L-glycine	Amino acids and derivatives	Amino acids and derivatives	24003-67-6	3	29622.7	47049.7	30112.1	10005	40667.5	33340	33089.4	89839.8	86700	260456	260471	251815	384832	340136	329580	164669	163858	177709	-	-
pmn001553	315.11	153.06	316.116	C14H20O8	[M-H]-	Cimidahurinine	Phenolic acids	Phenolic acids	142542-89-0	2	5.20602e+06	5.73258e+06	7.06038e+06	571189	578766	675643	1375.75	1832.95	9	3331.14	5544.85	7607.65	3184.12	5474.6	4912.72	1.23089e+06	1.20311e+06	1.31379e+06	-	-
MWSHC20125	335.08	135.05	336.084	C16H16O8	[M-H]-	5-O-Caffeoylshikimic acid	Phenolic acids	Phenolic acids	73263-62-4	1	475523	747116	557919	1.17918e+07	1.45723e+06	2.96536e+06	45010	52467.7	155509	9	9	9	9	9	9	961316	876494	922981	-	-
Wbwn006662	367.08	337.03	368.09	C20H16O7	[M-H]-	[2,5-Bis(1,3-benzodioxol-5-yl)-4-(hydroxymethyl)furan-3-yl]methanol	Lignans and Coumarins	Lignans	-	2	74674.2	64704.9	126445	567108	1.4068e+06	1.03715e+06	2.69774e+06	4.54088e+06	2.70954e+06	229034	713576	1.26659e+06	400544	629760	171206	929016	972248	1.01886e+06	-	-
Wbmp010456	277.22	93.07	276.209	C18H28O2	[M+H]+	Macrophypene B	Terpenoids	Ditepenoids	-	1	958572	816479	1.33999e+06	109069	247129	216314	416814	295358	384379	1.5914e+06	1.59329e+06	1.45842e+06	1.68474e+06	1.73348e+06	1.89117e+06	1.40955e+06	1.49409e+06	1.54513e+06	-	-
Lakn005184	513.2	249.06	514.205	C24H34O12	[M-H]-	1'S,4'S-4'-Dihydroabscisic acid-4′-O-β-malonylglucopyranoside	Terpenoids	Sesquiterpenoids	-	1	4.48007e+06	5.27095e+06	4.54366e+06	23436.2	71005.6	65020	47485.3	97883.8	75975.8	1.80189e+06	2.00642e+06	1.86846e+06	2.34049e+06	2.19025e+06	2.27472e+06	2.29629e+06	2.50873e+06	2.35188e+06	-	-
pmn001423	385.19	223.14	386.194	C19H30O8	[M-H]-	Roseoside	Others	Ketone compounds	54835-70-0	3	1.13467e+07	7.29483e+06	2.03855e+07	1.11174e+06	1.142e+06	1.71418e+06	18276.1	7127.85	38376.3	24882.8	26500.2	53342.3	40010	17527	15133.7	2.87946e+06	2.81375e+06	3.0735e+06	-	-
Zblp005270	271.1	151.04	270.089	C16H14O4	[M+H]+	4,4'-Dihydroxy-2-methoxychalcone; Echinatin	Flavonoids	Chalcones	34221-41-5	1	861142	730566	87739.1	14324.3	15756.3	35010	31305.4	55015	76280	254192	327053	445651	372741	422951	643027	372003	376820	404953	-	-
MWS2984	153.05	136.03	152.045	C4H4N6O	[M+H]+	8-Azaguanine	Nucleotides and derivatives	Nucleotides and derivatives	134-58-7	2	1.05455e+06	1.44636e+06	693266	55126	2.0022e+06	87951.3	2.82493e+06	4.04306e+06	2.98961e+06	1.23922e+06	1.38494e+06	1.36085e+06	1.40694e+06	1.60917e+06	1.28812e+06	2.07776e+06	2.02068e+06	1.89648e+06	-	-
Wagp008723	345.1	312.06	344.09	C18H16O7	[M+H]+	Mikanin	Flavonoids	Flavones	4324-53-2	1	59692.5	30265.9	22639.2	3.68454e+06	3.96898e+06	4.64224e+06	4.08512e+06	4.99042e+06	4.07822e+06	1.65058e+06	1.54235e+06	1.45815e+06	1.0899e+06	942256	810270	1.61291e+06	1.63396e+06	1.75628e+06	-	-
Zbn004415	595.13	300.03	596.14	C26H28O16	[M-H]-	5,6-Dihydroxylucidin-3β-primeveroside	Quinones	Anthraquinone	-	1	360291	276005	870133	80417.9	3.58639e+06	4.53694e+06	927448	249242	802133	3.71998e+06	2.70527e+06	3.83745e+06	2.0241e+06	660882	553355	1.75822e+06	1.71986e+06	1.87883e+06	-	-
Lmhn002574	431.06	137.03	432.069	C20H16O11	[M-H]-	Caffeoyl(p-Hydroxybenzoyl)tartaric acid	Phenolic acids	Phenolic acids	-	3	281143	385033	217911	85070.1	176238	163159	121114	162544	115149	171393	182273	233037	245260	71604.5	213921	198478	210730	217647	-	-
Lmsn003111	325.09	145.03	326.1	C15H18O8	[M-H]-	1-O-p-Coumaroyl-β-D-glucose*	Phenolic acids	Phenolic acids	7139-64-2	2	2.21694e+06	3.57336e+06	1.99585e+06	9.87831e+06	1.80125e+06	1.80995e+06	34286.7	18063.5	42650.7	19023.7	41935.4	39292.5	53381.2	41283.4	23674.2	1.4361e+06	1.3195e+06	1.33461e+06	C16827	-
Hmln007772	293.18	221.16	294.183	C17H26O4	[M-H]-	Nordihydrocapsiate	Phenolic acids	Phenolic acids	220012-53-3	3	9.0199e+06	8.7523e+06	9.32692e+06	9.94049e+06	1.02973e+07	1.01583e+07	1.08753e+07	1.01931e+07	1.01294e+07	1.00523e+07	1.0212e+07	1.4718e+07	8.1332e+06	8.52763e+06	9.07512e+06	1.44713e+07	1.43489e+07	1.32845e+07	-	-
pme3146	145.06	102.06	146.069	C5H10N2O3	[M-H]-	β-Ureidoisobutyric acid	Organic acids	Organic acids	2905-86-4	3	66258.8	58951.4	64890.1	35616.4	113482	45059.9	49806.5	94879.2	42655.6	76374	92765	72426	162039	143797	128658	83713.1	90041.4	82701	C05100	-
pmp001265	480.35	318.3	479.346	C24H49NO8	[M+H]+	2-Amino-4-dihydroxy octadecyl galactoside	Alkaloids	Alkaloids	-	3	27716	30045.2	56986.5	127618	212893	172389	1.12282e+06	647773	825919	428197	487931	435460	501131	514821	402596	385799	405875	369918	-	-
Hmtn001120	315.109	153.056	316.116	C14H20O8	[M-H]-	5-(2-Hydroxyethyl)-2-O-glucosylphenol	Phenolic acids	Phenolic acids	-	3	4.88679e+06	5.98775e+06	7.51001e+06	606446	619224	696221	9	1367.73	917.164	3184.12	8525.95	11017.6	9045.9	5005	3578.38	1.20832e+06	1.24282e+06	1.3226e+06	-	-
pme0137	187.07	125.07	188.08	C7H12N2O4	[M-H]-	N-Acetyl-L-Glutamine	Amino acids and derivatives	Amino acids and derivatives	2490-97-3	3	458709	561313	290357	511500	1.21951e+06	474488	2.52133e+06	2.32103e+06	1.96713e+06	1.17007e+06	1.0652e+06	1.34981e+06	1.03969e+06	857790	1.10725e+06	1.05613e+06	1.13707e+06	1.15329e+06	-	-
MWSslk080	187.13	141.13	188.141	C10H20O3	[M-H]-	10-Hydroxydecanoic acid	Lipids	Free fatty acids	1679-53-4	2	34480.7	25941.5	21323.9	697496	884019	640779	1.95188e+06	2.87834e+06	2.24354e+06	690362	726579	751694	768777	744544	438300	642131	595670	590482	C02774	-
mws0103	146.06	91.05	145.053	C9H7NO	[M+H]+	Indole-3-carboxaldehyde	Alkaloids	Plumerane	487-89-8	1	1.50482e+06	3.93349e+06	1.54969e+06	3.45303e+06	1.81396e+07	7.36078e+06	5.38875e+06	1.8931e+07	5.95813e+06	2.60917e+06	2.32748e+06	2.46916e+06	2.65507e+06	2.53785e+06	2.96086e+06	4.69365e+06	4.27603e+06	4.46676e+06	C08493	-
Lmgn001670	137.03	108.02	138.032	C7H6O3	[M-H]-	Salicylic acid	Phenolic acids	Phenolic acids	69-72-7	1	740277	702009	845297	575293	693083	1.28994e+06	2.10917e+06	6.94233e+06	2.05519e+06	1.04659e+06	1.1149e+06	1.49591e+06	685012	625387	684213	1.30841e+06	1.38706e+06	1.26523e+06	C00805	ko00996,ko01100,ko01110,ko04075
MWS20182	195.07	136.05	196.074	C10H12O4	[M-H]-	Dihydroferulic Acid	Phenolic acids	Phenolic acids	1135-23-5	2	2324.24	5687.35	1670	5802.9	7547.23	8133.4	361636	288783	424622	4.69235e+06	4.13053e+06	4.5906e+06	5.67271e+06	5.3742e+06	5.29783e+06	3.04303e+06	3.03803e+06	2.80044e+06	-	-
MWS5235	299.26	253.25	300.266	C18H36O3	[M-H]-	12-Hydroxyoctadecanoic acid	Lipids	Free fatty acids	106-14-9	2	42766.5	31187.2	35149.7	27414	451014	36045.8	2.56003e+07	2.20489e+07	2.26827e+07	4.78741e+07	5.47251e+07	4.45602e+07	5.15517e+07	4.62332e+07	4.88551e+07	2.66375e+07	2.90094e+07	2.88262e+07	-	-
mws0489	149.02	77.04	150.032	C8H6O3	[M-H]-	Benzoylformic acid	Organic acids	Organic acids	611-73-4	3	684922	824740	242939	460073	688967	417631	151038	4.82832e+06	117334	90778.1	119691	127689	222142	261133	278562	538756	526415	491825	C02137	ko00360,ko01100
Hmhp011220	298.2	161.13	297.194	C16H27NO4	[M+H]+	10,11-Dihydroxy-N-(2-hydroxy-2-methylpropyl)-2,6,8-dodecatrienam-Ide	Alkaloids	Alkaloids	-	3	13638.5	12929.6	5066.21	599781	335678	255438	258345	357215	346160	59675.7	79005.8	80381.2	47269.8	56464.9	84409	145238	152087	138457	-	-
pma2987	142.1	124.09	141.09	C6H11N3O	[M+H]+	Histidinol	Alkaloids	Alkaloids	501-28-0	3	1.79605e+07	1.82089e+07	1.76505e+07	1.7021e+07	1.78032e+07	1.75768e+07	1.59602e+07	1.80872e+07	1.71537e+07	1.67939e+07	1.69293e+07	1.72667e+07	1.57642e+07	1.62313e+07	1.67876e+07	1.81273e+07	1.87721e+07	1.70967e+07	C00860	ko00340,ko01100,ko01110,ko01230
MWSHY0147	255.07	199.08	254.058	C15H10O4	[M+H]+	Daidzein	Flavonoids	Isoflavones	486-66-8	2	844557	702392	230615	167705	176346	224266	165100	74338.9	165100	557702	692547	591713	1.431e+06	1.16493e+06	1.41296e+06	745830	705874	775329	C10208	ko00943,ko01100,ko01110
pme3184	332.08	136.06	331.068	C10H14N5O6P	[M+H]+	2'-Deoxyadenosine-5'-monophosphate	Nucleotides and derivatives	Nucleotides and derivatives	653-63-4	3	1.11121e+06	975381	1.54056e+06	506038	422399	567882	49431.5	31004.9	43533.9	10020.2	21220	17799.9	20878.9	13013.6	14433.8	219183	223618	239500	C00360	ko00230,ko01100,ko01232
Lmsn003318	355.1	175.04	356.111	C16H20O9	[M-H]-	1-O-Feruloyl-β-D-glucose	Phenolic acids	Phenolic acids	7196-71-6	2	999955	710290	2.41604e+06	5.9892e+06	804679	1.60796e+06	16629.8	42032.7	51006.3	80880.5	65044.2	74304.8	85002.4	75895.1	79773	759132	719134	790003	C17759	-
Zmyn006432	1103.54	1103.54	1104.54	C53H84O24	[M-H]-	Polygalasaponin Xxviii	Terpenoids	Triterpene	176182-01-7	3	9.99262e+06	7.86895e+06	4.57453e+06	57315.2	123164	210259	90942.6	43130.1	242548	372023	637491	278640	212026	194797	193000	1.75349e+06	1.68435e+06	1.84968e+06	-	-
mws4085	223.06	193.02	224.069	C11H12O5	[M-H]-	Sinapic acid	Phenolic acids	Phenolic acids	530-59-6	1	272340	236432	143756	140075	138932	134937	768858	248254	607278	4.85991e+06	4.03506e+06	6.78852e+06	2.24937e+06	2.144e+06	3.23685e+06	2.34939e+06	2.35697e+06	2.16629e+06	C00482	ko00940,ko01100,ko01110
Hmln000297	179.05	59.01	180.063	C6H12O6	[M-H]-	Inositol*	Others	Saccharides	87-89-8	1	5.99286e+06	5.37922e+06	6.628e+06	4.36896e+06	4.56439e+06	3.64798e+06	1.29451e+06	1.24913e+06	1.38888e+06	2.11063e+06	1.98264e+06	2.0589e+06	2.38145e+06	2.28293e+06	2.73023e+06	3.95265e+06	3.79696e+06	3.59656e+06	C00137	ko00052,ko00053,ko00562,ko01100,ko01110,ko01250,ko02010,ko04070
Lhmp122205	301.14	245.09	300.136	C18H20O4	[M+H]+	5-O-Methyllatifolin	Others	Others	-	3	151124	128566	118079	165733	159870	58064.7	63659.8	62178.7	143392	178894	65725.8	114983	146609	96392.9	138160	112222	110268	102549	-	-
Hmcn001884	463.09	301.03	464.096	C21H20O12	[M-H]-	6-Hydroxyluteolin 5-glucoside	Flavonoids	Flavones	-	2	2.15174e+06	1.04961e+06	9.95117e+06	1.3686e+06	7.0562e+06	8.25659e+06	2.44469e+06	596844	1.44252e+06	446616	289264	496381	242511	124807	188197	2.93619e+06	2.76488e+06	2.67639e+06	-	-
mws0629	281.11	166.09	280.106	C13H16N2O5	[M+H]+	L-Aspartyl-L-Phenylalanine	Amino acids and derivatives	Amino acids and derivatives	13433-09-5	3	5.04362e+06	3.75253e+06	1.13123e+07	442522	3.18419e+06	683244	933446	1.43079e+06	918552	3.13931e+06	3.3475e+06	3.41218e+06	3.24052e+06	2.20674e+06	2.93252e+06	2.98421e+06	3.28078e+06	3.1502e+06	-	-
Zmgn000217	129.02	85.03	130.027	C5H6O4	[M-H]-	Itaconic acid	Organic acids	Organic acids	97-65-4	3	341577	277045	204717	318884	438649	363467	794982	649389	790239	381584	470335	445667	326666	297088	317841	390962	356803	366511	C00490	ko00660,ko01100
Wcdp010708	263.24	81.07	262.23	C18H30O	[M+H]+	(2E,9E,12E,15E)-octadeca-2,9,12,15-tetraen-1-ol	Others	Others	-	3	1.41811e+06	1.0075e+06	4.10812e+06	2.16005e+06	2.93321e+06	1.00211e+06	5.14325e+06	7.19432e+06	5.16203e+06	7.33099e+06	7.8163e+06	6.92681e+06	7.58821e+06	8.06376e+06	7.94566e+06	5.5588e+06	5.31127e+06	5.05554e+06	-	-
Lajp006981	329.07	243.07	328.058	C17H12O7	[M+H]+	5,6-Dihydroxy-7-methoxy-3′,4′-dioxymethylene-flavonoid	Flavonoids	Flavones	-	2	339245	259870	328355	24976.8	16787.8	9144.59	17476.4	31899	30319.5	338291	425996	332198	471977	538672	488314	311049	335784	339920	-	-
Zmyn000230	147.03	57.03	148.037	C5H8O5	[M-H]-	2-Dehydro-3-deoxy-L-arabinonate	Others	Saccharides	-	3	9.75759e+06	3.16807e+06	1.91787e+06	3.72397e+06	1.52089e+07	4.29333e+06	5.36342e+06	6221380	4.92771e+06	3.83097e+06	4.202e+06	3.73718e+06	3.20974e+06	2.83068e+06	3.23389e+06	2.37117e+06	2.60763e+06	2.50306e+06	C00684	ko00053,ko01100
Lmbn000216	147.03	57.03	148.037	C5H8O5	[M-H]-	3-Methylmalic acid	Organic acids	Organic acids	152204-30-3	3	9.75759e+06	3.16807e+06	1.91787e+06	3.72397e+06	1.52089e+07	4.29333e+06	5.36342e+06	6221380	4.92771e+06	3.83097e+06	4.202e+06	3.73718e+06	3.20974e+06	2.83068e+06	3.23389e+06	2.37117e+06	2.60763e+06	2.50306e+06	C06032	ko00290,ko00660,ko01100,ko01210,ko01230
pmb0501	131.13	114.1	130.122	C5H14N4	[M+H]+	Agmatine	Alkaloids	Alkaloids	306-60-5	3	701250	514729	516206	283637	1.16705e+06	636947	520296	1678460	599160	1.1156e+06	1.21669e+06	1.03272e+06	1.88566e+06	1.63891e+06	1.38623e+06	1.89717e+06	1.75365e+06	1.74489e+06	C00179	ko00330,ko00999,ko01100,ko01110
Wcdp006247	518.32	184.08	517.317	C26H48NO7P	[M+H]+	1-18:3-LysoPC	Others	Others	-	3	5.13769e+07	5.82502e+07	4.35433e+07	2.00205e+07	2.0332e+07	1.58592e+07	169817	216100	301028	421234	448935	363800	569366	465383	414268	2.39582e+07	2.59336e+07	2.38562e+07	-	-
MWS5209	235.16	118.09	117.079	C5H11NO2	[2M+H]+	N-Methyl-α-aminoisobutyric acid	Amino acids and derivatives	Amino acids and derivatives	2566-34-9	3	8.10969e+06	3.8995e+06	9.8812e+06	1.00071e+08	1.19382e+08	1.2584e+08	6.20231e+06	5.58165e+06	6.95074e+06	3.32374e+06	3.22324e+06	3.53724e+06	2.25757e+06	1.85232e+06	1.96028e+06	4.28295e+06	4.71144e+06	4.52294e+06	-	-
MWS3046	181.05	121.03	182.058	C9H10O4	[M-H]-	3-(3-Hydroxyphenyl)-3-hydroxypropanoic acid	Phenolic acids	Phenolic acids	3247-75-4	3	126905	156282	143847	295541	129946	267503	438085	744873	460668	641369	646834	632823	701432	598582	621287	447142	478794	437177	-	-
mws0145	151.04	93.03	152.047	C8H8O3	[M-H]-	O-Anisic acid (2-Methoxybenzoic acid)	Phenolic acids	Phenolic acids	529-75-9	3	35432.3	95445.9	385233	9303.32	8128.73	16675	17995	27745.5	24381	239033	246980	265017	336029	291219	301498	236763	224314	246857	-	-
Qmyp101340	293.21	119.09	292.204	C18H28O3	[M+H]+	11,12-O-Isopropyfidenesolajiangxin F(ISO1)	Terpenoids	Sesquiterpenoids	-	3	3.59434e+07	2.44746e+07	1.79776e+07	4.32187e+06	5.22606e+06	9.12736e+06	2.37306e+06	463048	2.18996e+06	3.8788e+06	2.7941e+06	3.39405e+06	3.33917e+06	2.60479e+06	3.47614e+06	8.38942e+06	9.21427e+06	8.97617e+06	-	-
Zmjp000182	189.13	70.07	188.127	C7H16N4O2	[M+H]+	N-Monomethyl-L-arginine*	Amino acids and derivatives	Amino acids and derivatives	17035-90-4	2	2.83468e+06	2.9752e+06	2.5564e+06	7.17165e+06	5.88534e+06	3.71629e+06	3.84684e+06	883497	3.69201e+06	2.29897e+06	2.45209e+06	2.70322e+06	1.61648e+06	2.55026e+06	2.68238e+06	3.20563e+06	2.92731e+06	2.99098e+06	C03884	-
Yyyn008289	313.07	298.05	314.079	C17H14O6	[M-H]-	pilloin	Flavonoids	Flavones	32174-62-2	1	61449.6	113888	9	1.77688e+06	2.05359e+06	2.60211e+06	2.14568e+06	1.79108e+06	1.73336e+06	599797	641573	658744	395267	375476	390227	681554	748880	728538	-	-
Lxmp122302	373.22	135.12	372.215	C19H32O7	[M+H]+	Dehydroxyampelopsisionoside	Terpenoids	Sesquiterpenoids	-	3	121447	196810	125486	782563	894387	946563	61685	51680	53350	89483.9	35010	36444.7	33290.4	106938	50015	165503	182230	174157	-	-
Lmqp003432	227.16	121.1	226.157	C13H22O3	[M+H]+	6,9-Dihydroxy-7-megastigmen-3-one	Terpenoids	Sesquiterpenoids	-	2	271930	373351	447721	5.02315e+06	5.59862e+06	7.83812e+06	1.05766e+06	1.12606e+06	1.08708e+06	475973	400225	523383	225555	342721	326153	1.37863e+06	1.25204e+06	1.32436e+06	-	-
Hmln002199	505.1	300.03	506.106	C23H22O13	[M-H]-	Quercetin-3-O-(6''-O-acetyl)galactoside	Flavonoids	Flavonols	-	2	980524	1.10833e+06	2.62243e+07	737147	223300	1.94357e+06	204134	125818	267865	143615	234175	172241	71932.8	22221.1	35601	1.83913e+06	1.90659e+06	2.0223e+06	-	-
Zmgp006231	283.06	225.05	282.053	C16H10O5	[M+H]+	pseudobaptigenin	Flavonoids	Isoflavones	90-29-9	1	1.29167e+07	1.37428e+07	5.95647e+06	123370	138363	134982	158395	155204	184233	9.18283e+06	1.25663e+07	1.04694e+07	1.98829e+07	1.53141e+07	2.15066e+07	1.04223e+07	10499708	1.13565e+07	C10522	ko00943,ko01110
MW0114048	481.14	167.03	482.142	C22H26O12	[M-H]-	Catalposide	Terpenoids	Monoterpenoids	6736-85-2	3	38793.5	67085.6	25790	17713.9	38413.3	24798.4	28352.1	44152.7	27761.1	55995	21675	49659.4	88707.8	75031	78124.7	43408.9	47765.1	46334.5	-	-
Zmyn000268	89.02	71.02	90.0317	C3H6O3	[M-H]-	2,3-Dihydroxypropanal	Others	Saccharides	56-82-6	3	94552.7	171453	64502.6	215940	596535	261573	3.76027e+06	384030	3.6312e+06	3.13739e+06	3.09787e+06	3.13821e+06	2.8374e+06	2.53627e+06	2.66135e+06	2.43581e+06	2.26525e+06	2.225e+06	C02154	-
Ymjm000099	453.34	201.17	452.329	C30H44O3	[M+H]+	3-Oxooleana-11,13(18)-dien-28-oic acid	Terpenoids	Triterpene	-	2	2.48634e+06	4.2059e+06	427392	17403.7	42723.4	19322	26560	63920	75576.5	5.39533e+06	5.38699e+06	5.06363e+06	1.05214e+07	8.53882e+06	7.05471e+06	4.16641e+06	4.25212e+06	4.56505e+06	-	-
Zbdp006427	285.08	253.05	284.068	C16H12O5	[M+H]+	7,8-Dihydroxy-4'-methoxyisoflavone	Flavonoids	Other Flavonoids	-	1	4.94322e+06	3.78077e+06	2.75664e+06	571178	228520	289025	518100	1.23462e+06	404187	3.81571e+06	4.11183e+06	3.44777e+06	9.12486e+06	7.10532e+06	8.44992e+06	4.58612e+06	4.80405e+06	5.05304e+06	-	-
Zmyn000247	147.03	57.0346	148.037	C5H8O5	[M-H]-	2-Hydroxyglutaric Acid	Organic acids	Organic acids	13095-48-2	3	3.91126e+06	5.14565e+06	2.40566e+06	4.2879e+06	6.57403e+06	4.77367e+06	6.95524e+06	3.43847e+06	6.62681e+06	4.41903e+06	4.41377e+06	5.28796e+06	3.48158e+06	3.5762e+06	3.70963e+06	3.99678e+06	3.6974e+06	4.04972e+06	C03196	ko00310,ko01100
Lmqn000780	606.08	384.98	607.082	C17H27N3O17P2	[M-H]-	Uridine 5'-diphospho-N-acetylglucosamine	Nucleotides and derivatives	Nucleotides and derivatives	528-04-1	3	191138	159471	121443	157722	249100	217814	4248.09	4001.31	7897.57	6501.08	2180.35	4443.87	8883.09	6877.44	2150.29	51169	56249.1	52802.5	C00043	ko00520,ko00524,ko01100,ko01250
Lcsn006884	213.11	169.12	214.12	C11H18O4	[M-H]-	2,2'-(3-methylcyclohexane-1,1-diyl)diacetic acid	Organic acids	Organic acids	5345-12-0	1	374996	617978	432751	849043	502361	441684	785085	465801	751210	384108	610393	717661	333745	633711	649131	754250	694483	758409	-	-
pme0166	167.06	110.03	166.049	C6H6N4O2	[M+H]+	1-Methylxanthine	Nucleotides and derivatives	Nucleotides and derivatives	6136-37-4	3	292232	408709	76032.7	39762.2	309678	59071	447018	599582	530564	538234	789001	610452	1.80719e+06	1.59903e+06	1.4544e+06	818937	769049	744709	C16358	ko00232,ko01100,ko01110
mws1164	179.06	59.01	180.063	C6H12O6	[M-H]-	D-Fructose*	Others	Saccharides	57-48-7	1	6.09042e+06	5.86731e+06	7.25574e+06	4.49567e+06	5.51658e+06	3.98303e+06	1.39124e+06	441431	1.52317e+06	2.30416e+06	2.20116e+06	2.37517e+06	2.56462e+06	2.5449e+06	2.93878e+06	3.66871e+06	3.72758e+06	3.39858e+06	C05003	-
pmb0876	454.29	313.27	453.286	C21H44NO7P	[M+H]+	LysoPE 16:0	Lipids	LPE	53862-35-4	2	9.46176e+06	1.02677e+07	1.87225e+07	8.56269e+06	1.39549e+07	5.35527e+06	553263	498075	983651	224736	247106	342900	128206	114670	203799	6.06024e+06	6.2012e+06	5.64156e+06	-	-
Wasn000977	311.1	89.24	312.106	C11H20O10	[M-H]-	4-O-galactopyranosylxylose	Others	Saccharides	14087-31-1	2	442738	369596	432835	2.49438e+06	2.81663e+06	2.46708e+06	332471	208922	292161	191038	136863	180580	106233	118301	133883	787003	856530	858359	-	-
MWS0631	199.97	80.96	200.977	C3H7NO5S2	[M-H]-	S-Sulfo-L-Cysteine	Amino acids and derivatives	Amino acids and derivatives	1637-71-4	3	101288	83943.8	143182	13551.7	12888	12072.1	6014	1486.97	9139.51	156644	183367	170740	307842	248193	251020	134279	143717	147776	C05824	ko00270,ko01100,ko01230
pme0128	159.08	88.04	160.085	C6H12N2O3	[M-H]-	L-Alanyl-L-Alanine	Amino acids and derivatives	Amino acids and derivatives	1948-31-8	3	100463	117737	129579	65927.5	173909	40751.1	37736.5	37728.1	36381.1	57502	36822.8	50436.4	72315	72316.4	60963.5	87830.3	95820.8	88507.6	-	-
Walp004752	218.21	88.08	217.204	C12H27NO2	[M+H]+	2-Aminododecane-1,4-diol	Lipids	Sphingolipids	-	2	1.56823e+06	1.33593e+06	1.43075e+06	1.36839e+06	1.27702e+06	1.52877e+06	1.4078e+06	1.74065e+06	1.4504e+06	1.34162e+06	1.33208e+06	1.58192e+06	186953	1.23668e+06	3122195	2.02348e+06	1.96248e+06	1.83736e+06	-	-
MWS20152	417.16	402.1	418.163	C22H26O8	[M-H]-	Syringaresinol	Lignans and Coumarins	Lignans	21453-71-4	2	137280	68357.7	71001	507099	400144	470987	1.47506e+06	1.46886e+06	1.59965e+06	531788	645793	827234	636021	595692	565768	486700	484578	528033	C10889	-
pmb0725	669.18	331.08	668.174	C33H32O15	[M+H]+	Tricin-7-O-(2''-feruloyl)glucoside	Flavonoids	Flavones	-	3	6.1928e+06	1.15134e+07	2.20207e+07	36675	63350	134708	19836.6	6327.16	14927	508527	308866	377499	233120	235144	225457	2.13061e+06	2.34478e+06	2.28504e+06	-	-
mws1333	341.11	113.02	342.116	C12H22O11	[M-H]-	Melibiose	Others	Saccharides	585-99-9	3	2.36944e+07	2.16436e+07	2.00954e+07	1.83366e+07	9.3741e+06	1.04533e+07	182447	111919	257967	280704	564292	481198	307327	232894	440082	1.70164e+07	1.87569e+07	1.81262e+07	C05402	ko00052,ko01100,ko02010
Lmmn005168	335.22	335.22	336.23	C20H32O4	[M-H]-	Siegesbeckic acid	Terpenoids	Ditepenoids	-	2	5398.05	6574.83	3843.22	4.19044e+06	4.19564e+06	4.9229e+06	5.39271e+06	5.13758e+06	5.0864e+06	2.48931e+06	2.32522e+06	2.35035e+06	1.432e+06	1.851e+06	1.25171e+06	1.779e+06	1.75043e+06	1.917e+06	-	-
Zahp013728	338.34	338.34	337.334	C22H43NO	[M+H]+	octadecanoic acid pyrrolidide	Alkaloids	Alkaloids	33707-76-5	3	2.82552e+06	1.65024e+06	1.30822e+06	1.65826e+06	3.92634e+06	3.34291e+06	4.37023e+06	5.90007e+06	6.23259e+06	5.33335e+06	5.9036e+06	6.38626e+06	6.09004e+06	4.68563e+06	6.29284e+06	5.44724e+06	5.50698e+06	5.95441e+06	-	-
pmp000661	219.17	107.05	218.167	C15H22O	[M+H]+	Cryptomerione	Terpenoids	Sesquiterpenoids	5988-72-7	2	197163	640844	9	1.42776e+06	7.92884e+06	2.37153e+06	4.23683e+06	5.17731e+06	5.30665e+06	775451	936749	904152	1.49784e+06	447662	377768	1.40238e+06	1.47962e+06	1.34133e+06	-	-
pme1228	221.09	204.07	220.085	C11H12N2O3	[M+H]+	5-Hydroxy-L-tryptophan	Amino acids and derivatives	Amino acids and derivatives	4350-09-8	3	2.36436e+06	3.81876e+06	5.51688e+06	434037	249695	347083	256194	139105	296009	2.15337e+06	2.20884e+06	2.22143e+06	3.48526e+06	3.12886e+06	2.39119e+06	2.36706e+06	2.16372e+06	2.19107e+06	C00643	ko00380,ko01100
MWSmce557	151.09	109.08	150.079	C8H10N2O	[M+H]+	2-Acetyl-3-ethylpyrazine	Alkaloids	Alkaloids	32974-92-8	3	351280	351093	241060	283203	396090	263964	636606	823665	731666	694702	634513	646467	629325	563210	458974	533619	490027	535338	-	-
mws0749	137.02	93.03	138.032	C7H6O3	[M-H]-	4-Hydroxybenzoic acid	Phenolic acids	Phenolic acids	99-96-7	2	1.09256e+06	930353	749390	477019	1.06382e+06	631613	2.6611e+06	3.41054e+06	2.61174e+06	4.23685e+06	3.87257e+06	4.07921e+06	3.95451e+06	3.87768e+06	3.92812e+06	2.85894e+06	2.9535e+06	2.67774e+06	C00156	ko00130,ko00790,ko01100,ko01110,ko01240
pme2996	161.02	117.03	162.032	C9H6O3	[M-H]-	4-Hydroxycoumarin	Lignans and Coumarins	Coumarins	1076-38-6	3	302681	457049	166535	822229	1.64416e+06	1.14668e+06	1.26449e+06	1.22284e+06	1.17384e+06	630013	717124	703037	972618	892400	799126	627891	669624	692727	C20414	-
Wbtn014060	377.14	377.14	378.147	C23H22O5	[M-H]-	Nigrolineaxanthone K	Flavonoids	Other Flavonoids	864516-31-4	3	225706	196941	135159	281076	318812	247526	610375	580234	619999	693013	756809	681768	730760	593780	744902	489049	533170	533958	-	-
Wcsn009636	357.2	275.2	358.214	C22H30O4	[M-H]-	Mediterraneone	Others	Others	133301-13-0	3	708527	650334	584254	182868	446970	266564	388835	214161	282746	1.0004e+06	1.10897e+06	1.10384e+06	1.1062e+06	1.04667e+06	857405	882666	810744	886897	-	-
Hamp007385	301.11	181.05	300.1	C17H16O5	[M+H]+	5-hydroxy-7,8-dimethoxyflavanone	Others	Others	-	2	106422	66086.8	116930	4.32359e+07	4.9984e+07	6.34694e+07	4.78989e+07	4.86111e+07	4.03019e+07	1.22399e+07	1.2493e+07	1.1757e+07	6.93874e+06	8.15256e+06	7.42006e+06	1.68893e+07	1.86467e+07	1.76313e+07	-	-
pmb0530	664.12	136.06	663.109	C21H27N7O14P2	[M+H]+	Nicotinic acid adenine dinucleotide	Nucleotides and derivatives	Nucleotides and derivatives	53-84-9	3	2.00374e+06	1.69311e+06	1.09532e+06	1.09137e+06	912449	884802	140393	77717.1	235529	180214	174261	224284	195283	179843	180116	516408	471543	512722	C00003	ko00190,ko00730,ko00760,ko01100,ko01240
pmb0981	348.07	136.06	347.063	C10H14N5O7P	[M+H]+	Adenosine 5'-monophosphate	Nucleotides and derivatives	Nucleotides and derivatives	61-19-8	3	2.46149e+06	3.42419e+06	604492	3.71774e+06	3.21548e+06	1.54313e+06	237595	275478	265144	79446.7	96158.5	56642.8	62343.6	67168.7	53112.3	402507	374620	366189	C00020	ko00230,ko00908,ko01100,ko01110,ko01232,ko01240
pmb3142	299.08	137.02	300.084	C13H16O8	[M-H]-	Salicylic acid-2-O-glucoside	Phenolic acids	Phenolic acids	10366-91-3	3	1.83231e+07	2.26962e+07	2.29085e+07	1.46971e+07	9.38834e+06	9.64221e+06	64101.5	83861.5	51314.8	65679.2	62607.7	70945.3	48010.2	58535.4	90334.5	5.2343e+06	5.25324e+06	4.80364e+06	-	-
mws1066	579.17	271.06	580.179	C27H32O14	[M-H]-	Naringenin-7-O-Rutinoside(Narirutin)*	Flavonoids	Flavanones	14259-46-2	3	449906	476506	324623	523443	575979	535016	734373	842080	598230	769584	683549	660051	701283	767331	770235	555073	575841	612400	C09793	-
pme2125	503.16	179	504.169	C18H32O16	[M-H]-	Raffinose*	Others	Saccharides	512-69-6	3	3.94728e+06	2.87996e+06	3.92506e+06	1.7302e+06	1.97811e+06	2.89016e+06	61113.4	47797.8	67820.1	81586.6	591958	94520.4	191430	103665	284831	2.13007e+06	2.34884e+06	2.28739e+06	C00492	ko00052,ko01100,ko02010
pmp000006	345.1	330.07	344.09	C18H16O7	[M+H]+	Eupatilin (5,7-Dihydroxy-3',4',6-Trimethoxyflavone)*	Flavonoids	Flavones	22368-21-4	2	54097.7	46828.6	32780	3.34662e+07	3.90546e+07	4.5926e+07	4.11753e+07	5.17327e+07	3.58773e+07	1.51902e+07	1.78433e+07	1.47894e+07	1.1196e+07	1.04621e+07	9.55474e+06	1.58697e+07	1.624e+07	1.74514e+07	C10040	-
Layp000971	332.13	152.07	331.127	C14H21NO8	[M+H]+	Hydroxymenisdaurin D	Alkaloids	Alkaloids	-	2	1.38918e+07	1.57298e+07	2.15291e+07	7.06328e+06	5.12455e+06	8.39874e+06	566022	418836	456961	178854	146289	252930	116211	108848	156266	2.72776e+06	2.53423e+06	2.48248e+06	-	-
Lmsn002887	311.08	163.04	312.084	C14H16O8	[M-H]-	1-O-Caffeoyl-β-D-xylose	Phenolic acids	Phenolic acids	-	2	115779	107250	172575	72621.9	31871.9	59777.3	1.08087e+06	248471	1.19853e+06	615175	587798	646678	558603	501620	466423	384573	375476	413076	-	-
Hmsn002948	417.14	109.03	418.147	C18H26O11	[M-H]-	2-Hydroxyphenol-1-O-glucosyl(6→1)rhamnoside	Phenolic acids	Phenolic acids	-	2	1.07226e+07	9.14692e+06	2.16745e+07	392646	1.22786e+06	1.3884e+06	66685	41817	133533	237672	238252	317730	227377	140230	103985	2.61681e+06	2.79426e+06	2.89045e+06	-	-
MWSmce085	313.04	298.02	314.043	C16H10O7	[M-H]-	Wedelolactone	Lignans and Coumarins	Coumarins	524-12-9	3	2.54095e+06	1.98838e+06	1.82211e+06	9	9	9	63129.6	89494.3	178553	4.56271e+06	5.30911e+06	4.56233e+06	8.48244e+06	7.57435e+06	8.25803e+06	4.24884e+06	4.36341e+06	4.67861e+06	C10541	-
Lthp012013	231.14	157.1	230.131	C15H18O2	[M+H]+	Dehydrocostuslactone	Terpenoids	Sesquiterpenoids	477-43-0	2	294778	511918	113712	2.00562e+06	2.08108e+06	2.32213e+06	2.27964e+06	2.98334e+06	2.23469e+06	906730	923970	808847	612369	638075	584871	783612	854107	784117	C09387	-
Hmqn000843	301.09	123.01	302.1	C13H18O8	[M-H]-	Tachioside*	Phenolic acids	Phenolic acids	109194-60-7	2	2.3729e+06	2.18837e+06	2.24753e+06	2.12873e+07	4.26944e+06	1.50282e+07	36021.6	14057.5	38808.4	58323.2	45643.5	47188.7	55775.2	51560.1	45477.8	1.41524e+06	1.56525e+06	1.49223e+06	-	-
pme1975	103	59.01	104.011	C3H4O4	[M-H]-	Malonic acid	Organic acids	Organic acids	141-82-2	3	6.82534e+07	7.03599e+07	7.06283e+07	1.04442e+07	1.52754e+07	1.08629e+07	2.57936e+06	2.88723e+06	1.18611e+06	847060	838347	1.37257e+06	1.87514e+06	1.82357e+06	2.97519e+06	1.93736e+07	2.12587e+07	1.96787e+07	C00383	ko00061,ko00240,ko00410,ko01100,ko01212
Wagn011658	653.38	397.14	654.383	C31H58O14	[M-H]-	1-Palmitoyl-Sn-Glycerol 3-O-Diglucoside	Lipids	Glycerol ester	-	2	606835	739566	887995	100966	176495	206667	9726.52	1187.77	3588.26	9809.86	7277.84	5757.21	12025.8	7645.77	13419.7	135125	134801	123533	-	-
mws0856	463.09	301.04	464.096	C21H20O12	[M-H]-	Quercetin-4'-O-glucoside (Spiraeoside)	Flavonoids	Flavonols	20229-56-5	2	2.06667e+06	1.11726e+06	9.62079e+06	1.7128e+06	7.55744e+06	8.2277e+06	2.48921e+06	604423	1.5715e+06	459536	337488	561924	270836	147473	207424	3.00256e+06	2.71484e+06	2.85485e+06	-	-
Zahp011321	228.23	228.24	227.225	C14H29NO	[M+H]+	N-Isobutyl Decanamide	Alkaloids	Alkaloids	73785-31-6	3	1.42515e+06	1.38797e+06	1.27657e+06	1.07763e+06	1.1321e+06	1.2691e+06	1.28096e+06	1.16497e+06	1.26322e+06	1.42842e+06	1.44394e+06	1.53624e+06	1.43266e+06	1.39083e+06	1.50539e+06	1.56064e+06	1.48022e+06	1.63737e+06	-	-
Lmhp010190	522.36	184.07	521.348	C26H52NO7P	[M+H]+	LysoPC 18:1(2n isomer)	Lipids	LPC	-	2	1.22284e+07	1.03307e+07	1.54333e+07	2.083e+07	2.51005e+07	1.52292e+07	616281	1.06336e+06	1.17352e+06	1.54635e+06	1.7189e+06	1.70713e+06	2.32466e+06	1.82233e+06	7.0854e+06	1.0484e+07	1.13862e+07	1.15121e+07	-	-
Lmqn008288	299.26	299.26	300.266	C18H36O3	[M-H]-	3-Hydroxyoctadecanoic Acid	Lipids	Free fatty acids	45261-96-9	3	9	9	9	690796	410889	390139	426550	452005	528709	104418	157737	168008	104962	103789	83238.7	259240	247825	234330	-	-
Lmbp000668	124.04	78.03	123.032	C6H5NO2	[M+H]+	Isonicotinic acid	Others	Vitamin	55-22-1	2	1.24052e+07	1.13767e+07	8.86933e+06	5.19768e+07	6.10973e+07	8.04508e+07	5.17372e+07	3.2005e+07	4.48801e+07	8.63275e+06	9.88749e+06	9.55505e+06	7.83361e+06	5.89602e+06	7.75844e+06	1.34556e+07	1.21767e+07	1.26764e+07	C07446	-
Lmsp008681	331.12	197.05	330.11	C18H18O6	[M+H]+	5-Hydroxy-7,8,4'-Trimethoxyflavanone	Flavonoids	Flavanones	-	3	38811.9	31610.2	70020	437108	249331	334113	339321	213705	457964	97246.7	149648	86394.4	88143.8	105446	90895.8	145245	152615	160737	-	-
mws0567	146.09	87.04	145.085	C5H11N3O2	[M+H]+	4-Guanidinobutyric acid	Organic acids	Organic acids	463-00-3	3	94494.1	112334	78147.9	414959	609263	745709	2.40738e+07	3.0406e+07	2.43567e+07	9.74285e+06	1.11668e+07	1.11635e+07	8.65542e+06	7.68958e+06	8.08724e+06	8.57768e+06	8.52159e+06	9.32165e+06	C01035	ko00330,ko01100
mws4053	455.35	455.35	456.36	C30H48O3	[M-H]-	3-Hydroxyurs-12-en-28-oic acid (Ursolic acid)*	Terpenoids	Triterpene	77-52-1	2	270894	270536	116480	57405.4	86737.9	959892	66471	46134.3	60298	192671	193239	269960	385436	250860	255348	258544	260389	237373	C08988	-
Wbmn010483	485.33	485.33	486.334	C30H46O5	[M-H]-	Cannabifolin D	Terpenoids	Triterpene	-	1	943293	256787	298806	3.39619e+07	2.80056e+07	2.73166e+07	2.44858e+07	2.7879e+07	2.75759e+07	7.81915e+06	1.20933e+07	9.48636e+06	5.8361e+06	1.26059e+07	8.30953e+06	1.41941e+07	1.47549e+07	1.33351e+07	-	-
pmn001606	309.28	309.28	310.287	C20H38O2	[M-H]-	Eicosenoic acid	Lipids	Free fatty acids	26764-41-0	3	1.71236e+07	1.66053e+07	1.8415e+07	2.50765e+07	2.30612e+07	19147981	1.82841e+07	1.75413e+07	1.6145e+07	1.71933e+07	1.80661e+07	1.75291e+07	1.76124e+07	2.039e+07	1.71302e+07	1.61095e+07	17758575	1.74008e+07	C16526	ko01040
mws1050	148.06	88.04	147.053	C5H9NO4	[M+H]+	O-Acetylserine	Amino acids and derivatives	Amino acids and derivatives	5147-00-2	3	322714	344630	430113	472352	830669	772140	1.46631e+06	1.62226e+06	1.50321e+06	586323	591688	729181	475226	442213	506680	632422	696969	648556	C00979	ko00270,ko00908,ko00920,ko01100,ko01110,ko01200,ko01230,ko04122
Hmgn001653	137.02	93.04	138.032	C7H6O3	[M-H]-	Protocatechualdehyde*	Others	Aldehyde compounds	139-85-5	1	1.02101e+06	869705	675837	452588	1.01837e+06	682732	2.74762e+06	3.47883e+06	2.58897e+06	3.98767e+06	3.77586e+06	3.81457e+06	4.26895e+06	4.00897e+06	4.01142e+06	3.06444e+06	2.81542e+06	2.80238e+06	C16700	ko00950
MWSmce177	221.09	133.03	222.089	C12H14O4	[M-H]-	Ethyl ferulate	Phenolic acids	Phenolic acids	4046-02-0	2	5503.45	37908.6	31620.2	16886.8	93048.8	28789.9	82516.1	112490	103983	277748	210886	412162	193872	222451	250824	180096	184037	198310	-	-
pmb3032	561.12	329.1	562.132	C26H26O14	[M-H]-	Tricin-7-O-(2''-Malonyl)rhamnoside	Flavonoids	Flavones	-	3	147680	245164	107260	37987.3	102602	31874.6	282931	264043	257932	136156	195967	192054	91747.4	132321	110984	216668	209693	231657	-	-
pme2589	159.03	87.04	160.037	C6H8O5	[M-H]-	2-Oxoadipic acid	Organic acids	Organic acids	3184-35-8	3	210013	913914	189850	853542	941171	999637	143926	152379	169244	199287	173213	199229	174989	197272	190587	304582	333546	333011	C00322	ko00300,ko00310,ko00380,ko00785,ko01100,ko01110,ko01210,ko01230,ko01240
Lmyp008961	239.07	211.07	238.063	C15H10O3	[M+H]+	1-Hydroxy-2-methylanthraquinone	Quinones	Anthraquinone	6268-09-3	3	159139	136649	183130	60577.5	137538	75986.3	60154.7	102975	76171.5	262659	202282	222496	181975	184547	222250	225959	215231	203934	-	-
Hmgn004693	371.11	327.03	372.121	C20H20O7	[M-H]-	8-Hydroxy-α-conidendrin	Lignans and Coumarins	Lignans	-	3	510171	355415	297244	68160.5	49726.9	75355.5	282011	314686	283390	550152	525453	464314	949021	766939	654181	361103	395931	394306	-	-
mws4193	167.07	121.03	168.079	C9H12O3	[M-H]-	Homovanillic alcohol; 4-Hydroxy-3-methoxyphenethanol	Phenolic acids	Phenolic acids	2380-78-1	2	123186	116696	95546.6	24630.7	52137.1	13689.4	58730.1	45010	46862.4	160510	203773	126391	283348	244915	217339	115053	124245	127016	-	-
pmn001610	307.26	307.26	308.272	C20H36O2	[M-H]-	Eicosadienoic acid*	Lipids	Free fatty acids	5598-38-9	1	565719	437891	540868	527468	225424	198031	354749	228629	231170	314822	235586	327660	347319	143920	277075	173609	172960	189155	C16525	ko01040
Lmmn013100	307.26	307.26	308.272	C20H36O2	[M-H]-	Ethyl linoleate*	Lipids	Free fatty acids	544-35-4	1	565719	437891	540868	527468	225424	198031	354749	228629	231170	314822	235586	327660	347319	143920	277075	173609	172960	189155	-	-
MWSHY0069	301.07	286.05	300.063	C16H12O6	[M+H]+	Hispidulin (5,7,4'-Trihydroxy-6-methoxyflavone)	Flavonoids	Flavones	1447-88-7	3	909678	896580	992886	363425	518175	445188	523062	553207	581029	5.2623e+06	5.15178e+06	4.89087e+06	7.82804e+06	6.81905e+06	7.01117e+06	4.13217e+06	4.57916e+06	4.34877e+06	C10058	-
mws1584	515.12	191.03	516.127	C25H24O12	[M-H]-	1,3-O-Dicaffeoylquinic Acid (Cynarin)	Phenolic acids	Phenolic acids	30964-13-7	1	51530	51222.6	55220.9	5.96203e+06	540621	2.60172e+06	3.05504e+06	244037	4.95093e+06	625568	849254	1889120	251260	235200	775193	1.24228e+06	1.29255e+06	1.37516e+06	C10445	-
Zbzp010481	335.26	335.26	334.251	C21H34O3	[M+H]+	1-(3,5-Dihydroxyphenyl)pentadecan-1-one	Quinones	Quinones	-	3	1.18087e+06	530461	384924	261471	1.66614e+06	502525	1.35148e+06	780485	1.98616e+06	725529	1.26016e+06	713340	1.01371e+06	682486	720895	1.83024e+06	1.85517e+06	1.68441e+06	-	-
Lmrn001951	181.05	135.04	182.058	C9H10O4	[M-H]-	(S)-2-Hydroxy-3-(4-Hydroxyphenyl)Propanoic Acid	Phenolic acids	Phenolic acids	23508-35-2	2	276424	385200	145077	830288	2.59895e+06	1.05479e+06	4.01483e+07	1.80078e+07	4.26664e+07	25855715	2.51714e+07	2.75705e+07	1.87682e+07	1.99754e+07	2.02812e+07	1.8486e+07	1.90135e+07	1.7188e+07	-	-
Zjxp110324	249.15	145.1	248.141	C15H20O3	[M+H]+	Isotelekin	Terpenoids	Sesquiterpenoids	-	3	49527.2	41808.9	64298.6	418605	2.36879e+06	456354	532126	896182	996295	403592	85026.6	208695	105045	37933	149014	447772	465121	419710	-	-
Lcsp000657	323.26	121.1	322.251	C20H34O3	[M+H]+	ent-16α,17,19-Trihydroxykaurane	Terpenoids	Ditepenoids	-	2	135978	179897	137906	47228.7	60644.9	48417.2	234161	239454	215637	732875	741792	628908	906608	715715	755751	448783	493227	489376	-	-
MWS20033	333.21	289.22	334.214	C20H30O4	[M-H]-	20-Carboxyarachidonic Acid	Lipids	Free fatty acids	79551-84-1	2	20083.7	15556	21542	397223	187655	105740	112957	202952	235720	21304	50639.4	81724.2	43532	74651.1	84927	90960.5	96061.8	100870	-	-
MWSslk194	222.04	148.05	221.032	C10H7NO5	[M+H]+	7-Hydroxy-4-methyl-8-nitrocoumarin	Lignans and Coumarins	Coumarins	19037-69-5	3	113080	173192	24300.1	92635.9	55060	26719.6	137143	209867	156217	256623	274302	279175	319499	328293	287564	229170	212950	235613	-	-
MWS3020	145.13	86.1	144.126	C7H16N2O	[M+H]+	N-Acetylcadaverine	Alkaloids	Alkaloids	32343-73-0	3	453000	676999	397401	263126	122221	373410	129125	1.83557e+06	145498	3.09294e+06	3.83894e+06	2.36603e+06	1.19898e+07	9.8352e+06	9.71276e+06	3.93514e+06	3.91755e+06	3.58528e+06	-	-
Hmqp006656	335.26	335.26	334.251	C21H34O3	[M+H]+	12-Hydroxyhydromethylabietate	Terpenoids	Ditepenoids	-	1	510300	475486	251522	544827	313270	538370	453246	470316	424503	657456	522512	596952	678414	643758	655807	789509	778485	716450	-	-
Zbzp007301	293.21	55.05	292.204	C18H28O3	[M+H]+	2-Methoxy-6-undecyl-1,4-benzoquinone	Quinones	Quinones	-	3	2.35889e+06	2.53153e+06	3.27867e+06	285936	2.00153e+06	480896	987905	4.8678e+06	888798	2.93558e+06	2.46707e+06	3.01653e+06	2.63089e+06	2.5105e+06	3.12634e+06	2.48489e+06	2.7377e+06	2.70119e+06	-	-
MWSmce294	209.11	153.05	208.11	C12H16O3	[M+H]+	Elemicin	Phenolic acids	Phenolic acids	487-11-6	3	163033	154504	100667	424035	493638	289175	457826	600838	514309	713788	592596	542387	474695	555157	396400	405659	381131	366284	C10451	-
Hahn001170	345.12	183.07	346.126	C15H22O9	[M-H]-	Aucubin	Terpenoids	Sesquiterpenoids	479-98-1	2	494578	517790	2.01435e+07	2.93741e+06	3.9776e+06	2.81006e+06	1.06773e+06	227617	650706	95778.8	92715.8	133316	44939.4	31244.2	32118.6	2.18497e+06	2.23877e+06	2.41093e+06	C09771	-
mws0628	121.03	92.03	122.037	C7H6O2	[M-H]-	4-Hydroxybenzaldehyde	Others	Aldehyde compounds	123-08-0	3	2.21374e+06	2.58749e+06	1.61896e+06	1.15655e+06	2.66753e+06	1.19002e+06	1.42413e+06	5.89988e+07	1.43448e+06	1.53174e+06	1.59449e+06	1.60504e+06	2.02023e+06	1.63322e+06	1.94195e+06	4.67846e+06	4.89733e+06	4.41454e+06	C00633	ko01100
Wafn015217	327.29	59.01	328.298	C20H40O3	[M-H]-	Hydroxyicosanoic Acid	Lipids	Free fatty acids	-	1	1.31763e+06	761887	607266	897388	698986	819471	909854	585661	802896	716933	967936	593593	714884	893707	611750	1.12339e+06	1.23433e+06	1.22694e+06	-	-
Labp006185	533.13	285.08	532.122	C25H24O13	[M+H]+	Acacetin-7-O-(6''-malonyl)glucoside	Flavonoids	Flavones	-	3	726072	532209	2.85376e+06	81951.1	24686	66064.2	9	9	9	20347.4	78509.4	42634.8	52581.2	25223.3	3012.15	245195	255026	271636	-	-
Lmbn005172	165.06	119.05	166.063	C9H10O3	[M-H]-	2,6-Dimethoxybenzaldehyde	Others	Aldehyde compounds	3392-97-0	1	56136.3	132922	20898.7	56138	271764	69945.6	1.78813e+06	3.06684e+06	2.02779e+06	2.50159e+06	2.58225e+06	2.28647e+06	2.43847e+06	2.2401e+06	2.15458e+06	1.44719e+06	1.3993e+06	1.54846e+06	-	-
Lmfp009701	353.27	261.22	352.261	C21H36O4	[M+H]+	Glycerol 9(E),11(Z),13(E)-octadecatrienoyl ester*	Lipids	Glycerol ester	-	1	4.4515e+07	4.30552e+07	2.41501e+07	2.50324e+06	4.35092e+06	5.4675e+06	848075	754756	857984	2.65466e+06	2.05667e+06	2.15314e+06	2.10548e+06	3.10885e+06	2.42751e+06	9.22731e+06	9.50523e+06	8.58174e+06	-	-
mws0206	103.04	57.04	104.047	C4H8O3	[M-H]-	2-Hydroxybutyric Acid*	Organic acids	Organic acids	3347-90-8	1	444531	538441	311884	609585	585724	542300	2.58987e+06	851042	1.30529e+06	3.47563e+06	4.50687e+06	2.2763e+06	8.50572e+06	7.25149e+06	6.05494e+06	2.41018e+06	2.67359e+06	2.5732e+06	C05984	ko00640
mws0574	103.04	57.04	104.047	C4H8O3	[M-H]-	2-Hydroxyisobutyric acid*	Organic acids	Organic acids	594-61-6	1	444531	538441	311884	609585	585724	542300	2.58987e+06	851042	1.30529e+06	3.47563e+06	4.50687e+06	2.2763e+06	8.50572e+06	7.25149e+06	6.05494e+06	2.41018e+06	2.67359e+06	2.5732e+06	C21297	-
MWSslk183	255.07	181.07	254.058	C15H10O4	[M+H]+	7,8-Dihydroxy-4-phenylcoumarin	Lignans and Coumarins	Coumarins	842-01-3	3	79627.9	111905	57519.6	127050	130707	100059	234338	251399	148577	285083	215505	273922	290964	238895	254692	312940	284696	311090	-	-
MWS2417	167.03	121.03	168.042	C8H8O4	[M-H]-	3-Hydroxymandelate	Organic acids	Organic acids	17119-15-2	3	45164.9	48585.6	49946.3	82732	26397.6	122582	2.85258e+06	2.12661e+06	3.12639e+06	1.35318e+06	1.48543e+06	1.48177e+06	732381	786290	885254	806913	895146	842997	-	-
mws0193	190.12	84.08	189.111	C7H15N3O3	[M+H]+	L-Homocitrulline	Amino acids and derivatives	Amino acids and derivatives	1190-49-4	3	3.47127e+06	1.6364e+06	2.83502e+06	1.24906e+06	3.21337e+06	479488	1.22528e+06	318980	1.0313e+06	2.07527e+06	2.04236e+06	2.22205e+06	2.74506e+06	2.68665e+06	3.01097e+06	2.61179e+06	2.3984e+06	2.37999e+06	C02427	-
Zbfn008708	501.31	279.23	502.314	C26H46O9	[M-H]-	1-O-Linoleoyl-(6-O-Hydroxyethyl-D-Glucose)	Lipids	Free fatty acids	-	2	53001.8	26919.8	17368.4	39875.7	9260.69	5682.05	6559.47	11455.2	13556.9	64288.4	81326.5	80074	65497	56651.5	46415.1	8408.55	7943.2	8821.63	-	-
Lmyp003387	192.07	146.06	191.058	C10H9NO3	[M+H]+	2-Oxo-3,4-dihydro-1H-quinoline-3-carboxylic acid	Alkaloids	Quinoline alkaloids	246867-17-4	3	3.90794e+06	4.8148e+06	5034125	646994	1.34243e+06	473860	1.04862e+06	797959	1.05074e+06	1.85814e+06	2.20039e+06	2.236e+06	2.91603e+06	2.58668e+06	2.64758e+06	2.50275e+06	2.42952e+06	2.25763e+06	-	-
MWS201381	292.13	188.07	291.122	C14H17N3O4	[M+H]+	Ser-Trp	Amino acids and derivatives	Amino acids and derivatives	94421-70-2	3	4.78312e+06	3.84903e+06	9.23235e+06	400384	1.90733e+06	466636	1.40144e+06	1.62299e+06	1.46233e+06	1.49691e+06	1.57275e+06	2.21675e+06	1.34337e+06	781215	2.23146e+06	2.09207e+06	2.29429e+06	2.29532e+06	-	-
Wbtn007183	315.05	300.03	316.058	C16H12O7	[M-H]-	methyl 4,8-dihydroxy-6-methoxy-9-oxo-9H-xanthene-3-carboxylate	Flavonoids	Other Flavonoids	-	3	175622	567746	336765	71859.2	61937.3	83957.2	262700	273756	256648	1.69299e+06	1.31683e+06	1.60557e+06	1.80278e+06	1.74808e+06	1.55014e+06	1.09721e+06	1.19793e+06	1.09299e+06	-	-
MWSHY0146	285.08	242.06	284.068	C16H12O5	[M+H]+	Glycitein	Flavonoids	Isoflavones	40957-83-3	2	2.14124e+06	1.66119e+06	1.13212e+06	115375	125619	183349	102686	172079	148744	2.48774e+06	3.02844e+06	2.79099e+06	6.17017e+06	5.01065e+06	6.57512e+06	3.22689e+06	3.51718e+06	3.20424e+06	C14536	ko00943,ko01110
Lmhp011562	353.27	261.22	352.261	C21H36O4	[M+H]+	1-α-Linolenoyl-glycerol*	Lipids	Glycerol ester	-	1	4.22261e+07	3.90892e+07	2.54246e+07	2.40791e+06	4.37138e+06	5.82172e+06	851458	763358	871790	2.51319e+06	2.22549e+06	1.92035e+06	1.93357e+06	3.2873e+06	2.33911e+06	9.44737e+06	9.24605e+06	8.53749e+06	-	-
pme0241	123.04	79.05	122.037	C7H6O2	[M+H]+	Benzoic acid	Phenolic acids	Phenolic acids	65-85-0	3	4.91926e+06	7.2822e+06	1.97774e+06	1.02476e+06	1.43834e+06	1.3498e+06	2.30277e+06	6.27421e+06	2.97426e+06	2.54524e+07	2.73691e+07	2.76459e+07	2.16729e+07	3.19946e+07	2.83524e+07	1.62284e+07	1.73091e+07	1.80263e+07	C00180	ko00996,ko01100,ko01110
Lmnn004130	553.21	505.19	554.215	C30H34O10	[M-H]-	Lappaol C	Lignans and Coumarins	Lignans	64855-00-1	3	72727.1	49174.5	61590.6	36033.8	13025.6	52594.8	133803	197302	102843	193458	203365	53118.1	134114	56943.2	160820	172509	159205	176160	C17686	-
Wbjp001169	221.09	130.06	220.085	C11H12N2O3	[M+H]+	o-Carboxy-5-hydroxytryptamine	Alkaloids	Alkaloids	-	3	5.79815e+06	5.36625e+06	1.26548e+07	2.588e+06	1.42722e+06	1.26936e+06	1.39933e+06	479824	1.52355e+06	6.56694e+06	6.64969e+06	8.25709e+06	8.71884e+06	6.46205e+06	6.0316e+06	5.50538e+06	4.95967e+06	5.17419e+06	-	-
pmb3053	523.12	329.2	524.132	C27H24O11	[M-H]-	Tricin-4'-O-eudesmic acid	Flavonoids	Flavones	-	3	481166	465203	40453.8	22932.8	8111.48	18780.3	32906.3	7991.83	17995.1	1.03543e+06	577003	301493	358717	335571	313861	266365	240095	249532	-	-
mws0361	253.22	235.21	254.225	C16H30O2	[M-H]-	Palmitoleic Acid*	Lipids	Free fatty acids	373-49-9	2	37643.6	34361	17526.2	18126.6	137664	16374.8	66062	64568.3	82269.5	122770	120573	111735	141868	110660	112791	124665	137973	135090	C08362	ko00061,ko01100
pme2268	138.06	94.07	137.048	C7H7NO2	[M+H]+	Trigonelline	Alkaloids	Pyridine alkaloids	535-83-1	1	3.03947e+07	1.33003e+07	2.70143e+07	8.1409e+06	9.98826e+06	1.70508e+07	3.64457e+06	2.49258e+06	2.97682e+06	8.37471e+06	7.17383e+06	7.58044e+06	7.3493e+06	6.57528e+06	5.7474e+06	8.64577e+06	7.81762e+06	8.02251e+06	C01004	ko00960
Qmyp101233	225.15	67.06	224.141	C13H20O3	[M+H]+	Blumenol A(ISO)	Terpenoids	Sesquiterpenoids	-	3	322298	409753	227486	347469	98370	271319	351535	561674	428292	364259	404057	456538	424529	357844	404725	444438	404051	442565	-	-
mws1589	503.16	179.06	504.169	C18H32O16	[M-H]-	D-Panose*	Others	Saccharides	33401-87-5	3	1.50031e+06	1.10526e+06	1.18002e+06	473406	561942	878946	12886.6	10544.4	27104.7	19511	147244	33903.7	60839.5	30823.3	95184.8	750985	813417	831668	C00713	-
Wcdp005073	318.3	60.05	317.293	C18H39NO3	[M+H]+	4-Hydroxysphinganine; Phytosphingosine	Lipids	Sphingolipids	554-62-1	2	655386	500764	2.01385e+06	1.48397e+07	1.56529e+07	9.22832e+06	4.07418e+07	3.07279e+07	3.53226e+07	2.16996e+07	2.25211e+07	2.21545e+07	2.94806e+07	2.75111e+07	2.51649e+07	2.1337e+07	2.01829e+07	2.24454e+07	C12144	ko00600,ko01100
pme0256	151.03	108.02	152.033	C5H4N4O2	[M-H]-	Xanthine	Nucleotides and derivatives	Nucleotides and derivatives	69-89-6	1	775525	582235	231566	11808.4	750055	24397.1	2.25542e+06	1.4819e+06	2.48146e+06	4.14168e+06	4.51849e+06	4.22158e+06	5.24859e+06	4.697e+06	4.98447e+06	3.92898e+06	3.53422e+06	3.70912e+06	C00385	ko00230,ko00232,ko01100,ko01110,ko01232
Lcsp013328	324.29	62.06	323.282	C20H37NO2	[M+H]+	linoleoyl ethanolamine	Lipids	LPE	68171-52-8	2	8.27988e+06	7.87268e+06	7.25929e+06	9.35285e+06	9.268e+06	8.62408e+06	2.50434e+07	3.34304e+07	2.81387e+07	3.90149e+07	4.70969e+07	3.70521e+07	4.58738e+07	3.7974e+07	4.05345e+07	2.68869e+07	2.7287e+07	2.96357e+07	-	-
pmf0367	177.02	89	178.027	C9H6O4	[M-H]-	5,7-Dihydroxychromone	Others	Chromone	31721-94-5	3	148905	159258	87886.6	120509	159546	157022	420737	405310	496775	531163	479817	469083	492425	460464	400866	324673	310887	345446	C09001	-
pmf0096	88.99	70.98	89.9953	C2H2O4	[M-H]-	Oxalic acid	Organic acids	Organic acids	144-62-7	3	168560	328341	203517	660870	1.68629e+06	586057	1.30544e+07	2.63573e+06	1.33935e+07	9.05705e+06	9.33846e+06	9.832e+06	1.04665e+07	9.1898e+06	8.995e+06	7.86541e+06	7.21309e+06	7.15545e+06	C00209	ko00230,ko00630,ko01100
Wbmp003697	209.15	55.05	208.146	C13H20O2	[M+H]+	(R)-3-(3'-Hydroxybutyl)-2,4,4-trimethylcyclohexa-2,5-dienone	Terpenoids	Sesquiterpenoids	-	1	7.55461e+06	7.28651e+06	7.27332e+06	9	9	9	495882	488621	379593	342249	313339	367374	197665	270502	246818	1.97905e+06	2.13486e+06	2.19654e+06	-	-
mws0275	133.01	71.01	134.022	C4H6O5	[M-H]-	L-Malic acid	Organic acids	Organic acids	97-67-6	1	7.19648e+07	4.15456e+07	100674470	7.0306e+07	4.19633e+07	3.82932e+07	2.71273e+06	2.93347e+06	1.09472e+06	1.62363e+06	1.55089e+06	1.74811e+06	9	9	9	2.4822e+07	2.7251e+07	2.72802e+07	C00149	ko00020,ko00620,ko00630,ko00710,ko01100,ko01110,ko01200
mws0219	132.03	88.04	133.037	C4H7NO4	[M-H]-	L-Aspartic Acid	Amino acids and derivatives	Amino acids and derivatives	56-84-8	1	5.02243e+06	4.41305e+06	3.29856e+06	417008	3.09682e+06	499091	1.48792e+06	265477	1.33437e+06	8.73715e+06	9.01928e+06	8.28921e+06	9.55491e+06	1.16364e+07	1.28154e+07	8.66053e+06	8.72031e+06	7.91161e+06	C00049	ko00220,ko00250,ko00260,ko00261,ko00270,ko00300,ko00340,ko00410,ko00460,ko00470,ko00710,ko00760,ko00770,ko00970,ko00999,ko01100,ko01110,ko01200,ko01210,ko01230,ko01240,ko02010
pme3827	198.08	152.07	197.069	C9H11NO4	[M+H]+	3,4-Dihydroxy-L-phenylalanine (L-Dopa)	Amino acids and derivatives	Amino acids and derivatives	59-92-7	3	1.24054e+07	3.15302e+06	1.73308e+07	2.51986e+06	3.66137e+06	6.10628e+06	6.45326e+06	6.00965e+06	5.65367e+06	1.01655e+07	1.00449e+07	9.16851e+06	9.21628e+06	8.50887e+06	1.08673e+07	9.1721e+06	8.37716e+06	9.23346e+06	C00355	ko00350,ko00950,ko00965,ko01100,ko01110
mws0976	243.06	153.03	244.07	C9H12N2O6	[M-H]-	β-Pseudouridine	Nucleotides and derivatives	Nucleotides and derivatives	1445-07-4	1	3.43047e+06	3.18132e+06	1.30031e+07	264067	1.74845e+06	334463	1.77742e+06	2.17411e+06	1.28991e+06	999451	860778	937372	891229	615790	1.25372e+06	4.14163e+06	3.92036e+06	3.72151e+06	C02067	ko00240,ko01100
Lmhn003439	367.1	193.06	368.111	C17H20O9	[M-H]-	Phellodenol H	Lignans and Coumarins	Coumarins	917092-48-9	1	404869	650372	276412	1.84418e+07	4.59433e+06	1.59062e+07	2.17223e+06	1.32099e+06	2.69729e+06	904243	895050	1.20194e+06	238149	196951	451969	2.88813e+06	3.21481e+06	3.07644e+06	-	-
ML10171848	147.03	85.03	148.037	C5H8O5	[M-H]-	D-Arabinono-1,4-lactone	Others	Saccharides	2782-09-4	3	7.08239e+06	2.32278e+06	1.36041e+06	3.92616e+06	1.04188e+07	4.7554e+06	2.42904e+06	3.37414e+06	6.0021e+06	1.68386e+06	4.83338e+06	5.25125e+06	3.91798e+06	3.64256e+06	3.95485e+06	4.58851e+06	4.88822e+06	5.10798e+06	C00652	ko00053,ko01100
Lmjp004702	183.07	137.06	182.058	C9H10O4	[M+H]+	2,4-Dihydroxy-6-methoxyacetophenone	Others	Ketone compounds	3602-54-8	3	181490	242317	121355	59395.7	106384	80520.8	109618	175954	147152	192727	197805	188896	196694	143564	168261	140014	141259	154102	-	-
MWSslk120	208.1	120.08	207.089	C11H13NO3	[M+H]+	N-Acetyl-DL-phenylalanine	Amino acids and derivatives	Amino acids and derivatives	2901-75-9	1	10056555	19148105	8127270	1619155	3.5362e+06	505405	10833985	23593545	10763955	47048355	49188740	1.33059e+07	82298865	78171360	66382780	35370170	33829450	37634930	-	-
MWSmce016	138.05	78.03	137.048	C7H7NO2	[M+H]+	Nicotinic Acid Methyl Ester(Methyl Nicotinate)	Alkaloids	Pyridine alkaloids	93-60-7	3	2.60243e+06	3.93348e+06	524296	9.34409e+06	1.22597e+06	9.71915e+06	155232	177844	201459	188414	176347	212497	155147	158938	138418	401034	387509	360567	-	-
HX1210	393.21	337.14	392.199	C25H28O4	[M+H]+	Erythrabssin II	Lignans and Coumarins	Lignans	-	3	12998.9	12591.7	51075.9	39855.1	124990	28328.7	129575	172051	179940	84307.3	83443.5	99933.6	73375.1	93773.9	64676.2	78807.7	71807.1	71978.6	-	-
pmf0443	249.15	185.12	248.141	C15H20O3	[M+H]+	Parthenolide	Terpenoids	Sesquiterpenoids	20554-84-1	3	60700.6	63986.9	35418.2	9	9	9	68421.6	60529.3	62303.9	409264	497680	348789	618585	496459	539508	261922	289040	286779	C07609	-
MWSHC2025	217.1	144.08	216.09	C12H12N2O2	[M+H]+	(R)-1,2,3,4-Tetrahydro-3-carboxy-2-carboline	Alkaloids	Alkaloids	72002-54-1	3	349359	274451	251457	386027	5.05469e+06	783841	5.13776e+06	2.26419e+07	4.56676e+06	4.57449e+06	4.09401e+06	4.24341e+06	4.21613e+06	4.15207e+06	4.27507e+06	3.87703e+06	4.22231e+06	4.29335e+06	-	-
MWS0552	239.2	223.03	240.209	C15H28O2	[M-H]-	Cis-10-Pentadecenoic Acid(C15:1)	Lipids	Free fatty acids	84743-29-3	2	312480	443734	326976	319244	2.34973e+06	2.11749e+06	893661	550265	329172	327460	260591	289420	1.47802e+06	1.61632e+06	765448	3.49789e+06	3.75093e+06	3.37535e+06	-	-
Labn003679	327.11	147.05	328.116	C15H20O8	[M-H]-	(E)-caffeyl alcohol 4-O-β-D-glucopyranoside	Phenolic acids	Phenolic acids	-	2	644139	751108	1.72775e+06	4.88359e+06	4.82819e+06	5.3568e+06	34210	30960.4	23825.7	144392	133304	141519	110711	65819.9	174092	1.00516e+06	1.12017e+06	1.0686e+06	-	-
Wcgn002300	353.09	233.05	354.095	C16H18O9	[M-H]-	Isobiflorin	Others	Ketone compounds	152041-16-2	3	1.21531e+06	2.91387e+06	1.08172e+06	11106.2	23133.8	13310.8	53892	36674.6	36160.1	985143	2.08925e+06	1.17595e+06	1.44104e+06	2.38842e+06	936174	765159	811801	728642	-	-
Yygn003903	431.23	431.22	432.236	C21H36O9	[M-H]-	dictamnoside A	Terpenoids	Sesquiterpenoids	-	2	5.52214e+06	4.83161e+06	3.33898e+06	8.04437e+06	3.70446e+06	6.91707e+06	4.51708e+06	5.22974e+06	4.78914e+06	5.60324e+06	5.18707e+06	5.27524e+06	5.02431e+06	4.82715e+06	4.41672e+06	5.06037e+06	4.89518e+06	4.54663e+06	-	-
pmp001270	494.32	184.07	493.317	C24H48NO7P	[M+H]+	LysoPC 16:1*	Lipids	LPC	76790-27-7	2	6.18796e+06	6.6076e+06	2.64888e+06	2.36514e+06	3.47029e+06	3.78321e+06	37293.6	8.22416e+06	91514.1	355473	35047.8	153705	128573	41951	1.398e+06	2.11646e+06	2.35447e+06	2.20081e+06	-	-
Qmgp082708	455.2	409.21	454.199	C26H30O7	[M+H]+	Obacunone(ISO)	Terpenoids	Ditepenoids	-	3	119699	80586.8	37663.4	15128	24099.3	32777.9	32546.1	13004.3	32909.4	848223	803196	1.00095e+06	943533	996617	1.1264e+06	755187	694540	683421	-	-
Lmhp009187	440.28	299.26	439.27	C20H42NO7P	[M+H]+	LysoPE 15:0*	Lipids	LPE	-	3	463996	640514	867436	200509	228560	132950	14330.8	59458.9	13904.9	5713.35	9838.37	4845.2	22095.2	7600.24	24763.3	211546	235202	228892	-	-
Hmyp002656	222.08	130.06	221.069	C11H11NO4	[M+H]+	Methyl dioxindole-3-acetate	Alkaloids	Plumerane	57061-18-4	2	286429	362374	187089	106794	116872	71995	519449	566972	394516	1.96647e+06	2.31035e+06	2.81202e+06	2.42104e+06	2.03271e+06	1.37775e+06	883389	959389	980990	-	-
mws1080	341.11	179.06	342.116	C12H22O11	[M-H]-	Galactinol	Others	Saccharides	3687-64-7	3	1.71395e+06	1.42429e+06	1.26228e+06	1.43785e+06	943013	900980	8243.14	9105.2	17769	26954.4	45427	32714.9	12146.1	9541.77	27742	1.50181e+06	1.55647e+06	1.39722e+06	C01235	ko00052,ko01100
MWSmce210	183	67.02	184.001	C7H4O6	[M-H]-	Chelidonic acid	Organic acids	Organic acids	99-32-1	3	106082	99491.4	70919.3	40563	150065	239853	76130.8	42091.7	58163.2	65682.2	32735.6	62600.1	40261.3	61419.5	74863.3	63666.2	65821.2	70769	C08476	-
pme2828	140.03	98.96	139.027	C6H5NO3	[M+H]+	4-Nitrophenol	Phenolic acids	Phenolic acids	100-02-7	3	8.6427e+06	8.64653e+06	3.70424e+06	3.58175e+06	6.824e+06	8.21803e+06	3.5955e+06	3.60448e+06	3.66874e+06	3.7449e+06	3.75801e+06	3.7727e+06	3.98652e+06	3.84164e+06	3.76476e+06	4.03224e+06	3.73189e+06	3.63196e+06	C00870	-
mws0277	191.06	85.03	192.063	C7H12O6	[M-H]-	Quinic Acid	Organic acids	Organic acids	77-95-2	2	2.60686e+07	2.52098e+07	2.30978e+07	5.32961e+07	5.2686e+07	6.27726e+07	462084	325018	629742	546001	352331	421608	452386	428324	330592	8.06481e+06	8.71188e+06	8.98223e+06	C00296	ko00400,ko01100
HJAP057	315.09	282.06	314.079	C17H14O6	[M+H]+	Dihydroxy-dimethoxyflavone*	Flavonoids	Flavones	-	2	386762	193610	218433	3.60877e+06	4.15395e+06	4.43153e+06	3.89849e+06	4.25606e+06	3.73622e+06	1.80419e+06	1.84798e+06	3.05312e+06	1.21263e+06	1.26034e+06	1.2838e+06	1.78892e+06	1.97613e+06	1.8109e+06	-	-
pmf0248	403.36	373.31	402.35	C27H46O2	[M+H]+	Delta-Tocopherol	Others	Vitamin	119-13-1	3	275387	283145	236103	288085	288120	208083	268622	252516	247160	239577	233448	222580	215144	279766	256474	284728	282417	257421	C14151	ko00130,ko01100,ko01110,ko01240
Zmmp003443	334.14	188.07	333.132	C16H19N3O5	[M+H]+	Bestim	Amino acids and derivatives	Amino acids and derivatives	66471-20-3	1	1.7548e+07	1.86244e+07	1.94933e+07	1.02747e+07	1.11924e+07	5.54114e+06	293662	55015	307740	1.40274e+06	972949	1.1085e+06	2.52687e+06	2.00117e+06	3.09047e+06	6.72242e+06	7.04094e+06	7.5015e+06	-	-
Lacp001298	168.1	91.05	167.095	C9H13NO2	[M+H]+	4-Hydroxy-3-methoxy-β-phenethylamine	Alkaloids	Phenolamine	-	3	506925	46983.8	901805	8520.14	63477.6	194836	224896	304395	406826	809214	800743	1.06414e+06	228976	439101	520006	522901	470107	484697	-	-
Wasn002902	355.07	209.03	356.074	C15H16O10	[M-H]-	O-p-Coumaroylgalactaric acid	Phenolic acids	Phenolic acids	-	2	541950	239117	1.2925e+06	93957.3	305952	373644	232283	180276	243179	610669	469159	533674	296427	237190	314010	415755	374050	384638	-	-
Zmdp002216	261.14	86.1	260.137	C11H20N2O5	[M+H]+	L-γ-Glutamyl-L-leucine	Amino acids and derivatives	Amino acids and derivatives	2566-39-4	1	2.32456e+07	2.65744e+07	2.00563e+07	1.14559e+06	6.26003e+06	1.41341e+06	707979	112271	660666	6.28269e+06	5.08609e+06	6.59855e+06	1.23796e+07	8.72654e+06	1.36731e+07	1.35613e+07	1.23486e+07	12328718	-	-
Hmcp009963	180.14	123.07	180.138	C11H18NO+	[M]+	Candicine	Alkaloids	Phenolamine	6656-13-9	2	1.37987e+06	2.18998e+06	1.97168e+06	1.86573e+06	1.54706e+06	1.64531e+06	935852	1.01368e+06	577282	528590	511542	778703	386532	581938	1.02053e+06	962814	879345	872848	C10575	-
Latp006670	249.15	185.13	248.141	C15H20O3	[M+H]+	Telekin*	Terpenoids	Sesquiterpenoids	6752-90-5	3	101470	177614	109753	256088	627643	371549	774683	1.06935e+06	649370	162248	255483	196978	210458	172903	41868.8	257336	230879	239764	-	-
pme3381	165.06	106.04	166.063	C9H10O3	[M-H]-	3-Hydroxyphenylacetic Acid Methyl Ester	Phenolic acids	Phenolic acids	42058-59-3	3	99522.9	79604.7	21582	53220.8	72069.7	134345	305333	589496	305190	317820	347692	396256	306078	312091	415031	219570	212275	196754	-	-
Ybmn004904	137.02	93.04	138.032	C7H6O3	[M-H]-	p-hydroxy-benzoic acid	Phenolic acids	Phenolic acids	-	1	3.09571e+06	3.4605e+06	3.34151e+06	192847	386255	328622	2.60858e+06	2.95883e+06	2.41987e+06	1.10658e+07	1.13174e+07	1.04964e+07	1.3445e+07	1.47957e+07	1.33429e+07	8.35624e+06	7.59366e+06	7.60548e+06	-	-
Yshs000041	459.23	295.22	460.246	C26H36O7	[M-H]-	Vibsanin J	Terpenoids	Ditepenoids	-	2	2.41471e+06	2.15199e+06	1.79576e+06	1.28095e+06	1.39445e+06	1.83522e+06	1.89172e+06	3.21412e+06	1.8201e+06	1.53761e+06	1.89504e+06	1.83664e+06	1.42787e+06	1.29718e+06	1.51939e+06	1.89984e+06	1.82753e+06	1.70089e+06	-	-
MWS4533	149.06	105.07	150.068	C9H10O2	[M-H]-	2-Phenylpropionic Acid	Organic acids	Organic acids	7782-26-5	2	10615.9	3453.56	3557.86	7699.21	3189.19	3177.45	28213.8	30400.1	37479.1	39389.3	47932.7	30325.7	27510.4	27115.6	34322.5	25188.4	26160.3	28089.1	-	-
Wcdn000434	341.11	59.01	342.116	C12H22O11	[M-H]-	5-{[3,4-dihydroxy-2,5-bis(hydroxymethyl)oxolan-2-yl]oxy}-2-(hydroxymethyl)oxane-2,3,4-triol	Others	Saccharides	-	3	7.07149e+06	8.29822e+06	6.76148e+06	6.31454e+06	3.17937e+06	3.46953e+06	71761.2	43239.6	103702	82359	164747	144972	89262	71298.5	121935	6.28496e+06	6.94587e+06	6.92114e+06	-	-
Wcsn010224	277.22	277.22	278.225	C18H30O2	[M-H]-	(5Z,10E)-14-hydroxy-2,6,10-trimethylpentadeca-2,5,10-trien-4-one	Others	Others	-	3	1.24782e+08	1.22525e+08	9.11026e+07	3.7136e+07	5.3351e+07	4.72194e+07	8.24016e+07	8.03855e+07	7.79752e+07	1.41603e+08	1.46394e+08	1.37303e+08	165264491	9.6345e+07	1.46563e+08	1.12379e+08	1.12455e+08	1.23648e+08	-	-
Zmgn000447	184.98	78.96	185.993	C3H7O7P	[M-H]-	3-Phospho-D-glyceric acid	Others	Saccharides	820-11-1	3	4.22878e+06	3.67673e+06	1.46709e+06	1.5093e+06	1.13081e+06	1.6932e+06	33575.1	40946.6	18497.9	51482.8	76667.9	67588.3	100830	80043.1	116154	695075	756585	773929	C00197	ko00010,ko00030,ko00260,ko00270,ko00561,ko00630,ko00710,ko01100,ko01110,ko01200,ko01230,ko01240
Zaxn005783	315.2	315.2	316.24	C21H32O2	[M-H]-	Methyl neoabietate	Terpenoids	Ditepenoids	3310-97-2	2	1.6962e+07	1.66436e+07	1.62602e+07	5.67283e+06	3.4217e+06	1.11732e+07	1.06671e+07	3.55242e+07	9.67519e+06	1.14575e+07	1.01258e+07	1.01941e+07	1.10176e+07	1.03401e+07	9.85077e+06	1.06907e+07	1.19329e+07	1.15535e+07	-	-
Lazn004796	391.14	343.12	392.147	C20H24O8	[M-H]-	Demethyl-erythro-Guaiacylglycerol β-Sinapyl Ether	Lignans and Coumarins	Lignans	-	3	20005	129730	92477.2	106503	207793	129759	1.47525e+06	4.24688e+06	1.14906e+06	8.4758e+06	9.64522e+06	6.09139e+06	1.12815e+07	1.24033e+07	7.59467e+06	3.21139e+06	2.9919e+06	2.87867e+06	-	-
MWSHY0128	343.12	313.08	342.11	C19H18O6	[M+H]+	5,7,8,4'-Tetramethoxyflavone*	Flavonoids	Flavones	6601-66-7	3	928701	996528	983446	912614	882373	830394	879658	941340	935894	1.1627e+06	1.0598e+06	1.13447e+06	1.21618e+06	1.21172e+06	1.16645e+06	954300	1.04867e+06	951960	-	-
mws0919	431.1	285.04	432.106	C21H20O10	[M-H]-	Kaempferol-3-O-rhamnoside (Afzelin)(Kaempferin)	Flavonoids	Flavonols	482-39-3	3	67779.5	24162.7	240556	4347.77	20141.7	9555.58	188203	84306.2	153694	564089	511531	896761	231696	124471	2.02004e+06	318295	309725	344608	C16911	ko00944
pme0534	195.05	75.01	196.058	C6H12O7	[M-H]-	Gluconic acid	Others	Saccharides	526-95-4	1	1.04408e+07	8.32584e+06	1.02405e+07	4.40434e+07	9.16034e+07	7.1619e+07	705079	824715	624705	1.26818e+06	1.00486e+06	1.22035e+06	1.31975e+06	1.20465e+06	1.61741e+06	6.42193e+06	7.12573e+06	6.54524e+06	C00257	ko00030,ko01100,ko01110,ko01200
Zmzn000079	199	78.96	200.009	C4H9O7P	[M-H]-	D-Erythrose-4-phosphate	Others	Saccharides	585-18-2	3	26740.6	27800.9	22487.6	37747.9	101875	31216.4	247984	34534.2	267787	107472	108288	133801	95105.8	90437.7	129485	107033	104050	95930	C00279	ko00030,ko00400,ko00710,ko00750,ko01100,ko01110,ko01200,ko01230,ko01240
mws0072	433.11	271.06	432.106	C21H20O10	[M+H]+	Apigenin-5-O-glucoside	Flavonoids	Flavones	28757-27-9	2	1.38122e+06	1035420	1.45435e+06	1.1447e+06	788770	1.33503e+06	72203.2	73890.7	130390	444701	305330	1142905	296980	741930	266920	537545	590048	534768	-	-
Lmyn000160	237.06	87.01	238.069	C8H14O8	[M-H]-	Mucic acid Dimethyl Ester	Phenolic acids	Phenolic acids	-	3	674963	582599	879213	455970	1.20222e+06	896491	159205	179511	155344	82651.1	79157.8	106404	343436	140053	195322	319827	297819	286294	-	-
Lmmp004510	829.18	271.06	828.175	C38H36O21	[M+H]+	Apigenin-7-O-[2''-O-(2'''-Sinapoyl)glucuronyl]glucuronide	Flavonoids	Flavones	-	2	1.25337e+07	9.33489e+06	30770145	16834.3	18340	10005	14941.6	10005	6670	5.3935e+06	3.46276e+06	4.79605e+06	1.78023e+06	1.48073e+06	1.75525e+06	4.98749e+06	5.30801e+06	5.58681e+06	-	-
HJN083	521.2	359.15	522.21	C26H34O11	[M-H]-	Lariciresinol-4'-O-glucoside	Lignans and Coumarins	Lignans	143663-00-7	3	354358	315453	564597	512905	411212	2.16433e+06	68161.7	50721.9	24501.9	51857.9	47484.8	74971.3	54665.1	28188.9	19363.6	293180	324178	295589	-	-
Lmmn004685	343.16	328.13	344.162	C20H24O5	[M-H]-	Nectandrin B	Lignans and Coumarins	Lignans	74683-16-2	3	56007.9	51499.3	40771.9	76909.1	53544	63625.1	144047	102366	99094.2	150676	141338	129065	183466	176406	146690	135410	150581	138433	-	-
Wcfn003424	337.09	191.06	338.1	C16H18O8	[M-H]-	Coumaroyl Quinic Acid	Others	Others	-	3	410595	244474	341176	1.47536e+07	2.28508e+06	3.79269e+06	155209	193542	172380	157574	150491	120019	109806	101960	796637	1.04442e+06	1.16963e+06	1.12138e+06	-	-
MWSmce264	153.06	123.05	154.063	C8H10O3	[M-H]-	Hydroxytyrosol	Phenolic acids	Phenolic acids	10597-60-1	3	19113.7	13340	48493.3	9	9	9	2.2134e+06	13734.1	2.2016e+06	3.92299e+06	3.37022e+06	2.76841e+06	619743	586452	553571	1.01912e+06	1.05696e+06	944387	-	-
Zbfn006124	531.15	193.05	532.158	C26H28O12	[M-H]-	2,6-Di-Feruloyl glucoside	Phenolic acids	Phenolic acids	-	2	4.60381e+06	5.79449e+06	1.32917e+07	61798	58466.8	110962	13281.7	37763.7	33959.6	165398	69071	119336	115474	105057	92679.3	2.44194e+06	2.43255e+06	2.20374e+06	-	-
MWSmce283	149.07	92.03	150.068	C9H10O2	[M-H]-	4'-Hydroxypropiophenone	Others	Ketone compounds	70-70-2	3	342817	225755	250961	274307	538728	301068	1.02445e+06	1.263e+06	1.05341e+06	1.12363e+06	1.00894e+06	1.02295e+06	1.11171e+06	1020734	1.12551e+06	853472	933108	840599	C13342	-
Lmbp002962	209.05	194.02	208.037	C10H8O5	[M+H]+	Isofraxetin	Lignans and Coumarins	Coumarins	50656-75-2	3	346979	301398	383885	706485	256979	543149	194880	68545.8	281221	343691	384937	569220	359702	178450	321186	398991	421743	447356	-	-
Zmzp000145	189.16	84.08	188.153	C9H20N2O2	[M+H]+	Trimethyllysine	Amino acids and derivatives	Amino acids and derivatives	23284-33-5	2	12489341	2.1118e+07	1.55645e+07	804100	2.27282e+06	898718	816201	109669	672041	6.74791e+06	6.54028e+06	6.26213e+06	1.00255e+07	8.91542e+06	1.12912e+07	9.19431e+06	9.48199e+06	1.02616e+07	C03793	ko00310,ko01100
pme1738	138.08	94.07	137.071	C7H9N2O	[M+H]+	3-Carbamyl-1-methylpyridinium;(1-Methylnicotinamide)	Alkaloids	Pyridine alkaloids	1005-24-9	3	2.9847e+07	1.31095e+07	2.71952e+07	6.89522e+06	1.09694e+07	1.49406e+07	3.67565e+06	2.72054e+06	3.00647e+06	8.36289e+06	6.19464e+06	7.59754e+06	5.91651e+06	7.08305e+06	5.77701e+06	8.85705e+06	7.98693e+06	8.08655e+06	C02918	ko00760,ko01100
mws0009	179.07	91.06	178.063	C10H10O3	[M+H]+	Coniferaldehyde	Others	Aldehyde compounds	20649-42-7	3	599612	752985	763151	460878	431551	479016	1.09345e+06	1.83156e+06	1.09277e+06	1.75139e+06	1.63573e+06	1.46758e+06	1.65964e+06	1.47148e+06	1.49684e+06	1.15522e+06	1.0315e+06	1.07745e+06	C02666	ko00940,ko01100,ko01110
pmf0085	427.39	345.32	426.386	C30H50O	[M+H]+	9,19-Cyclolanost-24-en-3-ol (Cycloartenol)	Terpenoids	Triterpene	469-38-5	3	1.31641e+07	1.38487e+07	1.37752e+07	1.40978e+07	1.44613e+07	1.48781e+07	1.44337e+07	1.46616e+07	1.43809e+07	1.35421e+07	1.32767e+07	1.33982e+07	1.34888e+07	1.31437e+07	1.36475e+07	1.25661e+07	1.39178e+07	1.39009e+07	C01902	ko00100,ko01100,ko01110
MWS201483	279.13	120.08	278.127	C14H18N2O4	[M+H]+	Phe-Hyp	Amino acids and derivatives	Amino acids and derivatives	90965-82-5	2	323637	128851	269916	22266.3	52135.4	33550.8	254921	21570.6	241992	552544	284635	456898	511948	540425	290776	445142	457101	408736	-	-
Lmjp009734	233.15	131.09	232.146	C15H20O2	[M+H]+	Glechomanolide*	Terpenoids	Sesquiterpenoids	38146-68-8	1	105454	69906.5	56057	2.80583e+06	2.52202e+06	7.24246e+06	1.71456e+07	1.32823e+07	6.81363e+06	2.63666e+06	6.0136e+06	3.30391e+06	1.58855e+06	1.33874e+06	688216	3.60005e+06	3.32567e+06	3.22263e+06	C09466	-
Lmbn001981	137.02	93.03	138.032	C7H6O3	[M-H]-	2,5-Dihydroxybenzaldehyde*	Others	Aldehyde compounds	1194-98-5	1	965356	923724	692736	466707	923482	579937	2.63557e+06	3.23516e+06	2.73278e+06	3.84003e+06	3.63558e+06	3.86279e+06	4.05327e+06	3.76662e+06	3.78883e+06	2.84185e+06	2.7409e+06	2.5353e+06	C05585	ko00350,ko01100
mws5035	279.17	120.08	278.163	C15H22N2O3	[M+H]+	L-Leucyl-L-phenylalanine	Amino acids and derivatives	Amino acids and derivatives	56217-82-4	2	2.30115e+06	2.83751e+06	7.61502e+06	498386	4.51205e+06	267966	1.5363e+07	6.0385e+06	1.13173e+07	1.02932e+07	9.65325e+06	1.44583e+07	1.03357e+07	8.0837e+06	1.00154e+07	9.29865e+06	1.02366e+07	1.03485e+07	-	-
Hmcp004865	233.15	131.08	232.146	C15H20O2	[M+H]+	Costunolide*	Terpenoids	Sesquiterpenoids	553-21-9	1	24066.4	131463	197271	2.95831e+06	3.78347e+06	2.70675e+06	7.47839e+06	1.7873e+07	2.02451e+07	1.36971e+06	2.82579e+06	1.52715e+06	2.1747e+06	1.01817e+06	722253	3.40977e+06	3.0391e+06	3.27894e+06	C09382	ko00909,ko01110
pmp000567	301.11	163.04	300.1	C17H16O5	[M+H]+	Melilotocarpan A	Phenolic acids	Phenolic acids	61135-95-3	2	1.276e+07	1.22427e+07	8.22865e+06	350565	240288	288581	220443	115878	105061	8.03683e+06	8.22574e+06	6.60528e+06	1.46824e+07	1.15562e+07	1.69028e+07	8.8936e+06	9.84566e+06	9.86265e+06	-	-
Zazp002547	205.1	146.06	204.09	C11H12N2O2	[M+H]+	cyclo-(Gly-Phe)	Amino acids and derivatives	Amino acids and derivatives	10125-07-2	1	9.16652e+06	8.48654e+06	1.40607e+07	1.28523e+07	7.10622e+06	9.57393e+06	7.01107e+06	148926	7.85086e+06	2.11706e+07	2.19512e+07	2.08821e+07	2.40865e+07	2.29752e+07	2.37553e+07	1.60791e+07	1.57954e+07	1.75817e+07	-	-
Wcsn011125	361.24	279.23	362.246	C22H34O4	[M-H]-	Ethyl (4E,6E,8E,10E,13Z)-15,16-dihydroxy-5,9-dimethyloctadeca-4,6,8,10,13-pentaenoate	Others	Others	-	3	1.53583e+06	1.34092e+06	1.37884e+06	3.61303e+06	4.62257e+06	3.94796e+06	8.11408e+06	6.82389e+06	7.80696e+06	6.5537e+06	6.97439e+06	6.6919e+06	5.72751e+06	4.83543e+06	6.48034e+06	4.04493e+06	3.96315e+06	4.41643e+06	-	-
Jmcn005419	399.24	163.04	400.246	C21H36O7	[M-H]-	pterodontoside G	Terpenoids	Sesquiterpenoids	-	3	9	9	9	186704	241005	125309	89920.9	58825.3	106516	1.19411e+06	1.12692e+06	1.18739e+06	1.34424e+06	1.17404e+06	1.0839e+06	518650	482474	542054	-	-
mws1078	138.06	92.05	137.048	C7H7NO2	[M+H]+	Anthranilic Acid	Phenolic acids	Phenolic acids	118-92-3	3	2.42976e+06	4.078e+06	1.80057e+06	376722	832770	496482	458170	118390	227364	1.01388e+06	944747	875991	1.96552e+06	1.76224e+06	1.90407e+06	1.70854e+06	1.73935e+06	1.55737e+06	C00108	ko00380,ko00400,ko00996,ko00999,ko01100,ko01110,ko01230
pme2550	173.01	129.02	174.016	C6H6O6	[M-H]-	Cis-Aconitic acid	Organic acids	Organic acids	585-84-2	3	2.66398e+06	1.55976e+06	3.69032e+06	1.57254e+06	2.19412e+06	1.60018e+06	1.96116e+06	2.16945e+06	3.01209e+06	2.99248e+06	3.15168e+06	3.00237e+06	3.05305e+06	2.15114e+06	2.25276e+06	2.01409e+06	1.79382e+06	1.88115e+06	C00417	ko00020,ko00630,ko00660,ko01100,ko01110,ko01210
Lmhn004030	289.07	151.04	290.079	C15H14O6	[M-H]-	5,7,3',4',5'-Pentahydroxyflavan (Tricetiflavan)	Flavonoids	Flavanols	-	3	169233	240216	341870	9	9	9	46643.8	32168.8	45010	401799	196898	283977	176431	146950	326285	208402	204909	228107	-	-
Hasp010605	353.27	261.22	352.261	C21H36O4	[M+H]+	(S)-2,3-dihydroxypropyl (9Z,12Z,15Z)-octadeca-9,12,15-trienoate	Others	Others	129828-41-7	3	7.71216e+06	8.68496e+06	2.23945e+07	1.20825e+06	1.37194e+06	2.01815e+06	311053	268402	203536	1.54966e+06	1.22335e+06	1.2887e+06	1.57588e+06	1.61276e+06	1.43812e+06	8.86611e+06	9.00968e+06	8.07034e+06	-	-
Lhsp101905	167.11	93.07	166.099	C10H14O2	[M+H]+	Actinidialactone	Terpenoids	Monoterpenoids	76729-80-1	2	878898	886237	402407	904511	777506	608082	2.19383e+06	2.39918e+06	2.22757e+06	1.51242e+06	1.52357e+06	1.55574e+06	1.35628e+06	1.58369e+06	1.39807e+06	1.0394e+06	1.16764e+06	1.09192e+06	-	-
Lmdn006025	287.06	125.02	288.063	C15H12O6	[M-H]-	2-Hydroxy-2,3-dihydrogenistein	Flavonoids	Isoflavones	-	2	652860	476051	709729	2.32767e+06	1.17211e+06	795057	5.25774e+06	6.61139e+06	1.33888e+07	4.10022e+06	2.59146e+06	4.22066e+06	2.09848e+06	2.29665e+06	2.60873e+06	2.75701e+06	2.8262e+06	3.07862e+06	C12631	ko00943,ko01100,ko01110
Zmgn001039	266.09	134.05	267.078	C9H17NO6S	[M-H]-	S-Ribosyl-L-homocysteine	Amino acids and derivatives	Amino acids and derivatives	-	3	393584	342890	56205.1	1.93403e+06	2.24936e+06	2.19235e+06	2.05352e+06	1.33084e+06	2.09092e+06	961778	1.02055e+06	1.11893e+06	770795	702843	732621	1.12312e+06	1.00756e+06	1.02726e+06	C03539	ko00270,ko01100,ko01230
mws3133	174.08	86.06	173.069	C7H11NO4	[M+H]+	Oxaceprol	Amino acids and derivatives	Amino acids and derivatives	33996-33-7	3	600315	1.00854e+06	476592	2.96708e+06	2.14142e+06	1.68913e+06	686632	2.25444e+06	726504	444161	517244	531099	517572	414157	515377	742623	720848	662108	-	-
Lamp004464	477.14	315.09	476.131	C23H24O11	[M+H]+	Odoratin 7-Glucoside	Flavonoids	Isoflavones	-	2	9598115	5.14742e+06	8.88852e+06	315536	382185	236561	95724.4	36675	87179.4	44093.4	86700	49784.2	43383.1	119213	45010	1.31448e+06	1.17199e+06	1.2178e+06	-	-
Hmlp000935	154.09	137.06	153.079	C8H11NO2	[M+H]+	Vanillylamine	Alkaloids	Phenolamine	1196-92-5	3	2.15812e+06	1.89949e+06	1.88505e+06	84753.3	2.81975e+06	1.49987e+06	3.69248e+06	4.13472e+06	3.33413e+06	1.83451e+06	2.38575e+06	2.01667e+06	1.67325e+06	1.54725e+06	1.88875e+06	2.25535e+06	2.48239e+06	2.236e+06	C16666	ko00996,ko01100,ko01110
Cmxp005429	289.07	153.02	288.063	C15H12O6	[M+H]+	Okanin	Flavonoids	Chalcones	484-76-4	3	315487	180502	402507	431300	98508.3	350952	2.26376e+06	1.64677e+06	3.91051e+06	1.50978e+06	1.41204e+06	1.77108e+06	1.03234e+06	962172	980818	917355	948183	1.02755e+06	C08724	-
pmp000970	319.23	301.22	318.219	C20H30O3	[M+H]+	Hispanolone	Terpenoids	Ditepenoids	18676-07-8	3	1.61824e+06	1.22049e+06	2.0976e+06	1.23365e+06	1.45963e+06	1.04997e+06	1.7015e+06	2.0333e+06	1.69867e+06	1.17761e+06	1.10654e+06	1.16722e+06	1.19846e+06	1.27952e+06	1.25895e+06	1.48299e+06	1.6007e+06	1.66742e+06	-	-
Ybhn010559	457.33	457.33	458.34	C29H46O4	[M-H]-	3-Hydroxy-20-oxo-30-norlupan-28-oic acid (Platanic acid)	Terpenoids	Triterpene	6060-06-6	2	1.35359e+06	2.09298e+06	1.03375e+06	108503	196739	166240	329448	98051.6	321902	1.91506e+06	2.02247e+06	1.79482e+06	6.31335e+06	5.38318e+06	4.36882e+06	2.69584e+06	3.02781e+06	2.8167e+06	-	-
MWSHY0017	273.08	153.02	272.068	C15H12O5	[M+H]+	Naringenin (5,7,4'-Trihydroxyflavanone)*	Flavonoids	Flavanones	480-41-1	2	3.05692e+06	2.74893e+06	3.04398e+06	1.56525e+06	1.06118e+06	1.32267e+06	3.19191e+06	3.28771e+06	5.18986e+06	4.96083e+06	4.55184e+06	4.96428e+06	5.29611e+06	4.29903e+06	4.65093e+06	4.28456e+06	4.32402e+06	3.87849e+06	C00509	ko00941,ko00943,ko01100,ko01110
Lmln010063	205.16	189.13	206.167	C14H22O	[M-H]-	2,6-Di-tert-butylphenol*	Phenolic acids	Phenolic acids	128-39-2	1	3.30546e+06	3.00448e+06	2.76985e+06	3.38157e+06	3.4009e+06	3.82514e+06	3.38076e+06	2.5362e+06	3.32658e+06	3.13063e+06	2.8129e+06	3.12512e+06	2.99202e+06	3.00754e+06	3.04046e+06	2.97657e+06	2.96478e+06	2.676e+06	-	-
pme2529	163.06	101.02	164.069	C6H12O5	[M-H]-	1,5-Anhydro-D-glucitol	Others	Saccharides	154-58-5	3	2.73764e+06	3.15659e+06	2.47795e+06	473326	861865	291442	851026	688118	472361	1.35693e+06	1.20326e+06	1.3391e+06	1.50784e+06	1.60569e+06	1.03644e+06	1.77234e+06	1.81261e+06	1.61755e+06	C07326	-
mws0044	303.05	125.02	304.058	C15H12O7	[M-H]-	Taxifolin(Dihydroquercetin)	Flavonoids	Flavanonols	480-18-2	2	240341	234592	95097.4	876603	429863	665441	3.87093e+06	2.55315e+06	1.01529e+07	3.99922e+06	2.23402e+06	3.36243e+06	1.15853e+06	1.04463e+06	1.17861e+06	1.15019e+06	1.11737e+06	1.25123e+06	C01617	ko00941,ko01100,ko01110
mws0473	131.03	87.05	132.042	C5H8O4	[M-H]-	2-Methylsuccinic acid*	Organic acids	Organic acids	498-21-5	2	733085	7.97124e+06	563072	432857	1.24209e+06	401337	9.05837e+06	9.35249e+06	9.30026e+06	1.16109e+07	1.28923e+07	1.17172e+07	1.33577e+06	1.35342e+07	1.17612e+07	918916	999009	891855	-	-
Lmmn000806	131.03	87.05	132.042	C5H8O4	[M-H]-	Dimethylmalonic acid*	Organic acids	Organic acids	595-46-0	2	733085	7.97124e+06	563072	432857	1.24209e+06	401337	9.05837e+06	9.35249e+06	9.30026e+06	1.16109e+07	1.28923e+07	1.17172e+07	1.33577e+06	1.35342e+07	1.17612e+07	918916	999009	891855	-	-
Lcsn003955	287.05	125.03	288.063	C15H12O6	[M-H]-	Maesopsin	Flavonoids	Other Flavonoids	5989-16-2	1	674989	522595	706739	2.35379e+06	1.19801e+06	698996	5.35798e+06	6.87748e+06	1.35114e+07	4.24817e+06	2.51086e+06	4.24293e+06	2.12307e+06	2.42599e+06	2.79989e+06	2.77728e+06	2.7912e+06	3.08157e+06	-	-
pmb0818	206.08	145.05	205.074	C11H11NO3	[M+H]+	Methoxyindoleacetic acid	Alkaloids	Plumerane	3471-31-6	3	1.17031e+07	1.09663e+07	1.73315e+07	1.49272e+07	8.6834e+06	1.09957e+07	8.06406e+06	268191	8.41278e+06	2.25447e+07	2.24749e+07	2.05709e+07	2.45758e+07	2.20801e+07	2.11622e+07	1.93846e+07	1.77541e+07	1.73371e+07	C05660	ko00380
pmn001382	515.12	353.09	516.127	C25H24O12	[M-H]-	Isochlorogenic acid A*	Phenolic acids	Phenolic acids	2450-53-5	2	137928	271583	2081780	271421905	4.51992e+07	170666005	1.55978e+07	21731735	4.94057e+07	1.7783e+06	1.27052e+06	2.23996e+06	370448	648572	14689615	3.84746e+07	3.75602e+07	3.43028e+07	-	-
HJAP058	345.1	284.07	344.126	C19H20O6	[M+H]+	5,6,7,4'-Tetramethoxyflavanone	Flavonoids	Flavanones	2569-77-9	3	312479	9	23270.9	7.92491e+06	9.0004e+06	1.10291e+07	1.09671e+07	1.21173e+07	9.20889e+06	3.969e+06	4.75894e+06	3.72784e+06	4.26558e+06	4.32409e+06	2.07791e+06	4.06137e+06	3.84085e+06	4.32624e+06	C15118	-
Lmhn003074	309.06	193.05	310.069	C14H14O8	[M-H]-	Feruloylmalic acid	Phenolic acids	Phenolic acids	-	1	2.07714e+06	612066	1.56335e+06	113694	271333	276639	340955	311066	373109	422110	320831	382478	280194	259716	279624	498121	450654	449349	-	-
Wasn003197	323.13	179.06	324.142	C13H24O9	[M-H]-	3-(Beta-D-Glucopyranosyloxy)-5-Hydroxyhexanoic Acid Methyl Ester	Organic acids	Organic acids	-	1	389363	332564	520167	453927	346396	632919	43345	88823.9	36023.2	50015	26554.9	19698.7	9	9	9	155405	173134	172113	-	-
mws0731	179.05	78.03	180.054	C8H8N2O3	[M-H]-	Nicotinuric acid	Amino acids and derivatives	Amino acids and derivatives	583-08-4	3	4238.92	8037.97	1603.18	15675	13770.9	22107.6	21254.1	22153.1	23550.9	52173.5	74574.6	31872.7	96878	110614	53182.6	29513.9	33111.8	32311.4	C05380	ko00760
mws1574	373.11	123.01	374.121	C16H22O10	[M-H]-	Geniposidic acid	Terpenoids	Monoterpenoids	27741-01-1	2	180328	179493	295544	251326	227569	250390	20492.8	8808.72	20007.8	10643.6	14566.4	33676.8	44819.9	12534.4	19664.9	75714.1	81679.7	85288.8	C11673	ko00902,ko01110
pmn001646	865.2	577.14	866.206	C45H38O18	[M-H]-	Procyanidin C1	Tannins	Proanthocyanidins	37064-30-5	3	2185.39	1670	123549	4372.12	7654.83	25735.1	7096.4	4914.27	3824.03	141450	56262	96228.8	75025	33893.4	51414.6	53028	49673.1	55995.3	C17624	-
Lhmp101307	131.07	71.05	130.063	C6H10O3	[M+H]+	α-Hydroxyl-β,β-Dimethyl-γ-Butyrolactone	Others	Others	-	3	154770	135288	71202.2	292525	279777	123354	1.26951e+06	1.50306e+06	1.35154e+06	1.04725e+06	1.01466e+06	1.03899e+06	822215	818863	768683	779055	844399	752139	-	-
MWSmce129	233.15	187.14	232.146	C15H20O2	[M+H]+	Atractylenolide Ⅱ	Terpenoids	Sesquiterpenoids	73069-14-4	3	26152.7	25302.7	28006.1	2.11957e+06	9.88956e+06	7.75064e+06	1.48626e+07	1.63766e+07	1.26513e+07	2.04271e+06	4.772e+06	2.8886e+06	1.73661e+06	1.06703e+06	568105	4.14543e+06	3.86157e+06	3.68222e+06	C17886	-
Hmqp005411	297.24	81.07	296.235	C18H32O3	[M+H]+	9-Oxo-12Z-Octadecenoic acid	Lipids	Free fatty acids	112543-32-5	2	799862	750801	330642	3.42332e+06	2.46162e+06	2129976	3.61168e+06	1.37143e+07	4.0076e+06	2.90529e+06	2.08937e+06	1.95462e+06	2.57136e+06	2.81547e+06	1.58686e+06	2.26223e+06	2.54654e+06	2.45698e+06	-	-
MWSmce056	205.09	146.06	204.09	C11H12N2O2	[M+H]+	DL-Tryptophan	Amino acids and derivatives	Amino acids and derivatives	54-12-6	1	8.64746e+06	7.96911e+06	1.38245e+07	12135910	6.95343e+06	9.09222e+06	7.13843e+06	154210	7.56e+06	2.10924e+07	2.13513e+07	1.98665e+07	2.41827e+07	2.32943e+07	2.30439e+07	1.58944e+07	1.54204e+07	1.72918e+07	-	-
MWSmce693	151.11	81.07	150.105	C10H14O	[M+H]+	Safranal	Terpenoids	Monoterpenoids	116-26-7	3	220220	213531	371866	318270	83450.2	64854	357560	307504	300057	1.66418e+06	1.82909e+06	1.65815e+06	1.71185e+06	1.53865e+06	1.51789e+06	1.21183e+06	1.11454e+06	1.08023e+06	-	-
MWSHC2022	359.1	197.05	360.106	C15H20O10	[M-H]-	Glucosyringic acid	Phenolic acids	Phenolic acids	33228-65-8	1	6.49338e+06	3.53545e+06	6.43776e+06	2.75077e+07	9.95735e+06	2.45008e+07	114172	163219	109567	102270	140268	124345	69878.1	50065.2	101825	4.05645e+06	4.36669e+06	3.87903e+06	-	-
zjxp121705	189.14	144.08	188.131	C12H16N2	[M+H]+	N,N-Dimethyltryptamine	Alkaloids	Alkaloids	-	3	7.00107e+06	6.25318e+06	1.20678e+07	8.29206e+06	5.27902e+06	6.30958e+06	4.27461e+06	96125.8	5.00092e+06	1.50982e+07	1.45428e+07	1.20798e+07	1.62791e+07	1.58583e+07	1.46386e+07	1.34498e+07	1.19612e+07	1.24392e+07	-	-
Zbqn001667	227.1	183.12	228.111	C10H16N2O4	[M-H]-	Prolylhydroxyproline	Amino acids and derivatives	Amino acids and derivatives	18684-24-7	2	31766.2	45561.9	54829.2	12483.9	44058.8	26427.7	350507	47346.1	211650	586417	479402	481701	425630	399179	415698	334541	297775	326008	-	-
mws0367	277.22	277.22	278.225	C18H30O2	[M-H]-	α-Linolenic Acid*	Lipids	Free fatty acids	463-40-1	1	990348	968860	815123	291270	455260	406838	710667	646777	647735	1.20323e+06	1.24372e+06	1.1582e+06	1.43351e+06	1.15261e+06	1.22865e+06	1.10597e+06	989013	1.00989e+06	C06427	ko00592,ko01040,ko01100,ko01110
pmp000193	503.12	255.07	502.111	C24H22O12	[M+H]+	6''-O-Malonyldaidzin	Flavonoids	Isoflavones	124590-31-4	3	9.45068e+06	1.20281e+07	3.48296e+06	58975.4	45010	45770	15005	20005	31813.8	21267.3	25088.8	24073.3	46680	65222.4	25892.6	1.58149e+06	1.78457e+06	1.6879e+06	C16191	ko00943
pme1730	117.02	73.03	118.027	C4H6O4	[M-H]-	D-Erythronolactone	Organic acids	Organic acids	15667-21-7	3	87562.9	124856	86327.4	84446.6	74996.5	58528.5	145461	2.57025e+06	94489.9	133102	126029	132921	178943	159712	158240	119344	112777	127209	-	-
Ymjm000067	321.24	179.14	320.235	C20H32O3	[M+H]+	14-Hydroxyvibsanin F	Terpenoids	Ditepenoids	-	3	5.02934e+06	5.22295e+06	1.94115e+06	723421	1.0558e+06	1.44214e+06	924560	572892	626363	2.20365e+06	2.41032e+06	1.83953e+06	3.49872e+06	3.37683e+06	2.85131e+06	2.10104e+06	2.2639e+06	2.37001e+06	-	-
Wbmn013660	335.22	253.22	336.23	C20H32O4	[M-H]-	3,9-Dihydroxy-13(14)-labden-16,15-olide	Terpenoids	Ditepenoids	-	1	2.15621e+06	2.29826e+06	813047	1.09143e+06	1.27416e+07	2.03903e+06	7.11197e+06	7.90603e+06	7.19252e+06	6.07123e+06	6.65488e+06	6.8365e+06	8.68289e+06	6.40087e+06	6.71605e+06	6.01283e+06	6.5304e+06	6.7739e+06	-	-
Wbmn003411	369.08	207.05	370.105	C20H18O7	[M-H]-	9-hydroxysesamin(ISO-2)	Lignans and Coumarins	Lignans	-	2	179202	203769	171259	1.56868e+06	1.03252e+06	1.00892e+06	28602.4	20198.9	28071.9	58102.3	87590.2	35951.7	46680	105320	34998.1	278599	251853	250864	-	-
mws0258	132.1	86.1	131.095	C6H13NO2	[M+H]+	L-Isoleucine*	Amino acids and derivatives	Amino acids and derivatives	73-32-5	1	8.83323e+06	9.36841e+06	1.07038e+07	1.99765e+06	4.39817e+06	957342	1.01253e+07	3.63023e+06	8.71604e+06	1.661e+07	1.74808e+07	1.58413e+07	1.93842e+07	1.82572e+07	1.8571e+07	1.61618e+07	1.55505e+07	1.43387e+07	C00407	ko00280,ko00290,ko00460,ko00960,ko00966,ko00970,ko01100,ko01110,ko01210,ko01230,ko02010
mws0227	132.1	86.1	131.095	C6H13NO2	[M+H]+	L-Leucine*	Amino acids and derivatives	Amino acids and derivatives	61-90-5	1	8.83323e+06	9.36841e+06	1.07038e+07	1.99765e+06	4.39817e+06	957342	1.01253e+07	3.63023e+06	8.71604e+06	1.661e+07	1.74808e+07	1.58413e+07	1.93842e+07	1.82572e+07	1.8571e+07	1.61618e+07	1.55505e+07	1.43387e+07	C00123	ko00280,ko00290,ko00966,ko00970,ko01100,ko01110,ko01210,ko01230,ko02010
Lmhp010515	510.36	184.07	509.348	C25H52NO7P	[M+H]+	LysoPC 17:0(2n isomer)*	Lipids	LPC	-	2	693304	863158	364294	265311	199858	394557	26827.9	17832.1	27500.6	31873.8	54685.2	91057.3	47390.7	27714.9	29526.3	153634	145846	164464	-	-
MWSHY0016	449.11	299.06	448.101	C21H20O11	[M+H]+	Luteolin-6-C-glucoside (Isoorientin)*	Flavonoids	Flavones	4261-42-1	1	2979180	371369	460451	101897	359938	238540	490279	170542	148547	6.28612e+06	961086	7123920	865965	1.6036e+06	1997245	963433	1.01752e+06	1.0868e+06	C01821	-
Lmgn013947	471.35	471.35	472.355	C30H48O4	[M-H]-	2α,3α-Dihydroxyolean-12-en-28-oic acid	Terpenoids	Triterpene	26563-68-8	2	559796	562653	378245	408327	413231	80546.3	388623	444551	333852	1.51587e+06	1.79547e+06	1.3145e+06	5.69439e+06	5.85341e+06	4.39052e+06	2.31629e+06	2.07359e+06	2.10884e+06	-	-
Walp004391	309.1	147.04	308.09	C15H16O7	[M+H]+	7-C-Glucosylcoumarin	Lignans and Coumarins	Coumarins	-	3	736830	742403	754807	161349	93370	271897	74963.7	66685	121248	767715	947086	703440	936164	846330	919282	606707	620174	679065	-	-
mws4176	237.12	120.09	236.116	C12H16N2O3	[M+H]+	L-Alanyl-L-Phenylalanine	Amino acids and derivatives	Amino acids and derivatives	3061-90-3	2	1.82972e+06	1.17666e+06	8.82643e+06	190909	1.63813e+06	141637	969310	1.20554e+06	849409	1.23214e+06	1.29511e+06	1.91926e+06	921072	723545	1.03494e+06	1.62025e+06	1.68119e+06	1.82214e+06	-	-
mws0041	271.06	123.01	270.053	C15H10O5	[M+H]+	Baicalein	Flavonoids	Flavones	491-67-8	3	207502	184480	202970	50745.8	49619.1	62462.3	97213.2	68115.2	78098.2	347842	355256	349633	460152	446478	361276	321619	301941	340930	C10023	-
Lazp005998	239.2	107.09	238.193	C15H26O2	[M+H]+	Guaianediol	Terpenoids	Sesquiterpenoids	-	2	168745	153589	76252.9	409481	147121	456120	549809	522230	536062	415899	449756	455387	431493	445989	451174	465435	486064	524306	-	-
Wbtp005759	303.05	303.05	302.043	C15H10O7	[M+H]+	1,2,5,7,8-pentahydroxy-3-methylanthracene-9,10-dione	Flavonoids	Other Flavonoids	-	1	117831	40786.1	187488	91160.8	156335	50535.8	2.30811e+07	2.7789e+06	3.46377e+07	4.21092e+07	1.95385e+07	2.10668e+07	5.6084e+06	3.76963e+06	1.04405e+07	8.41039e+06	9.47981e+06	9.15247e+06	-	-
Wbjp006632	625.25	325.11	624.247	C36H36N2O8	[M+H]+	Tribulusamide A	Alkaloids	Alkaloids	-	3	1.91756e+06	1.66036e+06	2.81348e+06	2.0715e+06	4.46025e+06	1.09171e+07	1.24641e+07	9.49874e+06	5.83796e+06	1.28978e+07	8.18639e+06	1.43251e+07	6.0737e+06	2.90693e+06	1.12147e+07	5.14925e+06	5.53577e+06	5.81754e+06	-	-
Wayn001856	379.03	241	380.041	C13H16O11S	[M-H]-	4-Hydroxybenzoic acid 4-(6-O-sulfo)glucopyranoside	Phenolic acids	Phenolic acids	-	3	1.85368e+06	1.69294e+06	1.48967e+06	2.86207e+06	2.66563e+06	3.59613e+06	3.7976e+06	2.01488e+06	3.03535e+06	1.93388e+06	1.57124e+06	1.85787e+06	956908	711851	1.55456e+06	1.54129e+06	1.70489e+06	1.72605e+06	-	-
Qatp009393	235.17	105.07	234.162	C15H22O2	[M+H]+	Dihydrocostunolide	Terpenoids	Sesquiterpenoids	2225-79-8	1	413573	320531	362305	807694	1.78628e+06	1.96762e+06	1.22738e+07	5.30108e+06	3.9809e+06	1.06279e+06	2.91933e+06	1.88264e+06	824163	1.36632e+06	554136	1.76012e+06	1.78501e+06	1.59271e+06	-	-
mws0214	181.07	71.01	182.079	C6H14O6	[M-H]-	D-Sorbitol	Others	Saccharides	50-70-4	1	1.0213e+07	1.16835e+07	3.19063e+06	6.34779e+06	1.47279e+07	5.8493e+06	2.18839e+07	1.30998e+07	3.24772e+06	531877	598793	593355	606043	754196	1.07105e+06	9.85959e+06	9.24166e+06	8.72719e+06	C00794	ko00051,ko00052,ko01100,ko02010
Lmhp206353	493.13	331.08	492.127	C23H24O12	[M+H]+	Tricin-4'-O-glucoside	Flavonoids	Flavones	-	3	4.57516e+07	9.87294e+07	7.34293e+07	2.86108e+07	1.82454e+07	4.53664e+07	857612	661749	299813	412430	162170	378644	279562	238716	183511	1.99412e+07	2.22248e+07	2.22047e+07	-	-
pmp000009	361.09	303.05	360.084	C18H16O8	[M+H]+	Centaureidin (5,7,3'-Trihydroxy-3,6,4'-Trimethoxyflavone)	Flavonoids	Flavones	17313-52-9	3	9955.73	17975.9	30431.2	450882	585360	531398	500834	583900	387509	136524	212117	177650	137285	104113	112665	198437	215485	191442	-	-
MWSmce454	151.04	65.04	152.047	C8H8O3	[M-H]-	3,5-Dihydroxyacetophenone	Phenolic acids	Phenolic acids	51863-60-6	3	88524.3	92802.1	161217	37692.3	66411.9	53135.1	42784	57767.8	102975	174055	117922	127681	61281.3	60758.8	61856.9	94453.9	85685.5	84576.9	-	-
pmb0962	235.17	118.09	234.158	C10H22N2O4	[M+H]+	L-Lysine-Butanoic Acid	Amino acids and derivatives	Amino acids and derivatives	80407-71-2	3	9.48598e+06	4.91863e+06	1.07533e+07	1.11239e+08	1.47674e+08	1.47167e+08	7.03047e+06	6.39279e+06	8.76245e+06	3.65526e+06	3.8647e+06	4.26557e+06	2.52132e+06	2.32115e+06	2.36341e+06	5.32681e+06	5.25988e+06	5.8735e+06	-	-
Zjxp110311	235.2	161.13	234.162	C15H22O2	[M+H]+	Costic acid	Terpenoids	Sesquiterpenoids	3650-43-9	1	75287.2	108561	18137.4	122302	285440	120778	917219	827420	1.5602e+06	350097	179150	111083	170906	316670	135585	152350	141494	134967	-	-
Lmmn002260	551.21	389.17	552.221	C27H36O12	[M-H]-	5'-Methoxyisolariciresinol-9'-O-glucoside	Lignans and Coumarins	Lignans	-	3	1.46448e+06	1.40416e+06	2.35924e+06	398400	750653	988922	40679.2	23340	43345	155594	137077	160318	113598	90103	131077	551810	624097	589968	-	-
pmp000235	527.15	331.08	526.148	C27H26O11	[M+H]+	Salcolin B*	Flavonoids	Flavones	-	3	1.14385e+07	1.06322e+07	1.94326e+06	1.32815e+06	234745	1.44054e+06	2.4614e+06	359092	619334	3.28334e+07	1.40934e+07	8.27732e+06	6.06198e+06	5.51557e+06	7.27935e+06	6.34344e+06	6.70962e+06	7.17015e+06	-	-
Lmcn009539	293.25	293.25	294.256	C19H34O2	[M-H]-	E,E,Z-1,3,12-Nonadecatriene-5,14-diol	Lipids	Free fatty acids	-	1	1.85108e+07	1.55603e+07	1.59223e+07	1.51015e+07	1.81468e+07	1.72468e+07	1.6409e+07	1.59298e+07	1.04629e+07	1.12494e+07	1.03302e+07	1.24729e+07	1.09753e+07	1.22158e+07	1.01221e+07	1.47287e+07	1.38576e+07	1.30208e+07	-	-
pme0008	176.1	113.07	175.096	C6H13N3O3	[M+H]+	L-Citrulline	Amino acids and derivatives	Amino acids and derivatives	372-75-8	3	1.00321e+06	1.48211e+06	1.74579e+06	3.75875e+06	2.92218e+06	1.85873e+06	676815	299124	688817	866133	323456	453284	733492	683549	823707	1.68297e+06	1.52018e+06	1.5107e+06	C00327	ko00220,ko01100,ko01110,ko01230
pmp001254	625.25	488.17	624.247	C36H36N2O8	[M+H]+	Grossamide	Alkaloids	Phenolamine	80510-06-1	2	1.35316e+06	968507	2.24953e+06	1.8473e+06	2.97815e+06	7.92431e+06	8.89313e+06	8.08791e+06	4.81371e+06	8.87428e+06	7.68184e+06	1.19691e+07	5.84248e+06	2.23465e+06	7.80267e+06	4.91802e+06	4.46488e+06	5.02184e+06	-	-
HJN041	451.12	289.07	452.132	C21H24O11	[M-H]-	Epicatechin glucoside	Flavonoids	Flavanols	-	3	173335	236495	499132	791517	364521	945538	31317.5	22162	93341.3	38345	112502	40913.5	103970	15759.6	508210	331565	331245	297140	-	-
Lskp211385	357.13	307.09	356.126	C20H20O6	[M+H]+	(-)-dihydrosesamin	Lignans and Coumarins	Lignans	-	3	812983	568242	632416	3.30422e+06	3.46982e+06	3.38666e+06	5.38858e+06	1.00603e+07	7.49523e+06	1.64121e+06	1.44394e+06	2.35039e+06	666552	1.42514e+06	988385	2.22336e+06	2.31164e+06	2.04422e+06	-	-
Wagp009074	345.1	315.05	344.09	C18H16O7	[M+H]+	Santin	Flavonoids	Flavones	27782-63-4	1	14623.1	21721.2	9678.84	1.81937e+07	2.2369e+07	2.58374e+07	2.26897e+07	2.2927e+07	1.88482e+07	7.67669e+06	9.04904e+06	7.80209e+06	6.39444e+06	5.27629e+06	4.70701e+06	9.09776e+06	9.18386e+06	8.1932e+06	-	-
Zmxp004480	625.18	301.07	624.169	C28H32O16	[M+H]+	Chrysoeriol-7-O-gentiobioside	Flavonoids	Flavones	-	3	533168	569177	1.13173e+06	48345	33906	81770.8	31675	16278.6	18340	33340	45010	18053.6	77145.7	28340	17012.1	161763	171976	183230	-	-
mws0988	315.05	165.04	316.058	C16H12O7	[M-H]-	Rhamnetin; 3,5,3',4'-Tetrahydroxy-7-Methoxyflavone	Flavonoids	Flavonols	90-19-7	3	13336.7	5060.41	24514.4	159831	169076	221857	244033	195950	168507	108276	71074.9	83128.3	47094.9	60382.9	117435	80724.2	88333.3	78523.2	C10176	-
MWSmce274	123.05	93.04	124.052	C7H8O2	[M-H]-	Salicyl Alcohol	Phenolic acids	Phenolic acids	90-01-7	3	57699.7	34337.9	78704	88404.7	122159	91836	650786	560143	622790	524146	626766	591226	530873	516126	558531	417520	408487	370582	C02323	-
Lmhp008718	506.32	184.07	505.317	C25H48NO7P	[M+H]+	LysoPC 17:2	Lipids	LPC	-	1	3.53269e+06	3.69183e+06	1.91561e+06	1.06782e+06	1.11057e+06	1.52858e+06	1971.8	9289.91	12300.5	11360.3	32776.8	9497.9	11910.8	6478.43	28997.6	611352	640933	691375	-	-
Wbtp005613	303.05	303.05	302.043	C15H10O7	[M+H]+	robustaquinone F	Flavonoids	Other Flavonoids	-	3	71690	47800.4	196500	18177	63350	34274.2	2.21695e+07	2.41323e+06	3.44711e+07	3.79372e+07	1.65726e+07	2.00847e+07	4.78695e+06	3.30327e+06	9.28175e+06	7.95075e+06	8.91626e+06	8.09372e+06	-	-
Hamp011640	256.26	102.09	255.256	C16H33NO	[M+H]+	Hexadecanamide	Alkaloids	Alkaloids	629-54-9	3	1.38283e+06	1.46482e+06	1.36601e+06	1.39821e+06	2.65955e+06	1.53713e+06	1.59471e+06	1.38775e+06	1.44564e+06	1.23124e+06	1.21183e+06	1.2571e+06	1.25242e+06	1.12589e+06	1.22751e+06	2.20159e+06	2.04833e+06	1.94453e+06	-	-
MWS5185	151.04	109.03	152.047	C8H8O3	[M-H]-	2',4'-Dihydroxyacetophenone*	Others	Ketone compounds	89-84-9	2	7281.06	9385.24	13310.4	988684	1.21663e+06	683012	3.90985e+06	3.75781e+06	1.04518e+07	629974	820078	856651	776604	391175	226756	1.35612e+06	1.2294e+06	1.2099e+06	C03663	-
Zmhn002227	385.11	223.06	386.121	C17H22O10	[M-H]-	4-O-Glucosyl-sinapate	Phenolic acids	Phenolic acids	-	2	7.37068e+06	4.08031e+06	1.38665e+07	1.90526e+06	1.40408e+06	2.27431e+06	38345	28286.2	39931.6	31936.7	26500.2	62857.3	48171.5	22165	24219.5	2.38303e+06	2.17238e+06	2.11887e+06	C02919	-
pme0021	166.09	120.08	165.079	C9H11NO2	[M+H]+	L-Phenylalanine	Amino acids and derivatives	Amino acids and derivatives	63-91-2	1	2.81475e+06	3.29325e+06	4.17364e+06	578205	832933	205243	2.73008e+06	99398.2	2.60754e+06	6.8164e+06	6.40958e+06	4.14173e+06	6.73115e+06	6.69118e+06	6.30338e+06	5.81271e+06	5.30703e+06	5.16404e+06	C00079	ko00360,ko00400,ko00460,ko00470,ko00940,ko00960,ko00966,ko00970,ko00996,ko00999,ko01100,ko01110,ko01210,ko01230,ko02010
MWSmce548	118.09	58.07	117.079	C5H11NO2	[M+H]+	Betaine	Alkaloids	Alkaloids	107-43-7	3	2.39039e+06	1.69753e+06	2.34249e+06	1.03398e+07	1.26157e+07	1.2103e+07	3.49555e+06	3.20305e+06	3.79592e+06	2.38917e+06	2.34584e+06	2.5036e+06	2.11919e+06	1.71971e+06	1.80893e+06	2.86414e+06	2.66668e+06	2.52796e+06	C00719	ko00260,ko01100,ko02010
Cmdn000784	167.02	124.01	168.028	C5H4N4O3	[M-H]-	Uric acid	Nucleotides and derivatives	Nucleotides and derivatives	69-93-2	1	564613	835319	1.3723e+06	188323	3.40904e+06	114221	995134	589109	1.17156e+06	1.90205e+06	1.94457e+06	1.51693e+06	2.24387e+06	2.13468e+06	2.31785e+06	2.29632e+06	2.03276e+06	2.23313e+06	-	-
mws0984	236.08	164.06	237.086	C9H11N5O3	[M-H]-	L-Sepiapterin	Nucleotides and derivatives	Nucleotides and derivatives	17094-01-8	3	799253	971332	272913	308491	471602	392480	406058	489999	406134	422825	412361	444584	666670	596503	523740	548040	507661	575865	C00835	ko00790,ko01100
Wasn001007	337.08	277.06	338.085	C12H18O11	[M-H]-	Isoascorbic acid 2-O-glucoside	Others	Vitamin	-	2	3.04071e+06	2.44047e+06	4.25485e+06	1.07561e+06	1.25419e+06	1.44021e+06	339979	1.24194e+06	10383.1	161176	152400	209955	148931	118805	89393.2	868013	982047	950441	-	-
Laxp008689	269.08	213.09	268.074	C16H12O4	[M+H]+	(2Z)-6-hydroxy-2-(3-methoxybenzylidene)-1-benzofuran-3(2H)-one	Flavonoids	Other Flavonoids	1234351-88-2	1	2.00006e+07	1.46831e+07	6.23563e+06	266530	100040	150672	302354	274265	309406	1.03439e+07	1.36369e+07	1.17487e+07	2.30336e+07	1.50236e+07	3.00224e+07	1.35526e+07	1.3942e+07	1.52684e+07	-	-
pmd0136	524.37	184.07	523.364	C26H54NO7P	[M+H]+	LysoPC 18:0(2n isomer)	Lipids	LPC	-	1	1.52295e+06	1.4219e+06	878207	630242	611877	831751	15456	34063.6	18880.6	61626.8	44437.5	78532.7	54556.4	39497.4	155518	293831	291167	325637	-	-
Jmbp005389	361.09	331.05	360.084	C18H16O8	[M+H]+	Thymonin (5,6,4'-Trihydroxy-7,8,3'-trimethoxyflavone)	Flavonoids	Flavones	76844-67-2	1	80840.3	60043	63967.5	3.75635e+07	4.07623e+07	4.30735e+07	4.20994e+07	49293907	3.56961e+07	1.22702e+07	1.40511e+07	1.29939e+07	8.67486e+06	8.58746e+06	7.3354e+06	1.3889e+07	1.57646e+07	1.48874e+07	C10191	-
Lmmn006896	357.26	59.01	358.272	C20H38O5	[M-H]-	3-Hydroxy-4-methyl-2-tridecanoyloxypentanoic acid methyl ester	Lipids	Free fatty acids	-	2	66191.1	80812.6	114240	108983	79813.8	89920.2	47072.6	57971.1	30286	32406.7	56564.2	28336.8	59953.7	333470	300741	38869.1	38006	42739.1	-	-
Hmcp001824	213.07	167.06	212.059	C12H8N2O2	[M+H]+	Ailanindole	Alkaloids	Plumerane	159903-51-2	3	155012	219455	140075	597334	703643	551379	1.09901e+07	591641	1.1351e+07	4.05617e+06	4.24174e+06	7485105	3343810	2.77117e+06	1.60835e+06	2.03368e+06	1.83451e+06	1.81829e+06	-	-
mws1198	179.07	73.03	180.079	C10H12O3	[M-H]-	Methyl 3-(4-hydroxyphenyl)propionate	Phenolic acids	Phenolic acids	5597-50-2	3	4958.99	2632.97	3291.95	22308.4	23091.4	21953.7	155436	66905.3	200978	196261	182848	181544	251354	192541	191455	107313	111661	121354	-	-
MWSmce468	151.04	77.04	152.047	C8H8O3	[M-H]-	2-hydroxymethyl benzoic acid	Phenolic acids	Phenolic acids	612-20-4	2	66157.3	65791.2	46009.5	57180.6	68719.3	51451.5	1.30546e+06	58607.1	1.40845e+06	361090	454930	434346	164060	145809	142567	265025	254082	233669	C10804	-
Zmyn002321	107.05	106.04	108.058	C7H8O	[M-H]-	4-Methylphenol	Phenolic acids	Phenolic acids	106-44-5	1	551070	145181	93434.9	141317	384143	129670	248064	299990	262892	466784	536042	440734	803389	683114	704767	378962	422131	425518	C01468	ko01100
Zmjn001813	159.07	97.06	160.074	C7H12O4	[M-H]-	Pimelic acid*	Organic acids	Organic acids	111-16-0	2	1.89235e+06	2.41733e+06	815726	1.00249e+06	662151	625040	1.0674e+06	1.58423e+06	861018	1.58987e+06	1.81663e+06	1.5242e+06	2.83425e+06	2.5257e+06	2.84017e+06	1.62791e+06	1.80617e+06	1.833e+06	C02656	ko00780,ko01100,ko01240
Hmhn003067	325.09	119.05	326.1	C15H18O8	[M-H]-	Phenylpropionic acid-O-β-D-glucopyranoside	Phenolic acids	Phenolic acids	-	1	1.04814e+07	1.28384e+07	2.30657e+07	3.20625e+06	3.38025e+06	4.73984e+06	103897	72310.3	99215.7	71719.3	68931.7	75078.6	33340	45247.3	53338.9	3.1884e+06	3.62257e+06	3.41698e+06	-	-
Lmbn001181	531.14	531.13	532.143	C22H28O15	[M-H]-	Fraxetin-7,8-di-O-glucoside	Lignans and Coumarins	Coumarins	-	3	5.66947e+06	3.60123e+06	2.99084e+06	1.98459e+06	2.43026e+06	2.3867e+06	1.88548e+06	386716	1.8619e+06	2.58986e+06	3.02921e+06	4.82801e+06	997415	4.09258e+06	3.02385e+06	3.14966e+06	3.15774e+06	3.51594e+06	-	-
Zmyn002323	151.04	107.05	152.047	C8H8O3	[M-H]-	2-Hydroxyphenylacetic acid	Organic acids	Organic acids	614-75-5	1	2.44173e+06	1.84585e+06	1.11188e+06	1.60908e+06	3.84844e+06	1.33381e+06	2.55055e+06	2848846	2.46879e+06	4.44649e+06	4.57922e+06	4.69051e+06	7.78396e+06	7.03249e+06	7.22722e+06	3.86179e+06	4.10983e+06	3.61592e+06	C05852	ko00360,ko01100
MWSslk140	192.07	56.05	191.062	C7H13NO3S	[M+H]+	N-Acetyl-L-Methionine	Amino acids and derivatives	Amino acids and derivatives	65-82-7	1	267326	309440	454727	65073.3	149450	29103.6	2.25465e+06	1.17946e+06	2.42291e+06	4.71203e+06	4.68636e+06	3.51612e+06	5.46619e+06	6.04205e+06	4.96018e+06	3.01408e+06	2.65912e+06	2.78059e+06	C02712	-
Laxp007582	289.11	161.06	288.1	C16H16O5	[M+H]+	7,2'‑dihydroxy‑4'‑methoxy‑isoflavanol	Flavonoids	Other Flavonoids	-	1	1.18207e+07	1.25128e+07	4.0758e+06	145080	438684	187928	335701	458330	387631	3.54648e+06	3.6432e+06	2.89541e+06	1.17226e+07	9.82041e+06	1.01226e+07	5.19851e+06	5.85552e+06	5.78167e+06	-	-
Wcsn011122	279.23	279.24	280.24	C18H32O2	[M-H]-	(5Z,10E,14S)-14-hydroxy-2,6,10-trimethylpentadeca-5,10-dien-4-one	Others	Others	-	3	838323	788226	677295	798523	969960	767252	1.38819e+06	1.44764e+06	1.44669e+06	1.67665e+06	1.71596e+06	1.6765e+06	1.70833e+06	1.37135e+06	1.69934e+06	1.19714e+06	1.28821e+06	1.36136e+06	-	-
Yajn003986	445.21	59.01	446.215	C21H34O10	[M-H]-	Dihydropenstemide	Terpenoids	Monoterpenoids	-	3	5.70723e+06	2.78786e+06	3.54286e+06	4.8705e+06	6.55619e+06	7.10977e+06	24848.3	36950.4	37555.7	43514.7	26584.3	98583.5	33250	22470.8	60632	2.02652e+06	2.17428e+06	2.3049e+06	-	-
mws1346	162.08	98.06	161.069	C6H11NO4	[M+H]+	DL-2-Aminoadipic acid	Alkaloids	Alkaloids	542-32-5	3	2.35651e+06	2.77867e+06	1.87831e+06	2.11933e+06	2.33124e+06	3.15972e+06	1.09807e+06	690072	919282	1.1223e+06	1.19849e+06	1.20171e+06	1.22002e+06	1.21555e+06	1.25859e+06	1.28725e+06	1.37625e+06	1.21043e+06	C00956	ko00300,ko00310,ko01100,ko01110,ko01210,ko01230
Wmhp000055	169.05	65.04	168.042	C8H8O4	[M+H]+	2,5-Dimethoxybenzoquinone*	Quinones	Quinones	3117-03-1	3	410277	453370	514135	1.86701e+06	1.19797e+06	1.79859e+06	31774.6	18212.2	44084.5	33799.7	25715.6	18340	27093.3	14260	30203.3	295197	261037	288539	-	-
Ymjm000152	271.08	108.02	272.09	C12H16O7	[M-H]-	p-Hydroxypheny-β-D-allopyranoside	Phenolic acids	Phenolic acids	-	3	645592	930905	578001	229028	77250.2	183981	5366.02	2422.61	6174.35	10197.8	4446.78	27749	5376.83	6365.12	6915.6	113817	104999	100343	-	-
Lacp004731	255.06	181.06	254.057	C15H10O4	[M+H]+	3-Hydroxy-1-methoxy-9,10-anthraquinone	Quinones	Anthraquinone	28504-24-7	2	906199	1.06709e+06	386900	35785.5	49662	81695	133932	102534	130912	968687	1.13102e+06	1.07951e+06	1.74144e+06	1.52588e+06	1.84386e+06	1.06792e+06	955358	1.07296e+06	-	-
pmb2795	177.06	133.07	178.063	C10H10O3	[M-H]-	4-Methoxycinnamic acid	Phenolic acids	Phenolic acids	830-09-1	3	587593	583158	364279	15919.2	43542.5	38587.2	106567	151685	145828	571490	1.23011e+06	1.45975e+06	1.27377e+06	1.26319e+06	1.41008e+06	796211	818548	722583	-	-
pma6298	96.04	68.05	95.0371	C5H5NO	[M+H]+	3-Hydroxypyridine	Alkaloids	Pyridine alkaloids	109-00-2	3	38900.4	54955.2	42243.1	28394.2	97401.9	27659.1	35067.3	91522.3	148150	110666	148215	162663	221548	133286	143137	96105.1	89854.3	102245	-	-
Wbsp008647	441.37	423.36	440.365	C30H48O2	[M+H]+	3α-hydroxy-14-serraten-21-one	Terpenoids	Triterpene	-	3	2.42831e+06	3.20248e+06	1.30289e+06	115986	339208	98987.2	592159	616013	450632	1.15488e+07	1.3713e+07	1.12848e+07	1.95779e+07	1.86931e+07	1.64972e+07	9.42874e+06	1.07108e+07	1.03024e+07	-	-
mws0042	305.07	169.01	306.074	C15H14O7	[M-H]-	Epigallocatechin	Flavonoids	Flavanols	970-74-1	3	59600	34334	23412.2	8719.65	7669.35	5458.73	23340	20005	13594.2	100232	86255.9	87559	126349	135261	159004	69425.8	61873	62560.9	C12136	ko00941,ko01110
mws0248	243.06	110.02	244.07	C9H12N2O6	[M-H]-	Uridine	Nucleotides and derivatives	Nucleotides and derivatives	58-96-8	1	3.05749e+07	1.58228e+07	5.25202e+07	1.20374e+06	6.89169e+06	1.31348e+06	218540	128440	192640	403614	447956	619410	250601	116330	370885	2.56728e+06	2.88274e+06	2.59911e+06	C00299	ko00240,ko01100,ko01232,ko02010
mws1521	285.1	121.03	286.105	C13H18O7	[M-H]-	Salicin	Phenolic acids	Phenolic acids	138-52-3	3	613727	820588	1.08833e+06	121052	174697	226583	9	9	9	35558.2	18973.1	14297.8	43586.5	29701.4	27428.1	194184	212603	220593	C01451	ko00010
MWSHY0176	301.11	181.05	300.1	C17H16O5	[M+H]+	Farrerol (6,8-Dimethyl-5,7,4'-trihydroxyflavanone)	Flavonoids	Flavanones	24211-30-1	1	68418.9	31112.4	134301	4.6127e+07	5.41471e+07	6.90719e+07	5.03706e+07	4.98726e+07	4.0808e+07	1.28667e+07	1.45521e+07	1.35187e+07	7.54052e+06	8.73623e+06	7.99633e+06	1.72433e+07	1.92801e+07	1.93841e+07	C09734	-
Lssp210087	359.15	137.06	358.142	C20H22O6	[M+H]+	Matairesinol	Lignans and Coumarins	Lignans	580-72-3	2	96705	172887	148415	540018	485098	112638	1.5497e+06	221845	1.29239e+06	924754	794654	578304	1030385	871298	743713	539733	606148	546405	C10682	ko00999,ko01100,ko01110
pmb2673	210.04	135.04	211.048	C9H9NO5	[M-H]-	6-Hydroxydopaquinone	Amino acids and derivatives	Amino acids and derivatives	135791-48-9	3	47737.1	54301.1	59933.1	1880.51	10879	6559.41	26863.5	2148.55	19428.3	63301.6	63585.6	63539.6	61058.6	48592.3	48184.5	42387.9	48183.7	46357.3	-	-
Hmpp003270	449.11	287.05	448.101	C21H20O11	[M+H]+	Luteolin-4'-O-glucoside	Flavonoids	Flavones	6920-38-3	2	3.56441e+06	5.72317e+06	3.64064e+06	2.5983e+06	2.24617e+06	2.48901e+06	157286	171578	174512	109428	134084	439763	170192	75213.4	187973	1.38346e+06	1.52455e+06	1.35107e+06	-	-
mws0027	197.05	123.01	198.053	C9H10O5	[M-H]-	Syringic acid	Phenolic acids	Phenolic acids	530-57-4	1	1.4184e+06	1.56474e+06	952237	932698	1.47639e+06	1.31596e+06	8.24809e+06	5.50517e+06	8.07724e+06	8.4185e+06	8.76609e+06	9.35108e+06	6.87827e+06	7.20715e+06	7.46546e+06	5.34982e+06	5.17274e+06	4.71067e+06	C10833	-
MWSslk226	149.09	91.05	148.089	C10H12O	[M+H]+	Benzylacetone	Others	Ketone compounds	2550-26-7	2	664705	479192	1.05528e+06	3.55497e+06	3.06532e+06	2.92391e+06	6.52896e+06	5.92227e+06	1.01241e+07	2.56354e+06	2.72996e+06	4.09445e+06	1.81565e+06	2.05597e+06	1.51583e+06	2.94658e+06	2.63442e+06	2.64121e+06	-	-
Lmcp007199	143.09	128.06	142.078	C11H10	[M+H]+	2-Methylnaphthalene	Others	Others	91-57-6	3	555706	399580	657237	823338	1.92733e+06	430561	514920	482121	559584	1.03562e+06	1.0145e+06	503700	567926	613233	728432	1.58012e+06	1.48055e+06	1.38643e+06	C14098	-
Zmmp001429	189.13	86.1	188.116	C8H16N2O3	[M+H]+	Glycyl-L-leucine	Amino acids and derivatives	Amino acids and derivatives	-	1	888927	976901	1.23874e+06	42811.2	166739	22244.7	3.19128e+06	566116	3.06736e+06	9.31075e+06	7.69452e+06	1.00797e+07	5.44871e+06	5.03042e+06	6.28778e+06	7.90268e+06	7.1109e+06	7.03472e+06	-	-
Labn004481	459.11	153.02	460.122	C19H24O13	[M-H]-	Gentisic acid-[6''-(3-hydroxy-3-methylglutaryl)]-glucoside	Phenolic acids	Phenolic acids	-	2	4.80881e+06	2.93151e+06	2.28684e+06	20815.9	30010	40638.1	27326.2	10005	14266.5	9	9	9	9	9	9	434995	427327	384531	-	-
Lmjp101403	195.07	117.03	194.058	C10H10O4	[M+H]+	3ξ-(1ξ-Hydroxyethyl)-7-hydroxy-1-isobenzofuranone	Others	Others	-	3	1.43934e+06	1.16982e+06	2.24082e+06	198123	124734	225185	271845	1226935	407255	828749	555795	1.08817e+06	480906	483774	478823	1.02088e+06	940124	898059	-	-
Zmyn000453	191.02	111.01	192.027	C6H8O7	[M-H]-	Isocitric Acid	Organic acids	Organic acids	320-77-4	1	8.5768e+07	8.39478e+07	7.0405e+07	1.44928e+08	140033682	1.64549e+08	1.19012e+06	540683	931972	618384	547778	676623	230424	319039	353000	2.04854e+07	2.26666e+07	2.32367e+07	C00311	ko00020,ko00630,ko01100,ko01110,ko01200,ko01210,ko01230,ko01240
Lmjp004160	347.08	314.04	346.069	C17H14O8	[M+H]+	3,7-DimethylQuercetagetin-(3',4',5,6-Tetrahydroxy-3,7-dimethoxyflavone)	Flavonoids	Flavones	59171-23-2	2	21805.8	5202.64	7745.87	2.33026e+06	1.81543e+06	2.21566e+06	2.32291e+06	2.64564e+06	2.38546e+06	725681	867239	847073	568880	512386	461567	868332	944822	989886	C04581	-
pme3154	147.07	59.01	148.074	C6H12O4	[M-H]-	Mevalonic acid	Organic acids	Organic acids	150-97-0	2	1.23512e+07	1.13164e+07	7.46817e+06	1.02255e+07	1.39972e+07	1.1101e+07	1.32864e+06	3.66171e+06	1.5066e+06	1.95828e+06	2.08243e+06	2.0591e+06	2.71788e+06	2.40191e+06	1.97513e+06	2.73921e+06	2.40104e+06	2.56735e+06	C00418	ko00900,ko01100,ko01110
Lmln001951	595.13	300.03	596.138	C26H28O16	[M-H]-	Quercetin-3-O-(6''-O-arabinosyl)glucoside	Flavonoids	Flavonols	-	3	345389	239868	815348	75516.3	3.62066e+06	4.54839e+06	948424	292164	718895	3.70471e+06	2.62585e+06	3.94835e+06	1.63438e+06	674630	608909	1.70724e+06	1.64165e+06	1.8647e+06	-	-
Lmsn000954	207.09	59.01	208.095	C8H16O6	[M-H]-	Dambonitol	Others	Saccharides	523-94-4	3	472455	1.60487e+06	908125	234831	226850	180642	680767	756644	552294	971339	829441	1.09184e+06	1.09446e+06	1.04389e+06	1.03155e+06	860525	963138	970369	-	-
Wasn006585	447.22	315.18	448.231	C21H36O10	[M-H]-	Geranyl 3-O-xylopyranosyl-glucopyranoside	Others	Others	-	2	752461	1.0606e+06	1.06546e+06	61328	54787.8	39847.3	35798.3	92802.3	62498.4	26817.7	57631.6	77742.2	39581.2	20687.7	129645	292647	322971	285701	-	-
Lmjp009373	213.13	155.09	212.12	C15H16O	[M+H]+	Pyrocurzerenone	Terpenoids	Sesquiterpenoids	20013-75-6	2	8183.45	7733.8	11600.7	634592	495109	545615	534800	862938	563703	253296	276369	229862	181312	159531	104286	297337	260495	279472	-	-
Cmxp004977	289.07	153.02	288.063	C15H12O6	[M+H]+	Isookanin	Flavonoids	Flavanones	-	3	215222	86700	133667	194168	58989	85057.3	336099	466502	807726	349371	281169	391599	202593	188985	204369	220340	251138	240861	-	-
Wmzn000227	145.06	109.04	146.058	C6H10O4	[M-H]-	2,2-Dimethylsuccinic acid	Organic acids	Organic acids	597-43-3	3	169138	163097	148707	316508	236066	133999	14310.2	16035.3	16955.3	34677.5	37702	34243.3	25428.9	42817.9	25423.8	60431.5	68519.4	62422.1	-	-
Hmyp002315	303.04	257.04	302.043	C15H10O7	[M+H]+	3,5,7,4'-Tetrahydroxy-Coumaronochromone	Others	Chromone	-	3	1.70343e+06	734635	3.6284e+06	265522	3.73835e+06	3.6722e+06	356192	255529	347470	1.39239e+06	1.40708e+06	1.95974e+06	1.05079e+06	479908	455750	1.29958e+06	1.4839e+06	1.40518e+06	-	-
Qmqp101735	307.23	219.17	306.219	C19H30O3	[M+H]+	3β,6β-Dihydroxy-15-nor-14-oxo8(17),12-labdadien-14-a	Terpenoids	Sesquiterpenoids	-	3	1.61302e+07	1.43054e+07	1.81932e+07	452786	1.8056e+06	825396	664299	1.86481e+06	825345	5.34605e+06	4.20093e+06	4.984e+06	3.60918e+06	4.05139e+06	3.86742e+06	5.53052e+06	6.27172e+06	5.70819e+06	-	-
Hmqp006221	311.26	279.32	310.251	C19H34O3	[M+H]+	13-Hydroxy-9Z,11E-octadecadienoic acid	Lipids	Free fatty acids	18104-45-5	2	12492.6	16920.8	16271	9	9	9	29117.2	104014	12244.6	89423.5	94175.4	67570.4	133050	87237.8	81251.6	55182.7	62992.5	60175.9	-	-
Zmgp004060	463.12	301.07	462.116	C22H22O11	[M+H]+	paratensein-7-O-glucoside	Flavonoids	Isoflavones	-	3	2.38186e+07	2.08471e+07	4.88671e+07	1.05871e+07	1.31803e+07	1.22677e+07	306475	196056	188498	524414	320305	337747	487546	231369	377370	8.12864e+06	8.07952e+06	9.07468e+06	-	-
Hagn002801	385.08	85.03	386.1	C20H18O8	[M-H]-	5,6,7,5'-tetramethoxy-3',4'-methylenedioxyflavonoid	Flavonoids	Flavones	-	2	1.03317e+06	367516	1.15943e+07	136738	412156	425292	156987	192226	157319	396833	270149	387801	98359.2	152160	141120	712172	812684	752645	-	-
Zaxn007230	285.22	285.22	286.23	C20H30O	[M-H]-	Isopimaradieneone*	Terpenoids	Ditepenoids	-	2	983597	582932	574903	479267	189793	437132	103850	374160	72049.1	1.05873e+06	860802	820230	948140	800702	373392	1.33083e+06	1.26279e+06	1.44038e+06	-	-
MWSHY0199	617.11	303.05	616.106	C28H24O16	[M+H]+	Quercetin-3-O-(6''-O-galloyl)galactoside	Flavonoids	Flavonols	53171-28-1	3	123743	200942	152968	41076	20005	59771.2	22771.9	56685	29373.8	130921	119924	106179	88476.8	138532	142944	111313	113485	125761	-	-
Lahp004593	493.13	331.08	492.127	C23H24O12	[M+H]+	Flavoyadorinin A	Flavonoids	Flavonols	-	1	6.80312e+07	7.02344e+07	1.858e+08	2.96454e+07	2.98764e+07	3.74416e+07	767852	768342	625078	2.15553e+06	663399	1.73649e+06	855002	956737	693754	3.6011e+07	3.25277e+07	3.18467e+07	-	-
MWStz103	399.15	250.09	398.137	C15H22N6O5S	[M+H]+	S-(5'-Adenosyl)-L-methionine	Amino acids and derivatives	Amino acids and derivatives	29908-03-0	3	1.14768e+06	377374	978677	482522	69562.7	193899	68802.2	73431.7	108541	287120	273072	291175	331552	325101	275979	1.28629e+06	1.39994e+06	1.22792e+06	C00019	ko00261,ko00270,ko00330,ko00908,ko00999,ko01100,ko01110,ko01230,ko01240,ko04122
Wasn002449	461.13	152.01	462.137	C19H26O13	[M-H]-	Protocatechuic acid 1-O-Rutinoside	Phenolic acids	Phenolic acids	-	3	311763	351555	706700	146134	491008	508287	56609.7	42436.9	21169.2	35278.6	18046.4	39593.5	42688.2	35247.9	15913.4	159506	165292	144859	-	-
Wbjp001317	203.08	130.07	202.074	C11H10N2O2	[M+H]+	vasicinone	Alkaloids	Alkaloids	486-64-6	3	2.57679e+07	4.07937e+07	5.60354e+07	4.40969e+06	2.56779e+06	3.77866e+06	3.04159e+06	975000	3.38488e+06	2.04732e+07	1.99292e+07	2.23106e+07	2.98954e+07	3.09364e+07	2.031e+07	2.33335e+07	2.1065e+07	2.06105e+07	-	-
Wcsn010524	265.22	265.22	266.225	C17H30O2	[M-H]-	(8Z,11Z)-8,11-Heptadecadienoic acid	Others	Others	-	3	3.28162e+06	2.99262e+06	2.92645e+06	594089	999752	619135	1.32002e+06	1.18777e+06	1.38387e+06	2.68064e+06	2.6795e+06	2.76688e+06	5.179e+06	2.54571e+06	3.98213e+06	2.51038e+06	2.22857e+06	2.25012e+06	-	-
MWS2040	94.98	79.96	95.9881	CH4O3S	[M-H]-	Methanesulfonic acid	Organic acids	Organic acids	75-75-2	3	406597	517950	193630	369462	318073	330359	173093	219802	181251	208312	200713	207373	279084	313728	238966	268027	277200	242943	C11145	ko00920,ko01100
pmp000583	477.1	301.07	476.096	C22H20O12	[M+H]+	Diosmetin-7-O-glucuronide	Flavonoids	Flavones	35110-20-4	1	1.12872e+07	8.32329e+06	8.17833e+06	21508.2	27809.7	35438.4	6670	10005	12575.3	188964	97666.8	95840.2	155090	341214	79415.3	3.16692e+06	3446674	3.62386e+06	-	-
Lmgp000659	136.08	91.05	135.068	C8H9NO	[M+H]+	2-Phenylacetamide*	Alkaloids	Alkaloids	103-81-1	3	8.0722e+06	5.70044e+06	8.67477e+06	1.63554e+06	4.27384e+06	1.81236e+06	1.71438e+06	571440	1.4934e+06	695124	868032	1.02323e+06	837298	597098	1.63335e+06	1.16535e+07	1.07721e+07	1.01952e+07	C02505	ko00360,ko01100
Smln006508	313.03	269.04	314.043	C16H10O7	[M-H]-	Laccaic acid D	Quinones	Anthraquinone	18499-84-8	3	290702	2.2527e+06	1.612e+06	21911.1	242650	48444.7	55233.9	109382	101159	1.11001e+06	852634	967148	1.54749e+06	1.12888e+06	1.07007e+06	955021	834125	905605	-	-
Wcdp007388	275.2	133.1	274.193	C18H26O2	[M+H]+	(10Z,14E,16E)-10,14,16-Octadecatrien-12-Ynoic Acid	Lipids	Free fatty acids	-	2	4.77593e+06	4.77512e+06	8.097e+06	713111	2.34662e+06	1.02689e+06	2.66484e+06	4.86026e+06	3.53204e+06	7.82919e+06	5.2672e+06	6.92118e+06	4.15322e+06	6.60161e+06	8.1264e+06	6.16283e+06	5.39606e+06	5.94467e+06	-	-
mws0264	341.11	119.03	342.116	C12H22O11	[M-H]-	D-Trehalose*	Others	Saccharides	99-20-7	1	9.45079e+06	8.67953e+06	6.82734e+06	7.32135e+06	4.74244e+06	3.8256e+06	1.8702e+06	475556	1.97676e+06	182385	418780	422153	186968	142621	263449	7.36365e+06	8.22478e+06	8.36745e+06	C01083	ko00500,ko01100,ko01110,ko02010
Wcsn010496	277.22	233.23	278.225	C18H30O2	[M-H]-	(5E,9E)-6,10,14-Trimethylpentadeca-5,9-Diene-2,13-Dione	Others	Others	-	3	2.5059e+06	2.36957e+06	1.75842e+06	687216	1.03856e+06	942967	1.64192e+06	1.5398e+06	1.49295e+06	2.7758e+06	2.88402e+06	2.8198e+06	3.5729e+06	2.73152e+06	2.73974e+06	2.58123e+06	2.29435e+06	2.30403e+06	-	-
Lazn005262	405.15	165.06	406.163	C21H26O8	[M-H]-	Erythro-Guaiacylglycerol-β-Sinapyl Ether	Lignans and Coumarins	Lignans	877875-96-2	1	26095	35468.6	25141.4	113890	31193.8	85829.7	1.42653e+06	37223.7	2.25974e+06	812033	1.20988e+06	1.19768e+06	758565	829958	849374	583626	664112	602934	-	-
pme0006	116.07	70.07	115.063	C5H9NO2	[M+H]+	L-Proline	Amino acids and derivatives	Amino acids and derivatives	147-85-3	3	6.64482e+06	4.68879e+06	8.97427e+06	8.71621e+06	8.75161e+06	5.67624e+06	2.26782e+06	1.51614e+06	2.12618e+06	2.89677e+06	4.09432e+06	2.70139e+06	4.31179e+06	2.67573e+06	4.29891e+06	4.41739e+06	4.10052e+06	3.85678e+06	C00148	ko00330,ko00332,ko00470,ko00970,ko01100,ko01110,ko01230,ko02010
MWStz040	116.07	70.07	115.063	C5H9NO2	[M+H]+	Pterolactam*	Alkaloids	Pyrrole alkaloids	38072-88-7	1	6.64482e+06	4.68879e+06	8.97427e+06	8.71621e+06	8.75161e+06	5.67624e+06	2.26782e+06	1.51614e+06	2.12618e+06	2.89677e+06	4.09432e+06	2.70139e+06	4.31179e+06	2.67573e+06	4.29891e+06	4.41739e+06	4.10052e+06	3.85678e+06	-	-
mws0055	373.13	343.09	372.121	C20H20O7	[M+H]+	Tangeretin (4',5,6,7,8-Pentamethoxyflavone)*	Flavonoids	Flavones	481-53-8	3	9.21622e+06	1.01635e+07	9.28745e+06	1.01088e+07	9.91213e+06	9.9674e+06	9.43542e+06	9.3119e+06	1.06698e+07	9.60694e+06	1.01397e+07	1.00496e+07	9.62229e+06	9.60144e+06	9.55403e+06	9.41837e+06	1.02266e+07	8.94047e+06	C10190	-
Hmxp007521	315.09	300.06	314.079	C17H14O6	[M+H]+	3',4'-Dihydroxy-7,5'-dimethoxyflavone	Flavonoids	Flavones	-	2	173272	139932	135696	1.61526e+06	1.9595e+06	2.09853e+06	1.90724e+06	2.41198e+06	1.53364e+06	791688	876601	1791180	547539	572749	561269	789074	855001	904702	-	-
Qmqp101736	309.24	179.14	308.235	C19H32O3	[M+H]+	Sessilifol O	Terpenoids	Sesquiterpenoids	-	3	119227	174638	108190	47266.2	92181.9	60256.6	43874.7	235656	58816.3	101113	85908	66186.2	71997.1	88585	85263.9	117232	126180	134447	-	-
MWS1840	102.13	58.07	101.12	C6H15N	[M+H]+	Triethylamine	Alkaloids	Alkaloids	121-44-8	2	409938	342185	288391	1.23459e+06	1.16297e+06	1.30982e+06	589913	461255	604764	275573	292029	347479	232538	266555	209230	405821	354078	377159	C14691	-
pmp001281	522.36	184.07	521.348	C26H52NO7P	[M+H]+	LysoPC 18:1	Lipids	LPC	-	2	2.18117e+07	3.2509e+07	2.39927e+07	2.8723e+07	26578438	3.3572e+07	523338	1.4184e+06	700513	1.40437e+06	1.01895e+06	1.43111e+06	499268	534854	3.26453e+06	1.22153e+07	1.38934e+07	1.36491e+07	-	-
Wcgn012055	333.2	251.2	334.214	C20H30O4	[M-H]-	Araucarolone	Terpenoids	Ditepenoids	-	3	1.72726e+06	1.6739e+06	864332	388137	1.73229e+06	572618	2.8184e+06	2.55528e+06	2.73732e+06	5.53022e+06	5.81218e+06	5.84175e+06	7.91002e+06	5.13489e+06	6.32007e+06	3.7516e+06	3.9289e+06	3.42917e+06	-	-
pma0134	121.05	93.06	120.042	C4H8O4	[M+H]+	D-Threose	Others	Saccharides	95-43-2	3	247871	263603	313808	330378	382071	384236	2.09882e+07	1.3628e+07	2.14983e+07	4.61602e+07	4.58673e+07	3.83504e+07	5.15066e+07	4.47767e+07	5.18817e+07	2.77472e+07	2.47642e+07	2.46379e+07	C06463	-
Lafp003256	227.09	181.05	226.084	C11H14O5	[M+H]+	3,4'-Dihydroxy-3',5'-dimethoxypropiophenone	Others	Ketone compounds	136196-47-9	2	1.2569e+06	953636	1.08526e+06	3.32178e+06	5.53449e+06	6.54352e+06	8.72771e+06	1.05565e+07	8.80939e+06	4.2531e+06	3.75088e+06	4.18435e+06	1.9595e+06	2.62306e+06	2.52262e+06	3.57756e+06	3.48561e+06	3.9604e+06	-	-
Lhfp110832	219.18	203.14	218.167	C15H22O	[M+H]+	Furanoeremophilane	Terpenoids	Sesquiterpenoids	6750-13-6	3	4.06981e+06	4.15252e+06	4.14471e+06	4.56099e+06	3.96619e+06	4.06281e+06	3.9041e+06	4.51234e+06	4.42191e+06	4.07564e+06	4.27503e+06	4.1542e+06	3.96172e+06	3.73082e+06	4.58007e+06	4.46093e+06	4.20709e+06	4.82041e+06	-	-
Smcp000882	328.13	310.12	327.132	C15H21NO7	[M+H]+	N-benzoyl-2-aminoethyl-β-D-glucopyranoside	Alkaloids	Alkaloids	-	2	218662	200781	39820.7	118282	347482	135849	536773	287049	558036	1433507	1.26172e+06	1.27907e+06	2.62699e+06	2.04786e+06	2.7602e+06	910765	944777	1.0385e+06	-	-
Lcsp012679	322.27	62.06	321.267	C20H35NO2	[M+H]+	linolenoylethanolamine	Lipids	LPE	-	1	4.7742e+06	5.40433e+06	3.39671e+06	1.00659e+06	1.35134e+06	1.4244e+06	6.7713e+06	7.05789e+06	7.56164e+06	2.23345e+07	2.38158e+07	2.04143e+07	2.63903e+07	1.99958e+07	2.04588e+07	1.29815e+07	1.31118e+07	1.46575e+07	-	-
MWSmce089	284.12	147.04	283.121	C17H17NO3	[M+H]+	p-Coumaroyltyramine	Alkaloids	Phenolamine	36417-86-4	3	642121	224306	1.11134e+06	23340	289777	406958	56685	332897	398757	1.01376e+06	640765	1.62324e+06	310623	549860	1.12035e+06	492622	515230	563079	-	-
MWSmce455	181.05	107.01	182.058	C9H10O4	[M-H]-	Vanillic acid methyl ester	Phenolic acids	Phenolic acids	3943-74-6	3	129017	118453	81044.9	168182	173136	225764	132909	160410	116495	186378	203796	175719	148084	144627	150199	125899	143855	131422	-	-
mws0250	182.08	136.08	181.074	C9H11NO3	[M+H]+	L-Tyrosine	Amino acids and derivatives	Amino acids and derivatives	60-18-4	1	4.71499e+06	2.92972e+06	4.62874e+06	821300	2.38922e+06	1.01108e+06	871357	729380	826560	424478	500011	596034	519591	431087	940288	6.79271e+06	6.2677e+06	5.92729e+06	C00082	ko00130,ko00261,ko00350,ko00360,ko00400,ko00460,ko00730,ko00940,ko00950,ko00965,ko00966,ko00970,ko00999,ko01100,ko01110,ko01210,ko01230,ko01240
Lmhn001386	299.04	167.03	300.048	C12H12O9	[M-H]-	Vnilloyltartaric acid	Phenolic acids	Phenolic acids	-	3	4.57714e+06	3.1563e+06	2.77364e+06	94256.9	1.10488e+06	515449	59112.2	30207.5	66423.2	386728	598246	686853	768442	371639	501399	694009	791250	718233	-	-
Hmlp005624	285.08	270.05	284.068	C16H12O5	[M+H]+	3',7-dihydroxy-4'-methoxyflavone	Flavonoids	Flavones	-	1	1.3727e+07	9.60511e+06	6.52393e+06	651973	1.70542e+06	2.04534e+06	1163070	1.73526e+06	1.86428e+06	1.70462e+07	1.94765e+07	1.67445e+07	3.87719e+07	3.32287e+07	3.91898e+07	1.85013e+07	1.97101e+07	2.12343e+07	-	-
Lmyn011997	337.31	337.31	338.318	C22H42O2	[M-H]-	Erucic acid	Lipids	Free fatty acids	112-86-7	3	2.29757e+06	1.81484e+06	2.07765e+06	436634	1.8127e+06	1.86652e+06	1.8079e+06	1.56633e+06	1.59577e+06	2.27765e+06	2.18702e+06	2.06355e+06	2.42773e+06	2.39138e+06	2.05805e+06	2.22827e+06	2.05186e+06	1.94377e+06	C08316	ko01040
mws1179	433.11	271.07	434.121	C21H22O10	[M-H]-	Naringenin-7-O-glucoside (Prunin)	Flavonoids	Flavanones	529-55-5	3	451031	444149	296792	287622	194339	333924	10528.9	11082.2	10522.4	21419.1	11670	14152.2	16078	16534.9	28393.3	187585	198309	215106	C09099	ko00941,ko01100
mws0262	149.01	87.01	150.016	C4H6O6	[M-H]-	L-Tartaric acid	Organic acids	Organic acids	87-69-4	2	1.53249e+06	1.50894e+06	1.50471e+06	3.93808e+06	3.20588e+06	3.731e+06	3.37515e+06	2.34071e+06	3.13347e+06	2.28101e+06	2.50149e+06	2.50006e+06	1.94573e+06	1.93004e+06	2116092	2.24778e+06	2.53384e+06	2.54758e+06	C00898	ko00630,ko01100
Ysjp000315	130.1	56.05	129.079	C6H11NO2	[M+H]+	Pipecolic acid	Alkaloids	Piperidine alkaloids	535-75-1	2	1.32326e+07	1.29659e+07	1.21683e+07	7.6179e+06	1.62442e+07	5.05118e+06	3.14183e+06	2.24748e+06	4.02897e+06	3.95061e+06	4.55754e+06	4.19948e+06	5.62963e+06	4.95094e+06	5.76525e+06	9.50617e+06	8.3562e+06	8.57307e+06	-	-
MWSHC20170	269.1	59.02	270.11	C13H18O6	[M-H]-	Phenylmethyl β-L-glucopyranoside	Phenolic acids	Phenolic acids	176018-22-7	2	64665.2	110765	38886.8	140458	166618	99613.8	167914	890076	174537	498206	559025	406200	986475	897627	671442	295769	276159	317268	-	-
Lhmp122224	237.19	95.09	236.178	C15H24O2	[M+H]+	rel-(3S,6R,7S)-3,7,11-trimethyl-3,6-epoxy-1-dodecen-7,11-diol	Terpenoids	Sesquiterpenoids	-	3	690600	678858	824452	184866	401200	203836	280478	232090	139266	533074	378238	443101	377946	347145	378110	496716	432355	470736	-	-
pmf0138	179.06	59.01	180.063	C6H12O6	[M-H]-	D-Mannose*	Others	Saccharides	3458-28-4	1	6.55174e+06	5.502e+06	6.59547e+06	4.89917e+06	4.76671e+06	4.60796e+06	968475	841068	801247	1.56923e+06	1.46513e+06	1.54879e+06	1.9345e+06	1.91419e+06	2.30252e+06	3.58795e+06	3.67222e+06	3.21601e+06	C00159	ko00051,ko00052,ko00520,ko01100,ko01250,ko02010
MWSmce713	151.08	106.04	152.084	C9H12O2	[M-H]-	3-(4-Hydroxyphenyl)-1-propanol	Phenolic acids	Phenolic acids	10210-17-0	3	193291	108855	82044.5	103650	317994	107464	188075	240014	219658	365563	331317	374134	587320	459863	540234	347848	324982	302620	-	-
pmp000579	463.12	301.07	462.116	C22H22O11	[M+H]+	Diosmetin-7-O-galactoside	Flavonoids	Flavones	-	1	2.79424e+07	2.54133e+07	5.10119e+07	1.12703e+07	1.44905e+07	1.7039e+07	365591	238450	284345	1.19526e+06	442643	337709	262970	318933	315384	8.16675e+06	7.81647e+06	8.94602e+06	-	-
Zmgp007333	283.1	268.07	282.089	C17H14O4	[M+H]+	7,4'-Di-O-methyldaidzein	Flavonoids	Isoflavones	1157-39-7	1	1.36119e+06	1.26293e+06	747810	42320.7	7989.62	25945	25480.4	58739.4	30857	503616	492374	484642	1.25174e+06	1.04324e+06	1.08122e+06	750848	821105	716938	-	-
mws0178	353.09	191.06	354.095	C16H18O9	[M-H]-	Chlorogenic acid (3-O-Caffeoylquinic acid)*	Phenolic acids	Phenolic acids	327-97-9	1	130154	20737.5	1.16626e+06	7.41813e+06	1.27102e+06	7.73725e+06	57387.2	28447.2	188574	17650.3	15430.3	16397.1	11670	12293.1	4.85087e+06	1.37717e+06	1.20058e+06	1.26589e+06	C00852	ko00940,ko00941,ko00945,ko01110
Hmyp009454	221.19	119.08	220.183	C15H24O	[M+H]+	Nootkatol	Terpenoids	Sesquiterpenoids	50763-67-2	3	79087.5	108230	82210	1.03061e+06	434445	426392	291776	194569	233402	237905	289010	212595	273878	236053	240181	195629	171260	191126	-	-
Lmqp013019	457.37	203.18	456.36	C30H48O3	[M+H]+	3-Hydroxyolean-12-en-29-oic acid (Epikatonic acid)	Terpenoids	Triterpene	564-16-9	2	114964	120402	34659	2677.17	4429.66	22520.7	20820.2	39334.9	27411.1	35567.5	46213.1	49417.1	102714	87845.5	103249	75772.4	78863.2	86659.2	-	-
Lmjp002718	207.14	95.08	206.131	C13H18O2	[M+H]+	Arteannuin A	Terpenoids	Sesquiterpenoids	82442-48-6	1	4.18234e+06	4.6732e+06	4.8464e+06	9.6605e+06	9.26907e+06	1.09833e+07	165577	1.20653e+06	272780	873738	1.0078e+06	472455	480815	834162	848718	2.8569e+06	2.51843e+06	2.56009e+06	-	-
MWS2056	115.08	69.07	114.068	C6H10O2	[M+H]+	Delta-Hexalactone	Others	Lactones	823-22-3	3	3.1278e+06	2.80459e+06	3.40342e+06	3.87179e+06	3.06958e+06	3.14609e+06	3.25679e+06	3.21862e+06	3.11822e+06	3.32703e+06	3.23032e+06	3.32277e+06	5490545	3.17647e+06	5733170	1.55837e+06	1.4188e+06	1.62946e+06	-	-
Zblp005777	314.14	177.06	313.131	C18H19NO4	[M+H]+	N-trans-ferulicacidacylp-hydroxyphenylethylamine	Alkaloids	Phenolamine	-	1	4.19165e+06	2.04367e+06	2.24376e+07	4.73922e+06	2.16097e+07	3.3888e+07	3.06963e+07	3.78041e+07	1.68128e+07	1.91492e+07	1.77641e+07	3.04449e+07	6.88977e+06	7.85406e+06	2.24693e+07	1.29525e+07	1.44363e+07	1.4809e+07	-	-
MWSmce040	153.05	65.04	152.047	C8H8O3	[M+H]+	Isovanillin	Others	Aldehyde compounds	621-59-0	3	1.13129e+06	1.17311e+06	1.17678e+06	994677	1.15677e+06	1.00686e+06	1.32624e+06	3.63625e+06	1.53741e+06	1.40978e+06	1.35776e+06	1.53409e+06	1.42061e+06	1.28905e+06	1.38648e+06	1.23845e+06	1.40542e+06	1.3973e+06	-	-
mws0051	285.08	242.05	284.068	C16H12O5	[M+H]+	Acacetin	Flavonoids	Flavones	480-44-4	1	226497	253509	570913	324835	367405	803754	1.47375e+06	1.19587e+06	5.02779e+06	983497	1.12391e+06	1.71277e+06	807136	783078	4.6981e+06	1.13807e+06	1.2942e+06	1.16303e+06	C01470	ko00944
Lafp002342	243.09	140.05	242.078	C11H14O6	[M+H]+	2,3-Dihydroxy-1-(4-hydroxy-3,5-dimethoxyphenyl)propan-1-one	Phenolic acids	Phenolic acids	33900-74-2	3	425239	287705	228745	728376	1.07976e+06	375500	2.53414e+06	3.0431e+06	2.51375e+06	1.11598e+06	959200	1.17709e+06	528805	754398	652101	928172	820099	928466	-	-
mws0751	213.19	195.18	214.193	C13H26O2	[M-H]-	Tridecanoic Acid	Lipids	Free fatty acids	638-53-9	3	20469.9	13217.3	20908.5	18413	18963.6	16273	15249.7	13290.1	15380.2	17583.5	18220.6	21571.2	16529.7	20714	16845.8	20057.1	18636.2	21444.3	C17076	-
mws0017	146.17	72.08	145.158	C7H19N3	[M+H]+	Spermidine	Alkaloids	Alkaloids	124-20-9	3	1.29135e+06	1.20946e+06	1.34634e+06	1.19895e+06	966595	831046	1.15906e+06	261162	1.41145e+06	2.51101e+06	2.68698e+06	2.79987e+06	3.21877e+06	2.75433e+06	2.75891e+06	2.11694e+06	1.87032e+06	2.11788e+06	C00315	ko00330,ko00410,ko00480,ko00940,ko01100,ko02010
pmb0854	518.32	184.07	517.317	C26H48NO7P	[M+H]+	LysoPC 18:3	Lipids	LPC	-	2	5.2875e+07	6.13475e+07	3.13226e+07	1.58068e+07	1.3515e+07	1.89643e+07	117334	147452	155530	187252	129685	201379	152101	115464	234408	1.14741e+07	1.11367e+07	1.27059e+07	-	-
Wafp002664	293.16	147.04	292.142	C15H20N2O4	[M+H]+	1-O-p-Coumaroyllysine	Alkaloids	Phenolamine	-	3	107265	103140	246554	18612.2	98742.7	66106	271152	165578	244049	275529	158703	267117	104276	114603	144249	178252	196954	172434	-	-
Lssp210422	271.06	153.02	270.053	C15H10O5	[M+H]+	Genistein	Flavonoids	Isoflavones	446-72-0	1	412055	337928	439556	23097.1	10725.4	16268.3	19997.7	20416.5	12011.9	799452	956877	928242	1.15625e+06	1.04207e+06	1.01195e+06	826458	733687	834618	C06563	ko00943,ko01100,ko01110
Wcfn004564	317.1	287.09	318.11	C17H18O6	[M-H]-	E-Stilstatin 3	Others	Others	-	3	129510	148415	234349	210281	268180	261273	2.52034e+06	2.36244e+06	1.8778e+06	1.01701e+06	1.00854e+06	1.14051e+06	725278	699328	884771	570754	630688	655298	-	-
Lhmp093005	827.45	471.35	826.471	C43H70O15	[M+H]+	Methylsoyasaponin A glucuronic acid glucoside(iso-03)	Terpenoids	Triterpene Saponin	-	2	428024	169339	198125	6926.19	4262.39	20005	23340	13340	11670	146745	1176510	464095	29744.9	48124	352105	66930.2	76682.7	69872.3	-	-
Wayp003039	336.2	318.19	335.194	C15H29NO7	[M+H]+	N-(1-Deoxy-1-fructosyl)Aminononanoic acid	Alkaloids	Alkaloids	-	2	825167	464143	601274	233349	289841	218621	552492	732496	96818	642725	320999	584051	1.17006e+06	1.15514e+06	914130	399168	447116	394553	-	-
Wbkp003862	309.09	263.08	308.08	C17H12N2O4	[M+H]+	Flazin	Alkaloids	Alkaloids	100041-05-2	1	531154	611874	565311	235211	237004	160816	3.52735e+07	2.43115e+07	3.28121e+07	8.24158e+07	7.26588e+07	7.81278e+07	8.09612e+07	6.45377e+07	6.19765e+07	3.59295e+07	4.00509e+07	4.11599e+07	-	-
Jmcn007352	249.15	203.14	250.157	C15H22O3	[M-H]-	5α-Hydroxycostic acid	Terpenoids	Sesquiterpenoids	-	3	400880	288524	291560	2.49877e+06	5.02846e+06	3.36987e+06	4.99077e+06	4.98054e+06	6.37024e+06	1.17934e+06	1.23206e+06	1.44034e+06	748153	941770	570942	1.61202e+06	1.42648e+06	1.43264e+06	-	-
Lhmp122210	243.1	197.09	242.094	C15H14O3	[M+H]+	4-(1-phenyl-2-propenyl)benzene-1,3-diol	Others	Others	-	3	368647	1.18384e+06	886134	376988	370195	465102	442501	459545	487211	318061	227264	273119	277246	288617	392837	351447	369608	320992	-	-
Lmzn006582	469.34	469.34	470.34	C30H46O4	[M-H]-	2-Formyl-3-hydroxy-A(1)-norlup-20(29)-en-28-oic acid (Colubrinic acid)	Terpenoids	Triterpene	-	3	738520	2.9574e+06	2.00053e+06	6.04382e+07	4.95857e+07	4.52624e+07	4.88964e+07	5.29724e+07	4.78268e+07	2.43278e+07	3.19442e+07	2.43783e+07	1.5066e+07	4.93236e+07	1.94281e+07	3.82564e+07	3.65285e+07	3.32329e+07	-	-
pmp001287	120.08	103.05	119.073	C8H9N	[M+H]+	N-Benzylmethylene isomethylamine	Alkaloids	Alkaloids	-	3	6.91502e+06	7.27823e+06	9.7123e+06	1.37209e+06	2.1857e+06	668837	8.07371e+06	345130	7.8855e+06	2.0589e+07	2.1314e+07	2.11418e+07	2.33546e+07	2.28217e+07	2.28184e+07	1.54685e+07	1.518e+07	1.72697e+07	-	-
Hmtp000776	168.07	105.03	167.058	C8H9NO3	[M+H]+	4,5,6-Trihydroxy-2-cyclohexen-1-ylideneacetonitrile	Alkaloids	Alkaloids	-	3	2.13403e+06	2.31935e+06	2.73948e+06	413015	621050	161752	2.05372e+06	101584	1.89387e+06	4.88392e+06	4.98474e+06	4.31679e+06	5.15241e+06	4.81756e+06	4.77184e+06	4.40125e+06	4.06816e+06	3.82234e+06	-	-
mws0281	191.02	111.01	192.027	C6H8O7	[M-H]-	Citric Acid	Organic acids	Organic acids	77-92-9	2	1.19882e+07	1.07235e+07	1.05533e+07	1.96981e+07	2.0656e+07	2.34987e+07	69841.7	24584.5	64898.7	43081.1	47243	48781.9	31968.8	24833.1	34567.3	3.22281e+06	3.49498e+06	3.71526e+06	C00158	ko00020,ko00250,ko00630,ko01100,ko01110,ko01200,ko01210,ko01230,ko01240
pmp000004	331.08	316.06	330.074	C17H14O7	[M+H]+	4',5,7-Trihydroxy-3',6-dimethoxyflavone (Jaceosidin)	Flavonoids	Flavones	18085-97-7	3	454945	583147	510009	858082	976129	950326	1.0382e+06	985585	805281	2.61129e+06	2.64582e+06	2.87257e+06	3.21142e+06	3.09646e+06	2.93656e+06	2.02897e+06	2.06916e+06	2.30931e+06	-	-
zjgp122007	287.05	153.02	286.048	C15H10O6	[M+H]+	Maritimetin	Flavonoids	Aurones	576-02-3	3	3.36699e+06	3.23354e+06	9.14591e+06	356039	283994	297387	563844	598589	491381	2.4056e+07	2.46561e+07	2.11346e+07	2.62942e+07	2.47053e+07	2.29392e+07	1.46731e+07	1.67983e+07	1.64253e+07	C08720	-
Wmzn000587	377.24	59.01	378.241	C22H34O5	[M-H]-	DeacetylajugarinⅣ	Terpenoids	Ditepenoids	-	3	50438.7	60769.7	49319.8	7084.25	16945.7	22526.6	19469	16747.4	26390.7	38375.7	35565.6	24611.5	21587	29437.8	24909.2	40985.7	36094.8	40890.2	-	-
mws0920	301.04	151	302.043	C15H10O7	[M-H]-	Tricetin (5,7,3',4',5'-Pentahydroxyflavone)	Flavonoids	Flavones	520-31-0	2	385851	226241	328412	14214.3	39413	21320.7	9	9	9	149170	150770	132268	153620	204740	264087	192948	167386	179129	C10192	ko00941
pmb0496	307.18	177.05	306.169	C15H22N4O3	[M+H]+	N-Feruloylagmatine	Alkaloids	Phenolamine	-	3	2.84612e+06	3.04199e+06	7.52754e+06	166346	165916	490261	240552	148741	305242	3.67438e+06	3.22754e+06	3.51704e+06	997838	926584	1.13362e+06	1.63974e+06	1.79798e+06	1.88981e+06	C18325	ko00999,ko01100,ko01110
Lmyn012331	281.25	281.25	282.256	C18H34O2	[M-H]-	Petroselinic acid*	Lipids	Free fatty acids	593-39-5	1	1.19289e+06	1.24885e+06	702068	1.07231e+06	2.09646e+06	1.05281e+06	2.52407e+06	2.61236e+06	2.35749e+06	3.2936e+06	2.95069e+06	2.63144e+06	2.99705e+06	2.38732e+06	2.50825e+06	2.25275e+06	2.01184e+06	1.98222e+06	C08363	-
MWSmce082	207.06	151.07	206.058	C11H10O4	[M+H]+	Scoparone	Lignans and Coumarins	Coumarins	120-08-1	2	212296	422295	732015	2.64675e+06	3.02455e+06	2.59197e+06	2.52303e+06	2.69953e+06	2.49742e+06	1.79413e+06	1.57983e+06	1.63491e+06	834181	1.02308e+06	2.74735e+06	1.44336e+06	1.4404e+06	1.27079e+06	C09311	ko00999
MWS201434	269.16	156.08	268.154	C12H20N4O3	[M+H]+	Ile-His	Amino acids and derivatives	Amino acids and derivatives	97284-12-3	1	176647	280731	539279	347502	518379	561890	1.2773e+06	664546	1.35808e+06	6.69462e+06	6.03229e+06	7.0988e+06	5.4222e+06	4.79402e+06	6.38165e+06	4.29014e+06	4.80979e+06	4.91191e+06	-	-
Lamp007741	479.13	269.04	478.126	C26H22O9	[M+H]+	Methoxy astrernestin	Others	Lactones	-	2	543419	407031	339673	14214.3	9000.29	5686.84	15547.2	22597.5	15151.4	87667.2	176810	266103	408524	502286	676841	369517	387270	424605	-	-
MWS1837	158.12	95.09	157.11	C8H15NO2	[M+H]+	Tranexamic Acid	Organic acids	Organic acids	1197-18-8	3	1.18147e+07	1.98097e+07	1.12582e+07	540079	310145	368124	448964	596269	462124	2.79457e+06	2.82351e+06	2.57499e+06	3.87817e+06	3.74903e+06	4.01082e+06	3.09788e+06	3.45625e+06	3.55541e+06	-	-
pmb2586	593.13	285.6	594.137	C30H26O13	[M-H]-	Gallocatechin-(4α→8)-catechin	Flavonoids	Flavanols	-	3	135070	849467	960111	5005	7375.43	9	8340	29658.5	1720.19	17400.5	7956.71	24344	8828.53	13108.4	5005	185627	187947	164678	-	-
Lmsp010763	353.27	261.22	352.261	C21H36O4	[M+H]+	Monolinolenin*	Lipids	Glycerol ester	75685-85-7	1	4.46226e+07	4.57139e+07	2.60339e+07	2.55662e+06	4.34025e+06	5.29536e+06	851167	807772	895307	2.72245e+06	2.21281e+06	2.12136e+06	2.09159e+06	3.26308e+06	2.50584e+06	9.47924e+06	9.30718e+06	8.2851e+06	-	-
Wmzn000627	363.25	281.25	364.261	C22H36O4	[M-H]-	Ajugalaevigatic acid	Terpenoids	Ditepenoids	-	3	3.90675e+06	4.01726e+06	2.82957e+06	4.05736e+06	9.92976e+06	5.56381e+06	1.07431e+07	7.4108e+06	1.15062e+07	9.82007e+06	8.96957e+06	9.26838e+06	1.01133e+07	8.3606e+06	8.19931e+06	8.65996e+06	7.51022e+06	8.00052e+06	-	-
pme1373	306.05	110.04	307.057	C9H14N3O7P	[M-H]-	2'-Deoxycytidine-5'-monophosphate	Nucleotides and derivatives	Nucleotides and derivatives	1032-65-1	3	9174.98	10005	14159	1523.95	2128.1	2085.5	27859.1	11969.2	19681.9	78591.2	31730.1	57144.6	110229	82073.5	118479	245878	259263	283137	C00239	ko00240,ko01100,ko01232
Lmbn005822	313.24	223.21	314.246	C18H34O4	[M-H]-	9,10-DHOME; (12Z)-9,10-Dihydroxyoctadec-12-enoic acid	Lipids	Free fatty acids	263399-34-4	3	4395.21	5974.35	2959.07	4797.08	2317.39	3089.85	39849.4	26766.8	30206.6	113169	119370	100041	172241	155973	146074	87424.5	88595.1	77527.6	C14828	ko00591
Jmcn006879	249.15	203.14	250.157	C15H22O3	[M-H]-	5β-Hydroxycostic acid	Terpenoids	Sesquiterpenoids	-	3	3.79199e+06	3.30504e+06	7.04266e+06	934069	1.61625e+06	1.51008e+06	1.51401e+06	1.71095e+06	1.57343e+06	3.48066e+06	3.31664e+06	3.29629e+06	3.72236e+06	3.62124e+06	3.19726e+06	4.24572e+06	4.12193e+06	3.69402e+06	-	-
mws0040	255.07	153.02	254.058	C15H10O4	[M+H]+	Chrysin	Flavonoids	Flavones	480-40-0	2	284291	227821	348411	699604	383970	591629	1.39378e+06	624168	600126	1.17194e+06	1.03238e+06	1.16087e+06	1.181e+06	1.17877e+06	1.06399e+06	795834	865270	750333	C10028	ko00941
Wcgp010223	277.22	93.07	276.209	C18H28O2	[M+H]+	3-(Cyclohexen-1-yl)-2-hydroxy-4a,5-dimethyl-2,3,4,5,6,7,8,8a-octahydronaphthalen-1-one	Others	Others	-	3	935985	911109	1.19174e+06	84642	228206	191561	324631	217582	308982	1.71723e+06	1.39674e+06	1.52667e+06	1.69521e+06	1.54422e+06	1.73632e+06	1.27777e+06	1.43862e+06	1.46233e+06	-	-
pma0461	277.22	93.07	276.209	C18H28O2	[M+H]+	14,15-Dehydrocrepenynic acid	Lipids	Free fatty acids	4154-44-3	3	1.01663e+06	839498	1.33776e+06	90794.1	226358	217241	422766	291925	404922	1.6885e+06	1.61073e+06	1.44248e+06	1.74103e+06	1.72611e+06	1.82274e+06	1.28798e+06	1.47627e+06	1.4478e+06	-	-
mws0267	105.02	105.02	106.027	C3H6O4	[M-H]-	DL-Glyceric Acid	Organic acids	Organic acids	473-81-4	3	1.7421e+06	1.24135e+06	1.30715e+06	1.13473e+06	1.39226e+06	1.05262e+06	228692	181752	103186	656096	545301	632751	599988	622391	807176	814521	938745	858614	C00258	ko00030,ko00260,ko00561,ko00630,ko01100,ko01110,ko01200
Wmjp005994	344.15	177.05	343.142	C19H21NO5	[M+H]+	2-propenamide	Alkaloids	Alkaloids	-	1	6.0594e+06	1.69673e+06	2.69105e+06	1.09671e+06	6.09443e+06	1.25637e+07	2.29013e+07	1.77825e+07	7.75913e+06	1.03356e+07	3.00358e+06	4.46977e+06	1.95787e+06	3.06088e+06	3.10438e+07	6.53167e+06	7.06862e+06	7.55151e+06	-	-
pma0948	138.09	120.08	137.084	C8H11NO	[M+H]+	Phenylethanolamine	Alkaloids	Alkaloids	7568-93-6	3	1.74959e+06	1.71546e+06	986867	197781	982061	419934	1.99011e+06	1.66789e+06	1.81898e+06	2.15222e+06	2.52726e+06	2.13352e+06	3.05e+06	2.47658e+06	3.43575e+06	2.75508e+06	2.5186e+06	2.39054e+06	C02735	-
mws1587	132.1	86.1	131.095	C6H13NO2	[M+H]+	L-Norleucine*	Amino acids and derivatives	Amino acids and derivatives	327-57-1	1	8.78112e+06	9.48426e+06	1.04125e+07	1.85036e+06	4.16597e+06	840475	9.79114e+06	3.40635e+06	8.58544e+06	1.54742e+07	1.61969e+07	1.45369e+07	1.66366e+07	1.48654e+07	1.6678e+07	1.59432e+07	1.46341e+07	1.38067e+07	C01933	-
Lmxp000939	136.06	119.04	135.054	C5H5N5	[M+H]+	Zarzissine	Alkaloids	Alkaloids	160568-14-9	3	1.60762e+06	911362	3.06509e+06	224959	1.76113e+06	309867	2.25976e+06	2.01537e+06	2.62448e+06	1.53013e+06	1.76127e+06	1.84732e+06	1.19958e+06	1.41797e+06	2.09293e+06	2.28841e+06	2.51278e+06	2.64637e+06	-	-
pme0124	173.09	116.07	172.085	C7H12N2O3	[M+H]+	L-Glycyl-L-proline	Amino acids and derivatives	Amino acids and derivatives	704-15-4	3	2.53715e+06	1.9449e+06	4.14711e+06	670704	2.54599e+06	597780	1.0559e+06	944981	819714	507027	504027	643866	428887	496085	668680	1.04165e+06	950855	902751	-	-
Zblp002839	167.07	123.05	166.063	C9H10O3	[M+H]+	3-(3-Hydroxyphenyl)-propionic acid	Phenolic acids	Phenolic acids	621-54-5	2	381392	295044	473930	1.30401e+06	1.58827e+06	1.74514e+06	1.83586e+06	1.22969e+06	1.56949e+06	997692	1.15912e+06	1.01374e+06	592137	797312	924016	777358	804247	697482	C11457	ko00360,ko01100
Lmhn003240	237.04	121.03	238.048	C11H10O6	[M-H]-	Benzoylmalic acid	Phenolic acids	Phenolic acids	22138-51-8	1	1.16861e+08	1.28498e+08	1.87577e+08	1.22793e+06	1.48034e+06	2.4688e+06	148638	122532	116876	130085	117329	123901	109292	62122.4	208766	3.8523e+07	3.33669e+07	3.70451e+07	-	-
pme0075	188.06	128.04	189.064	C7H11NO5	[M-H]-	N-Acetyl-L-glutamic acid	Amino acids and derivatives	Amino acids and derivatives	1188-37-0	3	833857	805030	469760	922504	1.90133e+06	637894	4.07708e+06	2.04603e+06	2910427	3.01483e+06	3.37225e+06	3.60199e+06	4.72176e+06	3.26796e+06	4.69896e+06	3.06578e+06	2.65291e+06	2.81382e+06	C00624	ko00220,ko00470,ko01100,ko01110,ko01210,ko01230
Lmgp003989	499.13	163.04	498.116	C25H22O11	[M+H]+	Dicaffeoylshikimic acid	Phenolic acids	Phenolic acids	-	1	55287.5	21675	143777	7.01386e+07	1.241e+07	6.60541e+07	7.46401e+06	7.08334e+06	2.6818e+07	361825	287276	850714	125201	186185	4.39204e+06	8.10644e+06	9.34961e+06	8.51576e+06	-	-
Lmzn001582	387.17	207.1	388.173	C18H28O9	[M-H]-	5'-Glucosyloxyjasmanic acid	Phenolic acids	Phenolic acids	-	1	1.51321e+06	1.40425e+06	2.41199e+06	2.08527e+06	2.17809e+06	2.40064e+06	65796.4	26675	29823.9	10817.1	108179	75546.4	41168.3	57921.9	87816	675069	777932	754365	-	-
Lhcp090204	193.16	109.07	192.151	C13H20O	[M+H]+	β-Ionone	Others	Ketone compounds	79-77-6	3	9	9	9	27762.7	137125	60629.1	316274	828562	278848	1.89965e+06	2.02807e+06	1.77893e+06	2.04852e+06	1.68233e+06	1.84572e+06	1.34862e+06	1.16607e+06	1.24073e+06	C12287	-
pme2559	174.04	88.04	175.048	C6H9NO5	[M-H]-	N-Acetyl-L-Aspartic Acid	Amino acids and derivatives	Amino acids and derivatives	997-55-7	3	236914	262747	98209.5	116449	660574	142645	600434	523002	557769	1.32592e+06	1.27356e+06	1.01871e+06	1.90132e+06	1.78992e+06	1.84493e+06	936018	1.07808e+06	1.04944e+06	C01042	ko00250,ko01100
MWS5169	172.04	128.05	173.048	C10H7NO2	[M-H]-	Quinoline-4-carboxylic acid	Alkaloids	Quinoline alkaloids	486-74-8	3	360329	412565	194652	154983	195265	165907	166671	554892	172371	226984	240390	226804	332184	299329	307425	253634	258774	290039	C06414	-
Zmdn004052	431.1	269.05	432.106	C21H20O10	[M-H]-	Aloe emodin-1-O-glucoside	Quinones	Anthraquinone	-	3	205076	200831	143728	303744	401323	360732	331373	345292	354196	444805	257408	427607	150749	317919	176632	249248	226684	262566	-	-
Wmbn000550	375.21	291.21	376.225	C22H32O5	[M-H]-	Ajugarin V	Terpenoids	Ditepenoids	82231-14-9	3	184659	252978	148187	17907	28072.5	18895.5	20727.7	17195.9	17195.9	75954.2	90012.7	67554.6	118500	83789.7	95125.5	105705	121844	118401	-	-
Lmyp102101	113.02	67.02	112.016	C5H4O3	[M+H]+	3-Hydroxy-4H-pyran-4-one	Organic acids	Organic acids	-	3	120940	121390	96607.7	115156	230205	124666	568562	144283	603620	346540	428010	333435	340415	386719	399993	396230	353296	346529	-	-
pme2743	194.08	91.05	193.074	C10H11NO3	[M+H]+	N-Phenylacetylglycine	Amino acids and derivatives	Amino acids and derivatives	500-98-1	3	380092	192083	229729	129347	280280	246885	180120	143959	137695	235886	362130	267186	255354	290920	420625	270710	309680	276298	C05598	ko00360
pmb0508	277.17	147.04	276.159	C14H20N4O2	[M+H]+	p-Coumaroylagmatine	Alkaloids	Phenolamine	7295-86-5	2	519936	357690	98467.1	61685	55015	45033.8	188551	173701	260610	121502	225633	432148	114857	1.1597e+06	582691	211909	241526	214349	C04498	ko00999,ko01100,ko01110
MWS1798	113.06	67.05	112.052	C6H8O2	[M+H]+	2,4-Hexadienoic acid	Organic acids	Organic acids	110-44-1	3	130576	169972	48181.4	125582	181118	148803	577120	192247	413766	406629	350025	353663	368702	370118	361168	388311	336530	352221	-	-
mws0712	130.05	86.06	131.058	C5H9NO3	[M-H]-	N-Propionylglycine	Amino acids and derivatives	Amino acids and derivatives	21709-90-0	3	371861	351102	377574	372993	527054	375248	308355	160376	314092	246185	213408	173458	229328	129760	201235	258932	223198	241886	-	-
YC512118	282.28	247.24	281.272	C18H35NO	[M+H]+	Oleamide (9-Octadecenamide)	Lipids	Free fatty acids	301-02-0	3	19805.2	13091.4	20189.8	12618.1	74268.4	71843.7	35921	46929.7	64217.6	25092.9	24999.3	32388.8	42406.8	27761.5	47626	851112	857351	748715	C19670	-
Zbzp007397	181.12	135.12	180.115	C11H16O2	[M+H]+	5,6,7,7a-tetrahydro-4,4,7a-trimethyl-2(4H)-benzofuranone	Others	Others	15356-74-8	1	4.7786e+06	4.15922e+06	5.59149e+06	2.08156e+06	2.35092e+06	3.23621e+06	4.26521e+06	7.08648e+06	4.51649e+06	7.17767e+06	7.27817e+06	6.6532e+06	7.77771e+06	6.83562e+06	5.96102e+06	6.45475e+06	5.81473e+06	5.60242e+06	-	-
Latp007251	291.19	151.07	290.188	C18H26O3	[M+H]+	Normelanothyrsin A	Terpenoids	Sesquiterpenoids	-	3	2.03736e+06	2.33025e+06	4.63976e+06	147745	201989	207681	128489	123536	137943	136605	175246	121995	154775	147630	145303	684115	651538	589966	-	-
Smsp110188	235.17	147.08	234.162	C15H22O2	[M+H]+	isopolygodial	Terpenoids	Sesquiterpenoids	-	3	9	9	9	171550	285467	246397	513212	720999	2.50714e+06	195470	383840	204555	329156	266849	159018	347286	300225	316187	-	-
Hmsn002598	301.09	139.04	302.1	C13H18O8	[M-H]-	Salirepin	Phenolic acids	Phenolic acids	26652-12-0	3	2.42208e+06	3.26758e+06	3.4422e+06	1.49329e+06	1.47809e+06	2.04694e+06	494625	444655	510273	121425	121138	137393	138438	162367	190103	992320	1.00209e+06	874068	-	-
Wcdp006741	520.34	184.08	519.332	C26H50NO7P	[M+H]+	1-(9Z,12Z-Octadecadienoyl)-Sn-Glycero-3-Phosphocholine	Others	Others	22252-07-9	3	5.14926e+07	4.13001e+07	8.29314e+07	5.74026e+07	8.59572e+07	4.13545e+07	791762	1.10953e+06	2.18779e+06	1.77872e+06	4.69616e+06	2.07912e+06	2.87482e+06	1.82891e+06	9.54602e+06	4.23277e+07	4.8732e+07	4.77676e+07	-	-
pme1194	228.1	112.05	227.091	C9H13N3O4	[M+H]+	2'-Deoxycytidine	Nucleotides and derivatives	Nucleotides and derivatives	951-77-9	3	570284	367253	802570	160151	252336	146911	207004	70587.1	207966	335251	280909	195475	451291	121856	153945	451363	518842	510992	C00881	ko00240,ko01100,ko01232,ko02010
Lmhp009034	452.28	311.26	451.27	C21H42NO7P	[M+H]+	LysoPE 16:1*	Lipids	LPE	-	1	1.78434e+07	2.12569e+07	1.43481e+06	3.08653e+06	5.81301e+06	7.70443e+06	119046	4.43793e+06	103209	82076.6	97746.3	84391	138773	34958.8	119554	2.60952e+06	2.65216e+06	2.98485e+06	-	-
WaYp005128	262.24	200.2	261.23	C14H31NO3	[M+H]+	2-Aminotetradecane-1,5,13-triol	Lipids	Sphingolipids	-	2	3.33546e+06	2.96442e+06	2.9541e+06	3.09791e+06	2.96328e+06	3.55394e+06	3.59428e+06	4.0115e+06	3.27851e+06	3.45144e+06	3.47985e+06	3.1891e+06	511158	2.89379e+06	3.80901e+06	4.02658e+06	3.7935e+06	4.39732e+06	-	-
Lmcn009122	253.217	235.209	254.225	C16H30O2	[M-H]-	(7Z)-Hexadecenoic acid*	Lipids	Free fatty acids	2416-19-5	2	77118.4	83618	17890.2	15468.3	204584	24767.8	67793.4	95958.9	76598	132718	120998	118561	144102	101445	122435	108399	119374	103216	-	-
Hmgp002327	188.07	118.06	187.063	C11H9NO2	[M+H]+	3-amino-2-naphthoic acid	Alkaloids	Alkaloids	-	1	3.28988e+06	2.46865e+06	4.6864e+06	4.27089e+06	2.34244e+06	3.16046e+06	2.32036e+06	42307.5	2.69722e+06	7.89553e+06	7.94619e+06	7.62126e+06	9.79625e+06	8.937e+06	9.23057e+06	6.36397e+06	5.78068e+06	6.71807e+06	-	-
pmp001204	299.09	284.07	298.084	C17H14O5	[M+H]+	Apigenin-7,4'-dimethyl ether	Flavonoids	Flavones	5128-44-9	3	389665	397312	506407	151209	200253	381285	273956	217858	266647	269064	270342	264926	314140	250147	247191	260829	303378	281431	C10019	-
pme1201	273.08	167.03	274.084	C15H14O5	[M-H]-	Phloretin	Flavonoids	Chalcones	60-82-2	3	23027.4	43503.7	119031	22052	37190.1	30841.5	191830	38378	218796	401542	225904	303979	166436	134742	175593	167715	156622	144082	C00774	ko00941,ko01100,ko01110
pme3188	323.03	211	324.036	C9H13N2O9P	[M-H]-	Uridine 5'-monophosphate	Nucleotides and derivatives	Nucleotides and derivatives	58-97-9	3	856575	574460	705327	123132	684098	257309	95606.7	97472.9	99700.1	69294.7	97403.9	132848	160524	55823.4	64624.5	198595	172977	197002	C00105	ko00240,ko01100,ko01232,ko01240
Lmgn002679	93.03	75.02	94.0419	C6H6O	[M-H]-	Phenol	Phenolic acids	Phenolic acids	108-95-2	3	1.70169e+06	1.82945e+06	1.8434e+06	121804	199698	155646	1.41597e+06	1.37811e+06	1.35246e+06	5.68532e+06	5.73597e+06	5.41867e+06	7.01087e+06	7.679e+06	7.02972e+06	4.60325e+06	4.02757e+06	4.06951e+06	C00146	ko00350,ko01100
Zasp102439	118.06	91.05	117.058	C8H7N	[M+H]+	m-Aminophenylacetylene	Alkaloids	Alkaloids	54060-30-9	1	1.73969e+07	1.59149e+07	2.39289e+07	2.14168e+07	1.41086e+07	1.60055e+07	1.28541e+07	2.61589e+06	1.37969e+07	2.95092e+07	2.85683e+07	2.79301e+07	3.28011e+07	2.90946e+07	2.99159e+07	2.71051e+07	2.44851e+07	2.34193e+07	-	-
mws0444	152.04	108.05	153.043	C7H7NO3	[M-H]-	3-Aminosalicylic acid	Phenolic acids	Phenolic acids	570-23-0	3	1.08297e+06	1.15514e+06	573860	472187	1.72333e+06	286170	2.68654e+06	3.49269e+06	3.41523e+06	4.88507e+06	5.08032e+06	5.37571e+06	6.72295e+06	5.51056e+06	5.71752e+06	4.68053e+06	4.31833e+06	4.02255e+06	-	-
Zajp007311	373.13	343.08	372.121	C20H20O7	[M+H]+	3',4',5',5,7-Pentamethoxyflavone*	Flavonoids	Flavones	53350-26-8	3	7.41595e+06	8.04475e+06	7.95286e+06	7.58285e+06	7.64991e+06	8.07785e+06	7.83818e+06	7.7576e+06	7.96678e+06	8.14462e+06	8.16167e+06	7.61866e+06	7.38761e+06	7.87462e+06	7.16353e+06	7.19923e+06	8.3271e+06	7.50584e+06	-	-
Lmmp003767	463.09	287.05	462.08	C21H18O12	[M+H]+	Kaempferol-7-O-glucuronide	Flavonoids	Flavonols	-	2	7.50613e+06	6.78799e+06	1.52232e+07	99193.6	106710	160095	75553.2	51680	35371	1.68597e+06	1.96776e+06	1.73407e+06	656175	776701	1.32853e+06	3.45726e+06	3.56782e+06	3.98674e+06	-	-
mws0028	167.03	108.02	168.042	C8H8O4	[M-H]-	Vanillic acid	Phenolic acids	Phenolic acids	121-34-6	1	5.34386e+06	3.99342e+06	3.97197e+06	1.27693e+06	2.16403e+06	2.49563e+06	1.22898e+07	1.75061e+07	1.22352e+07	1.71693e+07	1.77036e+07	1.98618e+07	1.6423e+07	1.82926e+07	1.67715e+07	1.22852e+07	1.10003e+07	1.065e+07	C06672	-
Lmqn001795	267.07	249.05	268.074	C16H12O4	[M-H]-	5-Hydroxy-7-methoxyflavone	Flavonoids	Flavones	-	3	21913.4	30384	22434.1	43345	73355	155048	189771	188739	375583	149939	129647	160779	153539	126430	61685	170348	146542	155624	-	-
mws0640	117.06	71.05	118.063	C5H10O3	[M-H]-	2-Hydroxy-2-methylbutyric acid	Organic acids	Organic acids	3739-30-8	1	56214.8	134019	11693.3	117834	709984	119181	835604	1.14653e+06	791938	679191	694092	679348	616181	592772	497584	495989	449532	427442	-	-
pma3649	132.07	86.06	131.058	C5H9NO3	[M+H]+	5-Aminolevulinic Acid	Alkaloids	Alkaloids	106-60-5	3	5.99176e+06	7.12678e+06	7.48355e+06	1.84613e+06	2.64776e+06	769299	6.11887e+06	3.22093e+06	5.1859e+06	8.95966e+06	1.02644e+07	9.13429e+06	1.64784e+07	8.913e+06	1.49787e+07	1.06357e+07	9.49122e+06	9.2269e+06	C00430	ko00260,ko00860,ko01100,ko01110,ko01240,ko02010
Zmdn004104	233.05	189.06	234.053	C12H10O5	[M-H]-	2-methyl-5-carboxy methyl-7-Hydroxy-chromone	Others	Chromone	-	3	451621	2.2951e+06	1.3841e+06	104052	235200	181790	241285	264543	297371	2.97398e+06	2.60544e+06	2.57271e+06	1.67007e+06	1.14911e+06	893828	1.16411e+06	1.04368e+06	1.00727e+06	-	-
MWS4285	89.02	71.02	90.0317	C3H6O3	[M-H]-	L-Lactic Acid	Organic acids	Organic acids	79-33-4	3	114738	186008	92516.1	241494	705898	253622	3.68105e+06	249223	3.67687e+06	3.08278e+06	3.29247e+06	3.21718e+06	2.9676e+06	2.81939e+06	2.87329e+06	2.76161e+06	2.47754e+06	2.38853e+06	C00186	ko00010,ko00051,ko00620,ko00640,ko01100,ko01110
[truncated: 975 more rows]
