# Supplementary material for: Influence on the fermentation quality, microbial diversity, and metabolomics in the ensiling of sunflower stalks and alfalfa
Source: Front Plant Sci. 2024 Jan 26;15:1333207. doi: 10.3389/fpls.2024.1333207 (PMC10853385; doi:10.3389/fpls.2024.1333207)
Supplement: Supplementary file 2 [file Table_2.xlsx]

## Sheet: Sheet1
Index	Formula	Compounds	Class I	Class II	CAS	Level	A_1	A_2	A_3	S_1	S_2	S_3	VIP	P-value	FDR	Fold_Change	Log2FC	Type
Lmyn004949	C15H10O5	3,7,3'-Trihydroxyflavone	Flavonoids	Flavones	-	2	1.20802e+06	1.43106e+06	1.43362e+06	78483.5	46277.9	77778	1.26752	0.00286089	0.0409942	0.049731	-4.32971	down
Lmxn007955	C18H16O8	Sudachitin	Flavonoids	Flavones	4281-28-1	3	33151.3	38324.5	37566.1	2.24319e+07	2.19913e+07	2.42996e+07	1.27621	0.000955561	0.0289051	630.242	9.29976	up
Lmdp007998	C18H16O7	Xanthomicrol (5,4'-Dihydroxy-6,7,8-trimethoxyflavone)*	Flavonoids	Flavones	16545-23-6	1	3855.26	6705.1	1930.52	1.19478e+06	1.57932e+06	1.54322e+06	1.26695	0.00721603	0.0594363	345.638	8.43312	up
Lman002117	C15H18O9	Grevilloside Q	Others	Ketone compounds	1708967-64-9	3	2.04425e+06	2.2842e+06	1.96212e+06	254150	130246	237191	1.25542	0.000778223	0.0262188	0.0988125	-3.33916	down
Zmhn001926	C13H16O8	1-O-Salicyloyl-β-D-glucose	Phenolic acids	Phenolic acids	60517-74-0	1	1.70325e+07	2.34769e+07	2.5008e+07	3.85697e+06	3.38088e+06	4.63314e+06	1.25825	0.0164661	0.0849616	0.181188	-2.46444	down
Lmmn000774	C15H20O9	Dihydrocaffeoylglucose	Phenolic acids	Phenolic acids	-	3	1.30248e+06	1.03562e+06	2.29279e+06	1.22322e+07	8.61188e+06	1.11398e+07	1.23428	0.00762559	0.0606283	6.90664	2.78798	up
Lmdp007826	C18H16O7	5,6-Dihydroxy-7,3',4'-Trimethoxyflavone	Flavonoids	Flavones	-	1	38403.1	52789.8	54046.6	3.00959e+07	3.66772e+07	4.58061e+07	1.27463	0.0144517	0.0796586	775.128	9.59829	up
pmn001689	C18H32O4	9-Hydroxy-12-oxo-15(Z)-octadecenoic acid	Lipids	Free fatty acids	-	3	1.21697e+07	1.22671e+07	1.34473e+07	772083	1.03678e+06	1.7564e+06	1.25248	4.89999e-05	0.0101661	0.0941099	-3.40951	down
Zadn009075	C18H32O4	Hydroperoxylinoleic acid	Lipids	Free fatty acids	34444-18-3	2	1.21697e+07	1.22671e+07	1.34473e+07	772083	1.03678e+06	1.7564e+06	1.25248	4.89999e-05	0.0101661	0.0941099	-3.40951	down
mws0014	C10H10O4	Ferulic acid*	Phenolic acids	Phenolic acids	537-98-4	2	2.54264e+07	1.75763e+07	2.92316e+07	940979	1.98442e+06	1.59667e+06	1.25392	0.0216374	0.0956056	0.0626028	-3.99763	down
Wasn006047	C21H36O9	Glucosyl 10,11-dihydroxy-2,6-farneSadienoate	Others	Others	-	2	1.96103e+06	2.20234e+06	1.59124e+06	2.85969e+07	2.4219e+07	2.87626e+07	1.27227	0.00308878	0.0426695	14.1762	3.8254	up
Hmsp000364	C7H13NO2	L-Cyclopentylglycine	Amino acids and derivatives	Amino acids and derivatives	2521-84-8	2	5.89011e+07	5.91494e+07	5.36748e+07	1.55001e+06	2.51938e+06	1.6654e+06	1.27118	0.000774814	0.0262188	0.0333951	-4.90422	down
MWS201465	C14H18N2O5	Glu-Phe	Amino acids and derivatives	Amino acids and derivatives	20556-22-3	1	1.49685e+07	1.29525e+07	2.33833e+07	492744	2.98819e+06	584454	1.17663	0.0322014	0.112901	0.0792406	-3.65762	down
Zbfn002690	C13H16O8	1-(4-Hydroxybenzoyl)Glucose; 25545-07-7	Phenolic acids	Phenolic acids	-	1	1.01634e+08	1.29797e+08	1.42632e+08	1.88163e+07	1.58906e+07	2.36831e+07	1.26045	0.0108864	0.0683471	0.156097	-2.67949	down
Lmmp004269	C37H34O21	Luteolin-7-O-glucuronide-(2→1)-(2''-Feruloyl)glucuronide	Flavonoids	Flavones	-	2	5.19543e+06	8761640	1.0585e+07	63739.4	21710.5	11084.4	1.25344	0.0357061	0.119372	0.00393342	-7.99	down
Laxp008852	C17H14O5	(2Z)-2-(3,4-Dimethoxybenzylidene)-6-Hydroxy-1-Benzofuran-3(2H)-One	Flavonoids	Other Flavonoids	1322574-14-0	1	1.93067e+07	2.05957e+07	1.48753e+07	147480	111273	109621	1.27428	0.00899852	0.0640576	0.00672489	-7.21627	down
Lmbn000193	C3H4O4	Tartronate semialdehyde	Organic acids	Organic acids	2480-77-5	3	3.11337e+07	3.58913e+07	3.15052e+07	2.8952e+06	5.63459e+06	3.54318e+06	1.25429	0.000410534	0.018942	0.122531	-3.02879	down
pmb2871	C13H16O9	1-O-Gentisoyl-β-D-glucoside*	Phenolic acids	Phenolic acids	23445-11-6	1	5.46368e+06	3.65444e+06	1.15568e+07	6.67549e+07	6.37541e+07	8.79971e+07	1.22627	0.00826991	0.0615441	10.5687	3.40172	up
MWSmce415	C17H14O6	Cirsimaritin (4',5-dihydroxy-6,7-dimethoxyflavone)*	Flavonoids	Flavones	6601-62-3	2	189653	265354	293588	3.36511e+06	3.94752e+06	4.65642e+06	1.26712	0.00944262	0.0646719	15.9887	3.99898	up
pmn001571	C18H18O5	Agrimonolide	Lignans and Coumarins	Coumarins	21499-24-1	3	8.81943e+06	5.86815e+06	1.05028e+07	93832.3	54258	426917	1.22053	0.0254444	0.101751	0.0228264	-5.45315	down
mws0905	C16H14O4	Medicarpin	Flavonoids	Isoflavones	32383-76-9	1	2.76974e+06	2.09162e+06	1.60567e+06	16092.9	10163.6	16129.5	1.27133	0.0239533	0.0993653	0.00655416	-7.25337	down
Yacn003968	C11H13NO3	Cantleyine	Alkaloids	Alkaloids	30333-81-4	1	3.69643e+07	5.50564e+07	3.49135e+07	2.63263e+06	2.94411e+06	2.31743e+06	1.26798	0.0249636	0.101751	0.062191	-4.00715	down
Labn002602	C19H26O14	chinenionside B	Phenolic acids	Phenolic acids	-	3	746275	777287	669518	47772.1	98685.6	79432.9	1.25431	0.000490541	0.020957	0.103002	-3.27926	down
mws1189	C6H10O7	D-Galacturonic acid*	Others	Saccharides	685-73-4	1	9.86038e+06	7.96727e+06	1.41054e+07	659871	881959	525975	1.25976	0.031308	0.111551	0.0647543	-3.94888	down
Layp007325	C15H12O4	Bauhinoxepin J	Others	Alcohol compounds	942513-05-5	3	4.04875e+07	4.24084e+07	1.97446e+07	1.75984e+06	1.43183e+06	1.689e+06	1.25761	0.0461464	0.136778	0.0475512	-4.39437	down
mws1060	C10H12N4O5	9-(Arabinosyl)hypoxanthine	Nucleotides and derivatives	Nucleotides and derivatives	7013-16-3	1	2.931e+07	2.6583e+07	4.4597e+07	2.06309e+06	1.86499e+06	1.52339e+06	1.26672	0.02983	0.107931	0.054249	-4.20426	down
Lmmp007480	C15H12O4	2,4,4'-trihydroxychalcone*	Flavonoids	Chalcones	-	1	4.35984e+07	4.16531e+07	2.07218e+07	1.69704e+06	1.3922e+06	1.76989e+06	1.25859	0.0440736	0.13395	0.0458525	-4.44686	down
Lmjn005592	C18H16O7	Cirsilineol (4',5-Dihydroxy-3',6,7-trimethoxyflavone)	Flavonoids	Flavanones	41365-32-6	1	81190.1	140600	261829	1.848e+07	2.10947e+07	2.41074e+07	1.26343	0.00586164	0.0546017	131.678	7.04087	up
Lmdn004802	C47H76O17	Soyasaponin II	Terpenoids	Triterpene Saponin	55319-36-3	2	1.9742e+06	1.97815e+06	1.85897e+06	153008	206335	460870	1.21733	0.000987073	0.0289051	0.14114	-2.8248	down
pme3705	C6H10O7	D-Glucoronic acid*	Others	Saccharides	6556-12-3	1	9.11008e+06	7.32561e+06	1.35916e+07	779557	859054	619316	1.26061	0.0380652	0.123338	0.0751958	-3.7332	down
Lmmn005092	C47H72O20	Medicagenic acid-3-O-glucuronide-28-O-rhamnosyl(1,2)-arabinoside	Terpenoids	Triterpene Saponin	-	2	2.10631e+07	3.38181e+07	2.14452e+07	40712.2	24027.7	47632.8	1.27268	0.0261329	0.103122	0.00147227	-9.40775	down
Hmhp007382	C19H18O7	5-Hydroxy-7,8,2',6'-Tetramethoxyflavone (Altisin)*	Flavonoids	Flavones	-	2	12191.2	57340.8	13404.9	8.53925e+06	9.96943e+06	9.912e+06	1.25925	0.00241933	0.0402681	342.678	8.42071	up
pma0149	C15H16O9	Sinapoyl malate	Phenolic acids	Phenolic acids	92344-58-6	3	1.80468e+06	1.73763e+06	2.1735e+06	145377	145818	165359	1.27421	0.00582916	0.0546017	0.0798757	-3.6461	down
Lcsn006335	C14H28O3	2-Hydroxymyristic acid	Organic acids	Organic acids	2507-55-3	1	8.80441e+06	1.01597e+07	6.05124e+06	829315	1.23695e+06	1.02393e+06	1.25472	0.0253574	0.101751	0.123532	-3.01704	down
Lmjn005765	C15H22O3	Dihydro-epi-arteannuin B	Terpenoids	Sesquiterpenoids	-	2	29686.5	31512.7	29576.4	210362	265623	198801	1.27137	0.0109778	0.0684071	7.43356	2.89405	up
Walp006014	C20H18O8	Clemiscosin A	Lignans and Coumarins	Coumarins	-	1	517728	490459	1.20187e+06	8.11829e+06	5.67623e+06	6.65506e+06	1.23218	0.00810974	0.0612837	9.25297	3.20992	up
Lmqn009304	C19H18O5	Eucalyptin (5-Hydroxy-7,4'-dimethoxy-6,8-dimethylflavone)	Flavonoids	Flavanones	3122-88-1	3	4.07843e+06	5.17279e+06	2.90838e+06	90592.4	153269	100916	1.26556	0.0263827	0.103497	0.0283543	-5.14029	down
Hahn002259	C37H50O21	kurroaoside C	Others	Others	-	2	343394	374614	476330	9	9	9	1.27638	0.0100106	0.0660074	2.26067e-05	-15.4329	down
pmf0557	C16H11N2NaO4S	Orange I	Alkaloids	Alkaloids	523-44-4	2	1.40301e+07	1.96407e+07	1.17709e+07	1.06699e+06	1.8338e+06	1.12974e+06	1.25433	0.0264504	0.103497	0.088697	-3.49497	down
mws1405	C15H8O5	Coumestrol	Lignans and Coumarins	Coumarins	479-13-0	2	1.34556e+07	9.45927e+06	1.10944e+07	51632.1	10831.4	34811.1	1.26053	0.0103606	0.0664674	0.00286024	-8.44965	down
Zmdn005358	C20H22O7	Vladinol D	Lignans and Coumarins	Lignans	-	3	580433	253500	306640	3.63854e+06	2.89111e+06	5.02722e+06	1.23823	0.028353	0.106014	10.1325	3.34092	up
mws1178	C16H16O4	Vestitol	Flavonoids	Other Flavonoids	35878-41-2	1	558773	570069	428701	13612.5	9245.65	8046.87	1.2706	0.00778465	0.0606729	0.0198422	-5.65529	down
Wbmn009893	C22H34O6	3-Acetoxy-9,13-epoxy-16-hydroxy-labda-15,16-olide	Terpenoids	Ditepenoids	-	2	20357	32970	29971.9	9	9	9	1.27581	0.0182721	0.0869148	0.000324134	-11.5911	down
Lmjp007279	C19H18O7	Penduletin 4'-Methyl Ether (5-Hydroxy-3,6,7,4'-Tetramethoxyflavone)	Flavonoids	Flavones	14787-34-9	3	14452.4	74183.6	20774.6	4.94794e+06	5.18892e+06	5.82089e+06	1.25357	0.00231322	0.0402681	145.852	7.18836	up
Smhp011040	C19H18O7	ageconyflavone B	Flavonoids	Flavones	-	2	10160.6	4671.01	10556.2	2.37838e+06	2.42368e+06	2.87389e+06	1.27082	0.00382026	0.04742	302.348	8.24006	up
mws1177	C16H12O5	Maackiain	Flavonoids	Isoflavones	2035-15-6	2	371752	278451	185393	3427.23	2774.61	8732.54	1.25239	0.0364242	0.120216	0.0178727	-5.8061	down
Zbqp002414	C11H20N2O5	h-gamma-Glu-leu-oh	Amino acids and derivatives	Amino acids and derivatives	-	1	3.58249e+06	3.79832e+06	2.80998e+06	199822	892772	311290	1.17817	0.00203841	0.0388646	0.13776	-2.85977	down
MWS3149	C8H8O3	3-Methoxybenzoic acid	Phenolic acids	Phenolic acids	586-38-9	2	133792	170177	115160	2.28431e+06	4.39922e+06	2.99128e+06	1.26381	0.038197	0.123418	23.0831	4.52877	up
pme3440	C15H12O5	Butein	Flavonoids	Chalcones	487-52-5	3	1.81809e+06	2.12235e+06	1.16424e+06	30029	99833.4	158647	1.20697	0.0278841	0.10563	0.0565185	-4.14513	down
Sadn007155	C17H18O3	4-(hydroxymethyl)-1,8-dimethyl-9,10-dihydrophenanthrene-2,7-diol	Terpenoids	Ditepenoids	-	2	912943	813561	962210	54466.5	43083.4	39099.7	1.27285	0.00240087	0.0402681	0.0508234	-4.29836	down
HX1332	C19H30O2	Roupelliol(ISO1)	Others	Others	-	3	5.53738e+07	5.14933e+07	5.44278e+07	2.66598e+06	3.66162e+06	7.01658e+06	1.24697	1.09316e-05	0.00840638	0.0827316	-3.59542	down
Lajn006059	C18H20O6	7,4'-Dihydroxy-8,2',3'-trimethoxyisoflavan	Flavonoids	Other Flavonoids	-	2	2.09593e+06	983828	1.3556e+06	8652.55	3640.49	9588.19	1.2638	0.0459808	0.136757	0.00493337	-7.66321	down
Cmmn012997	C20H30O2	Abietic acid*	Terpenoids	Ditepenoids	514-10-3	2	175867	130596	123245	6.50871e+06	4.70529e+06	4.36141e+06	1.27169	0.0169079	0.0854364	36.2465	5.17977	up
Lmtn002796	C21H22O11	Aromadendrin-7-O-glucoside	Flavonoids	Flavanonols	28189-90-4	2	1.84249e+06	2.14847e+06	1.79416e+06	178930	154011	678034	1.1527	0.0026465	0.0402681	0.174754	-2.5166	down
Lmtn002916	C22H20O14	Mearnsetin-3-O-glucuronide	Flavonoids	Flavones	-	3	3.53171e+07	3.79682e+07	5.08385e+07	101157	38699	47216.1	1.27073	0.0131956	0.0762966	0.00150714	-9.37397	down
Yazn005837	C16H26O7	Boschnaside	Terpenoids	Monoterpenoids	-	1	9.4148e+06	1.03218e+07	1.20367e+07	439925	523939	672314	1.27127	0.00551027	0.0545588	0.0514952	-4.27942	down
ZbWn005232	C10H20O6S	(4-(pent-4-en-1-yloxy)butoxy)methyl hydrogen sulfate	Others	Others	-	2	9	9	9	6.03866e+06	4.23432e+06	4.49677e+06	1.27635	0.0128185	0.074925	547028	19.0613	up
Jmgn004021	C21H22O11	6-C-Glucosyl-2-Hydroxynaringenin	Flavonoids	Flavanones	-	2	1.07383e+07	1.22782e+07	1.61158e+07	1.15017e+08	1.06399e+08	1.17486e+08	1.26771	0.000158133	0.0140313	8.66041	3.11444	up
Lmbn001718	C6H10O3	3-Methyl-2-oxopentanoic acid	Organic acids	Organic acids	24809-08-3	3	615839	731329	512092	99992.2	110256	116873	1.26572	0.0145951	0.0801606	0.175942	-2.50683	down
Zmxn002705	C8H8O3	2,5-Dihydroxyacetophenone*	Others	Ketone compounds	490-78-8	2	9	9	9	979248	1.09414e+06	750779	1.27632	0.0112965	0.0694963	104599	16.6745	up
Hmhp005846	C18H16O7	Tenaxin I*	Flavonoids	Flavones	86926-52-5	2	190989	115350	94596.3	6.37979e+07	7.37137e+07	7.88125e+07	1.27379	0.00372869	0.0470059	539.548	9.07561	up
Zmhn000892	C13H18O8	4-O-Glucosyl-3,4-dihydroxybenzyl alcohol	Phenolic acids	Phenolic acids	-	2	307386	852182	445844	4.07032e+06	3.62116e+06	5.92945e+06	1.22084	0.0248406	0.101751	8.48438	3.08481	up
pmp000010	C17H14O8	5,7,4',5'-Tetrahydro-3',6-dimethoxyflavone	Flavonoids	Flavones	-	3	10005	4655.96	7142.94	996292	1.05991e+06	1.34069e+06	1.27104	0.00871774	0.0630465	155.793	7.28349	up
Lmbn014696	C20H30O2	Pimaric acid*	Terpenoids	Ditepenoids	127-27-5	2	42099.9	17742.9	149843	6.91745e+07	5.00559e+07	4.73234e+07	1.25606	0.0150197	0.0806971	794.303	9.63355	up
pmb0885	C18H26O3	4-Oxo-9Z,11Z,13E,15E-Octadecatetraenoic Acid	Lipids	Free fatty acids	-	3	830968	816661	1.18771e+06	108823	176922	123384	1.25328	0.0193737	0.0894325	0.144297	-2.79289	down
Lacp005409	C17H14O5	MelimesSanol C	Lignans and Coumarins	Coumarins	-	1	1.9652e+07	1.97676e+07	1.39141e+07	117090	105240	104352	1.27478	0.0117478	0.070948	0.00612526	-7.35101	down
MWSmce686	C9H10O5	Danshensu; Salvianic Acid A	Phenolic acids	Phenolic acids	76822-21-4	2	9	9	9	7.41434e+06	8.28083e+06	8.05175e+06	1.27647	0.00107077	0.0289051	879515	19.7463	up
pmp000789	C19H18O8	Casticin (5,3'-Dihydroxy-3,6,7,4'-Tetramethoxyflavone)	Flavonoids	Flavones	479-91-4	3	3393.7	4456.13	10353.8	343980	398468	427613	1.25956	0.0038232	0.04742	64.2762	6.00621	up
HJN012	C20H26O7	4,7,9,9'-Tetrahydroxy-3,3'-dimethoxy-8-O-4'-neolignan	Phenolic acids	Phenolic acids	-	1	108499	52515.1	52772.2	383986	605346	580257	1.23124	0.0177437	0.0861781	7.34187	2.87615	up
mws0224	C5H11NO2S	DL-Methionine	Amino acids and derivatives	Amino acids and derivatives	59-51-8	3	9.34178e+06	9.63999e+06	1.14465e+07	847590	2.09333e+06	774434	1.22479	0.000762539	0.0262188	0.122102	-3.03384	down
Zmhn001358	C13H16O8	4-O-Glucosyl-4-hydroxybenzoic acid	Phenolic acids	Phenolic acids	-	1	1.73852e+07	2.37338e+07	2.463e+07	3.60303e+06	3.08855e+06	4.41188e+06	1.25944	0.0133881	0.0772161	0.168876	-2.56596	down
Ymjm000148	C14H20O7	Salidroside	Phenolic acids	Phenolic acids	10338-51-9	2	1.87744e+07	2.63793e+07	2.70752e+07	3.90158e+06	3.62211e+06	4.92248e+06	1.25935	0.0156973	0.0826798	0.172316	-2.53687	down
ML10172161	C3H4O4	Hydroxypyruvic acid	Organic acids	Organic acids	1113-60-6	3	3.15869e+07	3.75567e+07	3.29017e+07	3.09924e+06	5.88401e+06	3.53182e+06	1.2542	0.000839108	0.0276546	0.122642	-3.02747	down
Lmhn002629	C11H10O7	Benzoyltartaric acid	Phenolic acids	Phenolic acids	-	1	1.59043e+08	1.98042e+08	2.72953e+08	955307	629214	686750	1.27344	0.0245745	0.101058	0.00360497	-8.1158	down
Lamp007647	C15H12O4	2',4,4'-Trihydroxychalcone*	Flavonoids	Chalcones	-	1	4.08851e+07	4.09518e+07	19814161	1.83656e+06	1.35079e+06	1.67566e+06	1.25717	0.0443501	0.134097	0.0478403	-4.38563	down
WaYn002313	C16H22O10	Homosyringic Acid 4'-O-Glucoside	Phenolic acids	Phenolic acids	-	1	1.04962e+06	1.00103e+06	1.86175e+06	1.74208e+07	9.19274e+06	1.46671e+07	1.24229	0.0342013	0.117008	10.5512	3.39934	up
Wchn004015	C10H12O4	3-Hydroxy-1-(4'-hydroxy-3'-methoxyphenyl)-propan-1-one	Others	Others	-	1	357612	268276	537793	2.38671e+06	2.41193e+06	2.76971e+06	1.2467	0.00034859	0.0184297	6.50381	2.70128	up
mws2212	C9H8O4	Caffeic acid	Phenolic acids	Phenolic acids	331-39-5	1	41524.7	48491.8	22400.6	2.20587e+06	2.32126e+06	2.11675e+06	1.26862	0.000612916	0.0245002	59.1002	5.88509	up
Yalp008047	C19H30O2	Methyl 12-phenyldodecanoate	Lipids	Free fatty acids	38795-65-2	1	5.96366e+07	5.5217e+07	5.80488e+07	3.00246e+06	4.13597e+06	7.98958e+06	1.24501	1.48535e-05	0.00856674	0.0874945	-3.51466	down
pmn001367	C13H16O9	Protocatechuic acid-4-O-glucoside*	Phenolic acids	Phenolic acids	-	1	5.93477e+06	4.83359e+06	9.43131e+06	6.67782e+07	5.82469e+07	8.29407e+07	1.25353	0.010937	0.0683787	10.2955	3.36394	up
Lazn003953	C26H36O12	Erythro-Guaiacylglycerol-β-dihydroconiferyl Ether glucoside	Lignans and Coumarins	Lignans	-	1	152822	171868	299507	1.34226e+07	9.69177e+06	8.66237e+06	1.26645	0.0187607	0.088509	50.9081	5.66982	up
MWSslk055	C18H16O7	Nevadensin	Flavonoids	Flavones	10176-66-6	2	21741.2	18904.2	14932.9	1.75401e+07	2.14798e+07	2.29469e+07	1.27564	0.00606323	0.0557285	1114.95	10.1228	up
Lsjp211254	C30H46O	Lupa-1,20(29)-dien-3-one (Glochidone)	Terpenoids	Triterpene	-	1	3.17708e+07	3.24907e+07	3.6898e+07	719460	561117	676081	1.27535	0.00232336	0.0402681	0.0193423	-5.6921	down
pmp000169	C19H18O7	Andrographidine D aglycone	Flavonoids	Flavanones	-	3	39371.9	78061.6	43548.8	2.88488e+07	3.05459e+07	3.57863e+07	1.27325	0.00431629	0.0510651	591.251	9.20763	up
mws0093	C10H12O3	Coniferyl alcohol	Phenolic acids	Phenolic acids	458-35-5	3	100535	51252.8	95002	9	9	9	1.27499	0.0340853	0.117008	0.000109405	-13.158	down
Lmjp005224	C18H16O8	4',5,7-Trihydroxy-3',3,6-Trimethoxyflavone (Jaceidin)	Flavonoids	Flavones	10173-01-0	2	31675	13145.4	22365.5	3.05239e+06	2.90558e+06	2.84968e+06	1.27	0.000392052	0.018843	131.094	7.03446	up
Zmcp102605	C15H22O	Nootkatone	Terpenoids	Sesquiterpenoids	4674-50-4	1	410836	287254	318615	2.73755e+07	1.98768e+07	1.80679e+07	1.27294	0.0172021	0.0854364	64.247	6.00556	up
mws1292	C26H28O14	Isoschaftoside	Flavonoids	Flavones	52012-29-0	2	5.35361e+06	6.11813e+06	3.96351e+06	305123	708430	1206765	1.18354	0.0107187	0.0677478	0.143847	-2.79739	down
Zbqn004681	C13H14N2O3	N-acetyl-tryptophan	Amino acids and derivatives	Amino acids and derivatives	-	1	6.73478e+07	8.07331e+07	6.49996e+07	969705	1.98812e+06	4.41395e+06	1.2393	0.00377196	0.047293	0.0345962	-4.85324	down
pmb3023	C21H22O11	Eriodictyol-8-C-glucoside	Flavonoids	Flavanones	1023271-51-3	3	1.29951e+06	1.63918e+06	1.07404e+06	9	9	9	1.27618	0.0147462	0.0802107	6.7286e-06	-17.1813	down
Qmxp101522	C20H30O2	Hinokiol(ISO2)	Terpenoids	Ditepenoids	-	2	215731	166514	308566	59208.5	29125.1	30642.7	1.21367	0.0385411	0.123664	0.172227	-2.53762	down
HJAP140	C17H14O5	Puerol A	Phenolic acids	Phenolic acids	152784-32-2	1	2.11715e+07	2.18563e+07	1.58055e+07	75102.3	74020.5	136387	1.27208	0.00946636	0.0646719	0.00485286	-7.68695	down
Xmmn006031	C21H36O10	Borneol 7-O-[β-D-apiofuranosyl-(1→6)]-β-D-glucopyranoside	Terpenoids	Monoterpenoids	88700-35-0	2	754397	1.03342e+06	1.0875e+06	62029.5	37548.2	63342.2	1.2643	0.0123545	0.0734582	0.0566615	-4.14149	down
ZbLn005207	C12H22O9S	Sulfatricalysine C	Others	Saccharides	-	1	1.87949e+07	2.60471e+07	1.83132e+07	267145	276684	393626	1.2727	0.0142203	0.0793727	0.0148437	-6.07401	down
Zmhp004269	C19H18O8	Skullcapflavone II	Flavonoids	Flavones	55084-08-7	1	13126.1	19325.5	418318	2.03782e+07	2.21379e+07	2.57802e+07	1.20094	0.00467225	0.0520455	151.51	7.24327	up
mws0566	C7H8O2	4-Methylcatechol	Phenolic acids	Phenolic acids	452-86-8	3	5373.58	9566.57	12018.8	9	9	9	1.27379	0.043669	0.13326	0.00100152	-9.96359	down
MWSslk117	C9H6O3	7-Hydroxy-4-chromone	Others	Chromone	59887-89-7	1	1.32614e+06	1.52979e+06	864077	165287	92459.2	188465	1.2351	0.0288617	0.106285	0.119949	-3.05951	down
HJN098	C42H68O13	Azukisaponin I	Terpenoids	Triterpene Saponin	82793-02-0	2	7.15829e+06	5.01245e+06	6.38333e+06	376465	683464	1.32039e+06	1.20666	0.00577837	0.0546017	0.128291	-2.96251	down
MWSslk208	C20H30O2	Kaurenoic Acid*	Terpenoids	Ditepenoids	6730-83-2	2	68910.5	17433.5	152115	5.17405e+07	4.81502e+07	4.7619e+07	1.25445	0.000687613	0.0255858	618.595	9.27285	up
Lmxn007456	C18H16O8	Acerosin	Flavonoids	Flavones	15835-74-2	1	46214.8	62271.5	50920.3	1.55682e+07	1.30675e+07	1.75536e+07	1.27515	0.00707883	0.0594363	289.757	8.1787	up
Zmjp010694	C19H18O7	5-Hydroxy-3,7,3',4'-tetramethoxyflavone (Retusin)*	Flavonoids	Flavones	1245-15-4	2	19266.4	47756.6	22218.5	8.50772e+06	8.81921e+06	9.88242e+06	1.27014	0.00210375	0.0393992	304.896	8.25217	up
Lmyn006227	C15H10O5	Galangin (3,5,7-Trihydroxyflavone)	Flavonoids	Flavones	548-83-4	3	857972	733990	930413	32823.9	25900.1	37897.4	1.27262	0.00486606	0.0520455	0.0383057	-4.7063	down
Hmmp007513	C19H18O8	5,7-Dihydroxy-6,3',4',5'-tetramethoxyflavone (Arteanoflavone)*	Flavonoids	Flavones	68710-17-8	1	63991	64991.4	1.30815e+06	4.59124e+07	4.74502e+07	6.01725e+07	1.20111	0.00745908	0.0601897	106.835	6.73924	up
Lakn003294	C15H20O9	2-β-D-Glucopyranosyloxy-5-hydroxyphenylacetic acidmethylester	Phenolic acids	Phenolic acids	-	1	990574	802290	1.91786e+06	9.79596e+06	7.44022e+06	8.34052e+06	1.23	0.00266067	0.0402681	6.89265	2.78506	up
MWS20151	C15H10O5	Apigenin; 4',5,7-Trihydroxyflavone	Flavonoids	Flavones	520-36-5	1	335703	357207	387592	16294.9	25456	22365.9	1.27076	0.00148933	0.030954	0.0593398	-4.07486	down
Zmyn004943	C17H28O2	Norlinolenic acid	Lipids	Free fatty acids	-	3	350008	350464	305644	35939.4	65576.8	35964	1.25074	0.000211389	0.014603	0.136645	-2.8715	down
NK10256198	C15H10O6	3,5,7,2'-Tetrahydroxyflavone; Datiscetin	Flavonoids	Flavones	480-15-9	2	3.06236e+06	7.06846e+06	5.57586e+06	14751.9	20977.6	12868.4	1.27041	0.0466726	0.13699	0.00309409	-8.33627	down
pme0422	C10H10O4	Isoferulic Acid*	Phenolic acids	Phenolic acids	25522-33-2	2	2.21604e+07	1.77961e+07	3.01872e+07	788187	4201080	1.34327e+06	1.18844	0.0209735	0.0932951	0.0902796	-3.46946	down
Lssp210188	C20H24O7	(7'R)-7'-Hydroxylariciresinol	Others	Others	-	1	192245	150593	169943	762430	1.32557e+06	1.01668e+06	1.25274	0.0331246	0.114057	6.0546	2.59803	up
Zjhp090604	C16H14O5	5,7-dihydroxy-3-(4'-hydroxybenzyl)-chroman-4-one	Flavonoids	Other Flavonoids	-	1	31622.6	46061	60219.8	2.28685e+07	2.63371e+07	2.77836e+07	1.27368	0.00322438	0.0435009	558.284	9.12485	up
Qahn003953	C12H22O6	Erigeside B	Others	Others	95632-87-4	2	872158	1.06387e+06	543177	150790	108381	107523	1.23961	0.0425168	0.132014	0.147908	-2.75723	down
MWSHY0103	C25H22O10	Silibinin	Flavonoids	Flavanonols	22888-70-6	3	126930	169714	160559	36172.3	12464.6	31196.7	1.19549	0.00296938	0.0417705	0.174614	-2.51776	down
Lmdp005525	C17H14O5	Afrormosin (6,4'-Dimethoxy-7-Hydroxyisoflavone)	Flavonoids	Isoflavones	550-79-8	2	1.98467e+07	2.05305e+07	1.36794e+07	104198	74580.2	139614	1.2717	0.0144677	0.0796586	0.00588996	-7.40753	down
Wagp009413	C19H18O8	5,7-Dihydroxy-3,4',6,8-tetramethoxyflavone*	Flavonoids	Flavones	50461-86-4	1	69129.8	58851.3	1.31329e+06	4.5154e+07	5.03659e+07	5.69561e+07	1.20061	0.00410953	0.0496371	105.793	6.7251	up
MWSHY0189	C21H20O10	Apigenin-7-O-glucoside(Cosmosiin)	Flavonoids	Flavones	578-74-5	1	1.94567e+07	1.51061e+07	1.95165e+07	1.87587e+06	1.28564e+06	1.92152e+06	1.26577	0.00701682	0.0593274	0.0939924	-3.41131	down
Wbmp001002	C8H9NO2	4-methoxybenzamide	Alkaloids	Alkaloids	3424-93-9	2	1.55179e+07	9.10861e+06	1.98113e+07	558680	6.00115e+06	1.31869e+06	1.05601	0.0392831	0.125002	0.177293	-2.49579	down
Hmcn007243	C15H20O4	Artemisiifolin	Terpenoids	Sesquiterpenoids	26931-87-3	2	60141	60671.3	92816.9	1.05088e+06	1.01472e+06	845484	1.26702	0.00402246	0.0490996	13.6268	3.76838	up
MWS20190	C18H16O8	5,7,4'-trihydroxy-6,3',5'-trimethoxyisoflavone	Flavonoids	Isoflavones	-	1	106162	138145	97616.6	2.42788e+07	2.62263e+07	2.54288e+07	1.27551	0.000500084	0.0209762	222.079	7.79493	up
Qmqp102523	C15H20O3	Pechueloic acid	Terpenoids	Sesquiterpenoids	115473-63-7	3	210923	130942	218499	3.00108e+06	2.36609e+06	2.30294e+06	1.26429	0.00796326	0.0609322	13.6877	3.77481	up
MWSHC20189	C20H22O6	Epipinoresinol*	Lignans and Coumarins	Lignans	24404-50-0	3	727596	449259	732588	7.53783e+06	6.19245e+06	1.17411e+07	1.25296	0.0420259	0.13133	13.3397	3.73765	up
mws0097	C20H22O6	Pinoresinol*	Lignans and Coumarins	Lignans	487-36-5	3	751483	498434	650430	7.34381e+06	6.58712e+06	1.12879e+07	1.26059	0.0331157	0.114057	13.2706	3.73016	up
Lcsp001547	C15H25N3O6	Pro-Leu-Asp	Amino acids and derivatives	Amino acids and derivatives	-	1	1.39588e+06	940110	1.13223e+06	17927.8	227179	32689	1.14199	0.00574109	0.0546017	0.0800973	-3.6421	down
Lthp012104	C15H22O3	4β,14,11α,13-tetrahydroglucozaluzanin C	Terpenoids	Sesquiterpenoids	-	1	104725	49130.9	279262	722542	752274	762143	1.12514	0.0112444	0.0694963	5.16478	2.36871	up
Lasp008336	C26H22O8	Butesuperin A	Flavonoids	Isoflavones	-	1	916886	1.39692e+06	651909	35127.6	63515.3	39064.3	1.25438	0.0493375	0.141122	0.0464331	-4.4287	down
Lmjp005871	C18H16O7	Penduletin (5,4'-Dihydroxy-3,6,7-trimethoxyflavone)	Flavonoids	Flavones	569-80-2	3	76724.7	58817.9	47791.6	5.27433e+07	6.43041e+07	7.38307e+07	1.27514	0.00907455	0.0641339	1041.15	10.024	up
Zmzn003953	C18H30O4	13(s)-hydroperoxy-(9z,11e,15z)-octadecatrienoic acid	Lipids	Free fatty acids	67597-26-6	2	6.50068e+06	8.92611e+06	4.80302e+06	576792	988417	619776	1.24592	0.0360032	0.119682	0.108008	-3.21079	down
Zmtn001661	C14H20O8	Vanilloloside	Phenolic acids	Phenolic acids	74950-96-2	2	4.32861e+06	3.41657e+06	1.22336e+07	6.60458e+07	5.96402e+07	8.41175e+07	1.21317	0.00683304	0.0589333	10.5013	3.3925	up
mws0872	C11H15N5O4	1-Methyladenosine	Nucleotides and derivatives	Nucleotides and derivatives	15763-06-1	2	26986.4	35429.7	9384.02	196551	233230	213417	1.20601	0.000231981	0.0152908	8.95817	3.1632	up
pmp000344	C15H10O5	3',4',7-Trihydroxyflavone	Flavonoids	Flavones	2150-11-0	1	6.14925e+06	5.76612e+06	6.92485e+06	347564	359509	372521	1.27564	0.0032865	0.0438264	0.0573026	-4.12525	down
Lmhp005784	C24H28N2O5	p-Coumaroylferuloylcadaverine	Alkaloids	Phenolamine	-	3	1.02491e+06	1.63139e+06	2.13385e+06	81545.4	75852.6	80831.3	1.26402	0.0418564	0.13133	0.0497331	-4.32965	down
Hajp008429	C17H16O5	4',5-dihydroxy-7-methoxy-6-methylfavanone	Flavonoids	Flavones	-	1	72915.6	27004.4	71543.6	4.51268e+07	5.38658e+07	6.66959e+07	1.27016	0.0126446	0.0746062	966.319	9.91636	up
Wbwn006953	C20H18O5	Cagayanone A	Lignans and Coumarins	Lignans	-	1	783732	414180	538929	4.38462e+06	4.58604e+06	4.46164e+06	1.25737	5.7286e-05	0.0101661	7.73376	2.95117	up
mws0154	C7H10O5	Shikimic acid	Organic acids	Organic acids	138-59-0	3	132236	142102	151825	1.63078e+06	2.13228e+06	1.435e+06	1.27028	0.0165591	0.0849616	12.1974	3.6085	up
Wasn000495	C11H20O10	6-O-alpha-L-arabinopyranosyl-D-glucopyranose	Others	Saccharides	14116-69-9	2	2.34645e+06	1.63645e+06	2.5343e+06	1.59847e+07	1.17214e+07	1.39219e+07	1.25769	0.00838626	0.0620099	6.3874	2.67523	up
Zbqn004234	C12H13NO5	N-(malonyl)phenylalanine	Amino acids and derivatives	Amino acids and derivatives	-	1	970191	874914	753150	58162.2	139995	54327.8	1.23521	0.00211768	0.0393992	0.0971749	-3.36327	down
Zmhp004065	C18H16O7	7,8-Dihydroxy-5,6,4'-trimethoxyflavone*	Flavonoids	Flavones	-	2	175421	130372	67149.3	6.70296e+07	7.41375e+07	8.48272e+07	1.27174	0.00469533	0.0520455	605.977	9.24312	up
MWS5083	C17H21N4O9P	Flavin Single Nucleotide(FMN)	Nucleotides and derivatives	Nucleotides and derivatives	6184-17-4	3	119487	83645	98534.3	1.20077e+06	1.7275e+06	1.88333e+06	1.26667	0.018146	0.0868525	15.9501	3.99549	up
Lmsn003588	C17H14O5	Pterocarpine	Flavonoids	Isoflavones	524-97-0	3	2.07857e+07	2.02446e+07	1.65017e+07	148060	89892.6	176591	1.27174	0.00495491	0.0520455	0.00720546	-7.11669	down
Zmmp002946	C14H18N2O5	(3-(carboxyamino)-2-methylpropanoyl)phenylalanine	Amino acids and derivatives	Amino acids and derivatives	-	1	3.01127e+07	3.58297e+07	2.11292e+07	1.66111e+06	7.80414e+06	2.14901e+06	1.16342	0.015111	0.0806971	0.133387	-2.90631	down
HX1227	C15H22O	Selina-3,7(11)-dien-8-one	Terpenoids	Monoterpenoids	-	1	362442	292254	280586	2.52731e+07	1.93136e+07	1.66727e+07	1.27382	0.0156195	0.0824583	65.4983	6.03339	up
Wcdn001824	C13H16O9	2-Hydroxy-5-[3,4,5-Trihydroxy-6-(Hydroxymethyl)Oxan-2-Yl]Oxybenzoic Acid	Others	Others	-	3	4.74225e+06	4.40783e+06	1.24974e+07	5.98017e+07	5.56261e+07	7.74451e+07	1.21941	0.00676667	0.0589333	8.90972	3.15538	up
pmc1990	C17H16O5	4'-Hydroxy-5,7-dimethoxyflavanone	Flavonoids	Flavanones	-	3	28002	46814.7	80130.7	7.55517e+07	8.02178e+07	1.05229e+08	1.2713	0.0110438	0.0684892	1684.44	10.718	up
Zbdp007428	C17H12O6	3-Methoxy-7-hydroxy-3',4'-methylenedioxyflavone	Flavonoids	Other Flavonoids	-	2	977921	1.07986e+06	897936	18340	8709.8	15150.2	1.26922	0.00285821	0.0409942	0.0142774	-6.13012	down
pme0026	C6H14N2O2	L-Lysine	Amino acids and derivatives	Amino acids and derivatives	56-87-1	1	356404	244492	282616	36096.8	65308.9	11633.5	1.1594	0.00687375	0.0589507	0.127943	-2.96643	down
Wcfp004977	C14H14N2O5	Malonyltryptophan	Organic acids	Organic acids	-	1	4.74869e+06	8.54259e+06	5.92647e+06	157247	169235	849195	1.19756	0.0289015	0.106285	0.0611766	-4.03088	down
Qmjp080402	C18H28O2	(11E)-(4S,5R,9S,10S)-15,16-Bisnor-13-oxo-8(17),11-labdadien-19-ol	Terpenoids	Sesquiterpenoids	-	3	4.22606e+06	3.00053e+06	5.00131e+06	423670	983054	895389	1.20295	0.0222157	0.0963333	0.188267	-2.40915	down
Lmdn011166	C20H26O3	3,4,4'-Trihydroxy-5,5'-diisopropyl-2,2'-dimethylbiphenyl	Others	Others	123132-69-4	1	3.10587e+06	2.22829e+06	4.69804e+06	138598	984684	267485	1.12209	0.0445442	0.134331	0.13863	-2.85069	down
MWSmce371	C15H20O3	Atractylenolide Ⅲ	Terpenoids	Sesquiterpenoids	73030-71-4	3	29739	17838.3	29861.6	347876	413052	277674	1.26122	0.0138407	0.0788406	13.4119	3.74544	up
Lhmp122202	C16H12O5	stevenin	Lignans and Coumarins	Coumarins	36286-69-8	2	1.40301e+07	1.38996e+07	9.57953e+06	162289	99411.4	121367	1.27181	0.0136646	0.0782239	0.0102127	-6.6135	down
Zmdn001564	C14H18N2O5	γ-Glutamylphenylalanine	Amino acids and derivatives	Amino acids and derivatives	7432-24-8	1	3.60536e+06	4.03525e+06	2.46114e+06	239949	691071	207009	1.20308	0.0161168	0.0840168	0.112657	-3.14999	down
ZbWn003804	C12H26O6S	8-(methoxymethoxy)decyl hydrogen sulfate	Others	Others	-	2	1.15073e+07	1.50226e+07	1.05516e+07	780052	1.047e+06	985592	1.2692	0.0136253	0.078193	0.0758505	-3.7207	down
Smbp005175	C18H16O7	Rivularin*	Flavonoids	Flavones	70028-59-0	2	75340.6	38556.8	106782	3.44359e+07	3.81268e+07	4.86077e+07	1.27005	0.0109024	0.0683471	549.078	9.10087	up
Lmmp005689	C16H12O6	Cajanin	Flavonoids	Isoflavones	32884-36-9	1	429655	367596	481997	35375.9	27480.7	31259.2	1.27226	0.00672661	0.0589333	0.0735712	-3.76472	down
Lmmn004491	C48H76O21	Medicagenic acid-3-O-glucosyl-(1,6)-glucosyl-(1,3)-glucoside	Terpenoids	Triterpene Saponin	37838-43-0	2	2.85143e+07	2.7164e+07	3.05154e+07	612825	867030	804694	1.27431	0.00113831	0.0295065	0.0265048	-5.2376	down
Zjxp110310	C15H24O3	5-Hydroxy-12-oxofarnesol	Terpenoids	Sesquiterpenoids	-	3	88323.2	106710	53106.2	395759	383208	539849	1.23059	0.0130312	0.0756622	5.31482	2.41002	up
pme0170	C8H16N4O3	N-Acetyl-L-Arginine	Amino acids and derivatives	Amino acids and derivatives	155-84-0	2	7.00577e+06	5.48681e+06	6.5919e+06	668695	2.12928e+06	717452	1.17823	0.00142706	0.030204	0.184203	-2.44063	down
Zbsp005869	C18H16O7	7,4'-Dihydroxy-3,5,3'-trimethoxyflavone*	Flavonoids	Flavones	-	1	17354.6	47862.6	47560.3	1.18814e+07	1.47435e+07	1.70636e+07	1.26715	0.0104762	0.0665801	387.387	8.59763	up
Lmmp004600	C40H40O23	Tricin-7-O-[(2''-Sinapoyl)glucuronyl](2→1)glucuronide	Flavonoids	Flavones	-	2	2.6094e+07	3.57824e+07	5.51984e+07	113775	35300.1	30010	1.2637	0.0449928	0.135154	0.00152966	-9.35257	down
Qmxp101615	C22H36O3	Ent-3β-Acetoxyisopimar-15-8β-ol	Terpenoids	Ditepenoids	-	1	5.76207e+07	7.20957e+07	3.27915e+07	3.39011e+06	2.68102e+06	4.2376e+06	1.25195	0.0473557	0.138211	0.0634353	-3.97857	down
pmn001553	C14H20O8	Cimidahurinine	Phenolic acids	Phenolic acids	142542-89-0	2	5.20602e+06	5.73258e+06	7.06038e+06	571189	578766	675643	1.27176	0.0101	0.0660074	0.101428	-3.30147	down
Wbmp010456	C18H28O2	Macrophypene B	Terpenoids	Ditepenoids	-	1	958572	816479	1.33999e+06	109069	247129	216314	1.21046	0.0258478	0.102458	0.183789	-2.44388	down
Lakn005184	C24H34O12	1'S,4'S-4'-Dihydroabscisic acid-4′-O-β-malonylglucopyranoside	Terpenoids	Sesquiterpenoids	-	1	4.48007e+06	5.27095e+06	4.54366e+06	23436.2	71005.6	65020	1.2616	0.00280652	0.0409788	0.0111553	-6.48612	down
Wagp008723	C18H16O7	Mikanin	Flavonoids	Flavones	4324-53-2	1	59692.5	30265.9	22639.2	3.68454e+06	3.96898e+06	4.64224e+06	1.26744	0.0047996	0.0520455	109.201	6.77084	up
Hmtn001120	C14H20O8	5-(2-Hydroxyethyl)-2-O-glucosylphenol	Phenolic acids	Phenolic acids	-	3	4.88679e+06	5.98775e+06	7.51001e+06	606446	619224	696221	1.26863	0.0185581	0.0879129	0.104538	-3.2579	down
MWSslk080	C10H20O3	10-Hydroxydecanoic acid	Lipids	Free fatty acids	1679-53-4	2	34480.7	25941.5	21323.9	697496	884019	640779	1.27047	0.0102799	0.0664307	27.1853	4.76476	up
Zmyn006432	C53H84O24	Polygalasaponin Xxviii	Terpenoids	Triterpene	176182-01-7	3	9.99262e+06	7.86895e+06	4.57453e+06	57315.2	123164	210259	1.24823	0.0429596	0.132497	0.0174156	-5.84348	down
Lajp006981	C17H12O7	5,6-Dihydroxy-7-methoxy-3′,4′-dioxymethylene-flavonoid	Flavonoids	Flavones	-	2	339245	259870	328355	24976.8	16787.8	9144.59	1.24987	0.00580487	0.0546017	0.0548903	-4.1873	down
MWS5209	C5H11NO2	N-Methyl-α-aminoisobutyric acid	Amino acids and derivatives	Amino acids and derivatives	2566-34-9	3	8.10969e+06	3.8995e+06	9.8812e+06	1.00071e+08	1.19382e+08	1.2584e+08	1.25	0.00359211	0.0461302	15.7737	3.97945	up
Lxmp122302	C19H32O7	Dehydroxyampelopsisionoside	Terpenoids	Sesquiterpenoids	-	3	121447	196810	125486	782563	894387	946563	1.25499	0.000959817	0.0289051	5.91224	2.5637	up
Lmqp003432	C13H22O3	6,9-Dihydroxy-7-megastigmen-3-one	Terpenoids	Sesquiterpenoids	-	2	271930	373351	447721	5.02315e+06	5.59862e+06	7.83812e+06	1.26322	0.0209884	0.0932951	16.8892	4.07803	up
Zmgp006231	C16H10O5	pseudobaptigenin	Flavonoids	Isoflavones	90-29-9	1	1.29167e+07	1.37428e+07	5.95647e+06	123370	138363	134982	1.26616	0.04901	0.141122	0.0121632	-6.36133	down
Zbdp006427	C16H12O5	7,8-Dihydroxy-4'-methoxyisoflavone	Flavonoids	Other Flavonoids	-	1	4.94322e+06	3.78077e+06	2.75664e+06	571178	228520	289025	1.23179	0.0288514	0.106285	0.0948314	-3.39849	down
Wasn000977	C11H20O10	4-O-galactopyranosylxylose	Others	Saccharides	14087-31-1	2	442738	369596	432835	2.49438e+06	2.81663e+06	2.46708e+06	1.27284	0.0018891	0.0372492	6.24662	2.64307	up
MWS0631	C3H7NO5S2	S-Sulfo-L-Cysteine	Amino acids and derivatives	Amino acids and derivatives	1637-71-4	3	101288	83943.8	143182	13551.7	12888	12072.1	1.26254	0.0314852	0.111551	0.117266	-3.09214	down
Lmmn005168	C20H32O4	Siegesbeckic acid	Terpenoids	Ditepenoids	-	2	5398.05	6574.83	3843.22	4.19044e+06	4.19564e+06	4.9229e+06	1.27504	0.00300083	0.0418656	841.482	9.71679	up
Hamp007385	C17H16O5	5-hydroxy-7,8-dimethoxyflavanone	Others	Others	-	2	106422	66086.8	116930	4.32359e+07	4.9984e+07	6.34694e+07	1.27356	0.0127672	0.074925	541.355	9.08043	up
pmp000006	C18H16O7	Eupatilin (5,7-Dihydroxy-3',4',6-Trimethoxyflavone)*	Flavonoids	Flavones	22368-21-4	2	54097.7	46828.6	32780	3.34662e+07	3.90546e+07	4.5926e+07	1.27495	0.00824411	0.0615441	885.874	9.79096	up
MWSmce085	C16H10O7	Wedelolactone	Lignans and Coumarins	Coumarins	524-12-9	3	2.54095e+06	1.98838e+06	1.82211e+06	9	9	9	1.27623	0.0103683	0.0664674	4.25101e-06	-17.8438	down
Lthp012013	C15H18O2	Dehydrocostuslactone	Terpenoids	Sesquiterpenoids	477-43-0	2	294778	511918	113712	2.00562e+06	2.08108e+06	2.32213e+06	1.1787	0.000310753	0.0184297	6.96304	2.79972	up
pme1975	C3H4O4	Malonic acid	Organic acids	Organic acids	141-82-2	3	6.82534e+07	7.03599e+07	7.06283e+07	1.04442e+07	1.52754e+07	1.08629e+07	1.26452	7.70619e-05	0.0111114	0.174834	-2.51594	down
Lmqn008288	C18H36O3	3-Hydroxyoctadecanoic Acid	Lipids	Free fatty acids	45261-96-9	3	9	9	9	690796	410889	390139	1.27587	0.0359703	0.119682	55252.7	15.7538	up
Lmbp000668	C6H5NO2	Isonicotinic acid	Others	Vitamin	55-22-1	2	1.24052e+07	1.13767e+07	8.86933e+06	5.19768e+07	6.10973e+07	8.04508e+07	1.25567	0.0222304	0.0963333	5.92703	2.56731	up
Lmsp008681	C18H18O6	5-Hydroxy-7,8,4'-Trimethoxyflavanone	Flavonoids	Flavanones	-	3	38811.9	31610.2	70020	437108	249331	334113	1.22662	0.0279931	0.105696	7.26671	2.8613	up
mws0567	C5H11N3O2	4-Guanidinobutyric acid	Organic acids	Organic acids	463-00-3	3	94494.1	112334	78147.9	414959	609263	745709	1.24563	0.0344094	0.11743	6.2108	2.63478	up
Wbmn010483	C30H46O5	Cannabifolin D	Terpenoids	Triterpene	-	1	943293	256787	298806	3.39619e+07	2.80056e+07	2.73166e+07	1.25388	0.00477783	0.0520455	59.5669	5.89644	up
Hmgn004693	C20H20O7	8-Hydroxy-α-conidendrin	Lignans and Coumarins	Lignans	-	3	510171	355415	297244	68160.5	49726.9	75355.5	1.2441	0.03493	0.118321	0.166183	-2.58915	down
Lmfp009701	C21H36O4	Glycerol 9(E),11(Z),13(E)-octadecatrienoyl ester*	Lipids	Glycerol ester	-	1	4.4515e+07	4.30552e+07	2.41501e+07	2.50324e+06	4.35092e+06	5.4675e+06	1.23057	0.0350809	0.118321	0.11029	-3.18062	down
Lmyp003387	C10H9NO3	2-Oxo-3,4-dihydro-1H-quinoline-3-carboxylic acid	Alkaloids	Quinoline alkaloids	246867-17-4	3	3.90794e+06	4.8148e+06	5034125	646994	1.34243e+06	473860	1.20421	0.00129699	0.0297725	0.179058	-2.4815	down
MWSHY0146	C16H12O5	Glycitein	Flavonoids	Isoflavones	40957-83-3	2	2.14124e+06	1.66119e+06	1.13212e+06	115375	125619	183349	1.25331	0.0349835	0.118321	0.0859945	-3.53961	down
Lmhp011562	C21H36O4	1-α-Linolenoyl-glycerol*	Lipids	Glycerol ester	-	1	4.22261e+07	3.90892e+07	2.54246e+07	2.40791e+06	4.37138e+06	5.82172e+06	1.22943	0.0226837	0.0973913	0.118053	-3.08249	down
Wcdp005073	C18H39NO3	4-Hydroxysphinganine; Phytosphingosine	Lipids	Sphingolipids	554-62-1	2	655386	500764	2.01385e+06	1.48397e+07	1.56529e+07	9.22832e+06	1.2078	0.0215643	0.0956056	12.5303	3.64735	up
Wbmp003697	C13H20O2	(R)-3-(3'-Hydroxybutyl)-2,4,4-trimethylcyclohexa-2,5-dienone	Terpenoids	Sesquiterpenoids	-	1	7.55461e+06	7.28651e+06	7.27332e+06	9	9	9	1.27648	0.000154527	0.0140313	1.22092e-06	-19.6436	down
pmf0443	C15H20O3	Parthenolide	Terpenoids	Sesquiterpenoids	20554-84-1	3	60700.6	63986.9	35418.2	9	9	9	1.27509	0.0274361	0.105331	0.000168639	-12.5338	down
HJAP057	C17H14O6	Dihydroxy-dimethoxyflavone*	Flavonoids	Flavones	-	2	386762	193610	218433	3.60877e+06	4.15395e+06	4.43153e+06	1.26104	0.00256168	0.0402681	15.2656	3.93221	up
Zmdp002216	C11H20N2O5	L-γ-Glutamyl-L-leucine	Amino acids and derivatives	Amino acids and derivatives	2566-39-4	1	2.32456e+07	2.65744e+07	2.00563e+07	1.14559e+06	6.26003e+06	1.41341e+06	1.16089	0.00134215	0.0297725	0.126209	-2.98611	down
Ybmn004904	C7H6O3	p-hydroxy-benzoic acid	Phenolic acids	Phenolic acids	-	1	3.09571e+06	3.4605e+06	3.34151e+06	192847	386255	328622	1.25787	0.000129875	0.0130271	0.0917104	-3.44677	down
pme0534	C6H12O7	Gluconic acid	Others	Saccharides	526-95-4	1	1.04408e+07	8.32584e+06	1.02405e+07	4.40434e+07	9.16034e+07	7.1619e+07	1.24223	0.0495382	0.141209	7.14533	2.837	up
Zmzp000145	C9H20N2O2	Trimethyllysine	Amino acids and derivatives	Amino acids and derivatives	23284-33-5	2	12489341	2.1118e+07	1.55645e+07	804100	2.27282e+06	898718	1.22996	0.023727	0.0993653	0.0808519	-3.62857	down
Hmcp004865	C15H20O2	Costunolide*	Terpenoids	Sesquiterpenoids	553-21-9	1	24066.4	131463	197271	2.95831e+06	3.78347e+06	2.70675e+06	1.19819	0.00995081	0.0659894	26.7815	4.74317	up
pmp000567	C17H16O5	Melilotocarpan A	Phenolic acids	Phenolic acids	61135-95-3	2	1.276e+07	1.22427e+07	8.22865e+06	350565	240288	288581	1.26999	0.0171418	0.0854364	0.026464	-5.23982	down
Jmcn005419	C21H36O7	pterodontoside G	Terpenoids	Sesquiterpenoids	-	3	9	9	9	186704	241005	125309	1.27567	0.0313339	0.111551	20482.2	14.3221	up
Lmhn004030	C15H14O6	5,7,3',4',5'-Pentahydroxyflavan (Tricetiflavan)	Flavonoids	Flavanols	-	3	169233	240216	341870	9	9	9	1.27572	0.037766	0.122761	3.59368e-05	-14.7642	down
Zmgn001039	C9H17NO6S	S-Ribosyl-L-homocysteine	Amino acids and derivatives	Amino acids and derivatives	-	3	393584	342890	56205.1	1.93403e+06	2.24936e+06	2.19235e+06	1.13072	0.000208789	0.014603	8.04327	3.00778	up
Lamp004464	C23H24O11	Odoratin 7-Glucoside	Flavonoids	Isoflavones	-	2	9598115	5.14742e+06	8.88852e+06	315536	382185	236561	1.26198	0.0316142	0.111551	0.0395312	-4.66087	down
pme2529	C6H12O5	1,5-Anhydro-D-glucitol	Others	Saccharides	154-58-5	3	2.73764e+06	3.15659e+06	2.47795e+06	473326	861865	291442	1.1957	0.00109392	0.0289051	0.19429	-2.36372	down
Wbmn003411	C20H18O7	9-hydroxysesamin(ISO-2)	Lignans and Coumarins	Lignans	-	2	179202	203769	171259	1.56868e+06	1.03252e+06	1.00892e+06	1.26003	0.030416	0.109298	6.51375	2.70349	up
pmp000009	C18H16O8	Centaureidin (5,7,3'-Trihydroxy-3,6,4'-Trimethoxyflavone)	Flavonoids	Flavones	17313-52-9	3	9955.73	17975.9	30431.2	450882	585360	531398	1.25152	0.00513223	0.0528062	26.8603	4.7474	up
pmb0962	C10H22N2O4	L-Lysine-Butanoic Acid	Amino acids and derivatives	Amino acids and derivatives	80407-71-2	3	9.48598e+06	4.91863e+06	1.07533e+07	1.11239e+08	1.47674e+08	1.47167e+08	1.25523	0.0078579	0.060886	16.1413	4.01268	up
Lskp211385	C20H20O6	(-)-dihydrosesamin	Lignans and Coumarins	Lignans	-	3	812983	568242	632416	3.30422e+06	3.46982e+06	3.38666e+06	1.26619	2.44967e-05	0.0101661	5.04594	2.33512	up
Wagp009074	C18H16O7	Santin	Flavonoids	Flavones	27782-63-4	1	14623.1	21721.2	9678.84	1.81937e+07	2.2369e+07	2.58374e+07	1.27346	0.00983374	0.065921	1442.75	10.4946	up
mws0988	C16H12O7	Rhamnetin; 3,5,3',4'-Tetrahydroxy-7-Methoxyflavone	Flavonoids	Flavonols	90-19-7	3	13336.7	5060.41	24514.4	159831	169076	221857	1.20617	0.00847908	0.0622715	12.8349	3.682	up
MWS5185	C8H8O3	2',4'-Dihydroxyacetophenone*	Others	Ketone compounds	89-84-9	2	7281.06	9385.24	13310.4	988684	1.21663e+06	683012	1.26912	0.0253152	0.101751	96.3523	6.59025	up
pme0021	C9H11NO2	L-Phenylalanine	Amino acids and derivatives	Amino acids and derivatives	63-91-2	1	2.81475e+06	3.29325e+06	4.17364e+06	578205	832933	205243	1.16897	0.00871002	0.0630465	0.157211	-2.66923	down
MWSmce548	C5H11NO2	Betaine	Alkaloids	Alkaloids	107-43-7	3	2.39039e+06	1.69753e+06	2.34249e+06	1.03398e+07	1.26157e+07	1.2103e+07	1.26269	0.00262455	0.0402681	5.45199	2.44678	up
Jmbp005389	C18H16O8	Thymonin (5,6,4'-Trihydroxy-7,8,3'-trimethoxyflavone)	Flavonoids	Flavones	76844-67-2	1	80840.3	60043	63967.5	3.75635e+07	4.07623e+07	4.30735e+07	1.27598	0.00155976	0.0318439	592.623	9.21097	up
mws1198	C10H12O3	Methyl 3-(4-hydroxyphenyl)propionate	Phenolic acids	Phenolic acids	5597-50-2	3	4958.99	2632.97	3291.95	22308.4	23091.4	21953.7	1.25253	0.00019135	0.014603	6.18835	2.62956	up
pmb2795	C10H10O3	4-Methoxycinnamic acid	Phenolic acids	Phenolic acids	830-09-1	3	587593	583158	364279	15919.2	43542.5	38587.2	1.23788	0.0216841	0.0956056	0.0638743	-3.96862	down
MWSHY0176	C17H16O5	Farrerol (6,8-Dimethyl-5,7,4'-trihydroxyflavanone)	Flavonoids	Flavanones	24211-30-1	1	68418.9	31112.4	134301	4.6127e+07	5.41471e+07	6.90719e+07	1.26544	0.0139254	0.0791278	724.22	9.50028	up
pmb2673	C9H9NO5	6-Hydroxydopaquinone	Amino acids and derivatives	Amino acids and derivatives	135791-48-9	3	47737.1	54301.1	59933.1	1880.51	10879	6559.41	1.1663	0.000630666	0.0245002	0.119274	-3.06765	down
Zmmp001429	C8H16N2O3	Glycyl-L-leucine	Amino acids and derivatives	Amino acids and derivatives	-	1	888927	976901	1.23874e+06	42811.2	166739	22244.7	1.18101	0.00515015	0.0528062	0.0746627	-3.74347	down
Labn004481	C19H24O13	Gentisic acid-[6''-(3-hydroxy-3-methylglutaryl)]-glucoside	Phenolic acids	Phenolic acids	-	2	4.80881e+06	2.93151e+06	2.28684e+06	20815.9	30010	40638.1	1.26645	0.048405	0.140466	0.00912162	-6.77649	down
Lmjp101403	C10H10O4	3ξ-(1ξ-Hydroxyethyl)-7-hydroxy-1-isobenzofuranone	Others	Others	-	3	1.43934e+06	1.16982e+06	2.24082e+06	198123	124734	225185	1.24163	0.0457127	0.136757	0.112999	-3.14562	down
Lmjp004160	C17H14O8	3,7-DimethylQuercetagetin-(3',4',5,6-Tetrahydroxy-3,7-dimethoxyflavone)	Flavonoids	Flavones	59171-23-2	2	21805.8	5202.64	7745.87	2.33026e+06	1.81543e+06	2.21566e+06	1.26102	0.00539088	0.0544295	183.038	7.516	up
Wasn006585	C21H36O10	Geranyl 3-O-xylopyranosyl-glucopyranoside	Others	Others	-	2	752461	1.0606e+06	1.06546e+06	61328	54787.8	39847.3	1.26772	0.0125203	0.0741249	0.0541818	-4.20605	down
Lmjp009373	C15H16O	Pyrocurzerenone	Terpenoids	Sesquiterpenoids	20013-75-6	2	8183.45	7733.8	11600.7	634592	495109	545615	1.2731	0.00543176	0.0544829	60.8809	5.92792	up
Qmqp101735	C19H30O3	3β,6β-Dihydroxy-15-nor-14-oxo8(17),12-labdadien-14-a	Terpenoids	Sesquiterpenoids	-	3	1.61302e+07	1.43054e+07	1.81932e+07	452786	1.8056e+06	825396	1.22977	0.00242158	0.0402681	0.0634148	-3.97904	down
Hmqp006221	C19H34O3	13-Hydroxy-9Z,11E-octadecadienoic acid	Lipids	Free fatty acids	18104-45-5	2	12492.6	16920.8	16271	9	9	9	1.27621	0.00812865	0.0612837	0.000591011	-10.7245	down
pmp000583	C22H20O12	Diosmetin-7-O-glucuronide	Flavonoids	Flavones	35110-20-4	1	1.12872e+07	8.32329e+06	8.17833e+06	21508.2	27809.7	35438.4	1.27407	0.011819	0.0711916	0.00305002	-8.35697	down
Hmxp007521	C17H14O6	3',4'-Dihydroxy-7,5'-dimethoxyflavone	Flavonoids	Flavones	-	2	173272	139932	135696	1.61526e+06	1.9595e+06	2.09853e+06	1.27188	0.00644639	0.0582492	12.6382	3.65972	up
Lmhn001386	C12H12O9	Vnilloyltartaric acid	Phenolic acids	Phenolic acids	-	3	4.57714e+06	3.1563e+06	2.77364e+06	94256.9	1.10488e+06	515449	1.05891	0.0173645	0.0854364	0.163184	-2.61543	down
Zmgp007333	C17H14O4	7,4'-Di-O-methyldaidzein	Flavonoids	Isoflavones	1157-39-7	1	1.36119e+06	1.26293e+06	747810	42320.7	7989.62	25945	1.2328	0.0284141	0.10607	0.0226148	-5.46659	down
Lssp210422	C15H10O5	Genistein	Flavonoids	Isoflavones	446-72-0	1	412055	337928	439556	23097.1	10725.4	16268.3	1.2629	0.00577899	0.0546017	0.0421095	-4.56971	down
Jmcn007352	C15H22O3	5α-Hydroxycostic acid	Terpenoids	Sesquiterpenoids	-	3	400880	288524	291560	2.49877e+06	5.02846e+06	3.36987e+06	1.25374	0.0465565	0.13699	11.1086	3.4736	up
Lmzn006582	C30H46O4	2-Formyl-3-hydroxy-A(1)-norlup-20(29)-en-28-oic acid (Colubrinic acid)	Terpenoids	Triterpene	-	3	738520	2.9574e+06	2.00053e+06	6.04382e+07	4.95857e+07	4.52624e+07	1.239	0.00717244	0.0594363	27.2602	4.76872	up
pmp001287	C8H9N	N-Benzylmethylene isomethylamine	Alkaloids	Alkaloids	-	3	6.91502e+06	7.27823e+06	9.7123e+06	1.37209e+06	2.1857e+06	668837	1.1874	0.00729106	0.0594363	0.176805	-2.49976	down
Hmtp000776	C8H9NO3	4,5,6-Trihydroxy-2-cyclohexen-1-ylideneacetonitrile	Alkaloids	Alkaloids	-	3	2.13403e+06	2.31935e+06	2.73948e+06	413015	621050	161752	1.17619	0.0012347	0.0297725	0.166251	-2.58857	down
mws0920	C15H10O7	Tricetin (5,7,3',4',5'-Pentahydroxyflavone)	Flavonoids	Flavones	520-31-0	2	385851	226241	328412	14214.3	39413	21320.7	1.23554	0.0228455	0.0974206	0.0796891	-3.64947	down
MWSmce082	C11H10O4	Scoparone	Lignans and Coumarins	Coumarins	120-08-1	2	212296	422295	732015	2.64675e+06	3.02455e+06	2.59197e+06	1.1926	0.000368762	0.0184297	6.04657	2.59612	up
Lamp007741	C26H22O9	Methoxy astrernestin	Others	Lactones	-	2	543419	407031	339673	14214.3	9000.29	5686.84	1.26057	0.0195767	0.0894325	0.022402	-5.48023	down
MWS1837	C8H15NO2	Tranexamic Acid	Organic acids	Organic acids	1197-18-8	3	1.18147e+07	1.98097e+07	1.12582e+07	540079	310145	368124	1.2645	0.0372878	0.122018	0.0284112	-5.13739	down
Lmsp010763	C21H36O4	Monolinolenin*	Lipids	Glycerol ester	75685-85-7	1	4.46226e+07	4.57139e+07	2.60339e+07	2.55662e+06	4.34025e+06	5.29536e+06	1.23803	0.030529	0.109534	0.104771	-3.25469	down
pme1373	C9H14N3O7P	2'-Deoxycytidine-5'-monophosphate	Nucleotides and derivatives	Nucleotides and derivatives	1032-65-1	3	9174.98	10005	14159	1523.95	2128.1	2085.5	1.25394	0.0254114	0.101751	0.172097	-2.5387	down
Wcgp010223	C18H28O2	3-(Cyclohexen-1-yl)-2-hydroxy-4a,5-dimethyl-2,3,4,5,6,7,8,8a-octahydronaphthalen-1-one	Others	Others	-	3	935985	911109	1.19174e+06	84642	228206	191561	1.20994	0.00401952	0.0490996	0.165987	-2.59085	down
pma0461	C18H28O2	14,15-Dehydrocrepenynic acid	Lipids	Free fatty acids	4154-44-3	3	1.01663e+06	839498	1.33776e+06	90794.1	226358	217241	1.20446	0.0190399	0.0889173	0.167317	-2.57934	down
Lmhn003240	C11H10O6	Benzoylmalic acid	Phenolic acids	Phenolic acids	22138-51-8	1	1.16861e+08	1.28498e+08	1.87577e+08	1.22793e+06	1.48034e+06	2.4688e+06	1.26896	0.0227428	0.0973913	0.0119581	-6.38587	down
Wmbn000550	C22H32O5	Ajugarin V	Terpenoids	Ditepenoids	82231-14-9	3	184659	252978	148187	17907	28072.5	18895.5	1.25344	0.0287422	0.106285	0.110741	-3.17473	down
Smsp110188	C15H22O2	isopolygodial	Terpenoids	Sesquiterpenoids	-	3	9	9	9	171550	285467	246397	1.27587	0.0197199	0.0895789	26052.4	14.6691	up
Lmgn002679	C6H6O	Phenol	Phenolic acids	Phenolic acids	108-95-2	3	1.70169e+06	1.82945e+06	1.8434e+06	121804	199698	155646	1.26781	7.52552e-05	0.0111114	0.0887793	-3.49363	down
Lmdp006479	C17H14O7	5,6,4'-Trihydroxy-7,3'-dimethoxyflavone	Flavonoids	Flavones	-	1	3.49108e+06	4.91476e+06	4.19364e+06	4.4894e+07	5.48344e+07	5.29994e+07	1.27058	0.00372443	0.0470059	12.1218	3.59953	up
Lamp006511	C17H16O6	Indigocarpan	Flavonoids	Other Flavonoids	-	2	1.27928e+06	1.05265e+06	1.06402e+06	20731.8	24162.7	16675	1.27371	0.0043434	0.0511236	0.0181302	-5.78546	down
Lmjp005016	C17H14O7	Cirsiliol (3',4',5-Trihydroxy-6,7-Dimethoxyflavone)	Flavonoids	Flavanones	34334-69-5	3	3.76635e+06	5.67206e+06	4.32343e+06	4.69184e+07	5.52687e+07	4.98628e+07	1.26894	0.00183372	0.0367859	11.0487	3.4658	up
Zmbn005559	C16H18N2O5S	Indole-3-cyano-2-O-glucoside	Alkaloids	Plumerane	-	3	32191.3	45062.1	69576.8	1.80773e+06	2.16841e+06	2.18894e+06	1.26627	0.00356918	0.0461302	41.9878	5.3919	up
mws0089	C21H20O11	Kaempferol-7-O-glucoside*	Flavonoids	Flavonols	16290-07-6	2	1.59152e+06	2.92943e+06	1.81556e+06	168183	133400	243545	1.25037	0.0422334	0.131666	0.0860298	-3.53902	down
pme1299	C8H8O5	DL-3,4-Dihydroxymandelic acid	Organic acids	Organic acids	775-01-9	3	55424.1	48182.3	80407.1	1.12566e+06	996483	1.26128e+06	1.26777	0.0045565	0.0517825	18.3868	4.2006	up
Lmgn000160	C4H8N2O3	3-Ureidopropionic Acid	Organic acids	Organic acids	462-88-4	3	1.09809e+06	1.08566e+06	1.30713e+06	138986	181011	52273	1.21342	0.000974341	0.0289051	0.106641	-3.22917	down
Zmmp002106	C3H9N3O2	4-methyl-1,5,2,3-dioxadiazinan-2-amine	Nucleotides and derivatives	Nucleotides and derivatives	-	2	806862	806675	1.06011e+06	157739	265091	75854.4	1.17745	0.0034744	0.0455423	0.186518	-2.42261	down
MWSmce566	C17H16O5	Astrapterocarpan	Flavonoids	Other Flavonoids	73340-41-7	3	1.95555e+07	1.16493e+07	2.29014e+07	196589	53052.8	274763	1.24562	0.0331175	0.114057	0.00969214	-6.68897	down
pmp000416	C16H12O5	3'-Methoxydaidzein	Flavonoids	Isoflavones	21913-98-4	3	85073.2	128744	106814	3801.08	8987.9	10046.7	1.24133	0.0141155	0.0792269	0.0712209	-3.81156	down
pme0490	C6H5NO2	Nicotinic acid (Vitamin B3)	Others	Vitamin	59-67-6	2	1.31036e+07	1.12045e+07	8.61487e+06	5.08346e+07	5.80108e+07	7.70713e+07	1.25189	0.020406	0.091411	5.64703	2.49749	up
pme1210	C5H11NO2S	L-Methionine	Amino acids and derivatives	Amino acids and derivatives	63-68-3	1	1.84506e+06	2.14513e+06	1.85199e+06	225922	513504	203188	1.21868	0.000313562	0.0184297	0.161346	-2.63177	down
pme1611	C21H22O10	Isohemiphloin	Flavonoids	Flavanones	3682-02-8	3	1.22441e+06	1.06187e+06	1.89255e+06	16675	46597.9	23932.8	1.25736	0.0328802	0.114057	0.0208685	-5.58253	down
pme0193	C5H10N2O3	L-Glutamine	Amino acids and derivatives	Amino acids and derivatives	56-85-9	3	296215	218612	221635	16300.7	55053.3	9307.49	1.17144	0.0041469	0.0498276	0.109526	-3.19066	down
mws1474	C18H16O7	5,7-Dihydroxy-3',4',5'-trimethoxyflavone	Flavonoids	Flavones	18103-42-9	2	9	9	9	6.6122e+06	7.52245e+06	9.18063e+06	1.27632	0.0092295	0.0641339	863529	19.7199	up
Zbzp002318	C15H27NO4	heliocurassavicine	Alkaloids	Pyrrole alkaloids	82354-34-5	2	580092	611711	820143	4.94602e+06	3.5667e+06	2.7464e+06	1.24236	0.0391047	0.124606	5.59613	2.48443	up
Lasp008178	C27H24O9	Butesuperin B	Flavonoids	Isoflavones	-	2	338799	439602	308623	33832.9	11875.3	33265.3	1.23355	0.011552	0.0703176	0.0726511	-3.78287	down
pme1178	C10H13N5O5	Guanosine	Nucleotides and derivatives	Nucleotides and derivatives	118-00-3	1	5.55946e+07	3.72336e+07	7.65357e+07	2.57148e+06	5.15572e+06	4.97713e+06	1.24277	0.0434969	0.132915	0.075012	-3.73673	down
MWSHY0054	C18H16O7	Eupatorin; 3',5-Dihydroxy-4',6,7-Trimethoxyflavone	Flavonoids	Flavones	855-96-9	1	48345	5802.32	21925.2	1.88183e+07	2.1144e+07	2.63559e+07	1.25739	0.0100309	0.0660074	871.776	9.76781	up
Hmmn006338	C15H18O4	Armexifolin	Terpenoids	Sesquiterpenoids	64929-15-3	2	19689	13829.7	15146.5	229855	271282	265783	1.27215	0.00252473	0.0402681	15.7591	3.97812	up
Lmhp011388	C21H36O4	2-α-Linolenoyl-glycerol*	Lipids	Glycerol ester	55268-58-1	1	4.29837e+07	4.13755e+07	2.53437e+07	2.43003e+06	4.32153e+06	5.61638e+06	1.23194	0.026213	0.103197	0.11274	-3.14892	down
Zjgp101332	C42H64O16	24-hydroxyglucoglycyrrhizin	Terpenoids	Triterpene Saponin	-	1	443679	603966	561259	9	9	9	1.27639	0.00789117	0.060886	1.67816e-05	-15.8628	down
pmn001702	C21H18O12	Tetahydroxyflavone-7-O-glucuronide	Flavonoids	Flavones	-	1	1.89115e+06	2.35111e+06	3.08794e+06	7657.38	2797.81	4678.61	1.26988	0.0198264	0.0898613	0.00206458	-8.91994	down
pmb2591	C13H14N2O3	N-Acetyl-L-Tryptophan	Amino acids and derivatives	Amino acids and derivatives	1218-34-4	1	4.13544e+06	5.27627e+06	4.6345e+06	73247.6	108789	270355	1.24782	0.00419287	0.0501189	0.0322074	-4.95647	down
mws0655	C8H10NO6P	Pyridoxal-5'-phosphate	Others	Vitamin	54-47-7	3	73192.2	70632.6	94104.8	7512.63	26055.7	10624.2	1.1775	0.00293437	0.0415312	0.185738	-2.42866	down
pme1184	C10H13N5O4	2'-Deoxyguanosine	Nucleotides and derivatives	Nucleotides and derivatives	961-07-9	3	6.07298e+06	5.20226e+06	9.37175e+06	601723	2.00339e+06	1.1519e+06	1.17115	0.0370737	0.121663	0.181964	-2.45828	down
Lmgp004731	C21H20O10	Genistein-7-O-galactoside	Flavonoids	Isoflavones	-	1	2.18135e+07	1.63162e+07	2.05986e+07	2.05204e+06	1.51359e+06	1.50403e+06	1.2684	0.00800072	0.0609322	0.0863238	-3.5341	down
pmp000585	C24H22O13	Apigenin-7-O-(6''-malonyl)glucoside	Flavonoids	Flavones	86546-87-4	2	5.38604e+06	6.71234e+06	7.1698e+06	306183	285976	359623	1.27357	0.00750965	0.060365	0.0493966	-4.33944	down
Lasp006564	C20H18O8	5'-Demethylaquillochin(iso-01)	Lignans and Coumarins	Lignans	-	1	875833	950642	1.04055e+06	5.12705e+06	4.60673e+06	6.63974e+06	1.26381	0.0173687	0.0854364	5.71098	2.51374	up
pme2596	C8H9NO4	4-Pyridoxic acid	Others	Vitamin	82-82-6	2	1.03152e+07	1.34807e+07	1.10521e+07	1.79593e+06	2.96086e+06	1.83667e+06	1.24788	0.00464535	0.0520455	0.189206	-2.40197	down
HJN088	C18H24O12	Licoagroside B	Others	Ketone compounds	-	1	1.29589e+07	1.35991e+07	1.44988e+07	24533.3	40450.2	33912.1	1.27506	0.00106731	0.0289051	0.00240875	-8.6975	down
mws0052	C21H18O11	Baicalin*	Flavonoids	Flavones	21967-41-9	1	3.5361e+07	3.10497e+07	2.92727e+07	206706	98569.4	84866.8	1.26966	0.00321106	0.0435009	0.00407743	-7.93812	down
Wbmp007965	C20H26O3	7-Oxodehydroabietic acid	Terpenoids	Ditepenoids	-	2	403350	692434	995003	1.5102e+07	1.40338e+07	9.98455e+06	1.252	0.0147111	0.0802107	18.7109	4.2258	up
pmb3045	C23H22O13	Tricin-7-O-Glucuronide	Flavonoids	Flavones	-	2	1.57299e+07	1.79049e+07	2.73362e+07	42770.5	15533.2	18606.8	1.2696	0.0294417	0.107679	0.00126143	-9.63073	down
Zmcn005156	C26H26O12	4,5-O-Dicaffeoylquinic Acid Methyl Ester	Phenolic acids	Phenolic acids	-	3	1.85427e+06	1.27817e+06	2.44958e+06	143794	52443.2	95233.7	1.24353	0.0341773	0.117008	0.0522161	-4.25936	down
Laxp004658	C15H20O5	Phaseic Acid	Terpenoids	Sesquiterpenoids	24394-14-7	1	1.35487e+06	1.38935e+06	1.03281e+06	150181	184315	248604	1.25523	0.00801278	0.0609322	0.154381	-2.69544	down
MWSslk090	C16H22O11	Monotropein	Terpenoids	Monoterpenoids	5945-50-6	3	132136	233713	229001	18520	25723.5	11649.5	1.23909	0.0307199	0.109877	0.0939613	-3.41179	down
Qmyp122008	C15H22O3	3H-Naphth[1,8ab]oxirene-7-acetic acid	Terpenoids	Sesquiterpenoids	-	3	29388.6	82538.6	60020	606058	847134	586602	1.23535	0.0151884	0.0809229	11.8629	3.56839	up
Lmhn002895	C23H20O12	Feruloylcaffeoyltartaric acid	Phenolic acids	Phenolic acids	-	3	2.15038e+06	1.5266e+06	1.00125e+06	9	9	9	1.27542	0.0424924	0.132014	5.77141e-06	-17.4026	down
mws1172	C22H22O10	Trifolirhizin (Maackiain-3-O-glucoside)	Flavonoids	Isoflavones	6807-83-6	3	185058	295861	258823	33227.1	42098.4	31425.3	1.25847	0.0220777	0.0963333	0.144308	-2.79278	down
MWSmce001	C9H8O4	5-Acetylsalicylic acid	Phenolic acids	Phenolic acids	13110-96-8	2	268590	352915	509258	2.69639e+06	3.51556e+06	3.07133e+06	1.25348	0.00447789	0.0516524	8.20976	3.03734	up
pmp000013	C24H26O12	Eupatilin-7-O-glucoside	Flavonoids	Flavones	-	3	1.64939e+06	234679	286621	3.93691e+06	4.13766e+06	6.77368e+06	1.11618	0.0264593	0.103497	6.84034	2.77407	up
Lmmp004720	C37H34O20	Apigenin-7-O-(2''-feruloyl)glucuronide-4'-O-glucuronide	Flavonoids	Flavones	-	2	1.14867e+08	9.87821e+07	153182735	388890	225185	74111.5	1.26081	0.0170304	0.0854364	0.00187603	-9.0581	down
pme1109	C5H5N5O	Guanine	Nucleotides and derivatives	Nucleotides and derivatives	73-40-5	1	4.93385e+06	3.06494e+06	5.3916e+06	193312	1.57617e+06	362756	1.10093	0.0165465	0.0849616	0.159236	-2.65076	down
MWS201437	C10H18N2O5	Leu-Asp	Amino acids and derivatives	Amino acids and derivatives	32949-40-9	2	3.2425e+07	5.02477e+07	6.01267e+07	1.11765e+06	6.34815e+06	1.64573e+06	1.19768	0.0274423	0.105331	0.0638065	-3.97015	down
Smjn005692	C15H18O7S	deacetvlmatlicarin-8-O-sulfite	Terpenoids	Sesquiterpenoids	-	2	20103435	2.78543e+07	1.67188e+07	242960	208574	502114	1.26365	0.0231666	0.0978852	0.0147449	-6.08364	down
Zjxp110320	C15H22O3	2α-Hydroxycostic acid*	Terpenoids	Sesquiterpenoids	-	1	87979.4	58656.1	39953.8	1.31297e+06	2.33675e+06	1.72418e+06	1.2598	0.0281114	0.105717	28.8007	4.84803	up
Cmcp008329	C20H30O2	Sandaracopimaric acid	Terpenoids	Ditepenoids	471-74-9	1	4955.43	7134.61	7527.86	3.04349e+06	2.24347e+06	4.28238e+06	1.2726	0.0330066	0.114057	487.786	8.93011	up
Lmjn002774	C21H32O12	Darendoside B	Phenolic acids	Phenolic acids	94410-28-3	3	3.06128e+06	3.09066e+06	2.14132e+06	536306	255278	389220	1.23799	0.0125309	0.0741249	0.142381	-2.81217	down
pmp000017	C12H12O2	Butylidenephthalide	Others	Lactones	72917-31-8	3	67864.6	37196.7	25578.1	345139	395801	389174	1.23771	0.000113561	0.0119084	8.65063	3.11281	up
pmp001099	C15H17NO3	Platydesmine	Alkaloids	Quinoline alkaloids	2824-86-4	3	22392.4	46446.4	31865.2	257003	290548	361578	1.2486	0.00994672	0.0659894	9.02774	3.17436	up
Zmgn002106	C11H13NO3	N-Acetyl-L-phenylalanine	Amino acids and derivatives	Amino acids and derivatives	2018-61-3	1	3.19791e+07	4.36997e+07	2.73878e+07	2.3339e+06	4.45623e+06	3.18408e+06	1.25236	0.0221768	0.0963333	0.0967743	-3.36923	down
pme3968	C6H7N5O	7-Methylguanine	Nucleotides and derivatives	Nucleotides and derivatives	578-76-7	3	7.17786e+06	7.51985e+06	5.21103e+06	356084	2.24753e+06	524121	1.12831	0.00438287	0.0512652	0.157104	-2.67021	down
Zajp000573	C7H13NO2	N-(4-oxopentyl)-acetamide	Alkaloids	Alkaloids	-	1	2.82205e+06	2.85491e+06	2.4104e+06	60348	158484	117053	1.25679	0.00223827	0.0396905	0.0415321	-4.58963	down
Wmkn002777	C27H30O13	7-Hydroxy-3''-methoxy-isoflavone-7-primeveroside	Flavonoids	Isoflavones	-	3	260943	184039	272022	47154.2	29945.6	57400.4	1.23265	0.014088	0.0792269	0.187586	-2.41437	down
Qmyp122019	C15H20O3	Tessaric acid(ISO1)	Terpenoids	Sesquiterpenoids	-	2	131917	140407	65020	1.08349e+06	878201	828523	1.24229	0.00540284	0.0544295	8.27113	3.04808	up
Lcmp122908	C20H30O2	trans-communic acid	Terpenoids	Ditepenoids	-	3	6879.09	7630.61	9716.17	2.38867e+06	2.65795e+06	3.58419e+06	1.27428	0.0155569	0.082316	356.264	8.4768	up
Wafn002827	C16H22O9	Dihydroferulic acid glucoside	Phenolic acids	Phenolic acids	-	2	488487	460724	822106	4.98753e+06	2.78097e+06	3.9671e+06	1.23351	0.0314675	0.111551	6.62535	2.728	up
MWSmce157	C7H13NO2	Stachydrine	Alkaloids	Pyrrole alkaloids	471-87-4	3	823154	784978	748217	6703.69	3579.13	4466.57	1.27295	0.000752271	0.0262188	0.00625943	-7.31975	down
Lmmp003783	C21H18O13	Quercetin-3-O-glucuronide	Flavonoids	Flavonols	22688-79-5	3	6.75657e+06	6.57135e+06	4.36193e+06	103375	47091.8	111715	1.26303	0.0170298	0.0854364	0.014821	-6.07621	down
Hmln003405	C20H16O12	Ellagic acid-4-O-rhamnoside	Tannins	Tannin	-	3	9	9	9	408765	442214	534873	1.2763	0.00660092	0.0587966	51327.8	15.6475	up
pmb3062	C17H22O10	1-O-Eudesmoylquinic acid	Phenolic acids	Phenolic acids	-	3	30268.2	21961.6	19301.8	624013	417204	381616	1.2658	0.0268193	0.104197	19.891	4.31404	up
Wbkp003888	C13H13NO3	Ethyl 1,2-dihydro-1-methyl-2-oxoquinoline-4-carboxylate	Alkaloids	Alkaloids	-	2	254537	331436	237553	2.58769e+06	2.14393e+06	2.7042e+06	1.26843	0.00492738	0.0520455	9.02924	3.1746	up
Lmmp004807	C38H36O21	Chrysoeriol-7-O-[2''-O-(2'''-Feruloyl)glucuronyl]glucuronide	Flavonoids	Flavones	-	2	1.11087e+08	1.32609e+08	1.24397e+08	466529	273890	237276	1.27315	0.00261263	0.0402681	0.00265611	-8.55647	down
MWS5173	C4H5N3O	Isocytosine	Nucleotides and derivatives	Nucleotides and derivatives	108-53-2	3	59830.5	229745	148772	663503	1.17698e+06	843413	1.16375	0.0285189	0.106285	6.12276	2.61418	up
pmp000791	C15H10O5	Moracin Y	Phenolic acids	Phenolic acids	1252581-54-6	3	386339	338992	420803	17241.4	17995.1	14134.6	1.27395	0.0041057	0.0496371	0.0430763	-4.53696	down
MWSslk002	C21H20O10	Sophoricoside	Flavonoids	Isoflavones	152-95-4	2	2.10255e+07	1.58165e+07	1.98734e+07	1.92118e+06	1.70824e+06	1.77703e+06	1.27225	0.00834494	0.0619028	0.0953261	-3.39099	down
MWSprf018	C30H48O2	3-Hydroxylup-20(29)-en-28-al (Betulinaldehyde)	Terpenoids	Triterpene	13159-28-9	2	809842	939896	454373	65380.6	33319.6	44819.6	1.24673	0.0413407	0.130291	0.0651146	-3.94088	down
pmf0373	C11H10N2O	Caulilexin C	Alkaloids	Plumerane	30536-48-2	3	5523.43	42960.4	9738.85	241972	395810	340442	1.18634	0.0158505	0.0830583	16.8014	4.07051	up
pme1187	C10H14N2O6	5-Methyluridine	Nucleotides and derivatives	Nucleotides and derivatives	1463-10-1	2	298952	192955	382441	33361.8	72741.7	30369.6	1.20114	0.0395192	0.125407	0.156086	-2.67959	down
Lazn005263	C21H28O8	1-(4-Hydroxy-3-Methoxyphenyl)-2-(4-(3-Hydroxypropyl)-2,6-Dimethoxyphenoxy)Propane-1,3-Diol	Lignans and Coumarins	Lignans	-	3	9684.45	10772	6670	81556.6	139482	128094	1.25786	0.0257126	0.102098	12.8705	3.686	up
Hmyn007087	C25H49O11P	LysoPI 16:0	Lipids	Glycerol ester	-	2	36441.8	42096.1	30689.5	5198.79	3911.96	6163.46	1.25995	0.00882557	0.0636269	0.139839	-2.83817	down
Lmzn001572	C27H26O18	Scutellarein-7-O-glucuronosyl-(1->2)-glucuronide	Flavonoids	Flavones	150641-65-9	1	9.87807e+06	8.51377e+06	1.53269e+07	15940.5	9479.05	6670	1.27148	0.0326797	0.113885	0.000951681	-10.0372	down
Lmtp002474	C26H28O14	Apigenin-6-C-(2''-glucosyl)arabinoside	Flavonoids	Flavones	-	1	7604525	8.26939e+06	5.62356e+06	330137	1025350	1625900	1.16378	0.00702053	0.0593274	0.138685	-2.85011	down
Lazn002043	C16H23N5O7	Saikachinoside A	Alkaloids	Alkaloids	-	2	202485	209860	346714	34511.3	41911	30196.6	1.25134	0.0428315	0.132456	0.140462	-2.83175	down
Zbdp002392	C8H6O4	Piperonylic acid	Organic acids	Organic acids	94-53-1	3	193558	230552	333332	2.24945e+07	1.09761e+07	1.44584e+07	1.26595	0.0439496	0.133762	63.2773	5.98362	up
Latp003285	C17H20O8	2,5-Dimethyl-7-hydroxychromone glucoside	Others	Chromone	-	3	101897	139219	177877	3.70653e+06	2.50884e+06	3.8927e+06	1.26457	0.0173482	0.0854364	24.1247	4.59244	up
Lmtn001569	C20H29NO12	2-Glucosyl-glucosyloxy-2-phenylacetic acid amide	Alkaloids	Alkaloids	-	3	13881.9	26804.6	16018.5	916454	821859	858110	1.26937	0.000856682	0.0278361	45.7883	5.51691	up
pma2088	C27H30O17	Quercetin-3,4'-O-di-glucoside	Flavonoids	Flavonols	29125-80-2	3	690910	572600	584907	111715	66000.3	95580.6	1.2575	0.00225377	0.0396905	0.147854	-2.75775	down
Lskp211331	C20H26O2	14-Didehydrovouacapane-5a-ol(ISO3)	Terpenoids	Ditepenoids	-	3	35019	30888.5	35588.8	2.39037e+06	2.41132e+06	2.17273e+06	1.27611	0.00110258	0.0289051	68.716	6.10257	up
Lcsp001977	C15H27N3O7	Thr-Glu-Ile	Amino acids and derivatives	Amino acids and derivatives	-	1	957951	787254	1.58861e+06	79034.4	365776	26993.5	1.07356	0.0432058	0.132724	0.141521	-2.82092	down
Zbqn004682	C14H14N2O5	N-(malonyl)tryptophan	Amino acids and derivatives	Amino acids and derivatives	-	1	798210	1.291e+06	1.43778e+06	47475.3	82008.1	104436	1.24904	0.0289138	0.106285	0.0663229	-3.91435	down
Lamp008170	C18H20O6	5,7,4'-Tri-O-Methylcatechin	Flavonoids	Other Flavonoids	105330-59-4	2	3.00292e+06	1.91213e+06	2.74306e+06	34101.2	28255.5	50572.3	1.26977	0.0166479	0.0849616	0.0147463	-6.0835	down
Lsjp211255	C30H48O2	1-Hydroxylup-20(29)-en-3-one (Glochidonol)	Terpenoids	Triterpene	23963-54-4	1	3.13022e+06	4.74794e+06	4.79446e+06	24914.7	49085.7	50863.4	1.26849	0.0166682	0.0849616	0.00985305	-6.66521	down
Lskp211249	C22H26O6	epieudesmin	Lignans and Coumarins	Lignans	-	2	9	9	9	9.11398e+06	5.64702e+06	7.36836e+06	1.27624	0.0179157	0.0864674	819606	19.6446	up
Lmmp005104	C37H34O20	Apigenin-7-O-(2''-feruloyl)glucuronide-5-O-glucuronide	Flavonoids	Flavones	-	1	7.71678e+07	6.1778e+07	104239395	397953	149373	69015.2	1.25788	0.0227542	0.0973913	0.00253445	-8.62411	down
pmp000195	C25H24O13	6''-O-Malonylglycitin	Flavonoids	Isoflavones	137705-39-6	3	2088540	1186595	2020910	41680	196683	185125	1.18614	0.0275211	0.105331	0.0799631	-3.64452	down
pmp000284	C11H10O5	Fraxidin (8-Hydroxy-6,7-dimethoxycoumarin)	Lignans and Coumarins	Coumarins	525-21-3	1	91437.8	61844.8	101135	1.05893e+06	1.62842e+06	1.51548e+06	1.26344	0.0166919	0.0849616	16.5194	4.04609	up
Lmtp002942	C25H26O13	Apigenin-6,8-di-C-arabinoside*	Flavonoids	Flavones	-	1	6.79684e+06	6.85739e+06	7.7706e+06	162936	166500	185095	1.27606	0.0020274	0.0388646	0.0240156	-5.37988	down
MWSslk185	C20H20O8	5-Demethylnobiletin; 5-Hydroxy-6,7,8,3',4'-Pentamethoxyflavone	Flavonoids	Flavones	2174-59-6	2	87706.7	35988.6	67630.2	303132	317440	343493	1.21715	0.000245582	0.0157377	5.03887	2.3331	up
Lhmp122023	C19H20O12	3-O-caffeoyl malonyl quinic acid	Others	Others	-	3	243545	352105	489175	24110625	25163885	13732300	1.26428	0.0297999	0.107931	58.0802	5.85997	up
Qmqp101742	C35H40O11	Chloramultilide D	Terpenoids	Sesquiterpenoids	1000995-49-2	3	1.19555e+07	9.21718e+06	7.58531e+06	9392.82	20478.8	84577.3	1.24672	0.0173419	0.0854364	0.00397972	-7.97312	down
Lkmp122410	C15H22O3	Gallicadiol	Terpenoids	Sesquiterpenoids	7715-89-1	1	100731	73355	81690.6	784166	806346	571020	1.26565	0.0128879	0.075082	8.45087	3.0791	up
Hmyn007168	C22H45O9P	LysoPG 16:0	Lipids	Glycerol ester	-	3	3.04484e+06	3.03734e+06	2.66812e+06	376867	656552	410043	1.25269	0.000177413	0.0141135	0.164962	-2.5998	down
MWS00275g	C9H11NO3	DL-O-tyrosine	Amino acids and derivatives	Amino acids and derivatives	2370-61-8	1	935358	940481	1.61874e+06	180160	228033	111414	1.22584	0.0458617	0.136757	0.148689	-2.74963	down
pmb2792	C18H30O3	13-Hydroxy-6,9,11-octadecatrienoic acid	Lipids	Free fatty acids	74784-20-6	2	1.76098e+06	1.55643e+06	2.99356e+06	121568	80246.2	101643	1.26179	0.046656	0.13699	0.0480841	-4.3783	down
Cmjp002460	C21H32O8	Sonchuside C	Terpenoids	Sesquiterpenoids	-	3	9	9	9	135070	90035	76690	1.27577	0.0294711	0.107679	11177.6	13.4483	up
pme2816	C20H28O2	4-Oxoretinol	Others	Vitamin	62702-55-0	3	41002.5	10011.2	102202	313168	341475	228661	1.07125	0.00570662	0.0546017	5.7651	2.52735	up
Lskp211350	C22H30O5	Phanginin C(ISO1)	Terpenoids	Ditepenoids	-	2	9	9	9	47998.9	94390.5	96632.4	1.27471	0.0373822	0.122067	8852.66	13.1119	up
Zjxp110319	C15H22O3	3α-Hydroxycostic acid*	Terpenoids	Sesquiterpenoids	-	1	33398.1	39105.6	31778.1	1.18137e+06	2.42377e+06	1.82154e+06	1.26851	0.0385273	0.123664	52.0386	5.70151	up
Lssp210438	C16H12O6	3'-O-methylorobol(ISO1)	Others	Others	-	2	2.56789e+07	2.946e+07	42331313	2.61683e+06	2.22926e+06	3.34704e+06	1.26252	0.0270815	0.104827	0.0840579	-3.57247	down
Zmxp002867	C28H32O16	Chrysoeriol-5,7-di-O-glucoside	Flavonoids	Flavones	-	3	398790	358296	647616	43345	113520	84998.5	1.19608	0.0445151	0.134331	0.172181	-2.538	down
mws0011	C17H24O9	Syringin	Phenolic acids	Phenolic acids	118-34-3	3	3.18832e+06	2.56156e+06	2.59392e+06	611296	544657	484466	1.26662	0.00678634	0.0589333	0.196603	-2.34664	down
Lmmp004300	C42H40O25	Apigenin-7-O-{3''-O-[2'''-O-(2''''-p-Coumaroyl)glucuronyl]glucuronyl}glucuronide	Flavonoids	Flavones	-	3	3.76372e+07	2.00895e+07	1.95598e+07	217557	108514	52817.8	1.25749	0.0497016	0.141209	0.00490239	-7.6723	down
Lmgp004959	C29H34O16	Tricin-7-O-neohesperidoside*	Flavonoids	Flavones	53766-40-8	3	1.6919e+06	2.44952e+06	2.40478e+06	30010	370972	180120	1.12737	0.00757503	0.0604691	0.0887694	-3.49379	down
Hmgp003086	C29H34O16	Tricin-7-O-rutinoside*	Flavonoids	Flavones	-	3	1.6919e+06	2.44952e+06	2.40478e+06	30010	370972	180120	1.12737	0.00757503	0.0604691	0.0887694	-3.49379	down
pmb0108	C19H18O8	Feruloyl syringic acid	Phenolic acids	Phenolic acids	-	3	40617	63350	70020	338094	283937	285934	1.24801	0.0012498	0.0297725	5.21859	2.38366	up
Lsmp010418	C13H22O3	Corchoionol A	Terpenoids	Monoterpenoids	189351-22-2	3	201223	200908	325606	1.61234e+06	1.62357e+06	2.33704e+06	1.25117	0.0188758	0.0888282	7.65791	2.93695	up
Lmmp007120	C33H30O16	Tricin-7-O-(2''-feruloyl)glucuronide	Flavonoids	Flavones	-	3	874787	1.07182e+06	1.49745e+06	25630.3	17216.9	22859.2	1.27067	0.0255863	0.101772	0.0190782	-5.71193	down
Lmjp005363	C15H22O3	Arteannuin N	Terpenoids	Sesquiterpenoids	207446-92-2	1	217491	42983.2	291371	1.00771e+06	1.20181e+06	949728	1.09716	0.00121088	0.0297725	5.72487	2.51724	up
MWSmce025	C16H18O10	Fraxetin-8-O-glucoside (Fraxin)	Lignans and Coumarins	Coumarins	524-30-1	2	160557	155661	367561	1.48852e+06	1427120	1630960	1.22548	0.000174305	0.0141135	6.64923	2.73319	up
Wbmn005130	C23H30O12	6-O-Vanilloylajugol(ISO-1)	Terpenoids	Monoterpenoids	-	3	471229	447415	361379	21044.9	33772.4	33796.1	1.2655	0.00630788	0.0577472	0.0692279	-3.8525	down
Lssp210123	C20H20O6	α-Conidendrin	Others	Others	-	3	346066	266920	581637	9.0796e+06	7.76238e+06	1.00338e+07	1.26136	0.00511835	0.0528062	22.4973	4.49168	up
Lmzp004885	C17H14O7	Tricin (5,7,4'-Trihydroxy-3',5'-dimethoxyflavone)	Flavonoids	Flavones	520-32-1	2	1.37054e+06	2.22497e+06	1.54763e+06	31037.3	19792.3	46681.9	1.26402	0.0230531	0.0977638	0.0189596	-5.72093	down
Lmjp004839	C18H16O8	Arcapillin (2',4',5-trihydroxy-5',6,7-trimethoxyflavone)	Flavonoids	Flavones	83162-82-7	2	3734.49	11670	7052.24	462514	526399	496097	1.2609	0.00123417	0.0297725	66.1276	6.04718	up
Zmsn002575	C17H24O11	Hastatoside	Terpenoids	Monoterpenoids	50816-24-5	3	160263	111989	193383	1.34542e+06	973873	1.16642e+06	1.25555	0.00866247	0.063042	7.48593	2.90418	up
Wbmp003302	C10H12O2	Frambinone	Others	Ketone compounds	-	3	9	9	9	564617	645165	509736	1.27643	0.00467514	0.0520455	63685.9	15.9587	up
Lskp211483	C30H46O4	19-Hydroxy-3-oxo-24-norolean-12-en-28-oic acid(ISO2)	Terpenoids	Triterpene	-	2	1.05953e+06	884470	1.10631e+06	154414	55015	45251.6	1.22389	0.00117464	0.0297725	0.0834933	-3.5822	down
Zmdp001647	C10H18N2O5	γ-Glutamyl-L-valine	Amino acids and derivatives	Amino acids and derivatives	-	1	1.21749e+06	1.73828e+06	883445	86954.9	423933	21190.6	1.05184	0.0296886	0.107931	0.13859	-2.8511	down
Lmmp003487	C27H26O18	Luteolin-7-O-glucuronide-(2→1)-glucuronide	Flavonoids	Flavones	-	2	2.32016e+07	1.80774e+07	3.15397e+07	125895	21070.5	37782.4	1.2569	0.0252563	0.101751	0.00253709	-8.62261	down
MWS2076	C6H7NO	2-Aminophenol	Alkaloids	Phenolamine	95-55-6	3	328905	362404	477877	51295.2	57034	44558.5	1.26606	0.0167863	0.0851123	0.130764	-2.93496	down
Zmsp002551	C21H30O9	Ixerin D	Terpenoids	Sesquiterpenoids	93236-44-3	3	288426	235215	198597	8.36733e+06	7.06681e+06	9.12769e+06	1.27324	0.00561283	0.0546017	34.0079	5.0878	up
Lmmp006540	C34H32O17	Tricin-7-O-(2''-Sinapoyl)glucuronide	Flavonoids	Flavones	-	3	157637	226107	241685	18213.5	6676.42	5243	1.23676	0.0147016	0.0802107	0.0481796	-4.37543	down
Lmsp008264	C18H16O6	4'-Hydroxy-5,6,7-trimethoxyflavone	Flavonoids	Flavones	6938-18-7	3	223713	132729	163613	6222.49	17193.2	12717	1.23905	0.0249814	0.101751	0.0694786	-3.84729	down
Lcyp000673	C17H14O7	Prudomestin	Flavonoids	Flavonols	3443-28-5	2	1.19767e+06	1.11972e+06	906027	14602.3	24311.4	30029.5	1.26776	0.00668852	0.0589013	0.0213883	-5.54704	down
Lmmp003941	C42H40O25	Apigenin-7-O-(2''-p-Coumaroyl)glucuronide-4'-O-(2''-O-glucuronyl)glucuronide	Flavonoids	Flavones	-	3	8.00711e+06	8.70809e+06	5.30778e+06	51516.5	29113.8	2960.58	1.22426	0.0194883	0.0894325	0.00379562	-8.04145	down
Lmtp002642	C26H28O14	Apigenin-8-C-(2''-glucosyl)arabinoside	Flavonoids	Flavones	-	3	2.30743e+06	2.78781e+06	1.29901e+06	81483.8	261910	365873	1.16948	0.0453589	0.135957	0.110923	-3.17237	down
mws1639	C11H10O5	Isofraxidin	Lignans and Coumarins	Coumarins	486-21-5	1	165100	165100	214825	4539575	3.65687e+06	3.32181e+06	1.272	0.00960145	0.0653408	21.1334	4.40146	up
Qmyp101201	C19H32O8	(6R,9S)-3-Oxo-α-ionol-β-D-glucopyranoside	Terpenoids	Sesquiterpenoids	-	1	40010	26675	85569.5	5.23128e+06	3.69839e+06	4.28131e+06	1.26088	0.0102767	0.0664307	86.769	6.43911	up
pmp000411	C26H28O14	Genistein-8-C-apiosyl(1→6)glucoside	Flavonoids	Isoflavones	-	3	838171	784003	830755	60471.4	193470	183455	1.18147	0.00140876	0.030204	0.178316	-2.48749	down
Sazp010264	C45H70O10	Monogalactosyldiacylglycerol	Lipids	Free fatty acids	-	1	205776	254608	325628	10067.4	11383.8	28200.3	1.24101	0.0173113	0.0854364	0.063169	-3.98464	down
Lazn003578	C12H14O3	Trans-coniferyl aldehyde	Phenolic acids	Phenolic acids	-	3	9	9	9	1136185	1710215	1.015e+06	1.27608	0.0266458	0.103838	143015	17.1258	up
Zmln000899	C15H20O9	Syringaldehyde-4-O-glucoside	Phenolic acids	Phenolic acids	-	3	67291.5	84299.7	96285	1.45438e+06	1.12884e+06	1.42389e+06	1.27029	0.00651421	0.0582492	16.1658	4.01487	up
pmp001110	C25H26O13	Apigenin-6-C-xyloside-8-C-arabinoside	Flavonoids	Flavones	-	1	3.10655e+06	2.82277e+06	3.85895e+06	206374	465373	264526	1.24826	0.00771174	0.0606283	0.0956524	-3.38605	down
zjnp112910	C27H44O7	Rhapontisterone B	Others	Others	698975-64-3	3	9	9	9	611735	749869	1.24829e+06	1.27548	0.0460005	0.136757	96662.9	16.5607	up
pmb2975	C23H26O11	Hesperetin-3'-O-glucuronide	Flavonoids	Flavanones	1237479-05-8	3	146372	133256	200071	20398.9	33481.3	31168.7	1.24563	0.0200443	0.0901407	0.177297	-2.49576	down
Lmmp007156	C42H64O16	Ceanothic acid-3-O-glucuronic acid-glucose	Terpenoids	Triterpene Saponin	-	1	389823	525786	355756	15005	8340	1670	1.21691	0.0148744	0.0803634	0.0196757	-5.66744	down
Lmmp004361	C45H46O28	Tricin-7-O-[glucuronyl(1→3)]-[(2''-O-Feruloyl)glucuronyl](2→1)glucuronide	Flavonoids	Flavones	-	3	1.7766e+07	2.02684e+07	2.71501e+07	135242	5418.61	5005	1.22133	0.0163193	0.0846038	0.00223467	-8.80572	down
mws0863	C5H11O7P	2-Deoxyribose-5'-phosphate*	Nucleotides and derivatives	Nucleotides and derivatives	102916-66-5	3	9	9	9	630055	284225	470138	1.27533	0.0438307	0.133576	51274.7	15.646	up
pmp000417	C21H20O9	Daidzein-4'-O-glucoside	Flavonoids	Isoflavones	-	3	9	9	9	415610	690005	327045	1.27553	0.0485649	0.140576	53061.5	15.6954	up
Wasn003817	C16H26O9	Glucosyl 5,8-dihydroxy-2,6-dimethylocta-2,6-dienoic acid	Others	Others	-	3	571974	475602	631639	112881	64797.3	64290.3	1.24948	0.00455088	0.0517825	0.144096	-2.7949	down
Lmlp005572	C21H20O10	Galangin-7-O-glucoside	Flavonoids	Flavones	-	1	1.95381e+07	1.54734e+07	1.99985e+07	1.97763e+06	1.27327e+06	1.90151e+06	1.26478	0.0063842	0.0579856	0.0936628	-3.41638	down
pmn001378	C26H32O11	Pinoresinol-4-O-glucoside	Lignans and Coumarins	Lignans	41607-20-9	3	354728	304275	200572	9	9	9	1.27562	0.024177	0.0997788	3.14109e-05	-14.9584	down
MWSslk201	C21H26O10	Sec-O-Glucosylhamaudol	Others	Chromone	80681-44-3	2	29606.6	57694.2	13807.7	6.47417e+06	4.79745e+06	7.03219e+06	1.26066	0.0120048	0.071935	181.031	7.5001	up
pmp000604	C21H22O10	Rubrofusarin-6-O-glucoside	Others	Ketone compounds	132922-80-6	3	300835	268700	391038	9	9	9	1.27628	0.0128285	0.074925	2.81082e-05	-15.1186	down
Zbsp004940	C10H8O4	6-Hydroxy-7-methoxycoumarin	Lignans and Coumarins	Coumarins	-	1	1057250	710048	1605675	2.17546e+07	4.5547e+07	50094930	1.25107	0.049402	0.141122	34.805	5.12122	up
Lhdp120303	C19H32O8	Bridelionoside F	Terpenoids	Monoterpenoids	-	1	109951	110045	216835	1.93973e+06	3935315	2.60439e+06	1.24968	0.0442437	0.13395	19.4112	4.27882	up
pma0760	C25H24O15	3'-O-Methyltricetin-7-O-(6''-malonyl)glucoside	Flavonoids	Flavones	-	3	103902	235688	358476	2.09094e+06	1.7327e+06	2.92801e+06	1.20875	0.0254167	0.101751	9.67195	3.27381	up
Lafp004228	C19H30O7	(6R,9R)-3-Oxo-α-ionol-β-D-glucoside	Terpenoids	Sesquiterpenoids	-	3	9	9	9	189854	251895	158656	1.27609	0.0182372	0.0869148	22237.2	14.4407	up
MWSHC20172	C10H8O4	Isoscopoletin (6-Hydroxy-7-Methoxycoumarin)	Lignans and Coumarins	Coumarins	776-86-3	1	324465	557760	370312	1.81561e+07	3.73086e+07	2.36212e+07	1.2658	0.0449563	0.135154	63.1406	5.9805	up
Hmlp001371	C12H14N2O3	Cyclo(Tyr-Ala)	Amino acids and derivatives	Amino acids and derivatives	21754-26-7	3	9	9	9	21663.7	38230.1	26675	1.27539	0.0277162	0.10557	3206.25	11.6467	up
Lmsn002494	C19H14O12	Ellagic acid-4-O-Xyloside	Tannins	Tannin	139163-18-1	3	9	9	9	357120	750990	629867	1.27536	0.0381266	0.123363	64369.5	15.9741	up
ML10176345	C7H8O5	3-Dehydroshikimic acid	Organic acids	Organic acids	2922-42-1	2	1.93281e+06	187783	195963	1.2811e+07	1.08819e+07	1.6413e+07	1.16584	0.0094516	0.0646719	17.3127	4.11376	up
MWSHY0031	C21H18O11	Apigenin-7-O-glucuronide*	Flavonoids	Flavones	29741-09-1	1	2.69393e+06	2.07365e+06	2.01732e+06	26368.4	19727.1	9	1.03053	0.00911278	0.0641339	0.00679516	-7.20128	down
Lhhp111109	C35H40O11	Schisantherin J	Lignans and Coumarins	Lignans	135432-28-9	1	8.00513e+06	9.41836e+06	1.01955e+07	8249.26	12051.7	122465	1.22951	0.00474887	0.0520455	0.00516912	-7.59586	down
pmb1562	C21H34O4	1-Stearidonoyl-Glycerol	Lipids	Glycerol ester	-	1	3.07246e+07	2.46821e+07	2.90743e+07	883726	904005	4.80035e+06	1.19007	0.00051448	0.0211948	0.0779829	-3.6807	down
Lmmp003850	C43H42O26	Apigenin-7-O-{3''-O-[2'''-O-(2''''-Feruloyl)glucuronyl]glucuronyl}glucuronide	Flavonoids	Flavones	-	3	9.12284e+06	8.73818e+06	5.66346e+06	30903.2	24735.4	10189.6	1.26601	0.0190369	0.0889173	0.00279828	-8.48124	down
pmf0291	C5H5NO	4-Hydroxypyridine	Alkaloids	Pyridine alkaloids	626-64-2	3	125313	129789	74266.5	9	9	9	1.27538	0.0253195	0.101751	8.19752e-05	-13.5745	down
Lacp005577	C22H32O10	3-(3'-Hydroxybutyl)-2,4,4-trimethylcyclohexa-2,5-dienone malonyl glucoside	Terpenoids	Sesquiterpenoids	-	3	386029	180125	368815	9	9	9	1.275	0.041986	0.13133	2.8878e-05	-15.0797	down
pmb2654	C19H27NO12	Anthranilate-1-O-Sophoroside	Phenolic acids	Phenolic acids	-	3	2.30468e+06	2.12909e+06	1.17583e+06	201091	267833	102812	1.21899	0.0387847	0.1241	0.101921	-3.29448	down
MWSHY0088	C15H10O7	Herbacetin	Flavonoids	Flavonols	527-95-7	1	51680	54124.5	39058.9	9	9	9	1.27603	0.0092199	0.0641339	0.000186382	-12.3894	down
Lacp004368	C22H34O11	Blumenol B malonyl Glucoside	Terpenoids	Sesquiterpenoids	-	2	78360	56126.3	169877	3.30947e+06	6524510	4982350	1.25259	0.0347542	0.118082	48.6798	5.60525	up
Zjgp101331	C42H64O16	glyyunnansapogenin A-GlcA-Glc	Terpenoids	Triterpene Saponin	-	1	279977	424185	263742	9	9	9	1.27598	0.0240812	0.0995614	2.78953e-05	-15.1296	down
zjmp120214	C30H46O4	22-Hydroxy-oleanonic acid	Terpenoids	Triterpene	-	2	1.05103e+06	1.6309e+06	1.47661e+06	105168	178905	135408	1.25772	0.0175992	0.0860196	0.100872	-3.3094	down
MWSHY0111	C22H22O10	Calycosin-7-O-glucoside	Flavonoids	Isoflavones	20633-67-4	3	4.09215e+06	2.86462e+06	2.88416e+06	223306	283457	308670	1.26673	0.017416	0.0854867	0.0828614	-3.59316	down
MWSprf123	C48H78O18	Buddlejasaponin IVb	Terpenoids	Triterpene Saponin	152580-79-5	3	900406	812688	640130	9	9	9	1.27619	0.00936681	0.0646719	1.14736e-05	-16.4113	down
pmn001644	C23H20O14	Quercetin-3-O-(2''-O-acetyl)glucuronide	Flavonoids	Flavonols	-	3	21675	17664.2	55015	171623	124627	194020	1.17333	0.00947512	0.0646719	5.19606	2.37742	up
Hmgp002564	C29H30O19	Tricin-7-O-glucuronyl(2→1)glucuronide	Flavonoids	Flavones	83097-44-3	1	4.08852e+06	4.08608e+06	6.81424e+06	27807.6	14764.2	33384.3	1.26887	0.0318443	0.111989	0.00506752	-7.6245	down
Hmmp002474	C33H38O20	Apigenin-7-O-rutinoside-4'-O-glucuronide	Flavonoids	Flavones	-	3	560659	437047	299840	6885.46	11670	2814.95	1.2471	0.0298313	0.107931	0.0164699	-5.92403	down
