# Supplementary material for: Influence on the fermentation quality, microbial diversity, and metabolomics in the ensiling of sunflower stalks and alfalfa
Source: Front Plant Sci. 2024 Jan 26;15:1333207. doi: 10.3389/fpls.2024.1333207 (PMC10853385; doi:10.3389/fpls.2024.1333207)
Supplement: Supplementary file 3 [file Table_3.xlsx]

## Sheet: Sheet1
Index	Formula	Compounds	Class I	Class II	CAS	Level	A0S10_1	A0S10_2	A0S10_3	A5S5_1	A5S5_2	A5S5_3	VIP	P-value	FDR	Fold_Change	Log2FC	Type
mws1659	C15H10O5	Emodin	Quinones	Anthraquinone	518-82-1	1	127227	741612	127320	9.23754e+06	7.99868e+06	8.25555e+06	1.23947	0.000268188	0.00780669	25.5901	4.67751	up
pmp000003	C16H12O7	Nepetin (5,7,3',4'-Tetrahydroxy-6-methoxyflavone)	Flavonoids	Flavones	520-11-6	1	183304	136526	226360	1.1375e+06	809951	825912	1.27166	0.0157213	0.0565133	5.07765	2.34416	up
mws4057	C15H10O4	7,4'-Dihydroxyflavone	Flavonoids	Flavones	2196-14-7	3	53920	56868.1	41804.3	2.20427e+06	2.85987e+06	2.71184e+06	1.29924	0.00602608	0.0328165	50.9591	5.67127	up
Lman002117	C15H18O9	Grevilloside Q	Others	Ketone compounds	1708967-64-9	3	84950.9	10406.7	31285.4	1.12432e+06	1.01797e+06	868178	1.23004	0.00337894	0.0250707	23.7713	4.57115	up
Cmdn004031	C29H36O16	R-Campneoside II	Phenolic acids	Phenolic acids	91050-24-7	3	9	9	9	476649	371003	565794	1.30129	0.0139802	0.0517497	52349.9	15.6759	up
zjgp122326	C12H15NO7	Pyridine-4-formyl-O-β-D-glucopyranoside	Others	Others	-	2	4.63224e+06	5.40363e+06	4.7478e+06	691345	692699	982447	1.29332	0.00107402	0.0138542	0.160075	-2.64318	down
mws4113	C21H22O5	3'-Hydroxy-4'-O-methylglabridin	Flavonoids	Other Flavonoids	175554-11-7	2	422491	142354	483618	2.02321e+06	1.75823e+06	1.73495e+06	1.19222	0.000480058	0.00951788	5.26141	2.39545	up
Zmyn002919	C8H8O2	2-Methylbenzoic acid	Phenolic acids	Phenolic acids	118-90-1	3	9907.62	8772.63	17352	98361.9	100880	108791	1.2761	3.09022e-05	0.00329496	8.54883	3.09573	up
Lmhn004976	C16H12O6	Aracarpene 2	Flavonoids	Isoflavones	-	3	846487	801835	688523	9.45467e+06	8.53969e+06	8.65526e+06	1.30072	0.000972259	0.0133024	11.4041	3.51148	up
pmn001689	C18H32O4	9-Hydroxy-12-oxo-15(Z)-octadecenoic acid	Lipids	Free fatty acids	-	3	1.77937e+06	1.2932e+06	1.64086e+06	9.39704e+06	9.2869e+06	9.37284e+06	1.29439	0.000181063	0.00638685	5.95252	2.5735	up
Zadn009075	C18H32O4	Hydroperoxylinoleic acid	Lipids	Free fatty acids	34444-18-3	2	1.77937e+06	1.2932e+06	1.64086e+06	9.39704e+06	9.2869e+06	9.37284e+06	1.29439	0.000181063	0.00638685	5.95252	2.5735	up
HJN091	C22H22O10	Prunetin-4'-O-glucoside(Prunitrin)	Flavonoids	Isoflavones	154-36-9	3	49534.1	49488.1	71407.8	1.50541e+06	1.69574e+06	1.38162e+06	1.29779	0.00365626	0.0256605	26.8894	4.74897	up
Lhmp122201	C16H12O4	dalbergin	Lignans and Coumarins	Coumarins	482-83-7	1	116095	49114.2	87984	5.59522e+06	8.41096e+06	7.15661e+06	1.29125	0.0133423	0.0507712	83.5834	6.38514	up
Hmsp000364	C7H13NO2	L-Cyclopentylglycine	Amino acids and derivatives	Amino acids and derivatives	2521-84-8	2	728180	600690	766897	1.65609e+07	1.63236e+07	1.48553e+07	1.30063	0.00112521	0.0138937	22.7791	4.50964	up
Laxp008852	C17H14O5	(2Z)-2-(3,4-Dimethoxybenzylidene)-6-Hydroxy-1-Benzofuran-3(2H)-One	Flavonoids	Other Flavonoids	1322574-14-0	1	205810	236001	152872	2.62205e+07	3.38173e+07	2.63649e+07	1.30024	0.00759976	0.0371008	145.292	7.18281	up
pme3233	C16H12O5	Calycosin	Flavonoids	Isoflavones	20575-57-9	1	2.12311e+06	2.07666e+06	1188275	1.55708e+07	1.82537e+07	1.66908e+07	1.28425	0.00084661	0.0122176	9.37544	3.22889	up
pmn001571	C18H18O5	Agrimonolide	Lignans and Coumarins	Coumarins	21499-24-1	3	397614	273614	250296	8.45934e+06	9.38979e+06	5.23127e+06	1.29227	0.0277559	0.0786771	25.0459	4.6465	up
Lmhn007973	C36H56O9	Quinovic acid-3-O-rhamnoside	Terpenoids	Triterpene	104055-76-7	2	204453	277345	197869	1.79324e+07	1.94509e+07	1.62596e+07	1.30086	0.00269718	0.0222421	78.9252	6.30241	up
mws0905	C16H14O4	Medicarpin	Flavonoids	Isoflavones	32383-76-9	1	33956.5	23584.7	25352.1	872458	1.23731e+06	886880	1.29753	0.0146991	0.053959	36.1507	5.17595	up
Yacn003968	C11H13NO3	Cantleyine	Alkaloids	Alkaloids	30333-81-4	1	1.03195e+06	1.00387e+06	928364	1.26458e+07	1.46786e+07	11922952	1.30108	0.0045734	0.0288524	13.2405	3.72689	up
Zbqn006635	C15H8O5	2-Acetoxy-4-hydroxyanthraquinone	Quinones	Anthraquinone	-	3	51013.3	65158.1	76331.8	898816	1.06577e+06	1.04043e+06	1.2953	0.00261174	0.0217708	15.6102	3.96442	up
mws1189	C6H10O7	D-Galacturonic acid*	Others	Saccharides	685-73-4	1	1.98842e+06	165784	1.07486e+06	7.02249e+06	5.97397e+06	6.49567e+06	1.07754	0.00230697	0.0203532	6.03646	2.5937	up
mws1715	C10H13N5O3	Cordycepin (3'-Deoxyadenosine)*	Nucleotides and derivatives	Nucleotides and derivatives	73-03-0	2	967983	866621	912619	6.73046e+06	5.43834e+06	6.27271e+06	1.29853	0.00497635	0.0298235	6.71278	2.74691	up
Layp007325	C15H12O4	Bauhinoxepin J	Others	Alcohol compounds	942513-05-5	3	1.67226e+06	1.51672e+06	1.17499e+06	2.02141e+07	2.71186e+07	2.68519e+07	1.29478	0.00906092	0.0404966	16.9993	4.08741	up
pmb3031	C20H20O9	Tricin-4'-O-glycerol	Flavonoids	Flavones	-	3	94320.7	61418.5	29994	770313	706157	481038	1.25262	0.0178376	0.0604802	10.5394	3.39771	up
mws1434	C21H20O10	Apigenin-6-C-glucoside (Isovitexin)*	Flavonoids	Flavones	38953-85-4	1	855521	752860	741272	1.48769e+07	7.66452e+06	1.43979e+07	1.28418	0.0384163	0.0951991	15.7212	3.97464	up
Xmyn008071	C16H12O6	Gnetifolin B*	Flavonoids	Flavones	140671-06-3	1	902306	862932	746143	9.35394e+06	8.79339e+06	8.94016e+06	1.30093	0.000170074	0.00638685	10.7859	3.43107	up
pmc0281	C15H21N5O8	Ribosyladenosine	Nucleotides and derivatives	Nucleotides and derivatives	-	3	1.76009e+06	1.06247e+06	1.44225e+06	7.04115e+06	8.06694e+06	9.36904e+06	1.27616	0.00612735	0.0331336	5.73932	2.52088	up
Lmmp007480	C15H12O4	2,4,4'-trihydroxychalcone*	Flavonoids	Chalcones	-	1	1.7566e+06	1.50312e+06	1.23653e+06	1.92491e+07	2.58055e+07	2.58462e+07	1.29441	0.00941246	0.0412398	15.7689	3.97901	up
pme3705	C6H10O7	D-Glucoronic acid*	Others	Saccharides	6556-12-3	1	2.00531e+06	173266	1.14521e+06	6.93386e+06	5.0234e+06	5.96669e+06	1.05757	0.00313777	0.024537	5.39263	2.43099	up
Lmmn005092	C47H72O20	Medicagenic acid-3-O-glucuronide-28-O-rhamnosyl(1,2)-arabinoside	Terpenoids	Triterpene Saponin	-	2	110257	19769.4	81762.1	9.35423e+06	8.69815e+06	8.32399e+06	1.27385	0.00110116	0.0138786	124.541	6.96048	up
Laxp006572	C15H10O4	Hispidol	Flavonoids	Other Flavonoids	5786-54-9	1	269099	373396	290202	1.63231e+07	1.9799e+07	1.78212e+07	1.30002	0.00320394	0.0246596	57.836	5.85389	up
Lcsn006335	C14H28O3	2-Hydroxymyristic acid	Organic acids	Organic acids	2507-55-3	1	2.50293e+06	1.57909e+06	1.76397e+06	1.36559e+07	1.6884e+07	1.20231e+07	1.28541	0.0110085	0.0449889	7.28073	2.86408	up
Lmdn007639	C15H12O4	3,9-Dihydroxypterocarpan	Flavonoids	Isoflavones	61135-91-9	1	259480	228644	196914	2.78667e+06	3.71476e+06	3.53637e+06	1.29629	0.00801866	0.0381471	14.6529	3.87311	up
Lmqn009304	C19H18O5	Eucalyptin (5-Hydroxy-7,4'-dimethoxy-6,8-dimethylflavone)	Flavonoids	Flavanones	3122-88-1	3	2.49444e+06	728064	2.34352e+06	3.50359e+07	3.77776e+07	3.16139e+07	1.2588	0.00135593	0.0151291	18.7615	4.22971	up
Hahn002259	C37H50O21	kurroaoside C	Others	Others	-	2	9	9	9	42327.6	22277.3	27591.6	1.30116	0.0360559	0.0920942	3414.69	11.7375	up
Wasn002329	C16H17NO9	Xanthurenic Acid 8-O-Glucoside	Alkaloids	Quinoline alkaloids	97451-32-6	2	16556.5	9486.39	4174.18	40444.6	76345.4	50180.8	1.17414	0.0399365	0.097622	5.52572	2.46616	up
mws1405	C15H8O5	Coumestrol	Lignans and Coumarins	Coumarins	479-13-0	2	93012	82504	31694.6	3.33155e+06	3.47154e+06	3.19481e+06	1.28477	0.000323229	0.00825823	48.25	5.59246	up
mws1178	C16H16O4	Vestitol	Flavonoids	Other Flavonoids	35878-41-2	1	31877.9	27710.7	31911.5	1.23055e+06	1.81712e+06	1.71477e+06	1.29812	0.0132271	0.0506316	52.0484	5.70178	up
Wmmn002441	C10H16O3	(E)-Linalool-1-oic acid	Lipids	Free fatty acids	-	3	395555	125987	180343	1.27814e+06	1.29569e+06	1.3351e+06	1.22176	0.00447311	0.0286581	5.56918	2.47746	up
MWSmce230	C8H8O5	Methyl gallate	Phenolic acids	Phenolic acids	99-24-1	2	395555	125987	180343	1.27814e+06	1.29569e+06	1.3351e+06	1.22176	0.00447311	0.0286581	5.56918	2.47746	up
mws1177	C16H12O5	Maackiain	Flavonoids	Isoflavones	2035-15-6	2	4547.76	6455.37	6869.52	235805	304550	207261	1.29734	0.0137559	0.0513955	41.8301	5.38647	up
Zbqp002414	C11H20N2O5	h-gamma-Glu-leu-oh	Amino acids and derivatives	Amino acids and derivatives	-	1	85787.5	48226.1	126456	1.01383e+06	837509	854941	1.26617	0.00167715	0.0171259	10.39	3.37712	up
mws0902	C15H12O4	Liquiritigenin	Flavonoids	Flavanones	578-86-9	1	964864	782068	927676	1.61067e+07	1.95658e+07	1.96219e+07	1.2987	0.00429146	0.0279126	20.6738	4.36973	up
Wcsn008935	C20H28O4	2-hydroxy-3-(4,8,12-trimethyl-10-oxotrideca-3,7,11-trienyl)-2H-furan-5-one	Others	Others	-	3	1.70396e+06	836520	1.6079e+06	7.7338e+06	8.25296e+06	7.22898e+06	1.25961	9.8372e-05	0.00493785	5.59634	2.48448	up
MWS20169	C15H10O5	2,5-dihydroxy-1-methoxy-anthraquinone	Quinones	Anthraquinone	-	3	21845.1	41384	21866.2	1.38311e+06	1.88147e+06	1.65615e+06	1.29391	0.00779815	0.0378276	57.8262	5.85365	up
pme3440	C15H12O5	Butein	Flavonoids	Chalcones	487-52-5	3	90035	35231.6	101710	1.29724e+06	2.40641e+06	2.98828e+06	1.26061	0.0488858	0.112147	29.4829	4.88181	up
Sadn007155	C17H18O3	4-(hydroxymethyl)-1,8-dimethyl-9,10-dihydrophenanthrene-2,7-diol	Terpenoids	Ditepenoids	-	2	64559.9	48777.4	41826.7	2.16095e+06	2.12444e+06	2.03925e+06	1.29961	0.000199517	0.00667658	40.761	5.34912	up
HX1332	C19H30O2	Roupelliol(ISO1)	Others	Others	-	3	2.57602e+06	1.88356e+06	2.32681e+06	2.0977e+07	1.78462e+07	1.6928e+07	1.29596	0.00466035	0.0292401	8.21516	3.03829	up
Lajn006059	C18H20O6	7,4'-Dihydroxy-8,2',3'-trimethoxyisoflavan	Flavonoids	Other Flavonoids	-	2	12601.1	20108	15995.9	2.57937e+06	2.38712e+06	1.91848e+06	1.30033	0.00733088	0.0365594	141.361	7.14324	up
mws0058	C16H12O6	Diosmetin (5,7,3'-Trihydroxy-4'-methoxyflavone)*	Flavonoids	Flavones	520-34-3	1	724399	712156	655208	8.47123e+06	9.05227e+06	7.98505e+06	1.30187	0.00149054	0.0160352	12.1948	3.60819	up
mws0059	C27H30O16	Quercetin-3-O-rutinoside (Rutin)	Flavonoids	Flavonols	153-18-4	2	1.63889e+06	865121	1.47842e+06	7.17494e+06	8.36225e+06	1.00451e+07	1.26444	0.00893205	0.0402814	6.42378	2.68342	up
Wbtn007603	C16H12O6	9,11-dimethoxy-2h-[1,3]dioxolo[4,5-b]xanthen-10-one	Flavonoids	Other Flavonoids	-	1	888784	759620	679425	8.71353e+06	8.83367e+06	8.84211e+06	1.29967	2.40981e-07	0.000304372	11.3364	3.5029	up
Zmjp011129	C30H48O4	1,3-Dihydroxyurs-12-en-28-oic acid (Kaneric acid)	Terpenoids	Triterpene	107693-87-8	2	65910.6	64159.9	81797.5	304147	476263	416106	1.27928	0.0216984	0.0677375	5.64745	2.4976	up
Lmtn002796	C21H22O11	Aromadendrin-7-O-glucoside	Flavonoids	Flavanonols	28189-90-4	2	9	9	9	77590.9	122603	161261	1.29957	0.0379912	0.0948969	13387.2	13.7086	up
Lmtn002916	C22H20O14	Mearnsetin-3-O-glucuronide	Flavonoids	Flavones	-	3	12814.9	22247.2	25974.5	1.65434e+06	705992	1.31511e+06	1.28445	0.0491238	0.112304	60.217	5.9121	up
pmn001706	C30H48O4	2,3-Dihydroxyolean-12-en-28-oic acid (2-Hydroxyoleanolic acid)*	Terpenoids	Triterpene	26707-60-8	2	86880.6	64125.4	57071.7	1.31082e+07	1.6016e+07	1.24495e+07	1.30068	0.00625234	0.0335736	199.799	7.64241	up
Lmzn206284	C30H48O4	3,13-Dihydroxylup-20(29)-en-28-oic acid (Terminic acid)	Terpenoids	Triterpene	-	2	86880.6	64125.4	57071.7	1.31082e+07	1.6016e+07	1.24495e+07	1.30068	0.00625234	0.0335736	199.799	7.64241	up
pme3250	C16H12O5	Biochanin A	Flavonoids	Isoflavones	491-80-5	1	20466.8	29376.5	12781.1	256979	230490	398222	1.26995	0.0332352	0.0871057	14.1429	3.822	up
Wbtn002952	C13H19NO7	1-(β-D-Glucopyranosyl)-3-ethyl-4-methyl-1H-pyrrole-2,5-dione	Others	Ketone compounds	-	2	5.22528e+06	4.11998e+06	4.93065e+06	836080	675778	1.09481e+06	1.28454	0.00328578	0.0249617	0.182592	-2.45331	down
Sayn008823	C30H22O8	pauferrol C	Terpenoids	Ditepenoids	-	2	31451.5	23971.5	23624.6	731405	813075	966291	1.29764	0.00707526	0.0360635	31.7628	4.98926	up
pmb1466	C26H22O11	Tricin-4'-O-syringic acid	Flavonoids	Flavones	-	3	45151.5	7708.08	16751.6	187815	190023	101347	1.16224	0.0300874	0.0826074	6.88374	2.78319	up
pmn001583	C27H30O16	Quercetin-3-O-robinobioside	Flavonoids	Flavonols	52525-35-6	2	1.91102e+06	932264	1.73186e+06	8.49628e+06	10612825	1.20286e+07	1.25916	0.00875476	0.0399501	6.80585	2.76677	up
Zbln008072	C16H12O4	2-acetyl-7-methoxy-3H-benzo[f]chromen-3-one	Lignans and Coumarins	Coumarins	-	1	22787.7	27238.5	26489.6	1.71548e+06	2.0122e+06	1.92163e+06	1.30096	0.00222163	0.0201167	73.832	6.20617	up
Lacp005409	C17H14O5	MelimesSanol C	Lignans and Coumarins	Coumarins	-	1	197457	174791	170407	2.47294e+07	3.4516e+07	2.66396e+07	1.30098	0.0109031	0.0448033	158.268	7.30623	up
Lkmn122710	C15H22O7S	9-(hydroxymethyl)-3,5a-dimethyl-2-oxo-2,3,3a,4,5,5a,6,7,9a,9b-decahydronaphtho[1,2-b]furan-6-yl hydrogen sulfate	Terpenoids	Sesquiterpenoids	-	2	9	9	9	1.58854e+06	1.80197e+06	1.04051e+06	1.30225	0.0227728	0.06937	164112	17.3243	up
Smpn009230	C30H48O5	2,3,23-Trihydroxyolean-12-en-28-oic acid*	Terpenoids	Triterpene	-	3	1.68238e+06	1.32959e+06	1.4343e+06	4.74969e+07	5.4064e+07	3.96543e+07	1.30045	0.00821264	0.0383866	31.7604	4.98916	up
Wbmn009702	C30H48O5	2,3,23-Trihydroxyurs-12-en-28-oic acid*	Terpenoids	Triterpene	-	3	1.68238e+06	1.32959e+06	1.4343e+06	4.74969e+07	5.4064e+07	3.96543e+07	1.30045	0.00821264	0.0383866	31.7604	4.98916	up
pme2289	C20H30O	Retinol (Vitamin A1)	Others	Vitamin	68-26-8	3	51890.2	32280	44617	244595	171174	254734	1.26749	0.0169976	0.0588419	5.20628	2.38025	up
mws5038	C12H22O11	Isomaltulose*	Others	Saccharides	13718-94-0	1	9	9	9	9103.9	13860.3	6502.6	1.30069	0.0449615	0.105611	1091.36	10.0919	up
Lamp007647	C15H12O4	2',4,4'-Trihydroxychalcone*	Flavonoids	Chalcones	-	1	1.58416e+06	1.44328e+06	1.11737e+06	2.01403e+07	2.82034e+07	2.56281e+07	1.29518	0.0100829	0.0429672	17.8468	4.1576	up
mws0612	C10H12O4	3,4-Dimethoxyphenyl acetic acid	Phenolic acids	Phenolic acids	93-40-3	2	1.90695e+06	1.67194e+06	2.28323e+06	2.37683e+07	2.27003e+07	2.19726e+07	1.2983	0.000182561	0.00638685	11.6752	3.54537	up
Yalp008047	C19H30O2	Methyl 12-phenyldodecanoate	Lipids	Free fatty acids	38795-65-2	1	2.87386e+06	2.04964e+06	2.53563e+06	2.31006e+07	1.90552e+07	1.81572e+07	1.29458	0.00632604	0.0338024	8.0858	3.01539	up
Zmhn003257	C16H12O6	5,7,2'-Trihydroxy-8-methoxyflavone*	Flavonoids	Flavones	-	1	848168	845375	762427	9.04772e+06	8.7172e+06	8.44591e+06	1.30196	0.00035688	0.00866081	10.6723	3.4158	up
Zmdn007764	C15H10O5	isoemodin	Quinones	Anthraquinone	-	1	135465	743156	124445	8.87113e+06	7.88377e+06	8.03365e+06	1.23937	7.96786e-05	0.00471081	24.7128	4.62718	up
Lsjp211254	C30H46O	Lupa-1,20(29)-dien-3-one (Glochidone)	Terpenoids	Triterpene	-	1	738648	315350	148296	8.96316e+06	8.35647e+06	8.53601e+06	1.25451	5.25826e-06	0.00202355	21.5052	4.42662	up
Lmmp004504	C15H10O6	2'-Hydroxygenistein	Flavonoids	Isoflavones	1156-78-1	1	620455	655802	469650	2.32753e+07	2.37225e+07	2.05279e+07	1.30067	0.00200995	0.0187588	38.6765	5.27339	up
mws0474	C12H22O4	Dodecanedioic aicd	Lipids	Free fatty acids	693-23-2	1	254945	355097	231220	1.54828e+06	1.61766e+06	1.47507e+06	1.2884	2.38693e-05	0.00329496	5.51672	2.46381	up
Lmmn003663	C14H18O9	5-Glucosyloxy-2-Hydroxybenzoic acid methyl ester	Phenolic acids	Phenolic acids	-	3	7.76148e+06	5.03409e+06	6.8929e+06	522002	388237	877834	1.27578	0.0152979	0.055539	0.0908183	-3.46087	down
pmb3023	C21H22O11	Eriodictyol-8-C-glucoside	Flavonoids	Flavanones	1023271-51-3	3	15119.4	30081.7	25966.6	143178	209909	265791	1.25744	0.0339305	0.0881278	8.69605	3.12036	up
Lmhn005110	C16H12O6	Aracarpene 1	Flavonoids	Isoflavones	1261245-78-6	2	616966	659754	602882	9.25862e+06	8.59751e+06	9.1092e+06	1.30166	0.000527265	0.0096975	14.3463	3.84261	up
HJAP140	C17H14O5	Puerol A	Phenolic acids	Phenolic acids	152784-32-2	1	146728	203835	192203	2.7518e+07	3.5883e+07	2.79164e+07	1.30045	0.00800731	0.0381471	168.244	7.39442	up
pmp000106	C18H16O5	5,7,4'-Trimethoxyflavone	Flavonoids	Flavones	5631-70-9	2	167685	164552	141139	1.88271e+06	2.70824e+06	1.7745e+06	1.29566	0.0217335	0.0677375	13.4469	3.7492	up
ZbLn005207	C12H22O9S	Sulfatricalysine C	Others	Saccharides	-	1	243773	383601	348781	1.64842e+07	1.49305e+07	1.6111e+07	1.29848	0.000836674	0.012163	48.6867	5.60546	up
MWSmce116	C10H13N5O3	5'-Deoxyadenosine*	Nucleotides and derivatives	Nucleotides and derivatives	4754-39-6	2	1.5242e+06	1.40377e+06	1.63038e+06	1.10407e+07	9.1422e+06	9.83557e+06	1.29873	0.00383529	0.0263923	6.58539	2.71927	up
mws0566	C7H8O2	4-Methylcatechol	Phenolic acids	Phenolic acids	452-86-8	3	13340	25876.1	47040.5	216076	197580	194247	1.22693	0.000270337	0.00780669	7.04761	2.81714	up
Zmdn008530	C30H22O8	Emodin bianthrone*	Quinones	Anthraquinone	-	1	2170.48	83487.5	2372.5	3.47635e+06	3.12059e+06	2.19992e+06	1.20868	0.0163458	0.0577987	99.9297	6.64284	up
MWSslk117	C9H6O3	7-Hydroxy-4-chromone	Others	Chromone	59887-89-7	1	98087.9	120300	153231	1.08171e+06	1.40471e+06	1.40393e+06	1.28875	0.00727941	0.0365395	10.4687	3.38801	up
HJN098	C42H68O13	Azukisaponin I	Terpenoids	Triterpene Saponin	82793-02-0	2	786524	657454	593308	7.81303e+06	8.83038e+06	6.30982e+06	1.29707	0.0104965	0.0437476	11.2666	3.49398	up
Zmdn005541	C21H20O10	Emodin-6-O-glucoside	Quinones	Anthraquinone	-	1	11320.9	13442.9	24952.4	609626	485653	573894	1.28849	0.00421106	0.0277329	33.5741	5.06928	up
Lmyn006227	C15H10O5	Galangin (3,5,7-Trihydroxyflavone)	Flavonoids	Flavones	548-83-4	3	49636.8	54371.8	45696.9	2.10617e+06	2.10158e+06	2.02883e+06	1.30191	0.000132543	0.00589934	41.659	5.38056	up
mws0038	C17H14O6	5,4'-Dihydroxy-3,7-dimethoxyflavone(Kumatakenin)	Flavonoids	Flavonols	3301-49-3	1	91499.4	69975.2	52282.7	498143	485633	453079	1.28551	2.56955e-05	0.00329496	6.7219	2.74887	up
MWS20151	C15H10O5	Apigenin; 4',5,7-Trihydroxyflavone	Flavonoids	Flavones	520-36-5	1	15020.6	23161.5	22723.1	788898	931974	884327	1.29743	0.00237079	0.0204448	42.7747	5.41869	up
Wbtn006721	C15H10O6	6,8-dihydroxy-3-methyl-9-oxoxanthene-1-carboxylic acid	Others	Ketone compounds	-	1	74788.8	35453.8	56871.7	2.87419e+06	2.83838e+06	2.39247e+06	1.29415	0.00327252	0.0249617	48.5	5.59991	up
MWS3166	C18H35NO3	N-Palmitoylglycine	Amino acids and derivatives	Amino acids and derivatives	2441-41-0	2	186405	231763	175510	1.04111e+06	1.12658e+06	847285	1.29126	0.00815671	0.0383582	5.07845	2.34439	up
NK10256198	C15H10O6	3,5,7,2'-Tetrahydroxyflavone; Datiscetin	Flavonoids	Flavones	480-15-9	2	39525.5	440007	54211.2	5.76541e+06	5.06066e+06	4.65677e+06	1.21779	0.0014331	0.0156825	29.008	4.85838	up
MWSHY0103	C25H22O10	Silibinin	Flavonoids	Flavanonols	22888-70-6	3	16930.3	57671.3	37560.1	421341	398692	534678	1.25035	0.00671942	0.0351881	12.0782	3.59433	up
Lmdp005525	C17H14O5	Afrormosin (6,4'-Dimethoxy-7-Hydroxyisoflavone)	Flavonoids	Isoflavones	550-79-8	2	226793	157257	216947	2.69473e+07	3.30473e+07	2.60617e+07	1.30026	0.00588629	0.0324378	143.189	7.16178	up
Lmsn010604	C30H46O6	2,3,19-Trihydroxyurs-12-en-23-formyl-28-oic Acid	Terpenoids	Triterpene	-	2	3941.73	6587.46	2550.27	81821.5	128069	73081.4	1.27751	0.0335935	0.0876621	21.6349	4.43529	up
Smpn011792	C30H48O4	2,3-Dihydroxy-12-ursen-28-oic acid	Terpenoids	Triterpene	-	3	105772	97448.9	72946.6	1.3402e+07	1.53427e+07	1.25681e+07	1.30109	0.00358721	0.0253299	149.593	7.2249	up
Hmjn003948	C30H48O5	2,3,6-Trihydroxyurs-12-en-28-oic acid (Madasiatic acid)*	Terpenoids	Triterpene	26532-66-1	3	18444.4	24103	12682.3	1.96561e+06	2.04036e+06	1.59236e+06	1.29861	0.00555555	0.0312652	101.364	6.66341	up
MWSHY0032	C16H12O4	Formononetin (7-Hydroxy-4'-methoxyisoflavone)	Flavonoids	Isoflavones	485-72-3	1	217849	285962	259318	1.01822e+07	1.43951e+07	1.07676e+07	1.2991	0.0128001	0.0493411	46.3158	5.53343	up
Lmzn006284	C30H48O4	2-Hydroxyursolic acid*	Terpenoids	Triterpene	-	2	26715.7	17039.1	26398.9	3.98919e+06	4.24806e+06	3.65936e+06	1.29986	0.00185642	0.0175675	169.579	7.40582	up
Wayn004064	C21H16O14	3'-O-Methylellagic acid-4-O-glucuronide	Tannins	Tannin	-	2	28281.1	26675	37579.2	464321	281272	433878	1.2865	0.0232327	0.069964	12.7462	3.67199	up
Wcfn006909	C17H14O7	(2Z)-4,6-Dihydroxy-2-[(4-Hydroxy-3,5-Dimethoxyphenyl)Methylidene]-1-Benzofuran-3-One	Others	Others	-	3	304986	274570	229370	3.28905e+06	3.19329e+06	3.20308e+06	1.2997	5.11159e-07	0.000393422	11.9732	3.58174	up
Lasp008336	C26H22O8	Butesuperin A	Flavonoids	Isoflavones	-	1	45850.1	25894.1	30729	750562	849757	812379	1.29432	0.000940648	0.0130841	23.5447	4.55733	up
mws0715	C13H16N2O4	Phenylacetyl-L-glutamine	Amino acids and derivatives	Amino acids and derivatives	28047-15-6	3	97853.6	102776	127851	1.41153e+06	1.4674e+06	1.58368e+06	1.29786	0.000983555	0.0133024	13.5856	3.76401	up
Wmzn006169	C30H48O4	3,16-Dihydroxyolean-12-en-28-oic acid (Echinocystic acid)	Terpenoids	Triterpene	510-30-5	3	7908.95	5377.86	7795.63	3.35637e+06	4.01287e+06	3.40422e+06	1.30072	0.00345752	0.0251843	511.016	8.99722	up
Wmhn007355	C15H10O6	Citreorosein	Quinones	Anthraquinone	481-73-2	1	74166.4	803150	35891.7	7.86706e+06	8.89936e+06	6.05417e+06	1.18412	0.00825288	0.0384621	24.9895	4.64325	up
pmp000344	C15H10O5	3',4',7-Trihydroxyflavone	Flavonoids	Flavones	2150-11-0	1	462936	470563	442840	1.29185e+07	1.19884e+07	1.24229e+07	1.30203	0.000496887	0.00959815	27.1225	4.76142	up
Wagp008369	C20H20O9	5,3'-Dihydroxy-3,6,7,4',5'-Pentamethoxyflavone*	Flavonoids	Flavones	-	2	18498.2	9970.98	9768.57	601559	695060	1.03798e+06	1.28956	0.0287003	0.0802395	61.0549	5.93203	up
Lmhp005784	C24H28N2O5	p-Coumaroylferuloylcadaverine	Alkaloids	Phenolamine	-	3	50150.9	33630.6	43170.7	667582	761812	652234	1.2971	0.00234944	0.0204448	16.3969	4.03536	up
Zblp004832	C15H12O4	7,4'-Dihydroxydihydroflavonoids	Flavonoids	Flavanones	-	1	348441	281740	241576	8.20921e+06	1.15851e+07	9.84826e+06	1.29759	0.0101137	0.0430065	34.0033	5.0876	up
pme0088	C15H10O6	Luteolin (5,7,3',4'-Tetrahydroxyflavone)	Flavonoids	Flavones	491-70-3	2	127682	102192	145283	3.48524e+06	3.55188e+06	3.13426e+06	1.29942	0.00143996	0.0156834	27.1124	4.76088	up
pmn001708	C30H48O5	2,3,23-Trihydroxyurs-12-en-28-oic acid (Asiatic acid)	Terpenoids	Triterpene	464-92-6	3	9478.88	6893.08	5517.56	36245.9	51263.3	36176.9	1.27271	0.017096	0.0590939	5.65046	2.49837	up
Zbqn004234	C12H13NO5	N-(malonyl)phenylalanine	Amino acids and derivatives	Amino acids and derivatives	-	1	9	9	9	411537	397735	369507	1.30219	0.000989515	0.0133024	43658.5	15.414	up
MWS2910	C10H15N3O4	5-Methyl-2'-Deoxycytidine	Nucleotides and derivatives	Nucleotides and derivatives	838-07-3	3	91826	258420	157599	2.50063e+06	2.16711e+06	2.13109e+06	1.27077	0.000940521	0.0130841	13.3876	3.74283	up
Lmsn003588	C17H14O5	Pterocarpine	Flavonoids	Isoflavones	524-97-0	3	249612	257153	247283	2.74723e+07	3.33145e+07	3.20275e+07	1.30131	0.00331886	0.0249617	123.088	6.94355	up
Zmmp002946	C14H18N2O5	(3-(carboxyamino)-2-methylpropanoyl)phenylalanine	Amino acids and derivatives	Amino acids and derivatives	-	1	902344	99712.1	742825	5.48903e+06	4.5065e+06	6.23526e+06	1.13775	0.0036454	0.0256605	9.30195	3.21753	up
Sayn009123	C30H22O8	pauferrol B	Terpenoids	Ditepenoids	-	2	48712	32297	36831.8	1.43443e+06	1.65844e+06	1.78749e+06	1.29775	0.00412577	0.0277329	41.4149	5.37208	up
pme0368	C27H30O14	Apigenin-7-O-rutinoside (Isorhoifolin)*	Flavonoids	Flavones	552-57-8	3	10005	31675	17922.4	216431	172244	168440	1.25101	0.00354243	0.0252622	9.34719	3.22453	up
mws0048	C21H20O10	Apigenin-8-C-Glucoside (Vitexin)*	Flavonoids	Flavones	3681-93-4	1	803400	606930	659139	1.50219e+07	7.44837e+06	1.27796e+07	1.28487	0.0387718	0.0956454	17.0333	4.09028	up
Zbdp007428	C17H12O6	3-Methoxy-7-hydroxy-3',4'-methylenedioxyflavone	Flavonoids	Other Flavonoids	-	2	27060.1	55015	35290.3	1.48672e+06	1.75766e+06	1.27632e+06	1.29349	0.0087064	0.0398081	38.5181	5.26747	up
pme0026	C6H14N2O2	L-Lysine	Amino acids and derivatives	Amino acids and derivatives	56-87-1	1	142040	20552.5	138882	710930	647679	664163	1.12417	0.00126337	0.0148175	6.70962	2.74623	up
Hmlp005443	C15H10O4	6,7-Dihydroxyflavone	Flavonoids	Flavones	38183-04-9	1	366923	413726	352934	1.68335e+07	2.07301e+07	1.83989e+07	1.30105	0.0038072	0.0263923	49.3678	5.6255	up
Wbtn007637	C16H14O6	1-hydroxy-3,6,7-trimethoxyxanthen-9-one	Flavonoids	Other Flavonoids	-	2	19560.6	18700.1	33945.2	378381	344384	377453	1.28814	0.000182521	0.00638685	15.2372	3.92953	up
Lhmp122202	C16H12O5	stevenin	Lignans and Coumarins	Coumarins	36286-69-8	2	140836	168465	98685.8	1.20441e+07	1.2131e+07	1.22853e+07	1.29934	8.79432e-06	0.00225623	89.3667	6.48167	up
Zmdn001564	C14H18N2O5	γ-Glutamylphenylalanine	Amino acids and derivatives	Amino acids and derivatives	7432-24-8	1	103999	30388.2	93007.5	598282	580725	659343	1.22471	8.49615e-05	0.00478479	8.08441	3.01514	up
Lmtn002565	C14H18O9	1-O-Vanilloyl-D-Glucose	Phenolic acids	Phenolic acids	-	3	8.45136e+06	5.13327e+06	6.59078e+06	457675	398586	743034	1.28385	0.0221064	0.0680583	0.0792695	-3.65709	down
MWS1882	C4H7NO4	Iminodiacetic acid	Organic acids	Organic acids	142-73-4	3	185150	36447.8	178682	1.18565e+06	1.14705e+06	1.17123e+06	1.1868	0.00139477	0.0153359	8.75371	3.12989	up
Lmmp005689	C16H12O6	Cajanin	Flavonoids	Isoflavones	32884-36-9	1	40751.6	68208.7	73557.4	2.25481e+06	2.05535e+06	2.13521e+06	1.29473	0.000555961	0.00987471	35.3137	5.14216	up
pme2566	C8H14N2O5	5-L-Glutamyl-L-amino acid	Amino acids and derivatives	Amino acids and derivatives	5875-41-2	3	126284	77451.8	171283	700879	743536	582583	1.25432	0.00173786	0.0173434	5.40506	2.43431	up
Lmtn002997	C22H22O13	Mearnsetin-3-O-glucoside	Flavonoids	Flavones	-	2	132172	105954	204400	38871.6	13340	33404.2	1.18914	0.0481893	0.111158	0.19347	-2.36982	down
Lmmp004600	C40H40O23	Tricin-7-O-[(2''-Sinapoyl)glucuronyl](2→1)glucuronide	Flavonoids	Flavones	-	2	30633	10005	42624.2	17336030	12412135	8.80917e+06	1.28792	0.0351835	0.090165	463.083	8.85513	up
Lakn002786	C17H22O12	Protocatechuic acid xylosyl xyloside	Phenolic acids	Phenolic acids	-	1	205102	57222.1	114477	1.71544e+06	1.3832e+06	1.98565e+06	1.25157	0.00890625	0.0402814	13.4933	3.75417	up
Qmxp101615	C22H36O3	Ent-3β-Acetoxyisopimar-15-8β-ol	Terpenoids	Ditepenoids	-	1	5.83518e+06	5.26861e+06	5.68718e+06	3.7181e+07	3.18049e+07	2.61723e+07	1.29543	0.0142804	0.0526733	5.66723	2.50264	up
mws1173	C15H12O5	Garbanzol	Flavonoids	Flavonols	1226-22-8	3	177878	183929	124604	911743	1.02134e+06	913428	1.28974	0.000301456	0.00809373	5.85208	2.54895	up
Lalp005180	C14H8O5	1,4,5-trihydroxyanthraquinone	Quinones	Anthraquinone	-	2	193094	201815	118013	4.39321e+06	3.68618e+06	3.05e+06	1.29379	0.0115136	0.0461544	21.698	4.43949	up
Lakn005184	C24H34O12	1'S,4'S-4'-Dihydroabscisic acid-4′-O-β-malonylglucopyranoside	Terpenoids	Sesquiterpenoids	-	1	47485.3	97883.8	75975.8	1.80189e+06	2.00642e+06	1.86846e+06	1.29099	0.000617695	0.0101978	25.6467	4.6807	up
Zblp005270	C16H14O4	4,4'-Dihydroxy-2-methoxychalcone; Echinatin	Flavonoids	Chalcones	34221-41-5	1	31305.4	55015	76280	254192	327053	445651	1.23192	0.0301236	0.0826074	6.31546	2.65889	up
Zbn004415	C26H28O16	5,6-Dihydroxylucidin-3β-primeveroside	Quinones	Anthraquinone	-	1	927448	249242	802133	3.71998e+06	2.70527e+06	3.83745e+06	1.1693	0.00561229	0.0313935	5.18626	2.3747	up
MWS20182	C10H12O4	Dihydroferulic Acid	Phenolic acids	Phenolic acids	1135-23-5	2	361636	288783	424622	4.69235e+06	4.13053e+06	4.5906e+06	1.2957	0.00111583	0.0138786	12.4772	3.64122	up
mws4085	C11H12O5	Sinapic acid	Phenolic acids	Phenolic acids	530-59-6	1	768858	248254	607278	4.85991e+06	4.03506e+06	6.78852e+06	1.23618	0.0256235	0.0748666	9.655	3.27128	up
Lajp006981	C17H12O7	5,6-Dihydroxy-7-methoxy-3′,4′-dioxymethylene-flavonoid	Flavonoids	Flavones	-	2	17476.4	31899	30319.5	338291	425996	332198	1.28639	0.00688955	0.0353511	13.7585	3.78225	up
mws0145	C8H8O3	O-Anisic acid (2-Methoxybenzoic acid)	Phenolic acids	Phenolic acids	529-75-9	3	17995	27745.5	24381	239033	246980	265017	1.29332	0.000319332	0.00825823	10.7104	3.42094	up
Zmgp006231	C16H10O5	pseudobaptigenin	Flavonoids	Isoflavones	90-29-9	1	158395	155204	184233	9.18283e+06	1.25663e+07	1.04694e+07	1.30002	0.00857968	0.0394286	64.7175	6.01608	up
Ymjm000099	C30H44O3	3-Oxooleana-11,13(18)-dien-28-oic acid	Terpenoids	Triterpene	-	2	26560	63920	75576.5	5.39533e+06	5.38699e+06	5.06363e+06	1.28916	0.000351516	0.00863457	95.4251	6.5763	up
Zbdp006427	C16H12O5	7,8-Dihydroxy-4'-methoxyisoflavone	Flavonoids	Other Flavonoids	-	1	518100	1.23462e+06	404187	3.81571e+06	4.11183e+06	3.44777e+06	1.21848	0.00100911	0.0133145	5.2739	2.39887	up
MWS0631	C3H7NO5S2	S-Sulfo-L-Cysteine	Amino acids and derivatives	Amino acids and derivatives	1637-71-4	3	6014	1486.97	9139.51	156644	183367	170740	1.24523	0.0011037	0.0138786	30.6933	4.93985	up
pmb0725	C33H32O15	Tricin-7-O-(2''-feruloyl)glucoside	Flavonoids	Flavones	-	3	19836.6	6327.16	14927	508527	308866	377499	1.27299	0.0220019	0.0679567	29.0794	4.86192	up
pmp000661	C15H22O	Cryptomerione	Terpenoids	Sesquiterpenoids	5988-72-7	2	4.23683e+06	5.17731e+06	5.30665e+06	775451	936749	904152	1.29607	0.00604217	0.0328267	0.177732	-2.49223	down
pme1228	C11H12N2O3	5-Hydroxy-L-tryptophan	Amino acids and derivatives	Amino acids and derivatives	4350-09-8	3	256194	139105	296009	2.15337e+06	2.20884e+06	2.22143e+06	1.27526	7.72356e-05	0.00471081	9.52345	3.25148	up
MWSmce085	C16H10O7	Wedelolactone	Lignans and Coumarins	Coumarins	524-12-9	3	63129.6	89494.3	178553	4.56271e+06	5.30911e+06	4.56233e+06	1.2848	0.00238021	0.0204448	43.5844	5.44574	up
MWSHY0069	C16H12O6	Hispidulin (5,7,4'-Trihydroxy-6-methoxyflavone)	Flavonoids	Flavones	1447-88-7	3	523062	553207	581029	5.2623e+06	5.15178e+06	4.89087e+06	1.30169	0.000452142	0.00923891	9.23488	3.20709	up
Zbfn008708	C26H46O9	1-O-Linoleoyl-(6-O-Hydroxyethyl-D-Glucose)	Lipids	Free fatty acids	-	2	6559.47	11455.2	13556.9	64288.4	81326.5	80074	1.26618	0.00315972	0.024537	7.14849	2.83764	up
Wbtn007183	C16H12O7	methyl 4,8-dihydroxy-6-methoxy-9-oxo-9H-xanthene-3-carboxylate	Flavonoids	Other Flavonoids	-	3	262700	273756	256648	1.69299e+06	1.31683e+06	1.60557e+06	1.29672	0.0077708	0.0377743	5.81941	2.54087	up
MWSHY0146	C16H12O5	Glycitein	Flavonoids	Isoflavones	40957-83-3	2	102686	172079	148744	2.48774e+06	3.02844e+06	2.79099e+06	1.29384	0.0030982	0.0244155	19.6151	4.29389	up
pme0241	C7H6O2	Benzoic acid	Phenolic acids	Phenolic acids	65-85-0	3	2.30277e+06	6.27421e+06	2.97426e+06	2.54524e+07	2.73691e+07	2.76459e+07	1.24849	0.00037884	0.00866081	6.96612	2.80036	up
Wbjp001169	C11H12N2O3	o-Carboxy-5-hydroxytryptamine	Alkaloids	Alkaloids	-	3	1.39933e+06	479824	1.52355e+06	6.56694e+06	6.64969e+06	8.25709e+06	1.21033	0.00178257	0.0173955	6.31078	2.65782	up
mws0219	C4H7NO4	L-Aspartic Acid	Amino acids and derivatives	Amino acids and derivatives	56-84-8	1	1.48792e+06	265477	1.33437e+06	8.73715e+06	9.01928e+06	8.28921e+06	1.17722	0.000327581	0.00825823	8.43511	3.07641	up
pmf0443	C15H20O3	Parthenolide	Terpenoids	Sesquiterpenoids	20554-84-1	3	68421.6	60529.3	62303.9	409264	497680	348789	1.29548	0.0143063	0.0526847	6.56576	2.71496	up
Qmgp082708	C26H30O7	Obacunone(ISO)	Terpenoids	Ditepenoids	-	3	32546.1	13004.3	32909.4	848223	803196	1.00095e+06	1.28095	0.004437	0.0286581	33.8055	5.07919	up
Zmmp003443	C16H19N3O5	Bestim	Amino acids and derivatives	Amino acids and derivatives	66471-20-3	1	293662	55015	307740	1.40274e+06	972949	1.1085e+06	1.11298	0.00555881	0.0312652	5.3079	2.40814	up
Zmdp002216	C11H20N2O5	L-γ-Glutamyl-L-leucine	Amino acids and derivatives	Amino acids and derivatives	2566-39-4	1	707979	112271	660666	6.28269e+06	5.08609e+06	6.59855e+06	1.18968	0.00266915	0.0221693	12.1326	3.60081	up
Lmmp004510	C38H36O21	Apigenin-7-O-[2''-O-(2'''-Sinapoyl)glucuronyl]glucuronide	Flavonoids	Flavones	-	2	14941.6	10005	6670	5.3935e+06	3.46276e+06	4.79605e+06	1.29748	0.0154334	0.0557046	431.808	8.75425	up
Zmzp000145	C9H20N2O2	Trimethyllysine	Amino acids and derivatives	Amino acids and derivatives	23284-33-5	2	816201	109669	672041	6.74791e+06	6.54028e+06	6.26213e+06	1.184	6.58392e-05	0.00466522	12.2349	3.61293	up
pmp000567	C17H16O5	Melilotocarpan A	Phenolic acids	Phenolic acids	61135-95-3	2	220443	115878	105061	8.03683e+06	8.22574e+06	6.60528e+06	1.29398	0.00448229	0.0286581	51.8098	5.69515	up
Jmcn005419	C21H36O7	pterodontoside G	Terpenoids	Sesquiterpenoids	-	3	89920.9	58825.3	106516	1.19411e+06	1.12692e+06	1.18739e+06	1.28966	8.23404e-06	0.00225623	13.7444	3.78077	up
Hasp010605	C21H36O4	(S)-2,3-dihydroxypropyl (9Z,12Z,15Z)-octadeca-9,12,15-trienoate	Others	Others	129828-41-7	3	311053	268402	203536	1.54966e+06	1.22335e+06	1.2887e+06	1.28517	0.00473617	0.0292401	5.18743	2.37502	up
Ybhn010559	C29H46O4	3-Hydroxy-20-oxo-30-norlupan-28-oic acid (Platanic acid)	Terpenoids	Triterpene	6060-06-6	2	329448	98051.6	321902	1.91506e+06	2.02247e+06	1.79482e+06	1.22018	8.99149e-05	0.00482822	7.64925	2.93532	up
MWSmce693	C10H14O	Safranal	Terpenoids	Monoterpenoids	116-26-7	3	357560	307504	300057	1.66418e+06	1.82909e+06	1.65815e+06	1.29895	0.000646229	0.0104759	5.3376	2.41619	up
Walp004391	C15H16O7	7-C-Glucosylcoumarin	Lignans and Coumarins	Coumarins	-	3	74963.7	66685	121248	767715	947086	703440	1.28127	0.00756848	0.0371008	9.19842	3.20139	up
Laxp008689	C16H12O4	(2Z)-6-hydroxy-2-(3-methoxybenzylidene)-1-benzofuran-3(2H)-one	Flavonoids	Other Flavonoids	1234351-88-2	1	302354	274265	309406	1.03439e+07	1.36369e+07	1.17487e+07	1.30025	0.00667412	0.0351037	40.3256	5.33363	up
Laxp007582	C16H16O5	7,2'‑dihydroxy‑4'‑methoxy‑isoflavanol	Flavonoids	Other Flavonoids	-	1	335701	458330	387631	3.54648e+06	3.6432e+06	2.89541e+06	1.29643	0.00534499	0.0308877	8.53466	3.09333	up
Lacp004731	C15H10O4	3-Hydroxy-1-methoxy-9,10-anthraquinone	Quinones	Anthraquinone	28504-24-7	2	133932	102534	130912	968687	1.13102e+06	1.07951e+06	1.29603	0.00182573	0.0174199	8.65381	3.11333	up
Wbsp008647	C30H48O2	3α-hydroxy-14-serraten-21-one	Terpenoids	Triterpene	-	3	592159	616013	450632	1.15488e+07	1.3713e+07	1.12848e+07	1.29934	0.0042065	0.0277329	22.0319	4.46152	up
Lmln001951	C26H28O16	Quercetin-3-O-(6''-O-arabinosyl)glucoside	Flavonoids	Flavonols	-	3	948424	292164	718895	3.70471e+06	2.62585e+06	3.94835e+06	1.1934	0.00991848	0.0426476	5.24573	2.39114	up
Wbjp001317	C11H10N2O2	vasicinone	Alkaloids	Alkaloids	486-64-6	3	3.04159e+06	975000	3.38488e+06	2.04732e+07	1.99292e+07	2.23106e+07	1.22584	6.07303e-05	0.00466522	8.47304	3.08288	up
Smln006508	C16H10O7	Laccaic acid D	Quinones	Anthraquinone	18499-84-8	3	55233.9	109382	101159	1.11001e+06	852634	967148	1.27962	0.00507837	0.0301438	11.0236	3.46252	up
Lmhn001386	C12H12O9	Vnilloyltartaric acid	Phenolic acids	Phenolic acids	-	3	59112.2	30207.5	66423.2	386728	598246	686853	1.25879	0.0280967	0.0792128	10.7345	3.42419	up
Hmlp005624	C16H12O5	3',7-dihydroxy-4'-methoxyflavone	Flavonoids	Flavones	-	1	1163070	1.73526e+06	1.86428e+06	1.70462e+07	1.94765e+07	1.67445e+07	1.29161	0.00175011	0.0173434	11.1844	3.48342	up
Zmgp007333	C17H14O4	7,4'-Di-O-methyldaidzein	Flavonoids	Isoflavones	1157-39-7	1	25480.4	58739.4	30857	503616	492374	484642	1.2792	3.19103e-05	0.00329496	12.8665	3.68555	up
Lssp210422	C15H10O5	Genistein	Flavonoids	Isoflavones	446-72-0	1	19997.7	20416.5	12011.9	799452	956877	928242	1.2968	0.00295472	0.0235257	51.2067	5.67826	up
zjgp122007	C15H10O6	Maritimetin	Flavonoids	Aurones	576-02-3	3	563844	598589	491381	2.4056e+07	2.46561e+07	2.11346e+07	1.30189	0.0022655	0.0201971	42.2336	5.40032	up
mws0920	C15H10O7	Tricetin (5,7,3',4',5'-Pentahydroxyflavone)	Flavonoids	Flavones	520-31-0	2	9	9	9	149170	150770	132268	1.30223	0.00168367	0.0171259	16007.7	13.9665	up
pmb0496	C15H22N4O3	N-Feruloylagmatine	Alkaloids	Phenolamine	-	3	240552	148741	305242	3.67438e+06	3.22754e+06	3.51704e+06	1.28554	0.000574029	0.00996567	15.0013	3.90702	up
MWS201434	C12H20N4O3	Ile-His	Amino acids and derivatives	Amino acids and derivatives	97284-12-3	1	1.2773e+06	664546	1.35808e+06	6.69462e+06	6.03229e+06	7.0988e+06	1.25994	0.000257228	0.00771351	6.00791	2.58686	up
MWS1837	C8H15NO2	Tranexamic Acid	Organic acids	Organic acids	1197-18-8	3	448964	596269	462124	2.79457e+06	2.82351e+06	2.57499e+06	1.29533	8.16077e-05	0.00471081	5.43539	2.44238	up
Wcgp010223	C18H28O2	3-(Cyclohexen-1-yl)-2-hydroxy-4a,5-dimethyl-2,3,4,5,6,7,8,8a-octahydronaphthalen-1-one	Others	Others	-	3	324631	217582	308982	1.71723e+06	1.39674e+06	1.52667e+06	1.28509	0.00240326	0.0205499	5.45191	2.44676	up
Lmmp003767	C21H18O12	Kaempferol-7-O-glucuronide	Flavonoids	Flavonols	-	2	75553.2	51680	35371	1.68597e+06	1.96776e+06	1.73407e+06	1.29263	0.00214201	0.0195818	33.1344	5.05026	up
Zmdn004104	C12H10O5	2-methyl-5-carboxy methyl-7-Hydroxy-chromone	Others	Chromone	-	3	241285	264543	297371	2.97398e+06	2.60544e+06	2.57271e+06	1.29973	0.00241187	0.0205499	10.1496	3.34335	up
Lmmn005003	C52H80O24	Medicagenic acid-3-O-glucuronide-28-O-xylosyl(1,4)-rhamnosyl(1,2)-arabinoside	Terpenoids	Triterpene Saponin	128192-15-4	1	214939	153906	9	4.61838e+07	3.22852e+07	3.61464e+07	1.03872	0.0116097	0.0462986	310.734	8.27954	up
Zmhp003514	C16H12O6	6,7,8-Tetrahydroxy-5-methoxyflavone	Flavonoids	Flavones	-	3	534408	519407	449028	5.37521e+06	5.6251e+06	5.29987e+06	1.30112	0.000171425	0.00638685	10.8462	3.43912	up
Lamp006511	C17H16O6	Indigocarpan	Flavonoids	Other Flavonoids	-	2	13412.7	12064	47497.2	1.64017e+06	1.39949e+06	1.48156e+06	1.2744	0.00180058	0.0173955	61.9567	5.95319	up
Qayp009909	C20H32O2	Kolavenic Acid	Terpenoids	Ditepenoids	25436-90-2	2	51563.8	31440.2	63911.5	244495	271746	291746	1.26091	0.000375224	0.00866081	5.49967	2.45934	up
MWSslk252	C28H34O14	Didymin (Isosakuranetin-7-O-rutinoside)*	Flavonoids	Flavanones	14259-47-3	3	60834	67273.9	8490.12	1.8204e+06	1.69082e+06	1.62412e+06	1.23528	0.000450177	0.00923891	37.5946	5.23245	up
MW0120419	C9H6N2	4-Cyanoindole	Alkaloids	Plumerane	16136-52-0	3	622377	484563	622466	67492.2	49033.4	95588.1	1.28151	0.00498566	0.0298235	0.122651	-3.02737	down
MWSmce566	C17H16O5	Astrapterocarpan	Flavonoids	Other Flavonoids	73340-41-7	3	155152	285675	102748	5.425e+06	8.43292e+06	6.87375e+06	1.28327	0.0159559	0.0568551	38.1395	5.25321	up
pmp000416	C16H12O5	3'-Methoxydaidzein	Flavonoids	Isoflavones	21913-98-4	3	9914.14	8955.14	22570.7	180841	214335	204480	1.27088	0.000707191	0.0111082	14.4705	3.85504	up
pme0183	C5H5N5O	Isoguanine	Nucleotides and derivatives	Nucleotides and derivatives	3373-53-3	3	9	9	9	5.37405e+06	5.61901e+06	6.71535e+06	1.30169	0.00484524	0.0293437	655867	19.323	up
Zmsp002451	C11H15NO	5-Acetyl-2,3-dihydro-6,7-dimethyl-1H-pyrrolizine	Alkaloids	Pyrrole alkaloids	-	3	563037	649272	570923	7.93411e+06	7.57564e+06	7.92206e+06	1.30119	0.000132857	0.00589934	13.1401	3.7159	up
pme1611	C21H22O10	Isohemiphloin	Flavonoids	Flavanones	3682-02-8	3	48047.7	29078.5	61186.1	3.11572e+06	2.21412e+06	2.60382e+06	1.29282	0.00987248	0.042529	57.3605	5.84199	up
Wafn002171	C12H14O11S	Dihydroxybenzoyl(2'-sulfate)xyloside	Phenolic acids	Phenolic acids	-	2	203786	136211	159051	8.82232e+06	9.04006e+06	6.83649e+06	1.29961	0.00743145	0.0367078	49.492	5.62912	up
pme0193	C5H10N2O3	L-Glutamine	Amino acids and derivatives	Amino acids and derivatives	56-85-9	3	139700	19776.8	132277	586321	628334	551334	1.10946	0.00122017	0.0146939	6.05301	2.59765	up
Laxp010715	C30H48O2	Abrisapogenol F	Terpenoids	Triterpene Saponin	-	1	8930.54	11414	8723.17	134401	121340	123717	1.29945	0.000754164	0.0115587	13.0543	3.70645	up
Zbzp002318	C15H27NO4	heliocurassavicine	Alkaloids	Pyrrole alkaloids	82354-34-5	2	562525	447749	476193	56061.9	60919.8	52151.1	1.29746	0.00590557	0.0324666	0.113782	-3.13566	down
Lasp008178	C27H24O9	Butesuperin B	Flavonoids	Isoflavones	-	2	10858.7	21551.1	38095.3	306978	382285	488900	1.2548	0.0180188	0.0606458	16.7103	4.06267	up
Hmmn006338	C15H18O4	Armexifolin	Terpenoids	Sesquiterpenoids	64929-15-3	2	751820	408755	697147	32783.3	48712.7	73922.8	1.27086	0.0320508	0.0854564	0.083661	-3.5793	down
Zmdn007733	C30H22O8	Palmidin A	Quinones	Anthraquinone	-	2	538.92	6024.27	751.785	237548	158208	142789	1.24362	0.0260305	0.0756306	73.6222	6.20207	up
Zjgp101332	C42H64O16	24-hydroxyglucoglycyrrhizin	Terpenoids	Triterpene Saponin	-	1	3340	20005	6670	106143	85477.9	109025	1.20455	0.00100244	0.0133024	10.0165	3.32431	up
Hmbp002730	C15H10O6	Isoscutellarein	Flavonoids	Flavones	41440-05-5	2	667827	629570	632817	2.40913e+07	2.47319e+07	2.13102e+07	1.30225	0.00212464	0.019545	36.3345	5.18327	up
Hmgp002953	C29H32O17	Tricin-7-O-(2''-O-rhamnosyl)galacturonide	Flavonoids	Flavones	89915-54-8	3	22864.2	9702.18	30010	171494	163430	164838	1.24138	0.000390521	0.00867032	7.98643	2.99755	up
Hahn002359	C37H50O20	scroside H	Others	Others	-	1	9	1897.04	5005	63390.1	55041.5	67716	1.01611	0.00136176	0.0151291	26.9348	4.7514	up
MWS20194	C9H8O2	Cinnamic acid	Phenolic acids	Phenolic acids	140-10-3	3	311906	307873	287767	9	9	9	1.30199	0.000608479	0.0101978	2.97505e-05	-15.0367	down
pmb0738	C34H34O16	Tricin-7-O-(2''-Sinapoyl)glucoside	Flavonoids	Flavones	-	3	31161.6	13340	38661.4	865993	729607	706388	1.27801	0.00382728	0.0263923	27.6805	4.7908	up
Lmsp102219	C15H10O5	Aloe emodin	Quinones	Anthraquinone	481-72-1	1	329830	532524	483098	2.59439e+06	2.77815e+06	2.74284e+06	1.28451	1.15342e-05	0.00242113	6.03172	2.59257	up
Wagp008758	C20H20O9	5,4'-Dihydroxy-3,6,7,3',5'-Pentamethoxyflavone*	Flavonoids	Flavones	-	2	62216.9	23340	48345	627940	607720	1.02104e+06	1.26378	0.0335039	0.0876111	16.8534	4.07497	up
mws0052	C21H18O11	Baicalin*	Flavonoids	Flavones	21967-41-9	1	6947.63	21583.7	18401.7	355045	345185	641882	1.26286	0.046955	0.109037	28.5963	4.83776	up
Wmhn010552	C30H22O8	Trans-Emodin bianthrone*	Quinones	Anthraquinone	61281-20-7	1	2993.08	73136.2	832.097	3.23634e+06	2.83559e+06	2.41936e+06	1.19921	0.00656382	0.0346024	110.332	6.7857	up
Lmzp002365	C22H24O11	Hesperetin-7-O-glucoside	Flavonoids	Flavanones	31712-49-9	3	124391	73355	141821	9	9	9	1.30108	0.0314006	0.0842091	7.9513e-05	-13.6185	down
pmb3045	C23H22O13	Tricin-7-O-Glucuronide	Flavonoids	Flavones	-	2	1721.16	13340	9	646517	278928	514404	1.09117	0.0474132	0.109587	95.5431	6.57808	up
Zmcn005156	C26H26O12	4,5-O-Dicaffeoylquinic Acid Methyl Ester	Phenolic acids	Phenolic acids	-	3	32828	18444.8	33385.6	508372	313178	538893	1.27796	0.0260727	0.0756306	16.0698	4.00628	up
Laxp004658	C15H20O5	Phaseic Acid	Terpenoids	Sesquiterpenoids	24394-14-7	1	257830	281716	286296	1.89895e+06	2.11346e+06	1.68717e+06	1.29965	0.0054953	0.031176	6.90153	2.78692	up
MWSslk090	C16H22O11	Monotropein	Terpenoids	Monoterpenoids	5945-50-6	3	13389.2	11475	12095.8	95860.5	93454.5	95501.5	1.30073	2.6364e-07	0.000304372	7.70607	2.94599	up
Lmhn002895	C23H20O12	Feruloylcaffeoyltartaric acid	Phenolic acids	Phenolic acids	-	3	18839.7	15620.2	14713	889677	816628	834447	1.30137	0.000675982	0.0107644	51.6698	5.69125	up
mws1172	C22H22O10	Trifolirhizin (Maackiain-3-O-glucoside)	Flavonoids	Isoflavones	6807-83-6	3	20536.5	32184.1	46786.7	400761	513867	374916	1.27743	0.0096243	0.0418221	12.9593	3.69591	up
MWSslk106	C8H11N	2-Phenylethylamine	Alkaloids	Benzylphenylethylamine alkaloids	156-28-5	3	1.39902e+06	1.1818e+06	1.12275e+06	7.18387e+06	6.98562e+06	5.96128e+06	1.29733	0.00338564	0.0250707	5.43551	2.44242	up
pmb0069	C7H7NO	Benzamide	Alkaloids	Alkaloids	55-21-0	3	1.32629e+06	1.23265e+06	1.11853e+06	7.56646e+06	7.16785e+06	5.20044e+06	1.29167	0.0171988	0.0593602	5.42077	2.4385	up
MWSmce498	C27H30O14	Apigenin-7-O-neohesperidoside (Rhoifolin)*	Flavonoids	Flavones	17306-46-6	3	31170.8	22985.3	15005	126730	116302	106710	1.26272	0.000295096	0.00809373	5.05691	2.33826	up
Zmsp001834	C8H8O4	2,6-Dimethoxy-1,4-benzoquinone*	Quinones	Quinones	530-55-2	3	37109.4	41016.2	36215.4	9	9	9	1.30194	0.0014931	0.0160352	0.000236136	-12.0481	down
Smjn005692	C15H18O7S	deacetvlmatlicarin-8-O-sulfite	Terpenoids	Sesquiterpenoids	-	2	395002	479168	334829	1.84716e+07	1.47823e+07	1.71199e+07	1.29966	0.00424887	0.0277329	41.6658	5.38079	up
Zmgn002106	C11H13NO3	N-Acetyl-L-phenylalanine	Amino acids and derivatives	Amino acids and derivatives	2018-61-3	1	1.90299e+06	1.15538e+06	1.95635e+06	1.31285e+07	1.28674e+07	1.06701e+07	1.282	0.00269274	0.0222421	7.31168	2.8702	up
Zajp000573	C7H13NO2	N-(4-oxopentyl)-acetamide	Alkaloids	Alkaloids	-	1	93664.7	192315	59337.6	816227	936446	811847	1.24037	0.000204838	0.00675672	7.42657	2.8927	up
Lalp006086	C17H14O6	fistulaflavonoid B	Phenolic acids	Phenolic acids	-	2	328715	335400	524300	4.05838e+06	4.16217e+06	3.27698e+06	1.28864	0.00470829	0.0292401	9.67468	3.27421	up
MWSmce157	C7H13NO2	Stachydrine	Alkaloids	Pyrrole alkaloids	471-87-4	3	8194.91	5966.99	3340	248438	305437	274941	1.29065	0.00348999	0.0252098	47.3558	5.56547	up
Lmmp003783	C21H18O13	Quercetin-3-O-glucuronide	Flavonoids	Flavonols	22688-79-5	3	36675	29086.3	16750.4	300320	213500	273600	1.27269	0.0090231	0.040455	9.54313	3.25446	up
Lmtp002822	C25H26O13	Apigenin-6-C-arabinoside-8-C-xyloside*	Flavonoids	Flavones	-	1	975400	1.09482e+06	1.07038e+06	7.54223e+06	8.51217e+06	9.71555e+06	1.29622	0.00672746	0.0351881	8.20541	3.03658	up
NK10264324	C6H6O3	Phloroglucinol; 1,3,5-Benzenetriol	Phenolic acids	Phenolic acids	108-73-6	2	2.14066e+07	2.06473e+07	2.03404e+07	3.94456e+06	4.53197e+06	3.16468e+06	1.28905	7.54067e-06	0.00225623	0.186575	-2.42217	down
pmp000791	C15H10O5	Moracin Y	Phenolic acids	Phenolic acids	1252581-54-6	3	33875.8	29409.1	27867.3	857563	993707	828909	1.30117	0.00341833	0.0251367	29.4033	4.87791	up
MWSslk002	C21H20O10	Sophoricoside	Flavonoids	Isoflavones	152-95-4	2	131735	97212.7	71101.7	599918	596849	514558	1.27729	0.000398604	0.00869178	5.70348	2.51184	up
MWSprf018	C30H48O2	3-Hydroxylup-20(29)-en-28-al (Betulinaldehyde)	Terpenoids	Triterpene	13159-28-9	2	138785	144587	104825	4.72967e+06	4.36675e+06	3.52249e+06	1.30007	0.00754967	0.0370898	32.5065	5.02266	up
MW0063708	C30H48O4	Sumaresinol	Terpenoids	Triterpene	559-64-8	3	4751.14	6652.77	7273.4	69589.2	92894	72983.6	1.29199	0.00937613	0.0412371	12.6071	3.65617	up
pmp000592	C27H30O15	Apigenin-7,4'-di-O-Glucoside	Flavonoids	Flavones	-	3	358289	339215	455735	28109.3	48487.7	88365	1.24335	0.00425166	0.0277329	0.143042	-2.80549	down
Lmzn001572	C27H26O18	Scutellarein-7-O-glucuronosyl-(1->2)-glucuronide	Flavonoids	Flavones	150641-65-9	1	11887.8	2165.37	8649.46	51046.5	36107.2	26945.5	1.11213	0.0349172	0.0897816	5.02581	2.32936	up
pmn001669	C12H14O5	Methyl sinapate	Phenolic acids	Phenolic acids	20733-94-2	3	7918	6544.25	6547.59	42089	36536.4	33998	1.29686	0.00478382	0.0293437	5.36051	2.42237	up
Zaln004057	C16H16O8	4-caffeoylshikimic acid	Phenolic acids	Phenolic acids	-	1	105045	52659.7	95035	9	9	9	1.30074	0.0344611	0.0889127	0.000106829	-13.1924	down
Lmtn001569	C20H29NO12	2-Glucosyl-glucosyloxy-2-phenylacetic acid amide	Alkaloids	Alkaloids	-	3	9	9	9	9845.61	8268.8	10005	1.30166	0.00348289	0.0252098	1041.46	10.0244	up
Lmmp004628	C39H38O22	Chrysoeriol-7-O-[2''-O-(2'''-Sinapoyl)glucuronyl]glucuronide	Flavonoids	Flavones	-	2	11670	8301.49	27255.7	6.47603e+06	5.17842e+06	6.9504e+06	1.29158	0.00724491	0.0364455	393.944	8.62185	up
Lamp008170	C18H20O6	5,7,4'-Tri-O-Methylcatechin	Flavonoids	Other Flavonoids	105330-59-4	2	16163.4	141954	170105	4.03493e+06	4.59718e+06	2.92199e+06	1.21359	0.0161643	0.0575091	35.2021	5.13759	up
Lsjp211255	C30H48O2	1-Hydroxylup-20(29)-en-3-one (Glochidonol)	Terpenoids	Triterpene	23963-54-4	1	194249	145041	171335	906507	742275	913508	1.28956	0.0044469	0.0286581	5.01795	2.3271	up
Lmmp005104	C37H34O20	Apigenin-7-O-(2''-feruloyl)glucuronide-5-O-glucuronide	Flavonoids	Flavones	-	1	70855.8	61912.9	45091.9	3.04136e+07	2.36346e+07	2.76198e+07	1.3008	0.00520218	0.0303329	459.169	8.84288	up
Zjxp110323	C15H20O3	Telekin/Ivalin	Terpenoids	Sesquiterpenoids	-	3	819341	715522	1.26766e+06	135758	98620.3	71053.9	1.26585	0.0376004	0.0944421	0.108985	-3.1978	down
Lmtp002942	C25H26O13	Apigenin-6,8-di-C-arabinoside*	Flavonoids	Flavones	-	1	432568	450918	448126	7.3794e+06	6.18079e+06	11919185	1.28698	0.044047	0.103992	19.1342	4.25808	up
Lskp211459	C30H46O2	Olean-12-ene-3,16-dione (Maniladione)	Terpenoids	Triterpene	-	2	75025	37406	35010	2.42585e+06	2.41158e+06	2.70461e+06	1.29221	0.0012579	0.0148175	51.1529	5.67674	up
pmp000566	C16H14O5	Claussequinone	Flavonoids	Other Flavonoids	35878-39-8	3	53597.9	30969	40010	217901	253938	244529	1.27931	0.000327772	0.00825823	5.75041	2.52367	up
pme0274	C6H13NO2	6-Aminocaproic acid	Organic acids	Organic acids	60-32-2	2	305880	151238	404203	1.5725e+06	1.48364e+06	1.48809e+06	1.23252	0.00123011	0.0146939	5.27588	2.39941	up
Lmfn004093	C21H24O10	Phloretin-4'-O-glucoside (Trilobatin)	Flavonoids	Chalcones	4192-90-9	3	65069.9	17885.4	46023.1	460316	261425	542605	1.21571	0.0421667	0.101287	9.80277	3.29319	up
MWS00275g	C9H11NO3	DL-O-tyrosine	Amino acids and derivatives	Amino acids and derivatives	2370-61-8	1	1.09412e+06	93990.2	878627	4.40586e+06	4.03759e+06	4.04586e+06	1.06255	0.00316376	0.024537	6.04301	2.59527	up
Smrp002240	C15H10O5	Sulphuretin	Flavonoids	Aurones	120-05-8	3	63162.3	108380	124600	828533	910487	1.51278e+06	1.26314	0.0438508	0.103635	10.9805	3.45688	up
ML10179289	C8H10O	2-Phenylethanol	Phenolic acids	Phenolic acids	60-12-8	2	1.82116e+06	1.61614e+06	1.25761e+06	8.91355e+06	8.93811e+06	7.44334e+06	1.29096	0.00251179	0.021153	5.38775	2.42968	up
Lssp210438	C16H12O6	3'-O-methylorobol(ISO1)	Others	Others	-	2	72028.3	262080	264336	5693280	9.958e+06	7208000	1.26367	0.0268875	0.0769309	38.1978	5.25542	up
mws0011	C17H24O9	Syringin	Phenolic acids	Phenolic acids	118-34-3	3	27133.4	54609.8	30423	566938	846004	758625	1.28411	0.0133602	0.0507712	19.3603	4.27503	up
Lmmp004300	C42H40O25	Apigenin-7-O-{3''-O-[2'''-O-(2''''-p-Coumaroyl)glucuronyl]glucuronyl}glucuronide	Flavonoids	Flavones	-	3	158425	22146.6	57008.1	2.07562e+07	9.72745e+06	1.47623e+07	1.2716	0.0422817	0.101287	190.445	7.57323	up
Lmgp004959	C29H34O16	Tricin-7-O-neohesperidoside*	Flavonoids	Flavones	53766-40-8	3	9	9	9	425195	409567	426571	1.30202	0.000168179	0.00638685	46716.1	15.5116	up
Hmgp003086	C29H34O16	Tricin-7-O-rutinoside*	Flavonoids	Flavones	-	3	9	9	9	425195	409567	426571	1.30202	0.000168179	0.00638685	46716.1	15.5116	up
Lmmp007120	C33H30O16	Tricin-7-O-(2''-feruloyl)glucuronide	Flavonoids	Flavones	-	3	11898.2	20961.7	28751.4	299177	378886	348177	1.27858	0.00384054	0.0263923	16.6567	4.05803	up
mws0420	C15H16O5	Lactucin	Terpenoids	Sesquiterpenoids	1891-29-8	3	9	9	9	68330.2	70291.8	129600	1.29943	0.0470338	0.109037	9934.15	13.2782	up
Wbmn005130	C23H30O12	6-O-Vanilloylajugol(ISO-1)	Terpenoids	Monoterpenoids	-	3	28340	15600.5	16725	72420.2	140075	106554	1.23754	0.0427482	0.101758	5.25915	2.39483	up
Lmzp004885	C17H14O7	Tricin (5,7,4'-Trihydroxy-3',5'-dimethoxyflavone)	Flavonoids	Flavones	520-32-1	2	133801	99337.3	127345	8.80995e+06	7.71143e+06	8.64923e+06	1.30034	0.00169636	0.0171794	69.8246	6.12566	up
pmp001260	C22H37NO3	N-(2-Hydroxyethyl)eicosapentaenoic acid	Lipids	Free fatty acids	-	3	9	9	9	1.25056e+06	852675	1.30663e+06	1.30144	0.01544	0.0557046	126291	16.9464	up
Zmsn002575	C17H24O11	Hastatoside	Terpenoids	Monoterpenoids	50816-24-5	3	47193.5	53474.1	60050.4	9	9	9	1.30198	0.00476779	0.0293437	0.000167996	-12.5393	down
mad1424	C17H14O13	Ditartaroyl-hydroxycoumarin	Lignans and Coumarins	Coumarins	-	3	476687	328514	516809	9	9	9	1.30174	0.0164697	0.0580587	2.04234e-05	-15.5794	down
Lmmp003487	C27H26O18	Luteolin-7-O-glucuronide-(2→1)-glucuronide	Flavonoids	Flavones	-	2	8078.32	34025.3	26675	256698	239745	187698	1.2223	0.005037	0.0300528	9.947	3.31426	up
Lmmp004360	C44H44O27	Tricin-7-O-[glucuronyl(1→3)]-[(2''-O-p-Coumaroyl)glucuronyl](2→1)glucuronide	Flavonoids	Flavones	-	3	60033.2	35010	40975.8	2.52542e+07	2.11699e+07	2.56482e+07	1.29998	0.00354481	0.0252622	529.869	9.04949	up
Lhwp110301	C30H46O4	19-Hydroxy-2-(hydroxymethyl)-A(1)-norursa-2,12-dien-28-oic acid (Coleonolic acid)	Terpenoids	Triterpene	-	3	11612.6	9154.05	11171.4	73594.4	65836.7	53282.2	1.29322	0.0109934	0.0449889	6.03397	2.59311	up
MWStz104	C9H11NO3	3,4-Dimethoxybenzamide	Alkaloids	Phenolamine	1521-41-1	3	61223.3	36137.5	77042.9	375010	371907	211953	1.23665	0.034687	0.0892892	5.498	2.45891	up
HX1184	C30H48O	Lup-20(29)-en-3-one (Lupenone)(ISO2)	Terpenoids	Triterpene	-	2	16336.8	57880.1	22352.8	1.75144e+06	1.55274e+06	1.76438e+06	1.28034	0.00123457	0.0146939	52.486	5.71386	up
pmn001477	C20H20O11	4-C-Glucose-1,3,6-trihydroxy-7-methoxyxanthone	Flavonoids	Other Flavonoids	-	3	9	9	9	105754	95066.7	150365	1.30074	0.0202966	0.0648953	13006.9	13.667	up
Lmhp005872	C25H30N2O6	Diferuloylcadaverine	Alkaloids	Phenolamine	-	3	40539	15504	36675	1.26424e+06	1.45937e+06	1.14031e+06	1.28489	0.00516	0.0303167	41.6739	5.38107	up
Zmhn002647	C42H42O18	Emodin(10-10')emodin double monosaccharide glucosides	Quinones	Anthraquinone	-	1	8482.51	40329.8	6569.32	2.19845e+06	1.84055e+06	1.86814e+06	1.27108	0.00322348	0.0247276	106.663	6.73691	up
Lmmp006540	C34H32O17	Tricin-7-O-(2''-Sinapoyl)glucuronide	Flavonoids	Flavones	-	3	16675	1909.05	11980	205035	271924	168957	1.20568	0.019216	0.0628466	21.1332	4.40144	up
Lmsp008264	C18H16O6	4'-Hydroxy-5,6,7-trimethoxyflavone	Flavonoids	Flavones	6938-18-7	3	37350	29864.7	20805.4	172232	177485	156181	1.2799	0.000109532	0.00523502	5.74753	2.52294	up
Lcyp000673	C17H14O7	Prudomestin	Flavonoids	Flavonols	3443-28-5	2	97389.9	76688.5	84103.7	7.50624e+06	6.05021e+06	7.71238e+06	1.30024	0.0055273	0.0312652	82.3792	6.36421	up
Lmmp003941	C42H40O25	Apigenin-7-O-(2''-p-Coumaroyl)glucuronide-4'-O-(2''-O-glucuronyl)glucuronide	Flavonoids	Flavones	-	3	18340	21407.2	29116.4	2.87873e+06	3.71971e+06	4.6039e+06	1.29658	0.0175359	0.0601641	162.674	7.34584	up
Lmcp004369	C17H14O7	Quercetin-3',4'-dimethyl ether	Flavonoids	Flavonols	3306-29-4	1	9	9	9	363743	374072	344362	1.30214	0.000582299	0.0100338	40080.6	15.2906	up
Zmcp102205	C15H24O	Spathulenol	Terpenoids	Sesquiterpenoids	6750-60-3	3	2.35346e+06	1.64276e+06	2.36634e+06	9	9	9	1.30188	0.0124701	0.0487789	4.24357e-06	-17.8463	down
Yshs000048	C30H46O4	6-Hydroxy-lupane-20(29)-en-3-one-28-oic acid	Terpenoids	Triterpene	-	3	8074.75	3447.05	6127.15	55687.7	46634.5	28609.5	1.24631	0.038426	0.0951991	7.41867	2.89116	up
Lhwp110126	C30H48O4	3-Epialphitolic acid	Terpenoids	Triterpene	-	2	12136.4	29040.4	20616.9	159345	285834	288260	1.25813	0.0328744	0.0866991	11.8692	3.56915	up
WaYn002595	C13H18O10S	Salicin 6'-Sulfate	Phenolic acids	Phenolic acids	-	2	9	9	9	2.18193e+06	2.4044e+06	1.60301e+06	1.30229	0.0131396	0.0504813	229235	17.8065	up
pmp000238	C26H28O15	Luteolin-6-C-arabinoside-7-O-glucoside	Flavonoids	Flavones	-	3	9	9	9	29286	24837.6	18737.4	1.30226	0.0154931	0.0558089	2698.56	11.398	up
Wafn003633	C18H32O9	1-O-Acetyl-Glucopyranose 6-Hydroxydecanoate	Others	Saccharides	-	2	20854.8	10818.7	17092.3	66674.6	107803	102431	1.24983	0.0230627	0.0699495	5.67833	2.50547	up
Hmjp003123	C21H18O13	Quercetin-5-O-glucuronide	Flavonoids	Flavonols	-	2	123399	130690	95130.2	1.43506e+06	2.30072e+06	2.04948e+06	1.29141	0.0193962	0.0631676	16.5663	4.05018	up
pmp001110	C25H26O13	Apigenin-6-C-xyloside-8-C-arabinoside	Flavonoids	Flavones	-	1	322667	400957	619068	3.61396e+06	3.14506e+06	2962165	1.27709	0.00135293	0.0151291	7.24007	2.856	up
MWSHY0061	C27H30O15	Kaempferol-3-O-neohesperidoside*	Flavonoids	Flavonols	32602-81-6	3	16646.1	10005	36984.1	186655	146745	216835	1.22624	0.00789138	0.0379608	8.64672	3.11215	up
pmb2975	C23H26O11	Hesperetin-3'-O-glucuronide	Flavonoids	Flavanones	1237479-05-8	3	45129.3	38610.5	31801.1	9	9	9	1.3015	0.00983915	0.042529	0.000233683	-12.0632	down
Zmcn006884	C42H66O14	Chikusetsusaponin IVa	Terpenoids	Triterpene Saponin	51415-02-2	2	1358.84	1608.8	1108.82	32280.8	57903.9	32849.7	1.29246	0.0424786	0.101535	30.1817	4.9156	up
Hmln002149	C29H36O15	Acteoside; Verbascoside	Phenolic acids	Phenolic acids	61276-17-3	3	21675	30470.7	17299.6	199709	185571	145542	1.28381	0.00811913	0.0382955	7.64373	2.93428	up
Lmmp004361	C45H46O28	Tricin-7-O-[glucuronyl(1→3)]-[(2''-O-Feruloyl)glucuronyl](2→1)glucuronide	Flavonoids	Flavones	-	3	15950.1	6670	7685.7	1.14986e+07	1.1676e+07	1.41883e+07	1.2978	0.00483548	0.0293437	1232.86	10.2678	up
Lmcp004624	C16H12O6	3-Methylkaempferol	Flavonoids	Flavonols	1592-70-7	2	58350	31163.3	39094.9	2.201e+06	2.08414e+06	2.41077e+06	1.29585	0.00178301	0.0173955	52.0644	5.70223	up
Lmlp005572	C21H20O10	Galangin-7-O-glucoside	Flavonoids	Flavones	-	1	103573	78094.7	145080	668533	651770	438273	1.26139	0.0179432	0.0606283	5.38207	2.42816	up
Zjxp110307	C17H28O3	3-Hydroxy-3,7,11-trimethyldodeca-1,6E,10-trien-9-yl propionate	Terpenoids	Sesquiterpenoids	-	3	668902	344133	347148	2.96578e+06	3.94452e+06	3.12344e+06	1.26934	0.00580734	0.0321562	7.37675	2.88299	up
Zjlp100905	C31H48O5	3-Hydroxyolean-12-ene-28,30-dioic acid 30-methyl ester (Serjanic Acid)	Terpenoids	Triterpene	-	2	21990.9	53290.2	37113.5	2056415	1.41083e+06	915630	1.28273	0.0497418	0.11338	38.9954	5.28523	up
MWSslk201	C21H26O10	Sec-O-Glucosylhamaudol	Others	Chromone	80681-44-3	2	2.08272e+06	2.7719e+06	3.30482e+06	486024	460325	591832	1.28316	0.0235349	0.0701686	0.188516	-2.40724	down
Yamp004530	C40H42N2O9	Pyramidaglain B	Alkaloids	Alkaloids	-	3	424618	91700	283082	3.00386e+06	3.20677e+06	3.81294e+06	1.22934	0.00246131	0.020894	12.5389	3.64834	up
Lmjn007168	C17H14O7	Quercetin-3,3'-dimethyl ether	Flavonoids	Flavonols	4382-17-6	1	13651.7	15184.8	17505.7	166692	261969	173269	1.29203	0.0262998	0.0759077	12.9888	3.6992	up
Zmmp004183	C10H17NO5	(3-carboxypropanoyl)-L-leucine	Amino acids and derivatives	Amino acids and derivatives	-	1	213581	367145	318695	5.83428e+06	6.14015e+06	10518215	1.28326	0.0413434	0.100065	25.0079	4.64431	up
Laxp010102	C30H48O4	complogenin	Terpenoids	Triterpene	-	3	9	9	9	37595.1	36504.4	29877.9	1.30234	0.00480778	0.0293437	3851.02	11.911	up
pmb0713	C29H34O17	Tricin-7-O-(2''-O-glucosyl)glucoside	Flavonoids	Flavones	-	3	16675	24404.1	15980	9	9	9	1.30107	0.0195758	0.0635733	0.000473194	-11.0453	down
Smdp002817	C13H21NO3	Farfugine	Alkaloids	Pyrrole alkaloids	86194-08-3	3	13040.9	38787.8	11414.9	133895	96404.2	91125.9	1.18851	0.00884244	0.0401124	5.08234	2.34549	up
pmp001290	C27H26O17	Apigenin-7-O-(2''-glucurosyl)glucuronide	Flavonoids	Flavones	74696-01-8	1	3340	6670	3340	173445	158425	127467	1.29173	0.00786444	0.0379608	34.4072	5.10464	up
Lhhp111109	C35H40O11	Schisantherin J	Lignans and Coumarins	Lignans	135432-28-9	1	4916.97	6699.6	4656.26	53537.9	58030.7	32831.5	1.28283	0.0307325	0.0833858	8.8737	3.14954	up
Lmmp003850	C43H42O26	Apigenin-7-O-{3''-O-[2'''-O-(2''''-Feruloyl)glucuronyl]glucuronyl}glucuronide	Flavonoids	Flavones	-	3	6443.72	13372.1	11975	4.16527e+06	6297970	3.51239e+06	1.29709	0.0312209	0.0838246	439.611	8.78008	up
Qmfp122218	C30H46O4	2,3-Dihydroxyurs-12,18-dien-28-oic acid (Goreishic Acid I)	Terpenoids	Triterpene	-	3	22869.6	43964.9	6006.53	223426	254685	287804	1.18984	0.00122093	0.0146939	10.5149	3.39436	up
Lmtp006291	C15H22O3	Damsinic acid	Terpenoids	Sesquiterpenoids	22844-19-5	2	1.3586e+06	1.71698e+06	1.76241e+06	160162	353437	364868	1.24646	0.00271346	0.0222967	0.181577	-2.46135	down
Zjgp101331	C42H64O16	glyyunnansapogenin A-GlcA-Glc	Terpenoids	Triterpene Saponin	-	1	13340	7761.7	2969.48	76690	58112.7	56839.8	1.21227	0.00519696	0.0303329	7.96149	2.99304	up
Lhdp091318	C42H66O14	Soyasaponin E glucuronic acid glucoside	Terpenoids	Triterpene Saponin	-	1	10966.6	6938.31	6946.45	137782	102764	89241.8	1.28978	0.0189361	0.0620192	13.2704	3.73014	up
HJN069	C30H24O12	Tetrahydroxyflavan-(4α-8-epicatechin)	Flavonoids	Flavanols	-	3	17935.6	6389.47	2905.73	125766	133400	85264.1	1.21718	0.0133888	0.0507712	12.6486	3.6609	up
Hmgp002564	C29H30O19	Tricin-7-O-glucuronyl(2→1)glucuronide	Flavonoids	Flavones	83097-44-3	1	3491.83	4176.26	11853.1	52143.8	41712.5	31285.4	1.20568	0.0157793	0.0565753	6.41055	2.68045	up
Hmmp002474	C33H38O20	Apigenin-7-O-rutinoside-4'-O-glucuronide	Flavonoids	Flavones	-	3	9	3466.51	6670	444030	403910	188749	1.08029	0.0496086	0.113188	102.182	6.675	up
Lhdp090710	C42H68O14	Soyasaponin Bb'(iso-01)*	Terpenoids	Triterpene Saponin	-	1	18340	30010	31395	561162	486379	345240	1.28871	0.0199188	0.0642355	17.4654	4.12643	up
