# Supplementary material for: Influence on the fermentation quality, microbial diversity, and metabolomics in the ensiling of sunflower stalks and alfalfa
Source: Front Plant Sci. 2024 Jan 26;15:1333207. doi: 10.3389/fpls.2024.1333207 (PMC10853385; doi:10.3389/fpls.2024.1333207)
Supplement: Supplementary file 4 [file Table_4.xlsx]

## Sheet: Sheet1
Index	Formula	Compounds	Class I	Class II	CAS	Level	A0S10_1	A0S10_2	A0S10_3	A6S4_1	A6S4_2	A6S4_3	VIP	P-value	FDR	Fold_Change	Log2FC	Type
Zmap010726	C20H32O5	Balsamiferine E	Terpenoids	Sesquiterpenoids	-	3	109327	122050	113171	607189	598706	551045	1.29269	0.000889347	0.015002	5.09926	2.35029	up
Lmyn004949	C15H10O5	3,7,3'-Trihydroxyflavone	Flavonoids	Flavones	-	2	49540.7	79216.1	23768.6	1.38151e+06	1.36557e+06	1.46009e+06	1.27045	2.4749e-05	0.00476625	27.5834	4.78573	up
mws0254	C6H9N3O2	L-Histidine	Amino acids and derivatives	Amino acids and derivatives	71-00-1	2	3.38782e+07	3.84165e+06	3.47076e+07	1.34201e+08	1.2216e+08	1.40756e+08	1.04948	0.00234786	0.0222417	5.48297	2.45496	up
mws1659	C15H10O5	Emodin	Quinones	Anthraquinone	518-82-1	1	127227	741612	127320	5.04122e+06	3.38904e+06	3.00859e+06	1.1941	0.0219534	0.0638971	11.483	3.52142	up
pmp000003	C16H12O7	Nepetin (5,7,3',4'-Tetrahydroxy-6-methoxyflavone)	Flavonoids	Flavones	520-11-6	1	183304	136526	226360	1.01869e+06	967166	976934	1.27257	5.76205e-05	0.00516616	5.42447	2.43948	up
pmb0865	C26H48NO7P	LysoPC 18:3(2n isomer)	Lipids	LPC	-	1	2553.14	4822.33	5572.92	31610.4	16589	22126.3	1.22402	0.0437827	0.103352	5.43124	2.44128	up
mws4057	C15H10O4	7,4'-Dihydroxyflavone	Flavonoids	Flavones	2196-14-7	3	53920	56868.1	41804.3	4.58379e+06	4.04946e+06	5.51939e+06	1.29215	0.00836123	0.0367354	92.748	6.53524	up
Lman002117	C15H18O9	Grevilloside Q	Others	Ketone compounds	1708967-64-9	3	84950.9	10406.7	31285.4	1.34777e+06	1.27626e+06	1.41391e+06	1.22873	6.69364e-05	0.00516616	31.8844	4.99478	up
Cmdn004031	C29H36O16	R-Campneoside II	Phenolic acids	Phenolic acids	91050-24-7	3	9	9	9	336508	499250	275609	1.29267	0.0309705	0.081969	41161.8	15.329	up
zjgp122326	C12H15NO7	Pyridine-4-formyl-O-β-D-glucopyranoside	Others	Others	-	2	4.63224e+06	5.40363e+06	4.7478e+06	104435	127004	149311	1.29187	0.00243372	0.0225028	0.0257547	-5.27902	down
Zbfn003303	C16H18O8	3-(Hydroxycinnamoyl)-quinic acid*	Phenolic acids	Phenolic acids	-	2	969596	661294	1.03249e+06	89913	54958.9	249508	1.18378	0.00984129	0.0401985	0.148075	-2.7556	down
Lmhn004976	C16H12O6	Aracarpene 2	Flavonoids	Isoflavones	-	3	846487	801835	688523	1.23055e+07	1.06693e+07	1.10619e+07	1.29281	0.00200743	0.0209917	14.5652	3.86446	up
pmn001689	C18H32O4	9-Hydroxy-12-oxo-15(Z)-octadecenoic acid	Lipids	Free fatty acids	-	3	1.77937e+06	1.2932e+06	1.64086e+06	1.18442e+07	9.90745e+06	1.04952e+07	1.28536	0.00244877	0.0225028	6.84149	2.77431	up
Zadn009075	C18H32O4	Hydroperoxylinoleic acid	Lipids	Free fatty acids	34444-18-3	2	1.77937e+06	1.2932e+06	1.64086e+06	1.18442e+07	9.90745e+06	1.04952e+07	1.28536	0.00244877	0.0225028	6.84149	2.77431	up
HJN091	C22H22O10	Prunetin-4'-O-glucoside(Prunitrin)	Flavonoids	Isoflavones	154-36-9	3	49534.1	49488.1	71407.8	2.36026e+06	1.84042e+06	2.12422e+06	1.28978	0.0052374	0.0300379	37.1115	5.21379	up
Lhmp122201	C16H12O4	dalbergin	Lignans and Coumarins	Coumarins	482-83-7	1	116095	49114.2	87984	1.31699e+07	9.17479e+06	1.86852e+07	1.28229	0.038762	0.0946923	162.049	7.34029	up
Zmhn000563	C15H20O9	Syringic acid 4-O-rhamnoside	Lignans and Coumarins	Lignans	-	3	916363	916223	1.21746e+06	187093	46273.9	255839	1.14199	0.00382131	0.0254497	0.160393	-2.64032	down
Hmsp000364	C7H13NO2	L-Cyclopentylglycine	Amino acids and derivatives	Amino acids and derivatives	2521-84-8	2	728180	600690	766897	2.31025e+07	1.99785e+07	1.98464e+07	1.29186	0.00269279	0.0229567	30.0259	4.90814	up
Laxp008852	C17H14O5	(2Z)-2-(3,4-Dimethoxybenzylidene)-6-Hydroxy-1-Benzofuran-3(2H)-One	Flavonoids	Other Flavonoids	1322574-14-0	1	205810	236001	152872	4.72005e+07	3.7964e+07	4.65428e+07	1.29292	0.00460045	0.028126	221.475	7.791	up
Lmhn002437	C7H6O4	Terreic acid	Others	Ketone compounds	121-40-4	1	8.69782e+07	8.94533e+07	106613272	1.33287e+07	1.21703e+07	1.40715e+07	1.29011	0.00543681	0.0306451	0.139803	-2.83853	down
pme3233	C16H12O5	Calycosin	Flavonoids	Isoflavones	20575-57-9	1	2.12311e+06	2.07666e+06	1188275	3.96511e+07	2.96235e+07	4.04773e+07	1.2833	0.00949081	0.0400242	20.3695	4.34834	up
Wbmn010746	C22H34O5	Negundoin A	Terpenoids	Ditepenoids	-	1	1.41782e+06	498988	3.62858e+07	1.49237e+08	108342595	1.54386e+08	1.06405	0.00308514	0.0242509	10.7837	3.43078	up
Lmhn007973	C36H56O9	Quinovic acid-3-O-rhamnoside	Terpenoids	Triterpene	104055-76-7	2	204453	277345	197869	3.77511e+07	2.91593e+07	2.51805e+07	1.29262	0.0144948	0.0496259	135.494	7.08209	up
mws0905	C16H14O4	Medicarpin	Flavonoids	Isoflavones	32383-76-9	1	33956.5	23584.7	25352.1	2.38511e+06	2.37946e+06	2.61339e+06	1.29153	0.000985015	0.0154437	89.0055	6.47582	up
Yacn003968	C11H13NO3	Cantleyine	Alkaloids	Alkaloids	30333-81-4	1	1.03195e+06	1.00387e+06	928364	2.28099e+07	2.10015e+07	1.86377e+07	1.29325	0.00367242	0.0253481	21.0679	4.39697	up
mws1189	C6H10O7	D-Galacturonic acid*	Others	Saccharides	685-73-4	1	1.98842e+06	165784	1.07486e+06	6.72256e+06	6.33291e+06	7.60432e+06	1.07239	0.00133037	0.0167092	6.39807	2.67764	up
Layp007325	C15H12O4	Bauhinoxepin J	Others	Alcohol compounds	942513-05-5	3	1.67226e+06	1.51672e+06	1.17499e+06	2.80207e+07	2.67601e+07	33848974	1.28949	0.00581105	0.0316376	20.3094	4.34408	up
Hahn001280	C10H12O5	piscrocin C	Others	Others	-	1	9.78701e+06	1.54118e+07	9.62245e+06	1.70448e+06	2.06584e+06	1.93481e+06	1.27114	0.0360056	0.0902482	0.163841	-2.60964	down
pmb3031	C20H20O9	Tricin-4'-O-glycerol	Flavonoids	Flavones	-	3	94320.7	61418.5	29994	804372	850206	813533	1.25689	1.03167e-05	0.00465114	13.2885	3.7321	up
mws1434	C21H20O10	Apigenin-6-C-glucoside (Isovitexin)*	Flavonoids	Flavones	38953-85-4	1	855521	752860	741272	7.02753e+06	1.20335e+07	8.58363e+06	1.27943	0.0293605	0.0790352	11.7654	3.55648	up
Xmyn008071	C16H12O6	Gnetifolin B*	Flavonoids	Flavones	140671-06-3	1	902306	862932	746143	1.32969e+07	1.203e+07	1.06139e+07	1.29216	0.00467862	0.0284557	14.3112	3.83907	up
Lmmp007480	C15H12O4	2,4,4'-trihydroxychalcone*	Flavonoids	Chalcones	-	1	1.7566e+06	1.50312e+06	1.23653e+06	3.01302e+07	2.76428e+07	3.59184e+07	1.28952	0.00657024	0.0334418	20.8377	4.38112	up
Zmjn001030	C10H14N5O7P	Adenosine 2'-Phosphate	Nucleotides and derivatives	Nucleotides and derivatives	130-49-4	3	54837.5	24207.7	47212.2	251771	222153	192366	1.23422	0.00245383	0.0225028	5.27724	2.39978	up
pme3705	C6H10O7	D-Glucoronic acid*	Others	Saccharides	6556-12-3	1	2.00531e+06	173266	1.14521e+06	6.24847e+06	6.17619e+06	7.69021e+06	1.06395	0.0015329	0.0177177	6.0518	2.59736	up
Lmmn005092	C47H72O20	Medicagenic acid-3-O-glucuronide-28-O-rhamnosyl(1,2)-arabinoside	Terpenoids	Triterpene Saponin	-	2	110257	19769.4	81762.1	2.77938e+06	3.0266e+06	2.6959e+06	1.24455	0.000654106	0.0136717	40.1433	5.32709	up
Laxp006572	C15H10O4	Hispidol	Flavonoids	Other Flavonoids	5786-54-9	1	269099	373396	290202	3.30296e+07	2.76821e+07	3.51332e+07	1.2928	0.00487128	0.0288888	102.761	6.68315	up
Lcsn006335	C14H28O3	2-Hydroxymyristic acid	Organic acids	Organic acids	2507-55-3	1	2.50293e+06	1.57909e+06	1.76397e+06	3.03129e+07	3.01554e+07	2.91887e+07	1.28644	6.99531e-07	0.000808308	15.3365	3.9389	up
Lmdn007639	C15H12O4	3,9-Dihydroxypterocarpan	Flavonoids	Isoflavones	61135-91-9	1	259480	228644	196914	3.95642e+06	3.57422e+06	4.71907e+06	1.29	0.00740146	0.034576	17.8818	4.16042	up
Walp006014	C20H18O8	Clemiscosin A	Lignans and Coumarins	Coumarins	-	1	2.17471e+07	2.06315e+07	2.56323e+07	3.18777e+06	4.61374e+06	3.23066e+06	1.28242	0.00351333	0.0251188	0.162212	-2.62405	down
Lmqn009304	C19H18O5	Eucalyptin (5-Hydroxy-7,4'-dimethoxy-6,8-dimethylflavone)	Flavonoids	Flavanones	3122-88-1	3	2.49444e+06	728064	2.34352e+06	4.37706e+07	3.24879e+07	3.47901e+07	1.2486	0.00811205	0.036261	19.9511	4.3184	up
Hahn002259	C37H50O21	kurroaoside C	Others	Others	-	2	9	9	9	10265.1	11670	12120	1.29322	0.00241655	0.0225028	1261.3	10.3007	up
MWS3136	C8H8O4	4-Methoxysalicylic Acid	Phenolic acids	Phenolic acids	2237-36-7	3	106360	102585	71480.2	644711	553436	633804	1.28288	0.00105843	0.0155917	6.53276	2.70769	up
Wasn002329	C16H17NO9	Xanthurenic Acid 8-O-Glucoside	Alkaloids	Quinoline alkaloids	97451-32-6	2	16556.5	9486.39	4174.18	57021.2	42119.3	59922.3	1.17856	0.0047535	0.0286269	5.26401	2.39616	up
mws1405	C15H8O5	Coumestrol	Lignans and Coumarins	Coumarins	479-13-0	2	93012	82504	31694.6	5.77858e+06	4.35512e+06	6.957e+06	1.27883	0.0173494	0.0553791	82.4798	6.36597	up
Zmdn005358	C20H22O7	Vladinol D	Lignans and Coumarins	Lignans	-	3	1.53592e+07	1.17007e+07	1.57015e+07	2.14481e+06	2.61764e+06	2.31033e+06	1.28691	0.0106956	0.0415858	0.165401	-2.59596	down
mws1178	C16H16O4	Vestitol	Flavonoids	Other Flavonoids	35878-41-2	1	31877.9	27710.7	31911.5	2.15529e+06	1.877e+06	2.49711e+06	1.29219	0.00690775	0.0342557	71.3595	6.15703	up
Wmmn002441	C10H16O3	(E)-Linalool-1-oic acid	Lipids	Free fatty acids	-	3	395555	125987	180343	1.40083e+06	1.18402e+06	1.1742e+06	1.20685	0.000814446	0.0142093	5.35563	2.42106	up
MWSmce230	C8H8O5	Methyl gallate	Phenolic acids	Phenolic acids	99-24-1	2	395555	125987	180343	1.40083e+06	1.18402e+06	1.1742e+06	1.20685	0.000814446	0.0142093	5.35563	2.42106	up
MWS2376	C7H12O3	4-Hydroxycyclohexylcarboxylic acid	Organic acids	Organic acids	3685-26-5	1	5.47326e+06	4.17858e+06	5.5676e+06	1.0466e+06	988060	610953	1.26322	0.0070491	0.0344684	0.173831	-2.52424	down
mws1177	C16H12O5	Maackiain	Flavonoids	Isoflavones	2035-15-6	2	4547.76	6455.37	6869.52	434458	420067	431729	1.2915	7.44047e-05	0.00554675	71.9677	6.16928	up
Zbqp002414	C11H20N2O5	h-gamma-Glu-leu-oh	Amino acids and derivatives	Amino acids and derivatives	-	1	85787.5	48226.1	126456	1.6189e+06	1.28089e+06	1.81197e+06	1.26577	0.00959736	0.0401803	18.0894	4.17708	up
mws0902	C15H12O4	Liquiritigenin	Flavonoids	Flavanones	578-86-9	1	964864	782068	927676	2.25156e+07	1.9765e+07	2.65845e+07	1.29041	0.00792583	0.0357746	25.7477	4.68637	up
MWSmce184	C12H10O4	Ethyl 3-coumarincarboxylate	Lignans and Coumarins	Coumarins	1846-76-0	3	5.10504e+06	4.52676e+06	6.93248e+06	1.35552e+06	858996	858154	1.25755	0.0206388	0.0617826	0.1855	-2.43051	down
Wcsn008935	C20H28O4	2-hydroxy-3-(4,8,12-trimethyl-10-oxotrideca-3,7,11-trienyl)-2H-furan-5-one	Others	Others	-	3	1.70396e+06	836520	1.6079e+06	9.83183e+06	7.89162e+06	7.89118e+06	1.25106	0.00314293	0.0243879	6.17461	2.62635	up
MWS20169	C15H10O5	2,5-dihydroxy-1-methoxy-anthraquinone	Quinones	Anthraquinone	-	3	21845.1	41384	21866.2	2.41391e+06	1.79034e+06	3.64736e+06	1.28438	0.0416466	0.0996328	92.2685	6.52777	up
pme3440	C15H12O5	Butein	Flavonoids	Chalcones	487-52-5	3	90035	35231.6	101710	2.14065e+06	2.15927e+06	2.4851e+06	1.26676	0.00198292	0.0209248	29.893	4.90174	up
Hmbn002645	C8H8O3	3,4-Dihydroxyacetophenone	Others	Ketone compounds	1197-09-7	2	26502.5	70533.4	78035	491092	349217	436008	1.22561	0.00621683	0.0326525	7.29028	2.86597	up
Sadn007155	C17H18O3	4-(hydroxymethyl)-1,8-dimethyl-9,10-dihydrophenanthrene-2,7-diol	Terpenoids	Ditepenoids	-	2	64559.9	48777.4	41826.7	2.6003e+06	2.30291e+06	2.23785e+06	1.29116	0.00221761	0.0215331	46.0227	5.52427	up
HX1332	C19H30O2	Roupelliol(ISO1)	Others	Others	-	3	2.57602e+06	1.88356e+06	2.32681e+06	2.27143e+07	2.05919e+07	2.12726e+07	1.28849	0.000385629	0.0107372	9.51592	3.25034	up
Lajn006059	C18H20O6	7,4'-Dihydroxy-8,2',3'-trimethoxyisoflavan	Flavonoids	Other Flavonoids	-	2	12601.1	20108	15995.9	2.9085e+06	2.04486e+06	3.49501e+06	1.29059	0.0218842	0.0638194	173.46	7.43846	up
mws0058	C16H12O6	Diosmetin (5,7,3'-Trihydroxy-4'-methoxyflavone)*	Flavonoids	Flavones	520-34-3	1	724399	712156	655208	1.32577e+07	1.2369e+07	1.02903e+07	1.29248	0.00600297	0.0321131	17.1706	4.10187	up
Wbtn007603	C16H12O6	9,11-dimethoxy-2h-[1,3]dioxolo[4,5-b]xanthen-10-one	Flavonoids	Other Flavonoids	-	1	888784	759620	679425	1.21831e+07	1.11275e+07	1.04875e+07	1.29165	0.00194317	0.0206247	14.5192	3.85989	up
Lmtn002796	C21H22O11	Aromadendrin-7-O-glucoside	Flavonoids	Flavanonols	28189-90-4	2	9	9	9	159830	143947	222759	1.29313	0.0182868	0.0575759	19501.4	14.2513	up
Lmtn002916	C22H20O14	Mearnsetin-3-O-glucuronide	Flavonoids	Flavones	-	3	12814.9	22247.2	25974.5	1.09086e+06	927483	732793	1.28438	0.0129656	0.0468181	45.0735	5.49421	up
pmn001706	C30H48O4	2,3-Dihydroxyolean-12-en-28-oic acid (2-Hydroxyoleanolic acid)*	Terpenoids	Triterpene	26707-60-8	2	86880.6	64125.4	57071.7	2.20782e+07	1.88527e+07	1.80522e+07	1.29261	0.00391975	0.0255256	283.466	8.14703	up
Lmzn206284	C30H48O4	3,13-Dihydroxylup-20(29)-en-28-oic acid (Terminic acid)	Terpenoids	Triterpene	-	2	86880.6	64125.4	57071.7	2.20782e+07	1.88527e+07	1.80522e+07	1.29261	0.00391975	0.0255256	283.466	8.14703	up
Yazn005837	C16H26O7	Boschnaside	Terpenoids	Monoterpenoids	-	1	77909.3	83863.8	76592.3	9	9	9	1.29354	0.000791814	0.0142093	0.000113272	-13.1079	down
pme3250	C16H12O5	Biochanin A	Flavonoids	Isoflavones	491-80-5	1	20466.8	29376.5	12781.1	292407	312813	262031	1.27509	0.00136107	0.016911	13.8484	3.79165	up
Sayn008823	C30H22O8	pauferrol C	Terpenoids	Ditepenoids	-	2	31451.5	23971.5	23624.6	3.32315e+06	3.21514e+06	3.99061e+06	1.292	0.004808	0.0287857	133.197	7.05742	up
MWSHC20155	C10H8O4	Scopoletin (7-Hydroxy-6-methoxycoumarin)	Lignans and Coumarins	Coumarins	92-61-5	1	1.63005e+07	2.03486e+07	1.60986e+07	3.24318e+06	3.91805e+06	2.95878e+06	1.2813	0.00738571	0.034576	0.191857	-2.3819	down
Zbln008072	C16H12O4	2-acetyl-7-methoxy-3H-benzo[f]chromen-3-one	Lignans and Coumarins	Coumarins	-	1	22787.7	27238.5	26489.6	3.00769e+06	2.14845e+06	4.41742e+06	1.28889	0.0409844	0.0985586	125.119	6.96715	up
Lacp005409	C17H14O5	MelimesSanol C	Lignans and Coumarins	Coumarins	-	1	197457	174791	170407	4.64679e+07	3.79045e+07	4.64977e+07	1.29346	0.00430421	0.0269488	241.166	7.91388	up
Smpn009230	C30H48O5	2,3,23-Trihydroxyolean-12-en-28-oic acid*	Terpenoids	Triterpene	-	3	1.68238e+06	1.32959e+06	1.4343e+06	1.36726e+08	1.14942e+08	1.20838e+08	1.29297	0.00279386	0.0229567	83.7796	6.38853	up
Wbmn009702	C30H48O5	2,3,23-Trihydroxyurs-12-en-28-oic acid*	Terpenoids	Triterpene	-	3	1.68238e+06	1.32959e+06	1.4343e+06	1.36726e+08	1.14942e+08	1.20838e+08	1.29297	0.00279386	0.0229567	83.7796	6.38853	up
MWSHC20168	C7H6O4	Methyl cumalate	Phenolic acids	Phenolic acids	6018-41-3	1	7.78607e+07	7.48537e+07	8.78496e+07	9.83584e+06	8.25761e+06	1.16281e+07	1.28683	0.00193976	0.0206247	0.123549	-3.01684	down
Qmjp081206	C15H20O2	Isogermafurenolide	Terpenoids	Sesquiterpenoids	-	1	1.29833e+07	1.3773e+07	1.16427e+07	556314	866288	472619	1.28466	0.00192304	0.0206247	0.0493559	-4.34063	down
Yxxp005044	C20H20O6	Balanophonin	Lignans and Coumarins	Lignans	118916-57-7	3	2.27692e+07	1.97495e+07	2.14207e+07	3.4921e+06	4.14162e+06	3.85248e+06	1.29197	0.00170149	0.0189046	0.179642	-2.4768	down
Lamp007647	C15H12O4	2',4,4'-Trihydroxychalcone*	Flavonoids	Chalcones	-	1	1.58416e+06	1.44328e+06	1.11737e+06	2.70197e+07	2.57984e+07	3.50496e+07	1.28846	0.010506	0.0413509	21.1994	4.40595	up
Wasn005621	C17H30O8	Glucosyl 9-hydroxy-3-methyldec-2-enoic acid	Others	Others	-	3	115811	30156.4	36548.9	1.21519e+06	1.13769e+06	1.06444e+06	1.24769	0.000107112	0.00638354	18.7234	4.22677	up
mws0612	C10H12O4	3,4-Dimethoxyphenyl acetic acid	Phenolic acids	Phenolic acids	93-40-3	2	1.90695e+06	1.67194e+06	2.28323e+06	2.99502e+07	2.66257e+07	2.56861e+07	1.28958	0.00219828	0.0214355	14.0328	3.81073	up
mws2212	C9H8O4	Caffeic acid	Phenolic acids	Phenolic acids	331-39-5	1	6.70318e+06	4.89253e+06	6.71031e+06	1.40489e+06	967125	759823	1.25803	0.00889763	0.0382104	0.171082	-2.54724	down
Yalp008047	C19H30O2	Methyl 12-phenyldodecanoate	Lipids	Free fatty acids	38795-65-2	1	2.87386e+06	2.04964e+06	2.53563e+06	22873547	2.18232e+07	2.35452e+07	1.28736	6.49541e-05	0.00516616	9.14878	3.19358	up
Zmhn003257	C16H12O6	5,7,2'-Trihydroxy-8-methoxyflavone*	Flavonoids	Flavones	-	1	848168	845375	762427	1.3e+07	1.11035e+07	1.02489e+07	1.29281	0.00574934	0.0316376	13.9873	3.80605	up
Zmdn007764	C15H10O5	isoemodin	Quinones	Anthraquinone	-	1	135465	743156	124445	5.05648e+06	3.26385e+06	2.99707e+06	1.19367	0.0249802	0.0705738	11.2828	3.49605	up
Lsjp211254	C30H46O	Lupa-1,20(29)-dien-3-one (Glochidone)	Terpenoids	Triterpene	-	1	738648	315350	148296	6.58755e+06	9.62565e+06	7.51871e+06	1.23884	0.0116521	0.0435024	19.7388	4.30297	up
mws0668	C10H12N4O6	Xanthosine	Nucleotides and derivatives	Nucleotides and derivatives	146-80-5	1	247135	173202	285865	3.56525e+06	1.97459e+06	2.83595e+06	1.27321	0.030297	0.0809345	11.8603	3.56807	up
Lmmp004504	C15H10O6	2'-Hydroxygenistein	Flavonoids	Isoflavones	1156-78-1	1	620455	655802	469650	2.55854e+07	2.38348e+07	2.14289e+07	1.29238	0.00267514	0.0229567	40.5801	5.3427	up
mws0474	C12H22O4	Dodecanedioic aicd	Lipids	Free fatty acids	693-23-2	1	254945	355097	231220	1.93316e+06	1.70356e+06	1.6686e+06	1.28305	0.000732609	0.0139232	6.30638	2.65681	up
Lmmn003663	C14H18O9	5-Glucosyloxy-2-Hydroxybenzoic acid methyl ester	Phenolic acids	Phenolic acids	-	3	7.76148e+06	5.03409e+06	6.8929e+06	80713.6	79406.8	129386	1.28898	0.0150957	0.0504021	0.0147044	-6.08761	down
MWSHY0159	C15H10O4	6,2'-Dihydroxyflavone	Flavonoids	Flavones	92439-20-8	2	24768.8	66253.5	55256.5	315297	285135	355655	1.23557	0.000948917	0.01543	6.53606	2.70842	up
Lmmn009170	C30H48O3	3-Hydroxy-9,19-cyclolanost-24-en-26-oic acid (Mangiferolic acid)	Terpenoids	Triterpene	4184-34-3	3	66903.5	53256	59567.7	443807	271872	273023	1.27005	0.0414799	0.0993661	5.50113	2.45973	up
pmb3023	C21H22O11	Eriodictyol-8-C-glucoside	Flavonoids	Flavanones	1023271-51-3	3	15119.4	30081.7	25966.6	171513	133032	211499	1.25777	0.0193572	0.0598054	7.25108	2.8582	up
mws0180	C7H6O4	2,5-Dihydroxybenzoic acid; Gentisic Acid*	Phenolic acids	Phenolic acids	490-79-9	1	8.41597e+07	8.91808e+07	1.00919e+08	1.18722e+07	1.30121e+07	1.6771e+07	1.28592	0.00218691	0.0214355	0.151883	-2.71897	down
Lmhn005110	C16H12O6	Aracarpene 1	Flavonoids	Isoflavones	1261245-78-6	2	616966	659754	602882	1.3186e+07	1.08418e+07	1.08867e+07	1.29353	0.00488773	0.0288888	18.5754	4.21532	up
HJAP140	C17H14O5	Puerol A	Phenolic acids	Phenolic acids	152784-32-2	1	146728	203835	192203	5.05084e+07	3.97964e+07	4.92295e+07	1.29303	0.00527229	0.0300861	257.08	8.00607	up
pmp000106	C18H16O5	5,7,4'-Trimethoxyflavone	Flavonoids	Flavones	5631-70-9	2	167685	164552	141139	3.72881e+06	4.32818e+06	6.23763e+06	1.28684	0.0259026	0.0724709	30.1972	4.91634	up
ZbLn005207	C12H22O9S	Sulfatricalysine C	Others	Saccharides	-	1	243773	383601	348781	1.69105e+07	1.24964e+07	1.65651e+07	1.29006	0.0087659	0.0378654	47.095	5.5575	up
mws0566	C7H8O2	4-Methylcatechol	Phenolic acids	Phenolic acids	452-86-8	3	13340	25876.1	47040.5	251004	196474	239734	1.22524	0.00134179	0.0167614	7.96707	2.99405	up
MWSslk117	C9H6O3	7-Hydroxy-4-chromone	Others	Chromone	59887-89-7	1	98087.9	120300	153231	3.04317e+06	2.2924e+06	2.44333e+06	1.28792	0.00826962	0.0366113	20.9324	4.38767	up
HJN098	C42H68O13	Azukisaponin I	Terpenoids	Triterpene Saponin	82793-02-0	2	786524	657454	593308	1.03331e+07	1.11597e+07	8.06239e+06	1.2881	0.00982667	0.0401985	14.5071	3.85869	up
Lmxn007456	C18H16O8	Acerosin	Flavonoids	Flavones	15835-74-2	1	1.43286e+07	1.62889e+07	1.33987e+07	1.89917e+06	2.21967e+06	1.96757e+06	1.29	0.00410526	0.0263535	0.138276	-2.85437	down
Wcdn003654	C13H14O7	Feruloyl Lactate	Organic acids	Organic acids	-	1	572936	725100	655827	7.09484e+06	6.31111e+06	6.482e+06	1.29216	0.00115614	0.0158885	10.1788	3.34749	up
Lmyn006227	C15H10O5	Galangin (3,5,7-Trihydroxyflavone)	Flavonoids	Flavones	548-83-4	3	49636.8	54371.8	45696.9	2.53651e+06	2.27314e+06	2.25885e+06	1.29385	0.00151739	0.0177177	47.216	5.5612	up
mws0038	C17H14O6	5,4'-Dihydroxy-3,7-dimethoxyflavone(Kumatakenin)	Flavonoids	Flavonols	3301-49-3	1	91499.4	69975.2	52282.7	584054	509438	471206	1.27698	0.00255837	0.0229567	7.31997	2.87184	up
MWS20151	C15H10O5	Apigenin; 4',5,7-Trihydroxyflavone	Flavonoids	Flavones	520-36-5	1	15020.6	23161.5	22723.1	1.06185e+06	970597	1.07478e+06	1.29071	0.000974689	0.01543	51.0175	5.67292	up
Wbtn006721	C15H10O6	6,8-dihydroxy-3-methyl-9-oxoxanthene-1-carboxylic acid	Others	Ketone compounds	-	1	74788.8	35453.8	56871.7	3.33966e+06	2.8663e+06	2.86395e+06	1.28499	0.00271293	0.0229567	54.2737	5.76218	up
Zmyn004943	C17H28O2	Norlinolenic acid	Lipids	Free fatty acids	-	3	85172.2	67758.6	91939.9	686277	540370	546915	1.28461	0.00752807	0.0347426	7.24285	2.85656	up
Hmcn003273	C15H20O3	Reynosin	Terpenoids	Sesquiterpenoids	28254-53-7	2	8.38958e+06	1.72649e+07	1.82604e+07	1.72914e+06	979150	540178	1.22889	0.0480683	0.111197	0.073972	-3.75688	down
MWS3166	C18H35NO3	N-Palmitoylglycine	Amino acids and derivatives	Amino acids and derivatives	2441-41-0	2	186405	231763	175510	2.50336e+06	1.75314e+06	1.62691e+06	1.28534	0.0228662	0.065808	9.9101	3.3089	up
NK10256198	C15H10O6	3,5,7,2'-Tetrahydroxyflavone; Datiscetin	Flavonoids	Flavones	480-15-9	2	39525.5	440007	54211.2	3.60383e+06	2.25316e+06	1.97447e+06	1.17521	0.0333287	0.0857712	14.6727	3.87506	up
Lssp210188	C20H24O7	(7'R)-7'-Hydroxylariciresinol	Others	Others	-	1	4.15048e+06	4.23806e+06	4.30586e+06	729451	762350	858064	1.29227	6.84499e-07	0.000808308	0.18511	-2.43354	down
Cmpp008728	C15H14O3	Lettucenin B	Terpenoids	Sesquiterpenoids	1609479-06-2	3	52568.6	115164	159001	1.02049e+06	829723	695050	1.2321	0.0100381	0.0406272	7.79003	2.96163	up
Zjhp090604	C16H14O5	5,7-dihydroxy-3-(4'-hydroxybenzyl)-chroman-4-one	Flavonoids	Other Flavonoids	-	1	1.88971e+07	1.98319e+07	1.50457e+07	2.68162e+06	3.1137e+06	3.97116e+06	1.27684	0.00684277	0.0342287	0.181618	-2.46102	down
MWSHC2099	C27H26O11	Salcolin A*	Flavonoids	Flavones	369390-51-2	3	2.45774e+06	398345	595366	6.63101e+06	5.30233e+06	7.36193e+06	1.1303	0.00415175	0.0265781	5.59048	2.48297	up
Qahn003953	C12H22O6	Erigeside B	Others	Others	95632-87-4	2	362192	402402	182333	2.06178e+06	1.74228e+06	1.52618e+06	1.24582	0.004679	0.0284557	5.62899	2.49288	up
MWSHY0103	C25H22O10	Silibinin	Flavonoids	Flavanonols	22888-70-6	3	16930.3	57671.3	37560.1	439421	295686	359791	1.2381	0.0110212	0.042239	9.76178	3.28714	up
Lmdp005525	C17H14O5	Afrormosin (6,4'-Dimethoxy-7-Hydroxyisoflavone)	Flavonoids	Isoflavones	550-79-8	2	226793	157257	216947	4.87638e+07	3.74896e+07	4.70929e+07	1.29179	0.00624218	0.0326754	221.875	7.7936	up
Lmsn010604	C30H46O6	2,3,19-Trihydroxyurs-12-en-23-formyl-28-oic Acid	Terpenoids	Triterpene	-	2	3941.73	6587.46	2550.27	350086	258662	268491	1.28499	0.0098742	0.0401985	67.0701	6.0676	up
Smpn011792	C30H48O4	2,3-Dihydroxy-12-ursen-28-oic acid	Terpenoids	Triterpene	-	3	105772	97448.9	72946.6	2.16539e+07	1.95106e+07	1.75762e+07	1.29301	0.00362979	0.0253427	212.7	7.73267	up
Hmjn003948	C30H48O5	2,3,6-Trihydroxyurs-12-en-28-oic acid (Madasiatic acid)*	Terpenoids	Triterpene	26532-66-1	3	18444.4	24103	12682.3	7.48604e+06	6.00809e+06	7.0157e+06	1.29224	0.00406144	0.0262179	371.355	8.53666	up
mws0376	C4H4O4	Fumaric acid	Organic acids	Organic acids	110-17-8	3	1.76078e+06	1.72575e+06	1.61725e+06	321688	173700	232191	1.26849	1.81135e-05	0.00465114	0.142557	-2.81039	down
Lmhn003801	C25H24O13	Feruloylsinapoyltartaric acid	Phenolic acids	Phenolic acids	-	2	8542.27	10099.4	7586.37	54886.4	63134.9	42110.8	1.27872	0.0171386	0.0549295	6.10539	2.61008	up
MWSHC20189	C20H22O6	Epipinoresinol*	Lignans and Coumarins	Lignans	24404-50-0	3	3.17477e+07	2.84367e+07	3.46628e+07	5.3014e+06	7.09184e+06	5.75376e+06	1.28683	0.0027133	0.0229567	0.191329	-2.38587	down
MWSHY0032	C16H12O4	Formononetin (7-Hydroxy-4'-methoxyisoflavone)	Flavonoids	Isoflavones	485-72-3	1	217849	285962	259318	2.18349e+07	1.50094e+07	2.90854e+07	1.28888	0.0332631	0.0856979	86.394	6.43286	up
mws0097	C20H22O6	Pinoresinol*	Lignans and Coumarins	Lignans	487-36-5	3	3.16954e+07	2.70062e+07	3.27555e+07	4.81582e+06	6.95836e+06	5.37109e+06	1.28351	0.00217387	0.0214355	0.187468	-2.41529	down
Lmzn006284	C30H48O4	2-Hydroxyursolic acid*	Terpenoids	Triterpene	-	2	26715.7	17039.1	26398.9	5.45787e+06	5.82227e+06	5.32588e+06	1.29079	0.000720883	0.0139232	236.709	7.88697	up
pmb0745	C26H24O10	Tricin-4'-O-syringyl alcohol	Flavonoids	Flavones	-	3	328026	95085.3	105083	2.78247e+06	2.30259e+06	2.72854e+06	1.24491	0.000816632	0.0142093	14.7931	3.88685	up
Wayn004064	C21H16O14	3'-O-Methylellagic acid-4-O-glucuronide	Tannins	Tannin	-	2	28281.1	26675	37579.2	253144	214459	191649	1.28215	0.00725329	0.0344684	7.12432	2.83275	up
Wcfn006909	C17H14O7	(2Z)-4,6-Dihydroxy-2-[(4-Hydroxy-3,5-Dimethoxyphenyl)Methylidene]-1-Benzofuran-3-One	Others	Others	-	3	304986	274570	229370	3.53424e+06	2.96997e+06	3.26427e+06	1.29113	0.00256388	0.0229567	12.0759	3.59405	up
Lasp008336	C26H22O8	Butesuperin A	Flavonoids	Isoflavones	-	1	45850.1	25894.1	30729	1.61919e+06	1.03483e+06	1.76678e+06	1.28394	0.0231989	0.0665997	43.1411	5.43099	up
mws0715	C13H16N2O4	Phenylacetyl-L-glutamine	Amino acids and derivatives	Amino acids and derivatives	28047-15-6	3	97853.6	102776	127851	853246	575002	573551	1.27724	0.0257128	0.0721144	6.09411	2.60742	up
Wmzn006169	C30H48O4	3,16-Dihydroxyolean-12-en-28-oic acid (Echinocystic acid)	Terpenoids	Triterpene	510-30-5	3	7908.95	5377.86	7795.63	5.80871e+06	4.99141e+06	4.32297e+06	1.29217	0.00720457	0.0344684	717.331	9.48649	up
Wbmn009545	C34H50O7	2,3-Diacetoxy-18-hydroxyoleana-5,12-dien-28-oic acid	Terpenoids	Triterpene	-	3	72467.5	53419	74953.5	2.67249e+06	1.80505e+06	2.43751e+06	1.28871	0.0130852	0.0471022	34.4306	5.10562	up
ML10198895	C3H7NO2	N-Methylglycine	Amino acids and derivatives	Amino acids and derivatives	107-97-1	3	11275.3	10838.1	19071	91007.9	119556	85819.6	1.26276	0.0110113	0.042239	7.19649	2.84729	up
pmp000344	C15H10O5	3',4',7-Trihydroxyflavone	Flavonoids	Flavones	2150-11-0	1	462936	470563	442840	1.53083e+07	1.48131e+07	1.35019e+07	1.29373	0.00145801	0.0174583	31.6952	4.98619	up
Wagp008369	C20H20O9	5,3'-Dihydroxy-3,6,7,4',5'-Pentamethoxyflavone*	Flavonoids	Flavones	-	2	18498.2	9970.98	9768.57	712839	753154	801046	1.28627	0.00103719	0.0155917	59.288	5.88967	up
Lmhp005784	C24H28N2O5	p-Coumaroylferuloylcadaverine	Alkaloids	Phenolamine	-	3	50150.9	33630.6	43170.7	838203	885607	674844	1.2868	0.00678687	0.0340543	18.8942	4.23987	up
mws0183	C7H6O4	3,4-Dihydroxybenzoic acid (Protocatechuic acid)*	Phenolic acids	Phenolic acids	99-50-3	1	6.31476e+06	6.94273e+06	7.89593e+06	821720	652069	921000	1.28541	0.00440224	0.0273483	0.113211	-3.14292	down
Zmcn009787	C30H46O4	23-Hydroxy-3-oxoolean-12-en-28-oic acid (Hederagonic acid)	Terpenoids	Triterpene	466-01-3	3	1027.44	8026.96	1819.1	38130	31662.7	35031	1.17987	0.000480283	0.0119563	9.64031	3.26908	up
Hajp008429	C17H16O5	4',5-dihydroxy-7-methoxy-6-methylfavanone	Flavonoids	Flavones	-	1	4.52338e+07	4.99115e+07	4.15301e+07	7.36992e+06	8.42149e+06	8.06652e+06	1.29006	0.00366977	0.0253481	0.174559	-2.51821	down
zjzp121605	C15H20O2	(1S,4R)-7-hydroxycalamenen-3-one	Terpenoids	Sesquiterpenoids	-	3	1.52523e+07	1.58213e+07	1.33342e+07	1.78388e+06	1.10716e+06	564333	1.2491	0.0006685	0.0136717	0.0778102	-3.6839	down
Qatp009522	C15H20O2	Dehydrosaussurea lactone	Terpenoids	Sesquiterpenoids	-	1	1.52523e+07	1.58213e+07	1.33342e+07	1.78388e+06	1.10716e+06	564333	1.2491	0.0006685	0.0136717	0.0778102	-3.6839	down
Wbwn006953	C20H18O5	Cagayanone A	Lignans and Coumarins	Lignans	-	1	8.49827e+06	1.73097e+07	1.16958e+07	633324	1.70054e+06	936078	1.24713	0.0454631	0.106341	0.0871896	-3.5197	down
Zblp004832	C15H12O4	7,4'-Dihydroxydihydroflavonoids	Flavonoids	Flavanones	-	1	348441	281740	241576	1.20122e+07	1.07093e+07	1.58814e+07	1.2893	0.0148796	0.0503138	44.2817	5.46864	up
pme0088	C15H10O6	Luteolin (5,7,3',4'-Tetrahydroxyflavone)	Flavonoids	Flavones	491-70-3	2	127682	102192	145283	3.88714e+06	3.45886e+06	3.40376e+06	1.29043	0.00183381	0.0198964	28.6542	4.84067	up
pmn001708	C30H48O5	2,3,23-Trihydroxyurs-12-en-28-oic acid (Asiatic acid)	Terpenoids	Triterpene	464-92-6	3	9478.88	6893.08	5517.56	67045	67850.7	54514	1.27867	0.00374067	0.025408	8.65298	3.1132	up
Zbqn004234	C12H13NO5	N-(malonyl)phenylalanine	Amino acids and derivatives	Amino acids and derivatives	-	1	9	9	9	541173	497359	543679	1.29372	0.000812212	0.0142093	58600.4	15.8386	up
pmb3068	C16H18O8	1-O-p-Coumaroylquinic acid*	Phenolic acids	Phenolic acids	-	2	1.77372e+06	1.08892e+06	1.81586e+06	94018.4	131429	409430	1.19285	0.017405	0.0554798	0.135701	-2.88149	down
MWS2910	C10H15N3O4	5-Methyl-2'-Deoxycytidine	Nucleotides and derivatives	Nucleotides and derivatives	838-07-3	3	91826	258420	157599	2.20479e+06	2.71796e+06	2.66356e+06	1.26465	0.0026035	0.0229567	14.9383	3.90094	up
Lmsn003588	C17H14O5	Pterocarpine	Flavonoids	Isoflavones	524-97-0	3	249612	257153	247283	3.36357e+07	3.34312e+07	4.23824e+07	1.29285	0.00656501	0.0334418	145.149	7.18139	up
Zmmp002946	C14H18N2O5	(3-(carboxyamino)-2-methylpropanoyl)phenylalanine	Amino acids and derivatives	Amino acids and derivatives	-	1	902344	99712.1	742825	9.73724e+06	8.12523e+06	1.15828e+07	1.17466	0.00844276	0.036953	16.8752	4.07683	up
Sayn009123	C30H22O8	pauferrol B	Terpenoids	Ditepenoids	-	2	48712	32297	36831.8	5.89708e+06	6.23196e+06	8.44243e+06	1.29016	0.0134386	0.0478529	174.57	7.44766	up
MA10014775	C6H6O2	Hydroquinone	Phenolic acids	Phenolic acids	123-31-9	2	1.2252e+06	1.2769e+06	1.54892e+06	176924	194583	226166	1.28838	0.00663203	0.0334642	0.147537	-2.76086	down
pme0368	C27H30O14	Apigenin-7-O-rutinoside (Isorhoifolin)*	Flavonoids	Flavones	552-57-8	3	10005	31675	17922.4	135070	106710	182203	1.22143	0.024126	0.0685383	7.11353	2.83057	up
mws0048	C21H20O10	Apigenin-8-C-Glucoside (Vitexin)*	Flavonoids	Flavones	3681-93-4	1	803400	606930	659139	6.2819e+06	1.10957e+07	7.51746e+06	1.27565	0.0339712	0.0868444	12.0297	3.58853	up
MWS201447	C12H16N2O3	Phe-Ala	Amino acids and derivatives	Amino acids and derivatives	3918-87-4	2	141396	79964.4	176690	847771	547863	609971	1.22873	0.0203032	0.0613342	5.03856	2.33301	up
pmc1990	C17H16O5	4'-Hydroxy-5,7-dimethoxyflavanone	Flavonoids	Flavanones	-	3	7.62563e+07	7.15251e+07	5.62841e+07	1.0488e+07	1.2158e+07	1.11815e+07	1.28544	0.0107069	0.0415858	0.165768	-2.59276	down
Zbdp007428	C17H12O6	3-Methoxy-7-hydroxy-3',4'-methylenedioxyflavone	Flavonoids	Other Flavonoids	-	2	27060.1	55015	35290.3	2.99901e+06	2.02114e+06	2.55217e+06	1.28795	0.0126339	0.0461444	64.5192	6.01166	up
pme0026	C6H14N2O2	L-Lysine	Amino acids and derivatives	Amino acids and derivatives	56-87-1	1	142040	20552.5	138882	1.05456e+06	986483	925003	1.15276	8.70922e-05	0.00591971	9.8385	3.29844	up
Hmjn008136	C30H46O4	2,3-Dihydroxyoleana-11,13(18)-dien-28-oic acid (Camaldulenic acid)	Terpenoids	Triterpene	71850-15-2	2	343169	308283	959364	2.92868e+06	2.68844e+06	2.52035e+06	1.19101	0.00242196	0.0225028	5.05177	2.33679	up
Hmlp005443	C15H10O4	6,7-Dihydroxyflavone	Flavonoids	Flavones	38183-04-9	1	366923	413726	352934	3.09418e+07	2.68483e+07	3.43777e+07	1.29323	0.00510176	0.0296981	81.3067	6.3453	up
Wbtn007637	C16H14O6	1-hydroxy-3,6,7-trimethoxyxanthen-9-one	Flavonoids	Other Flavonoids	-	2	19560.6	18700.1	33945.2	587478	500800	449738	1.28166	0.00608661	0.032373	21.3004	4.41281	up
MWSmce371	C15H20O3	Atractylenolide Ⅲ	Terpenoids	Sesquiterpenoids	73030-71-4	3	160967	272387	201585	40265.9	43620.9	21350.8	1.23602	0.0279336	0.0766682	0.165745	-2.59297	down
Lhmp122202	C16H12O5	stevenin	Lignans and Coumarins	Coumarins	36286-69-8	2	140836	168465	98685.8	2.64783e+07	2.08615e+07	2.66498e+07	1.29208	0.00595201	0.0319886	181.353	7.50266	up
Zmdn001564	C14H18N2O5	γ-Glutamylphenylalanine	Amino acids and derivatives	Amino acids and derivatives	7432-24-8	1	103999	30388.2	93007.5	1.01244e+06	928755	1.42321e+06	1.23647	0.0188415	0.0588655	14.7955	3.88708	up
ZbWn003804	C12H26O6S	8-(methoxymethoxy)decyl hydrogen sulfate	Others	Others	-	2	1.09052e+06	1.30235e+06	1.18856e+06	8.42599e+06	7.16351e+06	7.0485e+06	1.29128	0.00418582	0.0266601	6.32093	2.66014	up
Lmtn002565	C14H18O9	1-O-Vanilloyl-D-Glucose	Phenolic acids	Phenolic acids	-	3	8.45136e+06	5.13327e+06	6.59078e+06	52927.2	220175	107253	1.27077	0.0202984	0.0613342	0.0188524	-5.72911	down
MWS1882	C4H7NO4	Iminodiacetic acid	Organic acids	Organic acids	142-73-4	3	185150	36447.8	178682	1.18979e+06	1.443e+06	1.4198e+06	1.18335	0.000637403	0.0136717	10.1244	3.33976	up
Lmmp005689	C16H12O6	Cajanin	Flavonoids	Isoflavones	32884-36-9	1	40751.6	68208.7	73557.4	3.23881e+06	2.98629e+06	2.62207e+06	1.2879	0.00372775	0.025408	48.4729	5.59911	up
Lmtn002997	C22H22O13	Mearnsetin-3-O-glucoside	Flavonoids	Flavones	-	2	132172	105954	204400	6771.27	20470.9	25478.1	1.2088	0.0434365	0.102681	0.119135	-3.06933	down
Lmmp004600	C40H40O23	Tricin-7-O-[(2''-Sinapoyl)glucuronyl](2→1)glucuronide	Flavonoids	Flavones	-	2	30633	10005	42624.2	2.44221e+06	3.13539e+06	4.67511e+06	1.26608	0.0358406	0.090128	123.137	6.94413	up
Qmxp101615	C22H36O3	Ent-3β-Acetoxyisopimar-15-8β-ol	Terpenoids	Ditepenoids	-	1	5.83518e+06	5.26861e+06	5.68718e+06	4.7507e+07	4.25534e+07	3.73726e+07	1.29082	0.00609874	0.032373	7.58938	2.92398	up
mws1173	C15H12O5	Garbanzol	Flavonoids	Flavonols	1226-22-8	3	177878	183929	124604	1.48678e+06	1.21354e+06	1.45426e+06	1.28536	0.00355582	0.0252564	8.54129	3.09445	up
Lalp005180	C14H8O5	1,4,5-trihydroxyanthraquinone	Quinones	Anthraquinone	-	2	193094	201815	118013	892442	936804	919474	1.27015	0.000175983	0.00770203	5.35894	2.42195	up
MWSmce355	C10H12O5	Methyl Syringate	Phenolic acids	Phenolic acids	884-35-5	3	569881	613429	692189	97021.8	132862	100992	1.28519	0.00246353	0.0225028	0.17642	-2.50291	down
pme2853	C8H15NO3	Hexanoyl-L-glycine	Amino acids and derivatives	Amino acids and derivatives	24003-67-6	3	33089.4	89839.8	86700	384832	340136	329580	1.20894	0.000368475	0.0105129	5.03054	2.33071	up
Wbwn006662	C20H16O7	[2,5-Bis(1,3-benzodioxol-5-yl)-4-(hydroxymethyl)furan-3-yl]methanol	Lignans and Coumarins	Lignans	-	2	2.69774e+06	4.54088e+06	2.70954e+06	400544	629760	171206	1.20771	0.0363374	0.0906198	0.120777	-3.04958	down
Lakn005184	C24H34O12	1'S,4'S-4'-Dihydroabscisic acid-4′-O-β-malonylglucopyranoside	Terpenoids	Sesquiterpenoids	-	1	47485.3	97883.8	75975.8	2.34049e+06	2.19025e+06	2.27472e+06	1.28535	0.000107592	0.00638354	30.746	4.94233	up
Zblp005270	C16H14O4	4,4'-Dihydroxy-2-methoxychalcone; Echinatin	Flavonoids	Chalcones	34221-41-5	1	31305.4	55015	76280	372741	422951	643027	1.24402	0.0333775	0.0858014	8.84819	3.14538	up
MWS20182	C10H12O4	Dihydroferulic Acid	Phenolic acids	Phenolic acids	1135-23-5	2	361636	288783	424622	5.67271e+06	5.3742e+06	5.29783e+06	1.28822	0.000138775	0.00726026	15.2038	3.92636	up
Hmhp011220	C16H27NO4	10,11-Dihydroxy-N-(2-hydroxy-2-methylpropyl)-2,6,8-dodecatrienam-Ide	Alkaloids	Alkaloids	-	3	258345	357215	346160	47269.8	56464.9	84409	1.25958	0.00821387	0.0365044	0.195632	-2.35378	down
MWSHY0147	C15H10O4	Daidzein	Flavonoids	Isoflavones	486-66-8	2	165100	74338.9	165100	1.431e+06	1.16493e+06	1.41296e+06	1.25737	0.00228471	0.0219998	9.90976	3.30885	up
Lajp006981	C17H12O7	5,6-Dihydroxy-7-methoxy-3′,4′-dioxymethylene-flavonoid	Flavonoids	Flavones	-	2	17476.4	31899	30319.5	471977	538672	488314	1.28253	0.0011374	0.0158885	18.8088	4.23333	up
mws0145	C8H8O3	O-Anisic acid (2-Methoxybenzoic acid)	Phenolic acids	Phenolic acids	529-75-9	3	17995	27745.5	24381	336029	291219	301498	1.28828	0.00153675	0.0177177	13.2448	3.72736	up
Zmgp006231	C16H10O5	pseudobaptigenin	Flavonoids	Isoflavones	90-29-9	1	158395	155204	184233	1.98829e+07	1.53141e+07	2.15066e+07	1.29229	0.00964746	0.0401985	113.901	6.83164	up
Ymjm000099	C30H44O3	3-Oxooleana-11,13(18)-dien-28-oic acid	Terpenoids	Triterpene	-	2	26560	63920	75576.5	1.05214e+07	8.53882e+06	7.05471e+06	1.28318	0.0131972	0.0473173	157.265	7.29706	up
Zbdp006427	C16H12O5	7,8-Dihydroxy-4'-methoxyisoflavone	Flavonoids	Other Flavonoids	-	1	518100	1.23462e+06	404187	9.12486e+06	7.10532e+06	8.44992e+06	1.25381	0.00208648	0.0211761	11.4424	3.51631	up
MWS0631	C3H7NO5S2	S-Sulfo-L-Cysteine	Amino acids and derivatives	Amino acids and derivatives	1637-71-4	3	6014	1486.97	9139.51	307842	248193	251020	1.24598	0.00493484	0.0290929	48.4995	5.5999	up
pmb0725	C33H32O15	Tricin-7-O-(2''-feruloyl)glucoside	Flavonoids	Flavones	-	3	19836.6	6327.16	14927	233120	235144	225457	1.25632	3.54659e-06	0.00273205	16.8827	4.07747	up
pmp000661	C15H22O	Cryptomerione	Terpenoids	Sesquiterpenoids	5988-72-7	2	4.23683e+06	5.17731e+06	5.30665e+06	1.49784e+06	447662	377768	1.17923	0.0011496	0.0158885	0.157823	-2.66362	down
pme1228	C11H12N2O3	5-Hydroxy-L-tryptophan	Amino acids and derivatives	Amino acids and derivatives	4350-09-8	3	256194	139105	296009	3.48526e+06	3.12886e+06	2.39119e+06	1.2675	0.0118997	0.04393	13.0265	3.70337	up
Hamp007385	C17H16O5	5-hydroxy-7,8-dimethoxyflavanone	Others	Others	-	2	4.78989e+07	4.86111e+07	4.03019e+07	6.93874e+06	8.15256e+06	7.42006e+06	1.28934	0.00427425	0.0269488	0.164543	-2.60347	down
MWSmce085	C16H10O7	Wedelolactone	Lignans and Coumarins	Coumarins	524-12-9	3	63129.6	89494.3	178553	8.48244e+06	7.57435e+06	8.25803e+06	1.2804	0.000991824	0.0154437	73.4194	6.19809	up
Lmbp000668	C6H5NO2	Isonicotinic acid	Others	Vitamin	55-22-1	2	5.17372e+07	3.2005e+07	4.48801e+07	7.83361e+06	5.89602e+06	7.75844e+06	1.27105	0.0241092	0.0685383	0.167063	-2.58153	down
mws4053	C30H48O3	3-Hydroxyurs-12-en-28-oic acid (Ursolic acid)*	Terpenoids	Triterpene	77-52-1	2	66471	46134.3	60298	385436	250860	255348	1.2662	0.0303456	0.0809345	5.1569	2.3665	up
MWSHY0069	C16H12O6	Hispidulin (5,7,4'-Trihydroxy-6-methoxyflavone)	Flavonoids	Flavones	1447-88-7	3	523062	553207	581029	7.82804e+06	6.81905e+06	7.01117e+06	1.2933	0.00209188	0.0211761	13.0684	3.70801	up
Zjxp110324	C15H20O3	Isotelekin	Terpenoids	Sesquiterpenoids	-	3	532126	896182	996295	105045	37933	149014	1.19424	0.0318266	0.0831233	0.120429	-3.05375	down
MWS3020	C7H16N2O	N-Acetylcadaverine	Alkaloids	Alkaloids	32343-73-0	3	129125	1.83557e+06	145498	1.19898e+07	9.8352e+06	9.71276e+06	1.16462	0.000643535	0.0136717	14.9454	3.90163	up
Zbfn008708	C26H46O9	1-O-Linoleoyl-(6-O-Hydroxyethyl-D-Glucose)	Lipids	Free fatty acids	-	2	6559.47	11455.2	13556.9	65497	56651.5	46415.1	1.24702	0.00770694	0.0351991	5.3391	2.4166	up
Wbtn007183	C16H12O7	methyl 4,8-dihydroxy-6-methoxy-9-oxo-9H-xanthene-3-carboxylate	Flavonoids	Other Flavonoids	-	3	262700	273756	256648	1.80278e+06	1.74808e+06	1.55014e+06	1.29275	0.00274712	0.0229567	6.43171	2.6852	up
MWSHY0146	C16H12O5	Glycitein	Flavonoids	Isoflavones	40957-83-3	2	102686	172079	148744	6.17017e+06	5.01065e+06	6.57512e+06	1.28925	0.00644068	0.0330031	41.9257	5.38976	up
pme0241	C7H6O2	Benzoic acid	Phenolic acids	Phenolic acids	65-85-0	3	2.30277e+06	6.27421e+06	2.97426e+06	2.16729e+07	3.19946e+07	2.83524e+07	1.23511	0.00832528	0.0367354	7.10052	2.82793	up
Wbjp001169	C11H12N2O3	o-Carboxy-5-hydroxytryptamine	Alkaloids	Alkaloids	-	3	1.39933e+06	479824	1.52355e+06	8.71884e+06	6.46205e+06	6.0316e+06	1.19724	0.0106624	0.0415527	6.23401	2.64016	up
pmb3053	C27H24O11	Tricin-4'-O-eudesmic acid	Flavonoids	Flavones	-	3	32906.3	7991.83	17995.1	358717	335571	313861	1.24462	0.000167654	0.00770203	17.1183	4.09746	up
mws0219	C4H7NO4	L-Aspartic Acid	Amino acids and derivatives	Amino acids and derivatives	56-84-8	1	1.48792e+06	265477	1.33437e+06	9.55491e+06	1.16364e+07	1.28154e+07	1.18198	0.00360135	0.0252564	11.0134	3.46119	up
Lmhn003439	C17H20O9	Phellodenol H	Lignans and Coumarins	Coumarins	917092-48-9	1	2.17223e+06	1.32099e+06	2.69729e+06	238149	196951	451969	1.23112	0.0432566	0.102662	0.143295	-2.80294	down
MWSslk120	C11H13NO3	N-Acetyl-DL-phenylalanine	Amino acids and derivatives	Amino acids and derivatives	2901-75-9	1	10833985	23593545	10763955	82298865	78171360	66382780	1.23797	0.000737239	0.0139232	5.01982	2.32763	up
pmf0443	C15H20O3	Parthenolide	Terpenoids	Sesquiterpenoids	20554-84-1	3	68421.6	60529.3	62303.9	618585	496459	539508	1.29178	0.00517169	0.029844	8.65103	3.11287	up
Qmgp082708	C26H30O7	Obacunone(ISO)	Terpenoids	Ditepenoids	-	3	32546.1	13004.3	32909.4	943533	996617	1.1264e+06	1.27312	0.00263337	0.0229567	39.0843	5.28852	up
Zmmp003443	C16H19N3O5	Bestim	Amino acids and derivatives	Amino acids and derivatives	66471-20-3	1	293662	55015	307740	2.52687e+06	2.00117e+06	3.09047e+06	1.18188	0.0133902	0.0478281	11.6062	3.53683	up
Zmdp002216	C11H20N2O5	L-γ-Glutamyl-L-leucine	Amino acids and derivatives	Amino acids and derivatives	2566-39-4	1	707979	112271	660666	1.23796e+07	8.72654e+06	1.36731e+07	1.21219	0.0160872	0.0522395	23.485	4.55367	up
Latp006670	C15H20O3	Telekin*	Terpenoids	Sesquiterpenoids	6752-90-5	3	774683	1.06935e+06	649370	210458	172903	41868.8	1.13072	0.0192769	0.0596371	0.170541	-2.55181	down
Ybmn004904	C7H6O3	p-hydroxy-benzoic acid	Phenolic acids	Phenolic acids	-	1	2.60858e+06	2.95883e+06	2.41987e+06	1.3445e+07	1.47957e+07	1.33429e+07	1.28995	0.000659324	0.0136717	5.20622	2.38024	up
Lmmp004510	C38H36O21	Apigenin-7-O-[2''-O-(2'''-Sinapoyl)glucuronyl]glucuronide	Flavonoids	Flavones	-	2	14941.6	10005	6670	1.78023e+06	1.48073e+06	1.75525e+06	1.28883	0.00330141	0.0244076	158.658	7.30977	up
Zmzp000145	C9H20N2O2	Trimethyllysine	Amino acids and derivatives	Amino acids and derivatives	23284-33-5	2	816201	109669	672041	1.00255e+07	8.91542e+06	1.12912e+07	1.19721	0.00269862	0.0229567	18.9198	4.24182	up
pmp000567	C17H16O5	Melilotocarpan A	Phenolic acids	Phenolic acids	61135-95-3	2	220443	115878	105061	1.46824e+07	1.15562e+07	1.69028e+07	1.28593	0.0116291	0.0435024	97.7419	6.61091	up
Jmcn005419	C21H36O7	pterodontoside G	Terpenoids	Sesquiterpenoids	-	3	89920.9	58825.3	106516	1.34424e+06	1.17404e+06	1.0839e+06	1.27993	0.00367443	0.0253481	14.1117	3.81882	up
mws1078	C7H7NO2	Anthranilic Acid	Phenolic acids	Phenolic acids	118-92-3	3	458170	118390	227364	1.96552e+06	1.76224e+06	1.90407e+06	1.20829	0.000516716	0.0123106	7.00543	2.80847	up
Hasp010605	C21H36O4	(S)-2,3-dihydroxypropyl (9Z,12Z,15Z)-octadeca-9,12,15-trienoate	Others	Others	129828-41-7	3	311053	268402	203536	1.57588e+06	1.61276e+06	1.43812e+06	1.28158	0.00014823	0.00744693	5.90908	2.56293	up
Ybhn010559	C29H46O4	3-Hydroxy-20-oxo-30-norlupan-28-oic acid (Platanic acid)	Terpenoids	Triterpene	6060-06-6	2	329448	98051.6	321902	6.31335e+06	5.38318e+06	4.36882e+06	1.24944	0.0107971	0.041866	21.4376	4.42207	up
MWSmce129	C15H20O2	Atractylenolide Ⅱ	Terpenoids	Sesquiterpenoids	73069-14-4	3	1.48626e+07	1.63766e+07	1.26513e+07	1.73661e+06	1.06703e+06	568105	1.25024	0.00349472	0.0251188	0.0768216	-3.70234	down
Lmgn013947	C30H48O4	2α,3α-Dihydroxyolean-12-en-28-oic acid	Terpenoids	Triterpene	26563-68-8	2	388623	444551	333852	5.69439e+06	5.85341e+06	4.39052e+06	1.28935	0.00850042	0.0371351	13.6572	3.77159	up
Walp004391	C15H16O7	7-C-Glucosylcoumarin	Lignans and Coumarins	Coumarins	-	3	74963.7	66685	121248	936164	846330	919282	1.27636	6.56561e-05	0.00516616	10.2769	3.36134	up
mws0041	C15H10O5	Baicalein	Flavonoids	Flavones	491-67-8	3	97213.2	68115.2	78098.2	460152	446478	361276	1.27814	0.00523812	0.0300379	5.20858	2.38089	up
pmp000235	C27H26O11	Salcolin B*	Flavonoids	Flavones	-	3	2.4614e+06	359092	619334	6.06198e+06	5.51557e+06	7.27935e+06	1.12037	0.00433702	0.0270158	5.48194	2.45469	up
Lskp211385	C20H20O6	(-)-dihydrosesamin	Lignans and Coumarins	Lignans	-	3	5.38858e+06	1.00603e+07	7.49523e+06	666552	1.42514e+06	988385	1.24848	0.036229	0.0906118	0.134242	-2.89709	down
Laxp008689	C16H12O4	(2Z)-6-hydroxy-2-(3-methoxybenzylidene)-1-benzofuran-3(2H)-one	Flavonoids	Other Flavonoids	1234351-88-2	1	302354	274265	309406	2.30336e+07	1.50236e+07	3.00224e+07	1.28826	0.0354486	0.0892393	76.8371	6.26373	up
Jmbp005389	C18H16O8	Thymonin (5,6,4'-Trihydroxy-7,8,3'-trimethoxyflavone)	Flavonoids	Flavones	76844-67-2	1	4.20994e+07	49293907	3.56961e+07	8.67486e+06	8.58746e+06	7.3354e+06	1.28015	0.0121831	0.044833	0.193547	-2.36925	down
Laxp007582	C16H16O5	7,2'‑dihydroxy‑4'‑methoxy‑isoflavanol	Flavonoids	Other Flavonoids	-	1	335701	458330	387631	1.17226e+07	9.82041e+06	1.01226e+07	1.29246	0.00326299	0.0244076	26.7975	4.74403	up
Lacp004731	C15H10O4	3-Hydroxy-1-methoxy-9,10-anthraquinone	Quinones	Anthraquinone	28504-24-7	2	133932	102534	130912	1.74144e+06	1.52588e+06	1.84386e+06	1.28921	0.00320123	0.0244076	13.9126	3.79832	up
pmb2795	C10H10O3	4-Methoxycinnamic acid	Phenolic acids	Phenolic acids	830-09-1	3	106567	151685	145828	1.27377e+06	1.26319e+06	1.41008e+06	1.28724	0.00072374	0.0139232	9.76797	3.28806	up
Wbsp008647	C30H48O2	3α-hydroxy-14-serraten-21-one	Terpenoids	Triterpene	-	3	592159	616013	450632	1.95779e+07	1.86931e+07	1.64972e+07	1.29223	0.00259644	0.0229567	33.0166	5.04512	up
mws0042	C15H14O7	Epigallocatechin	Flavonoids	Flavanols	970-74-1	3	23340	20005	13594.2	126349	135261	159004	1.27513	0.00377107	0.025408	7.38709	2.88501	up
mws1521	C13H18O7	Salicin	Phenolic acids	Phenolic acids	138-52-3	3	9	9	9	43586.5	29701.4	27428.1	1.29367	0.0218991	0.0638194	3730.22	11.865	up
MWSHY0176	C17H16O5	Farrerol (6,8-Dimethyl-5,7,4'-trihydroxyflavanone)	Flavonoids	Flavanones	24211-30-1	1	5.03706e+07	4.98726e+07	4.0808e+07	7.54052e+06	8.73623e+06	7.99633e+06	1.28837	0.00581915	0.0316376	0.172087	-2.53879	down
Wbjp001317	C11H10N2O2	vasicinone	Alkaloids	Alkaloids	486-64-6	3	3.04159e+06	975000	3.38488e+06	2.98954e+07	3.09364e+07	2.031e+07	1.22255	0.0148996	0.0503138	10.9629	3.45456	up
Smln006508	C16H10O7	Laccaic acid D	Quinones	Anthraquinone	18499-84-8	3	55233.9	109382	101159	1.54749e+06	1.12888e+06	1.07007e+06	1.27533	0.0154426	0.0509828	14.0963	3.81725	up
Smcp000882	C15H21NO7	N-benzoyl-2-aminoethyl-β-D-glucopyranoside	Alkaloids	Alkaloids	-	2	536773	287049	558036	2.62699e+06	2.04786e+06	2.7602e+06	1.24547	0.00550671	0.030756	5.38048	2.42773	up
Hmlp005624	C16H12O5	3',7-dihydroxy-4'-methoxyflavone	Flavonoids	Flavones	-	1	1163070	1.73526e+06	1.86428e+06	3.87719e+07	3.32287e+07	3.91898e+07	1.28803	0.00263965	0.0229567	23.3465	4.54513	up
Zmgp007333	C17H14O4	7,4'-Di-O-methyldaidzein	Flavonoids	Isoflavones	1157-39-7	1	25480.4	58739.4	30857	1.25174e+06	1.04324e+06	1.08122e+06	1.28213	0.00284127	0.0229685	29.3387	4.87473	up
Lssp210422	C15H10O5	Genistein	Flavonoids	Isoflavones	446-72-0	1	19997.7	20416.5	12011.9	1.15625e+06	1.04207e+06	1.01195e+06	1.29037	0.0016787	0.0187415	61.2342	5.93627	up
Jmcn007352	C15H22O3	5α-Hydroxycostic acid	Terpenoids	Sesquiterpenoids	-	3	4.99077e+06	4.98054e+06	6.37024e+06	748153	941770	570942	1.27749	0.00708275	0.0344684	0.138351	-2.8536	down
zjgp122007	C15H10O6	Maritimetin	Flavonoids	Aurones	576-02-3	3	563844	598589	491381	2.62942e+07	2.47053e+07	2.29392e+07	1.29359	0.00159745	0.0181858	44.708	5.48246	up
mws0920	C15H10O7	Tricetin (5,7,3',4',5'-Pentahydroxyflavone)	Flavonoids	Flavones	520-31-0	2	9	9	9	153620	204740	264087	1.29244	0.0228597	0.065808	23053.6	14.4927	up
MWS201434	C12H20N4O3	Ile-His	Amino acids and derivatives	Amino acids and derivatives	97284-12-3	1	1.2773e+06	664546	1.35808e+06	5.4222e+06	4.79402e+06	6.38165e+06	1.23723	0.00388201	0.0255256	5.02976	2.33049	up
Lamp007741	C26H22O9	Methoxy astrernestin	Others	Lactones	-	2	15547.2	22597.5	15151.4	408524	502286	676841	1.28493	0.0227352	0.0655943	29.7892	4.89672	up
MWS1837	C8H15NO2	Tranexamic Acid	Organic acids	Organic acids	1197-18-8	3	448964	596269	462124	3.87817e+06	3.74903e+06	4.01082e+06	1.28987	1.57682e-05	0.00465114	7.72082	2.94875	up
pme1373	C9H14N3O7P	2'-Deoxycytidine-5'-monophosphate	Nucleotides and derivatives	Nucleotides and derivatives	1032-65-1	3	27859.1	11969.2	19681.9	110229	82073.5	118479	1.23114	0.00858062	0.0372741	5.22232	2.38469	up
Wcgp010223	C18H28O2	3-(Cyclohexen-1-yl)-2-hydroxy-4a,5-dimethyl-2,3,4,5,6,7,8,8a-octahydronaphthalen-1-one	Others	Others	-	3	324631	217582	308982	1.69521e+06	1.54422e+06	1.73632e+06	1.27825	0.000175291	0.00770203	5.8456	2.54735	up
Wmbn000550	C22H32O5	Ajugarin V	Terpenoids	Ditepenoids	82231-14-9	3	20727.7	17195.9	17195.9	118500	83789.7	95125.5	1.28347	0.014683	0.0499975	5.39582	2.43184	up
Lmgn002679	C6H6O	Phenol	Phenolic acids	Phenolic acids	108-95-2	3	1.41597e+06	1.37811e+06	1.35246e+06	7.01087e+06	7.679e+06	7.02972e+06	1.29212	0.001312	0.0166672	5.23801	2.38902	up
Zmhp003514	C16H12O6	6,7,8-Tetrahydroxy-5-methoxyflavone	Flavonoids	Flavones	-	3	534408	519407	449028	7.71609e+06	6.40379e+06	6.62232e+06	1.29282	0.00386019	0.0255256	13.802	3.7868	up
Lamp006511	C17H16O6	Indigocarpan	Flavonoids	Other Flavonoids	-	2	13412.7	12064	47497.2	2.61676e+06	1.29615e+06	1.71278e+06	1.26437	0.0414921	0.0993661	77.0919	6.26851	up
pme1299	C8H8O5	DL-3,4-Dihydroxymandelic acid	Organic acids	Organic acids	775-01-9	3	603217	316119	618537	74347.5	86988.1	106183	1.25068	0.0488048	0.112407	0.173954	-2.52322	down
Qayp009909	C20H32O2	Kolavenic Acid	Terpenoids	Ditepenoids	25436-90-2	2	51563.8	31440.2	63911.5	407149	366667	353335	1.26461	0.000266286	0.00955347	7.6721	2.93962	up
MWSslk252	C28H34O14	Didymin (Isosakuranetin-7-O-rutinoside)*	Flavonoids	Flavanones	14259-47-3	3	60834	67273.9	8490.12	1.98743e+06	2.03536e+06	1.25445e+06	1.22592	0.0205887	0.0617274	38.6333	5.27177	up
MW0120419	C9H6N2	4-Cyanoindole	Alkaloids	Plumerane	16136-52-0	3	622377	484563	622466	16853.7	22798.3	15391.4	1.29065	0.00660707	0.0334418	0.0318279	-4.97356	down
MWSmce566	C17H16O5	Astrapterocarpan	Flavonoids	Other Flavonoids	73340-41-7	3	155152	285675	102748	9.54539e+06	1.01119e+07	8.59755e+06	1.2819	0.00200372	0.0209917	51.9797	5.69988	up
pmp000416	C16H12O5	3'-Methoxydaidzein	Flavonoids	Isoflavones	21913-98-4	3	9914.14	8955.14	22570.7	275740	221989	244603	1.26664	0.0025565	0.0229567	17.9134	4.16297	up
pme0490	C6H5NO2	Nicotinic acid (Vitamin B3)	Others	Vitamin	59-67-6	2	5.037e+07	3.19787e+07	4.1696e+07	7.0082e+06	5.08487e+06	7.29539e+06	1.27134	0.0209201	0.0622219	0.156302	-2.67759	down
pme0183	C5H5N5O	Isoguanine	Nucleotides and derivatives	Nucleotides and derivatives	3373-53-3	3	9	9	9	5.43203e+06	4.40076e+06	3.67079e+06	1.2938	0.0126393	0.0461444	500133	18.932	up
Zmsp002451	C11H15NO	5-Acetyl-2,3-dihydro-6,7-dimethyl-1H-pyrrolizine	Alkaloids	Pyrrole alkaloids	-	3	563037	649272	570923	4.34721e+06	4.73286e+06	4.76651e+06	1.29185	0.000741044	0.0139232	7.76488	2.95696	up
pme1611	C21H22O10	Isohemiphloin	Flavonoids	Flavanones	3682-02-8	3	48047.7	29078.5	61186.1	2.115e+06	2.55737e+06	2.27076e+06	1.28291	0.003117	0.0243879	50.1989	5.64958	up
Wafn002171	C12H14O11S	Dihydroxybenzoyl(2'-sulfate)xyloside	Phenolic acids	Phenolic acids	-	2	203786	136211	159051	9.70302e+06	1.01703e+07	8.69294e+06	1.29065	0.00212586	0.0211761	57.2415	5.83899	up
pme0193	C5H10N2O3	L-Glutamine	Amino acids and derivatives	Amino acids and derivatives	56-85-9	3	139700	19776.8	132277	751251	849255	955637	1.13835	0.000907743	0.015092	8.7613	3.13115	up
pmb0746	C27H26O11	Tricin-4'-O-(guaiacylglycerol)ether	Flavonoids	Flavones	-	3	2.35282e+06	404879	585274	6.2299e+06	4.74205e+06	7.28763e+06	1.12915	0.00727609	0.0344684	5.46208	2.44945	up
Zahp008538	C13H14O4	4-allyl-1,2-phenylene diacetate	Others	Others	-	2	81590.2	56770.7	76671.6	603537	580259	541489	1.28465	0.000276243	0.00955347	8.02336	3.00421	up
Laxp010715	C30H48O2	Abrisapogenol F	Terpenoids	Triterpene Saponin	-	1	8930.54	11414	8723.17	316270	278963	282798	1.29304	0.00166596	0.0186895	30.2063	4.91678	up
Zbzp002318	C15H27NO4	heliocurassavicine	Alkaloids	Pyrrole alkaloids	82354-34-5	2	562525	447749	476193	34793.1	29114.6	47800.6	1.28432	0.00473776	0.0286269	0.0751502	-3.73408	down
Lasp008178	C27H24O9	Butesuperin B	Flavonoids	Isoflavones	-	2	10858.7	21551.1	38095.3	603974	525059	698101	1.26264	0.00618068	0.0325972	25.9149	4.69571	up
Hmmn006338	C15H18O4	Armexifolin	Terpenoids	Sesquiterpenoids	64929-15-3	2	751820	408755	697147	41077	32032.8	43034.2	1.27965	0.0318894	0.0831233	0.0625196	-3.99955	down
Hmbp002730	C15H10O6	Isoscutellarein	Flavonoids	Flavones	41440-05-5	2	667827	629570	632817	2.58655e+07	2.36283e+07	2.30675e+07	1.29373	0.0013126	0.0166672	37.5924	5.23237	up
Hmgp002953	C29H32O17	Tricin-7-O-(2''-O-rhamnosyl)galacturonide	Flavonoids	Flavones	89915-54-8	3	22864.2	9702.18	30010	150085	116510	131735	1.21453	0.00144898	0.0174475	6.3655	2.67027	up
Qmqp102534	C15H20O2	Isoalantolactone	Terpenoids	Sesquiterpenoids	470-17-7	3	4.48776e+06	5.53349e+06	6.1206e+06	952088	1.0689e+06	821253	1.28206	0.0101254	0.040745	0.176079	-2.5057	down
MWSHY0080	C27H30O15	Luteolin-7-O-neohesperidoside (Lonicerin)*	Flavonoids	Flavones	25694-72-8	3	9	9	9	121671	137699	91977.7	1.29327	0.0128297	0.0465454	13012.9	13.6677	up
pmp000593	C27H30O15	Luteolin-7-O-rutinoside*	Flavonoids	Flavones	3563-98-2	3	9	9	9	121671	137699	91977.7	1.29327	0.0128297	0.0465454	13012.9	13.6677	up
mws0655	C8H10NO6P	Pyridoxal-5'-phosphate	Others	Vitamin	54-47-7	3	16950.7	4430.37	18489.8	88640.5	62831.9	61849.9	1.14371	0.0101377	0.040745	5.35033	2.41963	up
pme2527	C5H12N2O2	L-Ornithine	Amino acids and derivatives	Amino acids and derivatives	70-26-8	3	282605	44987.2	205823	1.09172e+06	762718	1.51231e+06	1.11124	0.0384939	0.0942368	6.31168	2.65803	up
Zaxn007436	C20H30O	Pimaradienone*	Terpenoids	Ditepenoids	-	2	92949.2	396672	97135.1	1.05478e+06	987169	1.00503e+06	1.16265	0.012138	0.0447383	5.19292	2.37655	up
Lmsp102219	C15H10O5	Aloe emodin	Quinones	Anthraquinone	481-72-1	1	329830	532524	483098	3.37205e+06	3.16189e+06	3.04471e+06	1.28082	6.41288e-05	0.00516616	7.11928	2.83173	up
Wagp008758	C20H20O9	5,4'-Dihydroxy-3,6,7,3',5'-Pentamethoxyflavone*	Flavonoids	Flavones	-	2	62216.9	23340	48345	810375	807601	892014	1.26653	0.000270722	0.00955347	18.745	4.22843	up
mws0052	C21H18O11	Baicalin*	Flavonoids	Flavones	21967-41-9	1	6947.63	21583.7	18401.7	455115	361451	407415	1.26701	0.0039024	0.0255256	26.0793	4.70484	up
pmb3045	C23H22O13	Tricin-7-O-Glucuronide	Flavonoids	Flavones	-	2	1721.16	13340	9	384706	391435	290051	1.07762	0.00782476	0.0354569	70.7486	6.14463	up
MWSmce083	C11H12O4	Ferulic acid methyl ester	Phenolic acids	Phenolic acids	2309-07-1	3	80475.4	98227.7	75678.5	10300.6	16601.2	11398	1.27625	0.0057414	0.0316376	0.15056	-2.73159	down
Laxp004658	C15H20O5	Phaseic Acid	Terpenoids	Sesquiterpenoids	24394-14-7	1	257830	281716	286296	2.41601e+06	2.23859e+06	2.46843e+06	1.29294	0.000933463	0.0152995	8.62518	3.10855	up
MWSslk090	C16H22O11	Monotropein	Terpenoids	Monoterpenoids	5945-50-6	3	13389.2	11475	12095.8	95063.3	107937	88222.1	1.28949	0.00431461	0.0269488	7.87937	2.97808	up
pma0634	C28H38N4O4	N1,N5-Bis(p-coumaroyl)spermine	Alkaloids	Phenolamine	-	3	5562.2	33555.3	8089.38	316558	471738	225348	1.224	0.0445046	0.104522	21.4724	4.42441	up
Lhhp102233	C12H16O4	(E)-2,3,4-rimethoxy-5-1-propenyl)phenol	Others	Others	-	3	256905	188566	179777	1.24738e+06	1.64663e+06	1.57495e+06	1.27833	0.00725878	0.0344684	7.14751	2.83744	up
Lmhn002895	C23H20O12	Feruloylcaffeoyltartaric acid	Phenolic acids	Phenolic acids	-	3	18839.7	15620.2	14713	842896	684973	794717	1.29269	0.0037604	0.025408	47.2331	5.56173	up
mws1172	C22H22O10	Trifolirhizin (Maackiain-3-O-glucoside)	Flavonoids	Isoflavones	6807-83-6	3	20536.5	32184.1	46786.7	725402	552337	587060	1.27622	0.00704403	0.0344684	18.7403	4.22807	up
Lmmp004720	C37H34O20	Apigenin-7-O-(2''-feruloyl)glucuronide-4'-O-glucuronide	Flavonoids	Flavones	-	2	100616	110620	156760	19556935	16920080	1.38741e+07	1.29084	0.00956652	0.0401803	136.825	7.09619	up
MWSslk106	C8H11N	2-Phenylethylamine	Alkaloids	Benzylphenylethylamine alkaloids	156-28-5	3	1.39902e+06	1.1818e+06	1.12275e+06	2.20476e+07	1.80934e+07	1.69989e+07	1.29129	0.00719347	0.0344684	15.4283	3.94751	up
pmp000114	C21H24O8	5,6,7,8,3',4'-Hexamethoxyflavanone	Flavonoids	Flavanones	-	3	81150.7	28782	38189.6	329886	284709	262217	1.22458	0.000842584	0.0144238	5.91951	2.56548	up
pmb0069	C7H7NO	Benzamide	Alkaloids	Alkaloids	55-21-0	3	1.32629e+06	1.23265e+06	1.11853e+06	1.89762e+07	1.64108e+07	1.59177e+07	1.29283	0.00343978	0.0249979	13.9511	3.8023	up
Lwhp010633	C10H9NO	Echinopsine	Alkaloids	Quinoline alkaloids	83-54-5	3	255479	81606.8	142305	1.21965e+06	1.20897e+06	894541	1.22249	0.00475642	0.0286269	6.93206	2.79328	up
MWSmce498	C27H30O14	Apigenin-7-O-neohesperidoside (Rhoifolin)*	Flavonoids	Flavones	17306-46-6	3	31170.8	22985.3	15005	242568	211508	215862	1.27363	0.000436058	0.011197	9.68662	3.27599	up
Smjn005692	C15H18O7S	deacetvlmatlicarin-8-O-sulfite	Terpenoids	Sesquiterpenoids	-	2	395002	479168	334829	1.70102e+07	1.34137e+07	1.53577e+07	1.2924	0.00480286	0.0287857	37.8674	5.24289	up
pme2601	C3H6O3	3-Hydroxypropanoic acid	Organic acids	Organic acids	503-66-2	3	137591	227030	156019	933622	931814	867053	1.27562	4.26153e-05	0.00516616	5.24833	2.39186	up
pmb0774	C10H12N2O	N-Hydroxytryptamine	Alkaloids	Plumerane	-	3	1.65735e+06	1.07627e+06	1.38695e+06	1.09704e+07	1.27792e+07	7.21645e+06	1.26452	0.0308019	0.0817521	7.51499	2.90977	up
Zmgn002106	C11H13NO3	N-Acetyl-L-phenylalanine	Amino acids and derivatives	Amino acids and derivatives	2018-61-3	1	1.90299e+06	1.15538e+06	1.95635e+06	1.98872e+07	1.72154e+07	1.7524e+07	1.27863	0.00123868	0.0161728	10.8932	3.44536	up
Zajp000573	C7H13NO2	N-(4-oxopentyl)-acetamide	Alkaloids	Alkaloids	-	1	93664.7	192315	59337.6	1.22213e+06	1.30956e+06	1.3852e+06	1.25253	5.21183e-05	0.00516616	11.3429	3.50372	up
Qmyp122019	C15H20O3	Tessaric acid(ISO1)	Terpenoids	Sesquiterpenoids	-	2	2.08562e+06	1.89935e+06	2.32924e+06	551305	106710	478034	1.12744	0.000779149	0.0141781	0.179919	-2.47458	down
Lalp006086	C17H14O6	fistulaflavonoid B	Phenolic acids	Phenolic acids	-	2	328715	335400	524300	7.47896e+06	6.06537e+06	7.01849e+06	1.2849	0.00347305	0.0250819	17.3027	4.11293	up
MWSmce157	C7H13NO2	Stachydrine	Alkaloids	Pyrrole alkaloids	471-87-4	3	8194.91	5966.99	3340	431832	364310	381512	1.2851	0.00262778	0.0229567	67.2872	6.07226	up
Lmmp003783	C21H18O13	Quercetin-3-O-glucuronide	Flavonoids	Flavonols	22688-79-5	3	36675	29086.3	16750.4	195140	117066	126829	1.2343	0.0343114	0.0874711	5.32087	2.41166	up
Hmln003405	C20H16O12	Ellagic acid-4-O-rhamnoside	Tannins	Tannin	-	3	234718	258977	226267	9	9	9	1.29349	0.00166459	0.0186895	3.75019e-05	-14.7027	down
Lmtp002822	C25H26O13	Apigenin-6-C-arabinoside-8-C-xyloside*	Flavonoids	Flavones	-	1	975400	1.09482e+06	1.07038e+06	9.80864e+06	7.69698e+06	8.34442e+06	1.29181	0.00659424	0.0334418	8.23091	3.04105	up
pmb3062	C17H22O10	1-O-Eudesmoylquinic acid	Phenolic acids	Phenolic acids	-	3	48396.3	29157.1	39748	9	9	9	1.2933	0.0196584	0.0604129	0.000230176	-12.085	down
Lmmp004807	C38H36O21	Chrysoeriol-7-O-[2''-O-(2'''-Feruloyl)glucuronyl]glucuronide	Flavonoids	Flavones	-	2	171336	69728.6	137642	6.25709e+06	6.39742e+06	9.00399e+06	1.27808	0.0154049	0.0509828	57.1907	5.83771	up
NK10264324	C6H6O3	Phloroglucinol; 1,3,5-Benzenetriol	Phenolic acids	Phenolic acids	108-73-6	2	2.14066e+07	2.06473e+07	2.03404e+07	1.71908e+06	1.85924e+06	1.20266e+06	1.28624	5.37051e-06	0.00310281	0.0766251	-3.70604	down
MWS04447	C6H11NO2	Homoproline	Amino acids and derivatives	Amino acids and derivatives	56879-46-0	3	2.19821e+07	3.06239e+07	2.15642e+07	4.83009e+06	4.07222e+06	5.43687e+06	1.2719	0.0197147	0.0605054	0.193328	-2.37088	down
pme1987	C3H7NO2	L-Alanine	Amino acids and derivatives	Amino acids and derivatives	56-41-7	3	11275.3	8253.27	8130.54	47159.8	53699.7	55752.5	1.28031	0.00122077	0.0161728	5.66222	2.50137	up
pmp000791	C15H10O5	Moracin Y	Phenolic acids	Phenolic acids	1252581-54-6	3	33875.8	29409.1	27867.3	1.17856e+06	1.06513e+06	1.06619e+06	1.29323	0.0012009	0.0160421	36.3117	5.18236	up
MWSprf018	C30H48O2	3-Hydroxylup-20(29)-en-28-al (Betulinaldehyde)	Terpenoids	Triterpene	13159-28-9	2	138785	144587	104825	7.16005e+06	5.47668e+06	6.3213e+06	1.29248	0.00608058	0.032373	48.8361	5.60988	up
MW0063708	C30H48O4	Sumaresinol	Terpenoids	Triterpene	559-64-8	3	4751.14	6652.77	7273.4	122792	99503.6	101901	1.28817	0.00486719	0.0288888	17.3578	4.11751	up
pmp000592	C27H30O15	Apigenin-7,4'-di-O-Glucoside	Flavonoids	Flavones	-	3	358289	339215	455735	18740.1	78360	13229	1.19981	0.00281822	0.0229567	0.0956688	-3.38581	down
pmb0130	C12H14N2O	Acetryptine	Alkaloids	Plumerane	3551-18-6	3	899164	475247	644850	1.70821e+07	1.47804e+07	1.72104e+07	1.28392	0.00206424	0.0211761	24.3024	4.60302	up
Yamp002343	C11H13NO3	1-[2-(Furan-2-yl)-2-oxoethyl]piperidin-2-one	Alkaloids	Alkaloids	-	3	4.65958e+06	1.02997e+07	4.23816e+06	3.45512e+07	3.76119e+07	2.91409e+07	1.2318	0.00122681	0.0161728	5.27695	2.39971	up
Lmzn001572	C27H26O18	Scutellarein-7-O-glucuronosyl-(1->2)-glucuronide	Flavonoids	Flavones	150641-65-9	1	11887.8	2165.37	8649.46	72150.4	57854	49520.3	1.16696	0.00740696	0.034576	7.90765	2.98325	up
pmn001669	C12H14O5	Methyl sinapate	Phenolic acids	Phenolic acids	20733-94-2	3	7918	6544.25	6547.59	38798.1	30567	43312.2	1.28123	0.0135581	0.0481301	5.36307	2.42306	up
Lmmp004628	C39H38O22	Chrysoeriol-7-O-[2''-O-(2'''-Sinapoyl)glucuronyl]glucuronide	Flavonoids	Flavones	-	2	11670	8301.49	27255.7	1.98733e+06	2.36137e+06	2.43102e+06	1.27841	0.00369657	0.025408	143.555	7.16546	up
Zmxp004471	C15H10O6	Thunberginol B	Lignans and Coumarins	Coumarins	147666-81-7	1	30980.7	63342.2	68355	1.44955e+06	1.41405e+06	1.65546e+06	1.27917	0.00219591	0.0214355	27.7792	4.79593	up
Lamp008170	C18H20O6	5,7,4'-Tri-O-Methylcatechin	Flavonoids	Other Flavonoids	105330-59-4	2	16163.4	141954	170105	4.55314e+06	3.74148e+06	6.60575e+06	1.21429	0.0291142	0.0786015	45.3972	5.50453	up
Zbqp001937	C9H18N2O3	2,6-diamino-7-methyl-5-oxooctanoic acid	Amino acids and derivatives	Amino acids and derivatives	-	2	917560	139891	798061	3.49023e+06	3.09881e+06	2.98874e+06	1.08595	0.00179434	0.0196527	5.16179	2.36787	up
Zjxp110323	C15H20O3	Telekin/Ivalin	Terpenoids	Sesquiterpenoids	-	3	819341	715522	1.26766e+06	77803.4	88365	201210	1.23421	0.0351587	0.0888718	0.131088	-2.93139	down
Lmtp002942	C25H26O13	Apigenin-6,8-di-C-arabinoside*	Flavonoids	Flavones	-	1	432568	450918	448126	6.74412e+06	5.97584e+06	6.55275e+06	1.29371	0.0014789	0.0175863	14.4732	3.85531	up
Lskp211459	C30H46O2	Olean-12-ene-3,16-dione (Maniladione)	Terpenoids	Triterpene	-	2	75025	37406	35010	2.42784e+06	2.30589e+06	1.79484e+06	1.28217	0.00799014	0.0359245	44.2792	5.46856	up
pmp000566	C16H14O5	Claussequinone	Flavonoids	Other Flavonoids	35878-39-8	3	53597.9	30969	40010	308574	268840	241940	1.27239	0.00351577	0.0251188	6.57709	2.71745	up
pme0274	C6H13NO2	6-Aminocaproic acid	Organic acids	Organic acids	60-32-2	2	305880	151238	404203	2.00645e+06	1.82103e+06	1.7752e+06	1.23436	0.000102665	0.00638354	6.50475	2.70149	up
Qmqp101742	C35H40O11	Chloramultilide D	Terpenoids	Sesquiterpenoids	1000995-49-2	3	3094.43	532.459	4167.09	46398.3	52725	28748.1	1.18088	0.0283753	0.077278	16.4064	4.03619	up
MWS00275g	C9H11NO3	DL-O-tyrosine	Amino acids and derivatives	Amino acids and derivatives	2370-61-8	1	1.09412e+06	93990.2	878627	4.28028e+06	4.6036e+06	4.17894e+06	1.05547	0.00253042	0.0229325	6.3205	2.66004	up
Lhlp111209	C20H32O3	Cupressic acid	Terpenoids	Ditepenoids	1909-90-6	2	104244	48637.9	28398.1	459725	372689	420429	1.21606	0.000483697	0.0119563	6.9111	2.78892	up
pmb2792	C18H30O3	13-Hydroxy-6,9,11-octadecatrienoic acid	Lipids	Free fatty acids	74784-20-6	2	11869.5	10903.9	5365.69	48418.4	51259	48902.4	1.24411	0.000634559	0.0136717	5.28017	2.40059	up
Smrp002240	C15H10O5	Sulphuretin	Flavonoids	Aurones	120-05-8	3	63162.3	108380	124600	1.46291e+06	1.13524e+06	1.23289e+06	1.27684	0.00537249	0.0303565	12.9365	3.69337	up
ML10179289	C8H10O	2-Phenylethanol	Phenolic acids	Phenolic acids	60-12-8	2	1.82116e+06	1.61614e+06	1.25761e+06	2.61128e+07	2.12545e+07	2.02988e+07	1.28918	0.00690357	0.0342557	14.4127	3.84926	up
mws0011	C17H24O9	Syringin	Phenolic acids	Phenolic acids	118-34-3	3	27133.4	54609.8	30423	516537	558831	513009	1.2791	5.16417e-05	0.00516616	14.1609	3.82384	up
Lmmp004300	C42H40O25	Apigenin-7-O-{3''-O-[2'''-O-(2''''-p-Coumaroyl)glucuronyl]glucuronyl}glucuronide	Flavonoids	Flavones	-	3	158425	22146.6	57008.1	8.17733e+06	8.78154e+06	6.64439e+06	1.25708	0.00643006	0.0330031	99.3488	6.63443	up
Lmgp004959	C29H34O16	Tricin-7-O-neohesperidoside*	Flavonoids	Flavones	53766-40-8	3	9	9	9	447693	447595	336624	1.2936	0.00802432	0.0359384	45626.4	15.4776	up
Hmgp003086	C29H34O16	Tricin-7-O-rutinoside*	Flavonoids	Flavones	-	3	9	9	9	447693	447595	336624	1.2936	0.00802432	0.0359384	45626.4	15.4776	up
Lmmp007120	C33H30O16	Tricin-7-O-(2''-feruloyl)glucuronide	Flavonoids	Flavones	-	3	11898.2	20961.7	28751.4	252490	227303	219339	1.2663	0.000384309	0.0107372	11.3474	3.5043	up
Zjxp110313	C16H24O3	2α-Methoxyeudesma-3,11(13)dien-5αH-12-oic acid*	Terpenoids	Sesquiterpenoids	-	3	9	9	9	266213	200648	198863	1.29388	0.00982507	0.0401985	24656.5	14.5897	up
Lmzp004885	C17H14O7	Tricin (5,7,4'-Trihydroxy-3',5'-dimethoxyflavone)	Flavonoids	Flavones	520-32-1	2	133801	99337.3	127345	9.7304e+06	9.14955e+06	9.75742e+06	1.29198	0.000427571	0.0111024	79.4416	6.31182	up
Lmjp004839	C18H16O8	Arcapillin (2',4',5-trihydroxy-5',6,7-trimethoxyflavone)	Flavonoids	Flavones	83162-82-7	2	495006	602083	459102	85962.3	114970	79714.9	1.27734	0.00712748	0.0344684	0.180342	-2.47119	down
pmp001260	C22H37NO3	N-(2-Hydroxyethyl)eicosapentaenoic acid	Lipids	Free fatty acids	-	3	9	9	9	772079	827299	778963	1.29358	0.000479916	0.0119563	88086.7	16.4266	up
Lmhp008337	C19H40NO7P	LysoPE 14:0(2n isomer)*	Lipids	LPE	-	3	18013	16480.6	13128.8	147947	166162	111051	1.28213	0.0156026	0.0514372	8.92772	3.15829	up
Wmnp000001	C30H48O4	3,12-Dihydroxyoleanan-28,13-olide (Oleanderolide)	Terpenoids	Triterpene	-	2	308095	387079	292005	2.21698e+06	1.92809e+06	1.79987e+06	1.28776	0.00380653	0.0254246	6.02214	2.59028	up
Lmmp003487	C27H26O18	Luteolin-7-O-glucuronide-(2→1)-glucuronide	Flavonoids	Flavones	-	2	8078.32	34025.3	26675	319850	289866	265889	1.23085	0.000679389	0.0137725	12.7308	3.67025	up
zjmp120216	C30H46O4	11-Hydroxy-3-oxours-12-en-28-oic acid	Terpenoids	Triterpene	-	3	65360.8	38022.2	21762.2	589962	684032	748871	1.26196	0.00320191	0.0244076	16.1641	4.01472	up
Lmmp004360	C44H44O27	Tricin-7-O-[glucuronyl(1→3)]-[(2''-O-p-Coumaroyl)glucuronyl](2→1)glucuronide	Flavonoids	Flavones	-	3	60033.2	35010	40975.8	2.05834e+07	2.30228e+07	2.17481e+07	1.29122	0.00104707	0.0155917	480.479	8.90833	up
Lhwp110301	C30H46O4	19-Hydroxy-2-(hydroxymethyl)-A(1)-norursa-2,12-dien-28-oic acid (Coleonolic acid)	Terpenoids	Triterpene	-	3	11612.6	9154.05	11171.4	181648	93512.3	133775	1.27929	0.0386167	0.0944372	12.804	3.67852	up
HX1184	C30H48O	Lup-20(29)-en-3-one (Lupenone)(ISO2)	Terpenoids	Triterpene	-	2	16336.8	57880.1	22352.8	2.65484e+06	3.18243e+06	3.30165e+06	1.27811	0.00418763	0.0266601	94.6356	6.56431	up
pmn001477	C20H20O11	4-C-Glucose-1,3,6-trihydroxy-7-methoxyxanthone	Flavonoids	Other Flavonoids	-	3	9	9	9	63632.9	48390.8	57967.6	1.29383	0.00610759	0.032373	6295.98	12.6202	up
Lmhp005872	C25H30N2O6	Diferuloylcadaverine	Alkaloids	Phenolamine	-	3	40539	15504	36675	1938105	1.04307e+06	1.63803e+06	1.27269	0.0289752	0.0784096	49.8199	5.63865	up
Lmsp008264	C18H16O6	4'-Hydroxy-5,6,7-trimethoxyflavone	Flavonoids	Flavones	6938-18-7	3	37350	29864.7	20805.4	337526	302247	311257	1.28204	0.000238247	0.00923885	10.8047	3.43359	up
Lcyp000673	C17H14O7	Prudomestin	Flavonoids	Flavonols	3443-28-5	2	97389.9	76688.5	84103.7	7.4879e+06	6.4054e+06	6.30077e+06	1.29288	0.00323853	0.0244076	78.2164	6.2894	up
Lmmp003941	C42H40O25	Apigenin-7-O-(2''-p-Coumaroyl)glucuronide-4'-O-(2''-O-glucuronyl)glucuronide	Flavonoids	Flavones	-	3	18340	21407.2	29116.4	2.87585e+06	2.57931e+06	2.141e+06	1.29079	0.00714879	0.0344684	110.307	6.78539	up
Lmcp004369	C17H14O7	Quercetin-3',4'-dimethyl ether	Flavonoids	Flavonols	3306-29-4	1	9	9	9	245516	257253	372773	1.29298	0.0188134	0.0588655	32427.5	14.9849	up
mws1639	C11H10O5	Isofraxidin	Lignans and Coumarins	Coumarins	486-21-5	1	10882485	6.63468e+06	6.9549e+06	1.07237e+06	1.22279e+06	1.59603e+06	1.26749	0.0359446	0.0902482	0.159005	-2.65285	down
Zmcp102205	C15H24O	Spathulenol	Terpenoids	Sesquiterpenoids	6750-60-3	3	2.35346e+06	1.64276e+06	2.36634e+06	9	9	9	1.29372	0.0124701	0.0457435	4.24357e-06	-17.8463	down
pmn001667	C30H26O12	Procyanidin B4	Tannins	Proanthocyanidins	29106-51-2	3	12313	10005	14751	73851.9	51512.3	91426.2	1.26016	0.0336643	0.0862507	5.84828	2.54801	up
Sayp007706	C23H32O7	bonducellpin C	Terpenoids	Ditepenoids	-	2	7586.53	17441.5	37055.6	162454	128747	92296.6	1.163	0.0209797	0.0623189	6.1771	2.62693	up
Yshs000048	C30H46O4	6-Hydroxy-lupane-20(29)-en-3-one-28-oic acid	Terpenoids	Triterpene	-	3	8074.75	3447.05	6127.15	126926	142050	190366	1.27268	0.0160945	0.0522395	26.0266	4.70191	up
Lhwp110126	C30H48O4	3-Epialphitolic acid	Terpenoids	Triterpene	-	2	12136.4	29040.4	20616.9	294113	353942	415138	1.27169	0.00969626	0.0401985	17.2055	4.1048	up
WaYn002595	C13H18O10S	Salicin 6'-Sulfate	Phenolic acids	Phenolic acids	-	2	9	9	9	2.53339e+06	2.43132e+06	1.44004e+06	1.29338	0.0256531	0.0720344	237213	17.8558	up
Hmjp003123	C21H18O13	Quercetin-5-O-glucuronide	Flavonoids	Flavonols	-	2	123399	130690	95130.2	732985	764354	618991	1.28467	0.00375943	0.025408	6.06018	2.59936	up
pmp001110	C25H26O13	Apigenin-6-C-xyloside-8-C-arabinoside	Flavonoids	Flavones	-	1	322667	400957	619068	2.60832e+06	3.04192e+06	3.16501e+06	1.26337	0.000928655	0.0152995	6.56535	2.71487	up
zjnp112910	C27H44O7	Rhapontisterone B	Others	Others	698975-64-3	3	9	9	9	1.49936e+06	1803015	1.66927e+06	1.2934	0.00279921	0.0229567	184135	17.4904	up
pmb2975	C23H26O11	Hesperetin-3'-O-glucuronide	Flavonoids	Flavanones	1237479-05-8	3	45129.3	38610.5	31801.1	9	9	9	1.29314	0.00983915	0.0401985	0.000233683	-12.0632	down
Lmmp004361	C45H46O28	Tricin-7-O-[glucuronyl(1→3)]-[(2''-O-Feruloyl)glucuronyl](2→1)glucuronide	Flavonoids	Flavones	-	3	15950.1	6670	7685.7	1.35223e+07	1.3573e+07	1.42568e+07	1.28963	0.000294953	0.00985077	1364.49	10.4142	up
Lmcp004624	C16H12O6	3-Methylkaempferol	Flavonoids	Flavonols	1592-70-7	2	58350	31163.3	39094.9	818807	1.18901e+06	1.74322e+06	1.27213	0.0459778	0.107328	29.1664	4.86624	up
Zjlp100910	C36H56O10	Hederagenin-GlcA	Terpenoids	Triterpene Saponin	-	2	6483.85	8731.49	10652.2	317602	414180	308861	1.28718	0.00973469	0.0401985	40.2296	5.33019	up
Zjxp110307	C17H28O3	3-Hydroxy-3,7,11-trimethyldodeca-1,6E,10-trien-9-yl propionate	Terpenoids	Sesquiterpenoids	-	3	668902	344133	347148	2.8225e+06	2.46494e+06	2.48509e+06	1.25515	0.000179969	0.00770203	5.71433	2.51458	up
Zmgp005070	C24H26O13	Centaurein	Flavonoids	Flavones	35595-03-0	2	161381	101059	175684	18716.1	21059.3	43345	1.22046	0.0254131	0.0715342	0.189719	-2.39807	down
Zjlp100905	C31H48O5	3-Hydroxyolean-12-ene-28,30-dioic acid 30-methyl ester (Serjanic Acid)	Terpenoids	Triterpene	-	2	21990.9	53290.2	37113.5	591658	487550	635052	1.27252	0.00509175	0.0296981	15.2521	3.93094	up
MWSslk201	C21H26O10	Sec-O-Glucosylhamaudol	Others	Chromone	80681-44-3	2	2.08272e+06	2.7719e+06	3.30482e+06	429209	385296	296720	1.2732	0.0208671	0.0622109	0.136189	-2.87632	down
Yamp004530	C40H42N2O9	Pyramidaglain B	Alkaloids	Alkaloids	-	3	424618	91700	283082	4.42725e+06	4.53268e+06	3.23725e+06	1.22637	0.00891191	0.0382104	15.2579	3.93149	up
Zjmp102713	C30H46O4	2,3-Dihydroxylup-20(29)-en-28-oic acid	Terpenoids	Triterpene	-	1	29916.6	13980.1	21378.4	108651	138975	106234	1.24362	0.00500604	0.0294375	5.42106	2.43858	up
Zjxp110308	C17H28O4	5-Acetoxy-12-hydroxyfarnesol	Terpenoids	Sesquiterpenoids	-	2	1.35522e+07	1.05404e+07	1.16175e+07	1.69088e+06	2.3924e+06	1.62415e+06	1.28094	0.00487558	0.0288888	0.159827	-2.64542	down
Lmjn007168	C17H14O7	Quercetin-3,3'-dimethyl ether	Flavonoids	Flavonols	4382-17-6	1	13651.7	15184.8	17505.7	326901	210313	238712	1.28829	0.020114	0.061082	16.7434	4.06552	up
mws2186	C20H18O11	Avicularin(Quercetin-3-O-α-L-arabinofuranoside)	Flavonoids	Flavonols	572-30-5	3	9	9	9	110887	115780	69597.1	1.29308	0.0213016	0.0627332	10972.7	13.4216	up
Zmmp004183	C10H17NO5	(3-carboxypropanoyl)-L-leucine	Amino acids and derivatives	Amino acids and derivatives	-	1	213581	367145	318695	13295200	6.73773e+06	14418885	1.27976	0.0428873	0.102178	38.3044	5.25944	up
Zmhn002269	C11H10O6S	2,5-Dimethylchromone-7-O-sulfate	Others	Chromone	-	3	245580	162670	242345	9	9	9	1.29361	0.0152753	0.0507932	4.15004e-05	-14.5565	down
Laxp010102	C30H48O4	complogenin	Terpenoids	Triterpene	-	3	9	9	9	164895	117720	156901	1.29375	0.00975548	0.0401985	16278.4	13.9907	up
pmp001290	C27H26O17	Apigenin-7-O-(2''-glucurosyl)glucuronide	Flavonoids	Flavones	74696-01-8	1	3340	6670	3340	67120.9	74504.7	73026.9	1.27852	0.000141373	0.00726026	16.0788	4.00709	up
Lhhp111109	C35H40O11	Schisantherin J	Lignans and Coumarins	Lignans	135432-28-9	1	4916.97	6699.6	4656.26	46067.2	48081.8	40185.9	1.28654	0.0021028	0.0211761	8.25517	3.0453	up
Yalp003701	C33H44O15	Azadirachtin N	Terpenoids	Triterpene	-	3	275159	224593	455735	2.02294e+07	2.65475e+07	1.7999e+07	1.28353	0.0141221	0.0492385	67.7936	6.08308	up
Lmmp003850	C43H42O26	Apigenin-7-O-{3''-O-[2'''-O-(2''''-Feruloyl)glucuronyl]glucuronyl}glucuronide	Flavonoids	Flavones	-	3	6443.72	13372.1	11975	4.65596e+06	4.15937e+06	3.17173e+06	1.28997	0.0117689	0.0436156	377.059	8.55865	up
Lacp005577	C22H32O10	3-(3'-Hydroxybutyl)-2,4,4-trimethylcyclohexa-2,5-dienone malonyl glucoside	Terpenoids	Sesquiterpenoids	-	3	9	9	9	71690	117182	90624.9	1.29235	0.0194745	0.0600074	10351.7	13.3376	up
Lmtp006291	C15H22O3	Damsinic acid	Terpenoids	Sesquiterpenoids	22844-19-5	2	1.3586e+06	1.71698e+06	1.76241e+06	231257	493332	144658	1.20415	0.001541	0.0177177	0.179671	-2.47657	down
Hmgp002564	C29H30O19	Tricin-7-O-glucuronyl(2→1)glucuronide	Flavonoids	Flavones	83097-44-3	1	3491.83	4176.26	11853.1	106710	60490	64681.6	1.23081	0.0371376	0.0917685	11.8784	3.57027	up
Hmmp002474	C33H38O20	Apigenin-7-O-rutinoside-4'-O-glucuronide	Flavonoids	Flavones	-	3	9	3466.51	6670	215485	176974	204963	1.0498	0.00276842	0.0229567	58.8854	5.87984	up
